# Supplementary material
Source: publisher figshare collection journal article supplement (https://rs.figshare.com/ndownloader/files/15511100)
Supplement: Supplementary file 1 [file 15511100]

## Sheet: Sheet1
ID	class	toxin_class	CLP2057	CLP2065	CLP2068	CLP2071	CLP2105	CLP2109	CLP2137	KW1744	average_tpm	stdev_tpm	bcv_tpm	diff_exprs	length	pi	High_impact	Low_impact	Moderate_impact	Missense	Nonsense	Total_Nonsynonymous	Synonymous	Total_variants	tajimasD	tajimasD_nonsyn	tajimasD_synon	Global	NMvSM	NMvC	NMvS	SMvC	SMvS	CvS	EvW	GeoEvGeoW
3FTx-1	Toxin	3FTx	18.19	524.31	5630.35	7631.34	0	30.3	1691.1	10.6	1942.02	2997.68	1.54359	FALSE	300	0.422222	1	2	0	0	1	1	2	3	1.00011	1.38804	0.430062		0.6		1		0.866667		0.634615	0.634615
3FTx-2	Toxin	3FTx	0	4.66	27.07	119.21	0	0	4.94	0	19.485	41.3221	2.12071	FALSE	258	0.177778	0	2	1	1	0	1	2	3	1.13811		1.13811								1	1
BPP-1	Toxin	BPP	6464.7	1746.18	101.69	65866.5	28013.8	134446	18271.1	73668.5	41072.3	47070.1	1.14603	TRUE	597	0.26875	0	1	3	3	0	3	1	4	-0.338587	-1.05524	1.30896	-0.221317	-0.5	-0.714286	-0.0939694	-1	-0.169152	-0.517949	0.0138888	0.0393069
CRISP-1*	Toxin	CRISP	16878.5	1309.49	7391.62	6206.89	4994.91	1508.62	4553.65	19929.9	7846.7	6890.54	0.878145	FALSE	723	0.495833	0	1	1	1	0	1	1	2	1.65171	1.52862	1.03439	0.698953		1	0.602041	1	0.602041	-0.153846	0.766667	0.313255
CTL-1*	Toxin	CTL	16104.4	52716.6	27349.5	10800.6	34904.6	40251.8	23837.3	8349.59	26789.3	15297.9	0.571044	FALSE	429	0.125	0	3	1	1	0	1	3	4	-1.83088	-1.16221	-1.69654	-0.105263	0	-0.428571	0.0177126		-0.0961538	-0.4	0	0.0174334
CTL-2*	Toxin	CTL	17065.8	42232.8	16480.2	11589.5	32220.2	33435.3	23421.5	6932.31	22922.2	12130.4	0.5292	FALSE	450	0.4625	0	0	2	2	0	2	0	2	1.36859	1.36859		0.314062	0	1	0.463362	0	0.215558	-0.2	0.31746	0.135274
CTL-3	Toxin	CTL	2506.89	38699.3	5698.77	3324.46	101534	8844.85	6297.51	1956.58	21107.8	34669.8	1.64251	FALSE	459	0.158333	0	4	5	5	0	5	4	9	-0.0430558		-0.0430558							-0.127819		-0.127819
CTL-4	Toxin	CTL	1813.29	31124.1	5326.92	1195.85	94129	6206.57	13309.1	3797.62	19612.8	31656.3	1.61406	FALSE	441	0.207291	0	1	7	7	0	7	1	8	-1.12539	-1.51923	1.03439	-0.0948183	0.1	-0.38961	-0.0354562	0.514285	-0.126945	-0.212454	-0.0714285	0.00895576
CTL-5	Toxin	CTL	26218	15347.3	15931.5	10901.5	7984.95	16296.3	0.82	0	11585	8873.72	0.765963	FALSE	441	0.434343	0	3	3	3	0	3	3	6	1.40075	0.521278	1.85138	0.419643	-0.5	0.2	0.333333	0.5	0.6		0.420243	0.25
CTL-6	Toxin	CTL	519.08	3310.6	5091.04	3568.52	12951.5	11418	2949.37	4612.07	5552.52	4331.28	0.780057	FALSE	474	0.311667	0	2	3	3	0	3	2	5	0.112645	-0.467388	0.837748	-0.267123	-0.5	-1	0.025	-0.857143	-0.0367612	-1	0.0666666	0.0122394
CTL-7	Toxin	CTL	13641.3	3979.23	1749.12	3218.2	6769.85	2072.94	5063.37	3959.66	5056.71	3821.33	0.755694	FALSE
CTL-8	Toxin	CTL	930.32	5114.59	325.92	545.18	18711.9	754.85	2232.01	832.61	3680.92	6272.55	1.70407	FALSE	447	0.311667	0	0	5	5	0	5	0	5	0.112645	0.112645		0.292539	0	0.52381	0.44522	0.209023	0.352997	-0.153846	0.344762	0.111601
CTL-9	Toxin	CTL	2.2	2.66	79.26	264.18	22.24	1.23	5.77	767.79	143.166	267.833	1.87079	FALSE	477	0.47619	0	1	2	2	0	2	1	3	1.6381	1.60043	0.883089		0.777778		0.421053		1		0.398391	0.398391
CTL-10	Toxin	CTL	17.41	6.55	59.15	594.89	0.65	13.51	62.75	0.46	94.4213	203.728	2.15765	FALSE	504	0.294643	0	1	3	3	0	3	1	4	-0.273705	-0.120019	-0.448318		-0.428571				0.185715		0.216667	0.216667
CTL-11	Toxin	CTL	2.27	11.25	81.27	350.83	0	1.32	0.92	0	55.9825	122.328	2.18511	FALSE	495	0.533333	0	1	3	3	0	3	1	4	1.79291	1.66136	1.13811		-0.5
Ficolin-1	Toxin	Ficolin	0.41	1.25	8.4	130.33	0.85	0.23	7.6	4.38	19.1812	45.0279	2.34749	FALSE	987	0.294643	0	2	2	2	0	2	2	4	-0.273705	-0.57783	0.129959				0.285714		0.257143		0	0
Ficolin-2	Toxin	Ficolin	1.01	5.81	16.83	69.98	2.27	0.23	8.71	3.9	13.5925	23.4016	1.72166	FALSE	1011	0.380952	0	4	3	3	0	3	4	7	1.3702	0.837748	1.37634
FusedToxin-1	Toxin	FusedToxin	0	0	7.4	229.18	0	0	10.13	0	30.8388	80.243	2.60202	FALSE
HYAL-1	Toxin	HYAL	736.2	369.48	650.33	682.21	528.13	583.32	591.97	697.08	604.84	116.941	0.193342	FALSE	1350	0.393333	0	3	2	2	0	2	3	5	1.00569	0.554633	1.05569	0.105059	0	0.15	0.145244	-0.0681817	0.142511	0.133333	0.054762	0.19042
KUN-1	Toxin	KUN	110.68	207.29	90.76	154.03	128.67	228.71	146.08	98.9	145.64	49.9694	0.343102	FALSE	759	0.379167	0	2	2	2	0	2	2	4	0.807664	1.08547	0.236128	0.523622	0	1	0.734694	0.52381	0.583915	-0.153846	0.555555	0.442618
LAAO-1	Toxin	LAAO	5038.84	12176.5	17734.8	20619	22464.5	23408.1	36057	22479.3	19997.3	9041.35	0.452129	FALSE	1551	0.261538	0	11	2	2	0	2	11	13	-0.509667	-1.49796	-0.188072	-0.0403017	0.1	0.3	0.0567701	-0.634286	-0.0792377	-0.329137	0.0499223	0.0693887
MYO-1	Toxin	MYO	4.42	10590.2	4806.21	1981.31	12432.5	5286.25	14090.6	17237.1	8303.58	6161.6	0.742041	TRUE	198	0.142857	0	0	1	1	0	1	0	1	-1.0535	-1.0535			0				0.131579		-0.044586	-0.044586
MYO-2	Toxin	MYO	1881.3	9759.04	1421.59	318.19	9072.29	37.05	87.9	21.95	2824.91	4129.6	1.46185	FALSE	186	0.227778	0	1	2	2	0	2	1	3	-0.707875	-0.188546	-1.16221	-0.043716	-0.166667	-1	0.25	-0.428571	0.131579		0.074074	-0.0472928
NGF-1	Toxin	NGF	9467.2	9713.4	5757.7	10202.3	6583.86	8740.32	12784.6	7700.49	8868.73	2218.9	0.250193	FALSE	726	0.297222	0	3	0	0	0	0	3	3	-0.0398569		-0.0398569	0.557052		0.8	0.586207	0.8	0.586207	0.333334	0.388889	0.321535
NUC-1	Toxin	NUC	1040.5	1488.71	959.57	1579.61	883.26	1190.47	1835.25	1160.6	1267.25	333.817	0.263419	FALSE	1767	0.309722	0	5	1	1	0	1	5	6	0.0949157	-1.16221	0.495379	0.183229	0.1	0.0615175	0.285753	-0.085714	0.048932	0.0266668	0.120635	0.14054
PDE-1	Toxin	PDE	573.32	405.18	541.87	795.02	366.51	703.59	893.66	764.18	630.416	189.404	0.300443	FALSE	2433	0.277778	0	8	4	4	0	4	8	12	-0.29899	0.00745111	-0.427557	0.0679423	-0.120833	0.0988928	0.0635287	-0.00802643	0.0012234	0.0634921	0.0833333	0.0113004
PLA2-1*	Toxin	PLA2	226858	62213.7	73443.6	318266	82100.4	191325	143746	95528.5	149185	90322.3	0.605438	FALSE	417	0.330555	0	0	3	3	0	3	0	3	0.280792	0.280792		0.660099	0	1	0.204082	0.333333	-0.568182	0.615385	0.0123457	-0.184426
SVMPII-1*	Toxin	SVMPII	4236.59	33261.2	38515.8	237.85	59917.2	19738.1	28754	13242.5	24737.9	19617.4	0.793008	FALSE	1437	0.372917	0	7	9	9	0	9	7	16	0.93613	1.66469	-0.141238	0.33796	0.0357143	0.565581	0.490831	0.0468479	0.242113	0.232099	0.263303	0.230492
SVMPII-2	Toxin	SVMPII	27787.4	5983.01	17712.6	9249.33	13123.8	6200.27	4910.18	11069.2	12004.5	7668.85	0.638833	FALSE	1437	0.303788	0	2	9	9	0	9	2	11	0.0303672	-0.31003	1.08547	0.251598	0.1	0.00751883	0.17477	0.503759	0.317577	0.122792	0.181313	0.187578
SVMPII-3	Toxin	SVMPII	560.6	13204.5	26445	1637.53	12460.4	7562.54	15131.2	16618.6	11702.5	8440.39	0.721244	TRUE	1464	0.269231	0	6	2	2	0	2	6	8	-0.415096	0.259961	-0.641365				0.198475		0.198475		0.330388	0.330388
SVMPII-4*	Toxin	SVMPII	8384.42	3423.59	8102.87	1069.58	4802.68	4234.1	3617.89	3734.26	4671.17	2457.88	0.52618	FALSE	1833	0.295833	0	5	11	11	0	11	5	16	-0.0723804	0.0683566	-0.324765	0.160028	0.166667	1	0.335823	-0.372522	0.0212759	-0.0888889	0.161309	0.0837136
SVMPII-5	Toxin	SVMPII	15.31	65.2	1621.13	44.13	4431.24	105.13	3150.63	1513.22	1368.25	1669.94	1.22049	FALSE	1431	0.323676	0	2	9	9	0	9	2	11	0.241054	0.71936	-1.35784		0.125		0.575991		0.289496		0.309574	0.309574
SVMPII-6*	Toxin	SVMPII	622.32	1021.41	2075.49	10.24	2545.35	726.24	1918.58	891.34	1226.37	860.905	0.701994	FALSE	1455	0.326289	0	4	9	9	0	9	4	13	0.279179	-0.0617787	0.85445	0.102818	0.6	1	0.112576		-0.260969	-0.167521	0.180849	0.0550369
SVMPIII-1	Toxin	SVMPIII	3203.27	33355.3	99827.8	16.8	73414.3	23120.7	34106.6	1151.35	33524.5	36225.7	1.08057	FALSE	1830	0.179167	0	3	1	1	0	1	3	4	-1.26856	-0.448318	-1.34917	0.394737		1	-0.0961538	1	-0.0961538	0.3	0	-0.0165676
SVMPIII-2	Toxin	SVMPIII	35049.5	9568.36	38944.4	24002.2	13751	18310.6	7544.95	42855.9	23753.4	13716.2	0.577442	FALSE	1806	0.229166	0	4	4	4	0	4	4	8	-0.8637	-0.511606	-0.987408	0.10264	-0.0714284	0.0285716	0.309023	-0.278195	0.186276	-0.4	0.190476	0.0943175
SVMPIII-3	Toxin	SVMPIII	37010.4	3245.12	9823.11	28903.6	498.76	6904.05	2923.43	18876.8	13523.2	13427	0.992893	FALSE	1848	0.330303	0	2	9	9	0	9	2	11	0.362775	0.367019	0.200738	0.488797	0	0.454545	0.65384	0.342857	0.595811	0.518519	0.377489	0.440966
SVMPIII-5*	Toxin	SVMPIII	19229.4	3766.87	11021.1	5054.15	6499.1	4948.12	7485.98	10419.9	8553.07	5029.39	0.588021	FALSE	1833	0.30375	0	10	10	10	0	10	10	20	0.0318267	-0.346913	0.40593	0.375458	0.395833	0.95	0.375096	-0.0936089	0.271243	0.254546	0.10373	0.105215
SVMPIII-4*	Toxin	SVMPIII	16085.2	3714.71	9675.64	7255.56	7053.02	4756.85	6981.91	11914.5	8429.67	4024.81	0.477457	FALSE	1833	0.266667	0	1	6	6	0	6	1	7	-0.405701	-0.331013	-0.448318	0.0785555	0	0.9	-0.158462	0.354477	-0.214586	-0.151852	0.0558608	-0.111923
SVMPIII-6	Toxin	SVMPIII	11619	2002.97	6395.81	5263.45	4372.48	3483.62	4670.68	9106.56	5864.33	3128.23	0.533433	FALSE	1806	0.202536	0	8	15	15	0	15	8	23	-1.33343	-1.36095	-1.05062	-0.0527807	0.0444444	0.389474	0.0349311	-0.333333	-0.0201826	-0.453333	0.0567633	0.0894607
SVMPIII-7*	Toxin	SVMPIII	13052.6	1025.42	3978.83	5465.2	2601.31	1955.68	263.72	9220	4695.34	4414.59	0.940207	FALSE	1806	0.143056	0	1	5	5	0	5	1	6	-1.7981	-1.69167	-1.16221	-0.0509607	-0.0666666	-0.428571	0.0746458	-0.428571	0.0746458	-0.4	0.0277778	-0.0169015
SVMPIII-8	Toxin	SVMPIII	951.99	2216.44	9936.79	6176.17	7712.24	2751.75	2238.31	4029.39	4501.64	3136.94	0.696845	FALSE
SVMPIII-9	Toxin	SVMPIII	6721.32	2710.87	10509	723.12	6084.1	1367.98	4091.78	1141.36	4168.68	3409.97	0.817997	FALSE	1800	0.238636	1	3	7	7	1	8	3	11	-0.786406	-0.539708	-1.05524	0.138135	0.0625	1	0.0815385	0.0258982	0.039939	0.0333333	0.0414141	0.0123685
SVMPIII-10*	Toxin	SVMPIII	5948.15	596.55	2565.26	1419.76	714.44	1302.21	1614.82	2204.19	2045.67	1712.42	0.837094	TRUE	1842	0.266026	0	4	9	9	0	9	4	13	-0.452245	-0.535712	-0.165568	0.140121	-0.266667	-0.0285713	-0.088682	0.317239	0.101959	-0.0177775	0.100436	0.0323195
SVSP-1	Toxin	SVSP	23186.8	32276	37460	10951.3	14415.1	28086.3	13480	7188.34	20880.5	10984.5	0.526065	FALSE	777	0.270238	0	6	1	1	0	1	6	7	-0.363944	-1.16221	-0.078611	0.267549	0.0714286	-0.237105	0.335115	0.4	0.851852	0.666667	0.184762	0.198207
SVSP-2	Toxin	SVSP	27456.2	8600.92	13066.5	4695.78	11223.8	12532.5	10365.9	15532.5	12934.3	6697.43	0.517805	FALSE	792	0.125	0	1	0	0	0	0	1	1	-1.16221		-1.16221	0	0	-0.428571	0.131579				0	-0.0640732
SVSP-4*	Toxin	SVSP	7846.94	19814.6	15675.5	698.51	12558.2	8948.99	16612.6	13264.7	11927.5	6000.03	0.503042	FALSE	777	0.315278	0	0	6	6	0	6	0	6	0.158016	0.158016		0.0478035	0	0.0245613	0.0277155	0.285714	0.133282	-0.0574358	0.0842592	0.187248
SVSP-3	Toxin	SVSP	18171.5	16252	14322.1	2835.09	11237.6	12514.2	11685.6	7494.68	11814.1	4877.36	0.412842	FALSE	804	0.125	0	0	1	1	0	1	0	1	-1.16221	-1.16221		0	0			-0.428571	0.131579		0	-0.0640732
SVSP-5	Toxin	SVSP	2741.25	10717.5	13320.8	218.57	6171.53	9387.92	8589.47	6744.05	7236.39	4249.88	0.587294	FALSE	777	0.209375	0	3	5	5	0	5	3	8	-1.10046	-0.889754	-1.05524	0.331566	0	0.571429	0.32124	0.306123	0.16783	0.28547	0.121528	0.0684216
SVSP-6	Toxin	SVSP	8750.23	4681.82	6433.03	1158.05	3945.37	7517.94	3104.44	5471.87	5132.84	2452.59	0.477824	FALSE	774	0.256944	0	3	3	3	0	3	3	6	-0.50454	-0.360506	-0.494109	0.0487388	-0.0666665	0.311278	-0.0983885	0.0857145	0.0237333	-0.0222222	0.00277783	0.0693413
SVSP-8	Toxin	SVSP	8910.24	6033.65	4541.03	1199.58	4002.7	4770.7	4906.78	3395.97	4720.08	2204.35	0.467016	FALSE	777	0.125	0	0	2	2	0	2	0	2	-1.49796	-1.49796		0	0			-0.428571	0.131579		0	-0.0640732
SVSP-7	Toxin	SVSP	6050.38	2716.74	3570.1	5211.72	6557.07	2196.22	5461.24	4495.94	4532.43	1577.04	0.347947	FALSE	783	0.4	0	0	1	1	0	1	0	1	0.649981	0.649981		0.258065			0.368421		0.368421	0	0.333333	0.634146
SVSP-9	Toxin	SVSP	3456.91	6730.7	13428.5	459.67	1.95	9686.78	656.53	393.42	4351.81	5080.81	1.16752	FALSE
SVSP-10*	Toxin	SVSP	8013.7	3429.51	4397.05	127.11	46.46	3664.49	9009.92	4984.24	4209.06	3230.52	0.767515	FALSE	783	0.395605	0	3	3	3	0	3	3	6	1.84629	2.1267	0.768414	0.642105		1	0.76		0.6	0.333333	0.626979	0.667383
SVSP-11	Toxin	SVSP	112.41	9197.79	2604.86	0.52	462.09	248.54	6037.56	2750.31	2676.76	3345.97	1.25001	FALSE	780	0.32967	1	1	2	2	1	3	1	4	0.261242	0.451477	-0.264521	-0.288716	0.363636	0.285714	0.025		-0.583333	-1	0.0342556	0.00239475
SVSP-12	Toxin	SVSP	3506.75	1367.51	2519.59	5008.58	1875.25	754.96	112.61	1422.42	2070.96	1577.21	0.761584	FALSE	789	0.235714	0	4	3	3	0	3	4	7	-0.767598	-0.413947	-0.857644	0.16118	0	-0.0171426	0.279534	0.6	0.390501	-0.0333333	0.225624	0.219557
SVSP-13	Toxin	SVSP	3018.37	1027.31	2076.8	146.56	2654.59	1358.91	3553.46	539.5	1796.94	1223.59	0.680932	FALSE	774	0.235417	0	6	2	2	0	2	6	8	-0.788933	-1.03789	-0.53609	0.211434	0	0.6	0.29317	0.21974	0.247001	0.114286	0.179563	0.219482
SVSP-14	Toxin	SVSP	1389.61	1534.25	1714.34	361.76	1308.36	1111.48	728.88	1263.97	1176.58	440.147	0.374089	FALSE	777	0.1775	0	3	7	7	0	7	3	10	-1.5329	-1.70018	-0.707875	0.0552864	0	0.188572	0.0342172	-0.05974	0.0620349	0.0358976	0.0246032	0.020505
SVSP-15	Toxin	SVSP	229.11	1011.26	2858.78	78.53	997.17	446.65	707.78	769.09	887.296	865.354	0.975271	FALSE	774	0.351666	0	2	8	8	0	8	2	10	0.622501	0.158121	1.6871	0.448128	0	-0.0612244	0.365005	0.2	0.367308	0.657143	0.156667	0.203762
VEGF-1	Toxin	VEGF	24842.1	11986.7	3736.43	52862.7	2933.13	16739.4	4915.78	2306.3	15040.3	17228.9	1.14551	TRUE	435	0.318333	0	4	1	1	0	1	4	5	0.185547	-1.16221	0.6779	-0.0283982	-0.166666	0.0112783	0.0210642	0.157895	-0.0065645	0	0.0166667	0.0895912
VEGF-2	Toxin	VEGF	172.58	381.73	171.89	129.45	249.18	384.49	478.9	148.36	264.573	132.609	0.501219	FALSE	579	0.125	0	2	0	0	0	0	2	2	-1.49796		-1.49796	0.169247		0.6	-0.0961538	0.6	-0.0961538	0.133333	0	0.0174334
Vespryn-1	Toxin	Vespryn	2974.79	2174.66	1395.24	2574.81	1060.16	2137.14	2978.69	2481.01	2222.06	694.229	0.312426	FALSE	669	0.125	0	1	0	0	0	0	1	1	-1.16221		-1.16221	-0.210526			-0.0961538		-0.0961538	-0.4	0	0.0989399
Waprin-1	Toxin	Waprin	19.44	86.24	38.56	108.9	24.9	88.38	40.46	63.59	58.8088	32.9617	0.56049	FALSE	405	0.273611	0	4	2	2	0	2	4	6	-0.315238	-0.330104	-0.23045	-0.0825816	0	0.6	0.0313784	-0.085714	-0.0617753	-0.3698	0.0737688	0.15613
14-3-3-ba	Nontoxin	Nontoxin	13.49	37.89	28.5	28.87	20.16	26.53	33.75	25.12	26.7888	7.58387	0.283099	FALSE
14-3-3-e	Nontoxin	Nontoxin	88.06	261.43	125.65	118.61	143.94	211.63	216.94	149.85	164.514	59.1152	0.359333	FALSE
14-3-3-s	Nontoxin	Nontoxin	3.26	7.85	14.29	40.76	5.22	5.98	15.53	5.76	12.3313	12.2982	0.99732	FALSE	741	0.152083	0	4	0	0	0	0	4	4	-1.54972		-1.54972	-0.109375	0	-0.428571	0.0210527	-0.428571	-0.0342105	-1	0	-0.00075765
14-3-3-t	Nontoxin	Nontoxin	214.03	372.9	454.01	467.51	285.34	460.58	524.68	395.88	396.866	103.575	0.260982	FALSE	738	0.325	0	1	0	0	0	0	1	1	0.155746		0.155746	-0.131148	-0.5	-1	0.25	-0.428571	0.131579		0.222222	0.0542698
14-3-3-z	Nontoxin	Nontoxin	88.23	280.66	383.7	139.11	188.17	221.1	324.41	126.52	218.988	103.531	0.472769	FALSE	738	0.125	0	1	0	0	0	0	1	1	-1.16221		-1.16221	0	0			-0.428571	0.131579		0	-0.0640732
15kDaSeleno	Nontoxin	Nontoxin	218.97	263.97	434.02	256.47	245.96	353.5	361.15	194.55	291.074	82.5698	0.283673	FALSE
25OligSyn1	Nontoxin	Nontoxin	5.16	291.89	17.43	61.96	4.89	386.09	1.25	41.04	101.214	150.329	1.48526	FALSE	1056	0.208754	0	2	7	7	0	7	2	9	-1.18518	-0.999583	-1.17552	0.106508	0.257143		0.0857145	0	0.0833333	-0.428571	0.0198413	-0.0375489
26SnonATP3	Nontoxin	Nontoxin	48.65	98.54	68.16	40.77	80.18	48.88	123.72	73.96	72.8575	28.0663	0.385222	FALSE	1566	0.243956	0	4	1	1	0	1	4	5	-0.653195	-1.0535	-0.360214	0.304769	-0.2		0.422222	-0.2	0.384615	0.422222	0.138351	0.175366
26SnonATPase11	Nontoxin	Nontoxin	16.34	22.41	35.11	6.19	20.75	14.18	45.24	12.46	21.585	12.7978	0.592901	FALSE	1269	0.233333	0	3	0	0	0	0	3	3	-0.654434		-0.654434	-0.0644087			0.048276		0.048276	-0.333333	0.111111	0.294947
26SProt2	Nontoxin	Nontoxin	32.58	61.1	35.68	54.5	43.64	60.56	68.28	29.27	48.2013	14.8418	0.307913	FALSE	2733	0.236842	0	19	0	0	0	0	19	19	-0.857567		-0.857567	0.00255696	0	0.257143	0.0389661	0.241376	-0.00127841	-0.192294	0.0680837	0.0842844
26SregS10B	Nontoxin	Nontoxin	70.62	80.42	113.85	52.19	55.88	78.65	134.49	57.94	80.505	29.386	0.36502	FALSE	1170	0.236111	0	2	1	1	0	1	2	3	-0.627713	-1.16221	-0.0823774	0.107843	0	-0.428571	0.274839	-0.428571	0.157729	0.444444	0.0555557	0.118044
28SribS25	Nontoxin	Nontoxin	6.91	44.07	31.37	20.35	24.48	28.15	38.74	17.51	26.4475	11.901	0.449985	FALSE	513	0.525	0	1	0	0	0	0	1	1	1.4737		1.4737	0.425	0	-0.272727	0.396601	0.6	0.75431	1.11022e-16	0.515152	0.511793
28SribS36	Nontoxin	Nontoxin	18.66	37.36	37.98	41.43	23.47	18.31	31.51	54.41	32.8912	12.465	0.378977	FALSE
28SrpS23	Nontoxin	Nontoxin	38.1	35.5	48.4	41.76	11.81	35.37	44.2	66.71	40.2312	15.3263	0.380955	FALSE	561	0.213889	0	2	4	4	0	4	2	6	-0.99357	-0.446724	-1.49796	-0.0453965	0.233333	0.451128	0.0488653	-0.428571	-0.0807084	-0.4	0.0166667	0.00826445
2OxyglutarateDH	Nontoxin	Nontoxin	21.88	32.09	34.9	18.39	20.86	22.79	20.17	15.59	23.3337	6.69108	0.286756	FALSE	3066	0.306667	0	4	1	1	0	1	4	5	0.0579688	0.155746	0.00745111	0.0334385	-0.0833332	-0.428571	0.185385	-0.428571	0.0107733	0.122222	0.0200001	0.177208
39SL21	Nontoxin	Nontoxin	81.17	97.86	154.89	87.08	94.33	115.51	149.5	76.89	107.154	30.2055	0.281889	FALSE	585	0.4	0	1	0	0	0	0	1	1	0.649981		0.649981	-0.563107	-0.333333	-0.428571	-0.513393	-0.428571	-0.513393	-1	-0.222222	-0.179775
39SL4	Nontoxin	Nontoxin	14.73	37.92	19.82	27.74	18.92	24.51	22.3	23.71	23.7063	6.96429	0.293775	FALSE	906	0.436111	0	2	1	1	0	1	2	3	1.29618	0.155746	1.61632	0.740045	0	1	0.877155	0.473684	0.542692	0.833333	0.396825	0.488747
39SL46	Nontoxin	Nontoxin	18.25	36.17	21.77	37.63	14.67	27.37	57.99	47.56	32.6762	15.0167	0.459559	FALSE	801	0.321429	0	7	4	4	0	4	7	11	-0.0171196	-0.706252	0.429445						0.0787879		0.0787879	0.0787879
39SrpL24	Nontoxin	Nontoxin	56.68	30.47	10.7	89.99	60.36	96.05	93.26	74.52	64.0037	30.9412	0.483427	TRUE	612	0.209091	0	5	0	0	0	0	5	5	-0.47556		-0.47556					0.500752	0.40053	0.133333	0.284784	0.145833
3bHDDIsom	Nontoxin	Nontoxin	288.08	121.33	54.31	91.84	106.51	148.91	143.73	251.52	150.779	79.8754	0.529752	FALSE	696	0.227778	0	2	1	1	0	1	2	3	-0.707875	0.155746	-1.03789	0.231975	0.25	0.6	0.172414	0.2	0.286516	-0.181818	0.166667	0.0192581
3bHDDIsom_2	Nontoxin	Nontoxin	11.91	35.28	15.92	30.11	20.7	33.53	84.3	46.33	34.76	22.9479	0.66018	FALSE	696	0.327778	0	3	0	0	0	0	3	3	0.254071		0.254071	0.191139	0	0.736842	-0.0410953	1	0.0039248	0.037607	0.169231	-0.0450588
40SrpS13	Nontoxin	Nontoxin	1560.72	1313.95	1938.03	1462.8	1015.17	1077	2704.49	2944.76	1752.12	724.586	0.413549	FALSE	456	0.26875	0	3	1	1	0	1	3	4	-0.338587	-1.16221	0.147188	0.177859	0.125	0	0.340692	-0.428571	0.144009	0.133333	0.0578948	0.102476
53Exorib2	Nontoxin	Nontoxin	22.68	34.45	48.87	29.04	26.09	33.62	45.01	45.66	35.6775	9.79387	0.274511	FALSE	2874	0.30625	0	8	0	0	0	0	8	8	0.0584313		0.0584313	0.149675	0.0333334	0.181818	0.135968	0.0597404	-0.0045873	-0.0846153	0.0769231	0.114479
60SAcRibP1	Nontoxin	Nontoxin	1464.55	2870.11	991.24	2525.37	1315.57	1815.87	1970	3366.14	2039.86	818.909	0.401454	FALSE	342	0.291666	0	2	0	0	0	0	2	2	-0.0823774		-0.0823774	0.263416			0.329078		0.329078	0.133333	0.266666	0.475471
60SrpL4	Nontoxin	Nontoxin	804.46	1344.85	1110.92	1773.14	663.72	915.9	2104.47	2752.59	1433.76	724.434	0.50527	FALSE	1122	0.125	0	0	1	1	0	1	0	1	-1.16221	-1.16221		-0.210526			-0.0961538		-0.0961538	-0.4	0	0.0989399
6PhosDeh	Nontoxin	Nontoxin	51.66	138.43	118.53	142.32	77.99	116.38	134.19	76.96	107.058	33.8105	0.315816	FALSE	1452	0.2	0	12	5	5	0	5	12	17	-1.33392	-0.652823	-1.50493	-0.00891979	0.0484849	-0.127819	0.123803	-0.428571	0.0104426	-0.283761	0.0433564	0.0505852
A13MG2bN	Nontoxin	Nontoxin	9.98	27.46	17.21	16.07	12.82	18.5	23.5	8.64	16.7725	6.44813	0.384447	FALSE	1341	0.140476	0	2	5	5	0	5	2	7	-1.88113	-1.9286	-1.03789	0.00565414	0	0.0857145	0.00310632	0.0857145	0.00310632	-0.106667	0.0238096	0.0646323
AATransporter1	Nontoxin	Nontoxin	59.94	64.36	110.17	65.19	14.22	48.24	60.6	47.78	58.8125	26.5532	0.451488	FALSE	1419	0.290476	0	4	3	3	0	3	4	7	-0.127319	0.601441	-0.684625	0.162243	0.0733334	-0.175324	0.260831	-0.376623	0.324007	0.128205	0.11746	0.241241
AATransporter3	Nontoxin	Nontoxin	18.45	55.55	23.95	20.91	19.85	32.94	38.78	38.4	31.1038	12.8453	0.412981	FALSE	1584	0.325	0	2	0	0	0	0	2	2	0.200738		0.200738	0.403361	0	1	1	0.0225565	0.436883		0.428571	0.247948
Abhydrolase13	Nontoxin	Nontoxin	35.72	40.3	77	39.36	44.83	60.31	76.77	38.32	51.5762	17.347	0.336336	FALSE	1014	0.225	0	2	0	0	0	0	2	2	-0.648609		-0.648609	-0.12799	0		0.0381301	-0.428571	-0.136182	-0.2	-0.0333333	0.0824216
Abhydrolase14A	Nontoxin	Nontoxin	9.12	11.63	19.05	22.83	9.69	17.74	23.2	21.77	16.8788	5.90619	0.349919	FALSE	801	0.291666	0	2	0	0	0	0	2	2	-0.0823774		-0.0823774	0.263416			0.329078		0.329078	0.133333	0.266666	0.475471
AcetCoASyn2	Nontoxin	Nontoxin	12.61	13.29	18.24	7.45	18.76	17.31	14.99	15.53	14.7725	3.69318	0.250004	FALSE	2037	0.296667	0	5	5	5	0	5	5	10	-0.0581514	-1.19959	1.09682	0.128408	-0.0555555	0.0730983	0.0373725	0.0164503	0.237623	0.0863249	0.0872295	0.112325
AcetylCoA	Nontoxin	Nontoxin	35.04	66.09	51.31	23.18	24.53	29.44	31.09	44.06	38.0925	14.8021	0.388583	FALSE	1248	0.20625	0	5	3	3	0	3	5	8	-1.13785	-0.814758	-1.10846	0.182824	0.125	0.390476	0.300126	0.0428572	0.197961	0.0777778	0.142361	0.137442
acetylCoA2	Nontoxin	Nontoxin	10.62	20.94	31.92	56.23	25.75	43.17	110.21	35.88	41.84	30.9091	0.738746	FALSE	1191	0.254167	0	6	4	4	0	4	6	10	-0.58411	-1.11717	-0.078611	-0.0686286	-0.0208333	0.0818182	0.0878859	-0.473376	-0.0614708	-0.247863	-0.00492669	0.00634791
AcetylCoATrans1	Nontoxin	Nontoxin	14.42	19.39	26.06	11.11	21.98	17.6	28.8	9.55	18.6138	6.84746	0.367871	FALSE	1650	0.201515	0	9	2	2	0	2	9	11	-1.25178	-1.03789	-1.15634	0.22265	0.142857	0.154286	0.295341	0.057143	0.155388	0.322222	0.0567101	0.0882073
AcetylgalactosamineKin	Nontoxin	Nontoxin	19.79	26.14	22.38	26.46	23.16	29.92	19.86	19.11	23.3525	3.86244	0.165397	FALSE	1377	0.241667	0	6	4	4	0	4	6	10	-0.738804	-0.792762	-0.551865	0.240076	0	0.302757	0.186634	0.342857	0.14416	0.133333	0.0803704	0.113618
AcetylglucosaminyltransA	Nontoxin	Nontoxin	39.54	40.49	54.46	28.24	19.19	41.35	51.08	37.57	38.99	11.3593	0.291338	FALSE	2235	0.294166	0	6	4	4	0	4	6	10	-0.0890901	0.0939606	-0.204812	0.00925979	1.25e-07	-0.436735	-0.0175617	-0.231168	0.177197	-0.158974	0.0485715	0.0625013
AcetylhydrolaseIBa	Nontoxin	Nontoxin	25.65	42.9	29.85	31.99	23.09	36.11	38.21	27.6	31.925	6.73916	0.211094	FALSE	1233	0.391666	0	4	0	0	0	0	4	4	0.937428		0.937428	0.189714	-0.0333333	-0.0545453	0.421532	-0.436364	-0.101675	0.3	0.0416668	0.118369
Acetyltransferase15	Nontoxin	Nontoxin	11.51	22.61	21.13	17	16.62	24.77	32.92	16.31	20.3588	6.57766	0.323088	FALSE	729	0.152083	0	3	1	1	0	1	3	4	-1.54972	-1.16221	-1.34917	0	0	-0.428571	0.131579	-0.714286	0.19079		0	-0.0810736
ACSBG2	Nontoxin	Nontoxin	12.63	16.52	13.02	36.94	31.12	24.06	41.71	35.48	26.435	11.4762	0.434131	FALSE	1980	0.27803	0	17	3	3	0	3	17	20	-0.202096	-0.143771	-0.19958					-0.465677	0.0842326	-0.214473	0.0384335	0.116057
Actin-a2	Nontoxin	Nontoxin	2196.42	8039.01	651.74	952.3	80.46	411.86	194.75	1854.82	1797.67	2634.47	1.46549	FALSE	1134	0.279166	0	2	0	0	0	0	2	2	-0.188546		-0.188546	0.487877	0.5	0.214285	0.555556	0.6		0.666667	0.0500002	0.118234
Actin-a2_2	Nontoxin	Nontoxin	7.2	10.77	4.45	4.59	6.64	9.66	8.29	25.65	9.65625	6.8328	0.707604	FALSE	1134	0.186813	0	3	2	2	0	2	3	5	-1.27212	-1.35784	-0.839843	0.0318548	-0.428571		-0.153846	-0.171428	0.149705	0.25641	0.0549292	0.0471076
Actin1	Nontoxin	Nontoxin	87.69	288.83	134.08	136.71	73.74	134.64	184.16	305.41	168.158	86.4535	0.514122	FALSE	1128	0.404166	0	4	0	0	0	0	4	4	1.06719		1.06719	0.27601	0.455556	0.257143	0.326048	0.0669857	0.142053	0.15	0.0267857	0.219413
Actin2	Nontoxin	Nontoxin	909.38	1266.7	1600.41	1349.58	769.2	877.26	1557.59	1901.63	1278.97	402.071	0.314371	FALSE	1128	0.125	0	1	0	0	0	0	1	1	-1.16221		-1.16221	0.54902		0.6		0.6		0.666667	0	-0.0640732
actin231A	Nontoxin	Nontoxin	22.81	35.63	25.01	49.31	43.71	36.66	73.19	42.66	41.1225	15.809	0.384436	FALSE	1113	0.216667	0	9	1	1	0	1	9	10	-1.04819	-1.16221	-0.908089	0.00568714	-0.0555555	-0.397402	0.0660165	-0.350649	0.125157	-0.00634929	0.037381	0.134301
Actin23comp3	Nontoxin	Nontoxin	84.4	157.45	157.67	141.3	111.6	132.61	133.38	138.15	132.07	24.2461	0.183585	FALSE	537	0.229166	0	8	0	0	0	0	8	8	-0.8637		-0.8637	-0.000726031	0.116667	-0.191688	-0.0141126	0.0818182	-0.0233884	-0.276364	-0.00446416	-0.0526601
Actin3	Nontoxin	Nontoxin	71.99	111.24	116.36	63.43	70.42	98.76	118.22	77.94	91.045	22.5816	0.248027	FALSE	1257	0.254167	0	4	0	0	0	0	4	4	-0.489978		-0.489978	0.0999108	0	-0.428571	0.345142	-0.619047	0.0501217	0.3	0.0142857	0.106054
Actin6	Nontoxin	Nontoxin	18.63	26.2	32.65	17.24	17.67	17.73	33.57	35.7	24.9237	8.06427	0.323558	FALSE	1188	0.176389	0	6	0	0	0	0	6	6	-1.4195		-1.4195	-0.00777183	-0.166666	-0.085714	-0.0239057	0.0857145	-0.0627769	-0.106667	0.0166667	0.0473642
ActinRel1B	Nontoxin	Nontoxin	163.41	321.45	193	305.42	155.69	244.72	292.5	145.02	227.651	72.3848	0.317963	FALSE	1110	0.309722	0	10	2	2	0	2	10	12	0.105926	-1.49796	0.560623	0.254355	0.0740741	0.124156	0.348624	0.0444805	0.258051	0.114286	0.212309	0.164017
ActinRel2	Nontoxin	Nontoxin	20.52	49.74	44.57	28.83	26.07	36.13	49.2	31.11	35.7713	11.017	0.307986	FALSE	1185	0.194444	0	6	0	0	0	0	6	6	-1.21442		-1.21442	0.0533231	-0.111111	-0.085714	0.00790705	-0.085714	0.102366	0.0666667	0.0444445	0.0734112
ActinRel4	Nontoxin	Nontoxin	28.12	64.86	49.81	42.37	26.53	42.69	46	46.34	43.34	12.1693	0.280786	FALSE	507	0.225	0	2	0	0	0	0	2	2	-0.648609		-0.648609	-0.0227273	0	-0.272727	-0.231214	0.0857145	0.0177126	1.11022e-16	-0.0333333	-0.0987236
ActinRel5-1	Nontoxin	Nontoxin	58.43	51.93	21.74	56.35	46.24	108.45	67.78	63.17	59.2612	24.3419	0.410755	FALSE	477	0.0833333	0	2	1	1	0	1	2	3	-0.448318	-0.448318							0		0	0
ActinRel5-2	Nontoxin	Nontoxin	26.62	33.6	32.39	17.76	14.51	23.14	30.95	32.62	26.4488	7.30743	0.276286	FALSE
ActinRelComp2	Nontoxin	Nontoxin	52.21	169.81	96.01	112.05	73.85	91.69	118.03	96.46	101.264	34.6331	0.342009	FALSE	903	0.125	0	4	0	0	0	0	4	4	-1.83088		-1.83088	-0.157894	0	-0.428571	-0.0392206		-0.0961538	-0.4	0	0.0581866
AcylCoA	Nontoxin	Nontoxin	381.32	265.4	613.88	576.21	252.91	312.52	424.1	624.31	431.331	154.731	0.358729	FALSE	267	0.358334	0	1	2	2	0	2	1	3	-1.16221		-1.16221	0.0916855	-0.333333	-0.428571	0.198653	-0.428571	0.198653	0.16	0.0873015	0.344298
AcylCoABinding7	Nontoxin	Nontoxin	176.79	288.76	192.68	65.85	121.23	101.62	139.86	149.33	154.515	67.5948	0.437464	FALSE
AcylCoADeh	Nontoxin	Nontoxin	11.97	12.23	25.57	12.85	10.37	14.6	16.86	6.58	13.8788	5.5946	0.403105	FALSE	1302	0.237778	0	11	4	4	0	4	11	15	-0.826557	-0.836016	-0.719924	0.113495	-0.095238	0.009524	0.0659402	0.141139	0.119505	0.0548564	0.0714704	0.113661
AcylCoAoxidase1-1	Nontoxin	Nontoxin	44.94	63.62	66.29	51	60.06	51.29	65.77	37.48	55.0563	10.5645	0.191885	FALSE	1983	0.270833	0	8	4	4	0	4	8	12	-0.387015	-0.857644	-0.0537198	0.191067	0.0833333	0.333333	0.292258	0.155639	0.156024	0.0444446	0.168988	0.166608
ADE2	Nontoxin	Nontoxin	18.14	28.03	27.4	23.2	21.46	18.13	35.36	37.52	26.155	7.35213	0.281098	FALSE	1281	0.21875	0	3	1	1	0	1	3	4	-0.857644	-1.16221	-0.494109	-0.00175131	-0.125	-0.127819	0.21992	-0.714286	-0.0129505	-0.4	0.0745615	-0.0445025
AdeninePRT	Nontoxin	Nontoxin	296.99	451.95	180.46	670.22	209.73	367.29	714.84	794.03	460.689	238.063	0.516755	FALSE	549	0.363889	0	6	0	0	0	0	6	6	0.710146		0.710146	0.371942	0	0.163636	0.570111	-0.0571427	0.510942	0.343434	0.34315	0.395808
AdenMonTran	Nontoxin	Nontoxin	21.07	32.48	11.4	19.02	37.13	39.35	43.96	13.28	27.2112	12.5522	0.461286	FALSE	1392	0.261364	0	8	0	0	0	0	8	8	-0.10876		-0.10876					0.162064	-0.00040592	-0.0851848	-0.0139503	-0.0208333
Adenosylhomocysteinase2	Nontoxin	Nontoxin	18.93	34.25	42.13	17.78	21.07	32.26	41.61	18.52	28.3187	10.4601	0.36937	FALSE	1584	0.245833	0	3	1	1	0	1	3	4	-0.576488	-1.16221	-0.14674	0.0262742	0	-0.428571	0.173395	-0.428571	0.0230777	-0.0444443	0.0388472	0.144451
AdenosylhomocysteinaseA	Nontoxin	Nontoxin	37.55	59.88	45.07	18.3	19.83	60.77	47.84	21.31	38.8188	17.4669	0.449961	FALSE	1302	0.161111	0	3	0	0	0	0	3	3	-1.34917		-1.34917	0.0407123	0	-0.428571	0.145191		0.172414	8.88178e-17	0.0555557	0.0732265
Adenovirus-E1B	Nontoxin	Nontoxin	4.53	18.22	1.44	15.56	4.34	5.08	2.47	14.03	8.20875	6.60294	0.804378	FALSE	618	0.187879	0	4	1	1	0	1	4	5	-0.744701		-0.744701	-0.18625	-0.428571		-0.333333	-0.428571	0.125	-0.333333	0.0625	0.267979
AdenylateKin2	Nontoxin	Nontoxin	109.55	185.52	125.53	141.19	118.68	131.8	151.21	144.23	138.464	23.472	0.169517	FALSE	714	0.269697	0	2	3	3	0	3	2	5	-0.411843	-0.903827	0.397346					0.0476193	-0.0763884	-0.1	-0.116973	-0.0071428
AdenylateKin6	Nontoxin	Nontoxin	40.11	33.65	63.43	34.38	40.26	50.34	64.01	34.27	45.0562	12.7204	0.282322	FALSE	516	0.479166	0	2	0	0	0	0	2	2	1.51015		1.51015	-0.0493967	-0.166666	0.736842	-0.356697	0.473684	-0.513393	0	0	-0.279353
AdenylosuccinateLyase	Nontoxin	Nontoxin	21.34	44.67	37.43	33.97	21.18	30.4	38.94	49.22	34.6437	10.1132	0.29192	FALSE	1464	0.225	0	0	2	2	0	2	0	2	-0.648609	-0.648609		-0.0580189			0.0539641		0.0539641	-0.276923	0.111111	0.285891
AdenylylCyclase1	Nontoxin	Nontoxin	35.29	66.82	35.69	56.78	37.29	63.15	124.74	49.1	58.6075	29.4683	0.502808	FALSE	1437	0.261111	0	10	5	5	0	5	10	15	-0.523255	-1.32716	0.00372612	0.0849759	-0.129629	0.234832	0.0723671	0.077307	0.02055	0.183333	0.0260671	0.0581455
ADH	Nontoxin	Nontoxin	65.53	44.29	61.4	63.75	32	50.16	65.96	60.99	55.51	12.2443	0.220578	FALSE	984	0.168333	0	2	3	3	0	3	2	5	-1.45474	-1.0018	-1.49796	0.0693712	0	-0.38961	0.139746	0.6	0.172414	0.333334	0.004762	0.0423101
Adipocyte	Nontoxin	Nontoxin	115.32	125.77	148.76	83.77	51.62	102.58	272.39	171.28	133.936	67.0531	0.500634	FALSE	1248	0.33125	0	4	0	0	0	0	4	4	0.310234		0.310234	0.215177	-0.5	0.2	0.219388	0.557143	0.32124	-0.311111	0.3125	0.144761
AdiponectinRec2	Nontoxin	Nontoxin	19.72	27.45	23.65	18.26	22.98	27.36	35.14	24.5	24.8825	5.26091	0.21143	FALSE	1149	0.243333	0	4	1	1	0	1	4	5	-0.634598	1.30896	-1.26856	0.066444	0.388889	0.077922	0.130244	-0.2	0.0575266	-0.327273	0.0022222	-0.00678602
ADP-ribosylArgHydrolase	Nontoxin	Nontoxin	19.99	26.3	24.6	14.09	19.69	20.73	23.72	17.42	20.8175	3.99206	0.191764	FALSE	1068	0.19	0	2	3	3	0	3	2	5	-1.21781	-1.0018	-1.03789	0.248855	0	1	0.172414	0.0476193	0.151997	0.333333	0.0666668	0.0870861
ADP-ribosylation4	Nontoxin	Nontoxin	121.61	163.12	145.89	103.73	160.78	165.52	159.75	96.9	139.662	28.1647	0.201663	FALSE
ADP-ribosylation4A	Nontoxin	Nontoxin	62.16	140.43	74.46	57.83	102.51	73.09	115.66	163.58	98.715	38.7334	0.392376	FALSE	603	0.273333	0	5	0	0	0	0	5	5	-0.30654		-0.30654	0.319312	-0.25	0.411278	0.444403	0.2	0.384615	0.133333	0.306667	0.188184
ADPPyrophos	Nontoxin	Nontoxin	19.57	26.48	20.92	40.49	21.06	33.46	23.83	29.43	26.905	7.2439	0.26924	FALSE	663	0.255	0	5	0	0	0	0	5	5	-0.50702		-0.50702	-0.0617196	-0.25	0	-0.147019	0.0476193	-0.0216189	-0.127351	0.0344446	-0.0404941
ADPRib14	Nontoxin	Nontoxin	12.42	9.48	7.36	18.6	7.8	13.43	11.92	25.28	13.2863	6.02887	0.453767	FALSE	579	0.125	0	1	0	0	0	0	1	1	-1.16221		-1.16221	0	0	-0.428571	0.131579				0	-0.0640732
ADPRibosyl1-1	Nontoxin	Nontoxin	148.1	425.71	280.29	117.9	255.95	188.69	342.29	190.64	243.696	103.608	0.425154	FALSE	546	0.125	0	2	0	0	0	0	2	2	-1.49796		-1.49796	-0.105263	0	-0.428571	0.0177126		-0.0961538	-0.4	0	0.0174334
ADPRibosyl1-2	Nontoxin	Nontoxin	0	0	0	86.63	0	151.8	0	0	29.8038	57.8692	1.94167	TRUE
ADPRibosyl1-4	Nontoxin	Nontoxin	177.36	185.16	364.38	167.84	184.98	242.27	324.03	157.54	225.445	78.2002	0.34687	FALSE	546	0.125	0	0	1	1	0	1	0	1	-1.16221	-1.16221		-0.210526			-0.0961538		-0.0961538	-0.4	0	0.0989399
ADPRibosyl2	Nontoxin	Nontoxin	30.78	55.68	29.61	37.06	30.46	45.26	25.89	44.78	37.44	10.2515	0.273812	FALSE	555	0.261111	0	5	1	1	0	1	5	6	-0.457215	-1.16221	-0.142511	0.325999	0	0.0666667	0.474138	0.154286	0.398226	0.444445	0.23545	0.198284
ADPRibosyl3-1	Nontoxin	Nontoxin	69.77	98.82	98.96	75.91	71.44	105.77	146.11	67	91.7225	26.7598	0.291748	FALSE
ADPRibosyl3-2	Nontoxin	Nontoxin	106.28	136.9	151.22	118.25	107.7	132.6	175.94	138.24	133.391	23.2656	0.174416	FALSE	1539	0.271528	0	6	6	6	0	6	6	12	-0.378212	-0.772718	0.0949157	0.113003	1.42857e-07	-0.0601504	-0.00537371	0.42406	0.0319647	0.0177779	0.00897433	-0.0306824
ADPRibosyl6	Nontoxin	Nontoxin	104.56	124.17	149.76	89.99	74.76	113.2	154.43	133.12	117.999	27.9296	0.236694	FALSE	612	0.125	0	1	0	0	0	0	1	1	-1.16221		-1.16221	0	0	-0.428571	0.131579				0	-0.0640732
ADPribosylation-5A	Nontoxin	Nontoxin	7.32	20.97	9.88	12	11.07	18.94	16.16	12.57	13.6137	4.67032	0.343059	FALSE
ADPRibosylation-8B	Nontoxin	Nontoxin	16.02	46.99	31.35	25.54	34.52	31.01	35.13	23.77	30.5413	9.18112	0.300614	FALSE
AffCuUp2	Nontoxin	Nontoxin	18.27	52.39	18.11	34.32	24.76	52.14	32.74	38	33.8413	13.4698	0.398028	FALSE	420	0.191667	0	3	0	0	0	0	3	3	-1.05524		-1.05524	-0.169087	-0.166666	-0.428571	-0.163684	-0.428571	-0.0652629	-0.4	-0.0222222	-0.0328358
AFGFIB	Nontoxin	Nontoxin	28.1	37.17	23.72	27.3	21.47	30.68	34.12	34.29	29.6062	5.46559	0.184609	FALSE	1074	0.238095	0	7	0	0	0	0	7	7	-0.73976		-0.73976	0.21944	0.166667	0.554286	0.147854	0.438961	0.0589655	0.12	0.114512	0.0552824
AHA1	Nontoxin	Nontoxin	20.79	24.53	29.12	17.56	16.8	21.97	33.79	8.45	21.6262	7.80845	0.361063	FALSE	1017	0.2375	0	5	1	1	0	1	5	6	-0.725392	-1.16221	-0.452344	0.152339	0.05	0.268421	0.185005	0.0541355	0.0811833	0.088889	0.100309	0.00975597
aKGDiO-ABH6	Nontoxin	Nontoxin	29.29	28.69	11.43	29.81	27.05	47.59	34.98	33.25	30.2613	10.0002	0.330462	FALSE	696	0.375824	0	7	3	3	0	3	7	10	0.877167	0.346776	1.00325	0.0637867	-0.771428		0.0583334	-0.107143	0.196162	-0.361905	0.245984	0.082869
Akirin2	Nontoxin	Nontoxin	14.9	32.43	14.19	20.93	19.5	17.6	24.92	24.54	21.1262	6.04526	0.286149	FALSE	579	0.166667	0	1	0	0	0	0	1	1	-0.912045		-0.912045					-0.428571	0.131579		0.211268	-1.14492e-16
AKT	Nontoxin	Nontoxin	70.58	138.48	116.44	110.89	83.55	122.93	156.37	97.44	112.085	28.1507	0.251155	FALSE	885	0.225	0	5	1	1	0	1	5	6	-0.867368	0.649981	-1.21781	0.292316	-0.0416665	0.0628574	0.0289823	0.234286	0.170308	0.555556	0.0370372	-0.0350681
AlcDe5III	Nontoxin	Nontoxin	79.98	130.48	144.15	119.42	70.89	71.61	165.91	122.61	113.131	35.4269	0.313149	FALSE	1125	0.319444	0	2	1	1	0	1	2	3	0.173909	0.649981	-0.188546	0.0250712	-0.166666	-0.272727	0.169358	-0.350649	0.028071	0.17094	0.0247864	0.247574
AldehydeDH2	Nontoxin	Nontoxin	63.41	91.1	41.94	37.24	24.76	39.91	60.36	87.25	55.7463	24.1022	0.432356	FALSE	1575	0.264286	0	8	2	2	0	2	8	10	0.0833538	-0.57783	0.363093						0.208333		0.208333	0.208333
AldoKetoRed1B1	Nontoxin	Nontoxin	9.54	25.82	29.94	20.87	21.37	8.51	9.09	7.64	16.5975	8.91165	0.536928	FALSE	951	0.304167	0	3	1	1	0	1	3	4	0.0290785	-0.448318	0.254071	-0.136033	0	-0.27619	-0.10813	0.6	0.069388	-0.651282	0.044643	0.0712868
AldolaseA	Nontoxin	Nontoxin	607.31	3011.59	298.6	257.54	185.98	166.75	388.16	1151.68	758.451	965.951	1.27358	TRUE	1095	0.4	0	1	0	0	0	0	1	1	0.649981		0.649981	-0.00923788	0	-0.272727	-0.176211	0.6	0.172414	-0.181818	0.0769231	-0.0620757
ALG13	Nontoxin	Nontoxin	26.8	39.34	41.45	38.44	36.74	45.25	47.44	31.26	38.34	6.83581	0.178295	FALSE	492	0.125	0	1	0	0	0	0	1	1	-1.16221		-1.16221	0	0	-0.428571	0.131579				0	-0.0640732
AllograftInflammatory1	Nontoxin	Nontoxin	46.04	94.65	41.11	86.96	37.01	54.12	43.79	88.28	61.495	24.1629	0.392925	FALSE	453	0.125	0	2	0	0	0	0	2	2	-1.49796		-1.49796	-0.210526			-0.0961538		-0.0961538	-0.4	0	0.0989399
AlphaCrystallinB	Nontoxin	Nontoxin	250.38	632.01	118.36	335	114.08	238.83	201.91	244.18	266.844	164.387	0.616042	FALSE
AlphaEndosulfine	Nontoxin	Nontoxin	16.91	77.71	35.26	45.25	33.3	61.5	73.24	35.9	47.3837	21.3739	0.451081	FALSE	360	0.203296	0	2	0	0	0	0	2	2	-0.84939		-0.84939		0.25		0.555556		0.131579		0.038052	0.038052
AlphaEnolase	Nontoxin	Nontoxin	165.94	216.64	154.31	197.42	182.41	210.79	279.06	118.44	190.626	48.0426	0.252025	FALSE	1305	0.269872	0	13	0	0	0	0	13	13	-0.403026		-0.403026	-0.0245107	0.0277778	0.380952	-0.0386594	-0.0401	-0.117242	-0.276612	0.0263126	0.0254115
AlphaGlobin	Nontoxin	Nontoxin	542.82	639.81	101.54	18.4	68.01	229.08	1133.44	17.46	343.82	398.4	1.15874	FALSE	429	0.225	0	2	0	0	0	0	2	2	-0.648609		-0.648609	-0.0227273	0	-0.350649	-0.0498175	0.6	-0.0961538	1.11022e-16	-0.0333333	-0.0987236
AminoAcidTrans1	Nontoxin	Nontoxin	4.8	39.74	17.4	11.62	16.89	38.86	41.13	30.54	25.1225	14.1961	0.565077	FALSE	1476	0.229762	0	7	0	0	0	0	7	7	-0.837194		-0.837194	-0.044007	-0.0666666	-0.714286	-0.00915892	-0.345865	0.0118499	-0.0333333	-0.0561224	-0.0114993
Aminoacyl-tRNASyn	Nontoxin	Nontoxin	130.49	104.28	171.58	107.87	84.21	89.39	191.54	172.68	131.505	41.7765	0.31768	FALSE	924	0.327778	0	3	0	0	0	0	3	3	0.254071		0.254071	0.153319	0	0.2	0.480482	-1.11429	-0.0129505	1.11022e-16	0.2	0.141293
AminopeptidaseA	Nontoxin	Nontoxin	44.43	33.73	31.88	25.57	27.45	39.28	52.67	30.18	35.6487	9.23203	0.258972	FALSE	2877	0.259444	0	7	8	8	0	8	7	15	-0.544919	-0.851239	-0.0994811	-0.0649211	-0.121212	-0.401731	-0.0268783	-0.262049	-0.00494651	-0.212604	0.00975793	0.0142354
AminopeptidaseN	Nontoxin	Nontoxin	70.86	50.46	22.32	143.53	54.7	72.44	84.41	35.09	66.7262	37.1161	0.556245	FALSE	2943	0.276111	0	21	9	9	0	9	21	30	-0.346658	0.073631	-0.518139	0.138701	0.107018	0.097143	0.19025	0.0128049	0.0941932	-0.0545737	0.0965898	0.0858444
Aminotransferase2-1	Nontoxin	Nontoxin	16.99	24.07	19.41	52.31	7.74	19.35	12.63	39.87	24.0463	14.8266	0.616587	FALSE	1506	0.208333	0	3	1	1	0	1	3	4	-0.965781	-1.16221	-0.627713	0.0790763	0	-0.428571	0.173395		0.187334	-0.0444443	0.133333	0.246452
AMN1	Nontoxin	Nontoxin	22.7	57.62	32.25	43.22	22.03	23.91	32.25	46.32	35.0375	12.9007	0.368196	FALSE	789	0.294444	0	2	1	1	0	1	2	3	-0.0665776	-0.448318	0.200738	0.228177		1	0.276857	1	0.276857	-0.266667	0.34127	0.29903
AMPKin-b1	Nontoxin	Nontoxin	40.63	78.55	39.54	49.99	39.19	40.25	52.53	29.35	46.2537	14.8554	0.321172	FALSE	816	0.245833	0	5	1	1	0	1	5	6	-0.630741	-1.16221	-0.342991	-0.0476451	-0.116667	-0.132467	0.0457159	-0.191688	0.00436973	-0.193939	0.0694446	-0.0073816
AMPKin-g1	Nontoxin	Nontoxin	10.34	27.56	22.86	21.79	13.72	20.7	30.56	30.71	22.28	7.42978	0.333473	FALSE	1005	0.427778	0	3	0	0	0	0	3	3	1.21602		1.21602	0.316389	0.5	0.6	0.6	0	0.303704	0.111111	0.343435	0.474458
AMSyn2	Nontoxin	Nontoxin	18.35	41.89	34.31	25.31	24.94	29.46	28.68	21.91	28.1063	7.38785	0.262854	FALSE
Anaphase11	Nontoxin	Nontoxin	76.51	108.38	91.56	72.76	38.64	103.97	104.6	126.53	90.3687	27.2527	0.301573	FALSE
AndrogenDepTPF1	Nontoxin	Nontoxin	18.37	32.44	12.04	9.16	23.47	0.34	31.27	7.57	16.8325	11.5764	0.68774	FALSE	723	0.313797	0	3	6	6	0	6	3	9	0.115083	-0.22928	0.660881	0.0551725	-0.0591478	-0.15102	0.190524		0.0854702	-0.187475	0.0674538	-0.0265612
AndrogenInd1	Nontoxin	Nontoxin	14.55	25.72	40.44	23.45	18.6	18.73	23.1	15.3	22.4862	8.26298	0.367468	FALSE	717	0.125	0	1	0	0	0	0	1	1	-1.16221		-1.16221	-0.210526			-0.0961538		-0.0961538	-0.4	0	0.0989399
AngIIRec	Nontoxin	Nontoxin	5.84	33.31	8.77	18.9	10.68	33.22	11.8	11.3	16.7275	10.8488	0.648559	FALSE	489	0.445055	0	1	1	1	0	1	1	2	1.18442	0.381009	1.45689	-0.372032	-1.8		-0.476923	-1	-0.18205	-0.153846	-0.049923	0.082768
AnionChan2	Nontoxin	Nontoxin	144.5	265.89	181.56	223.26	131.92	198.44	282.96	215.96	205.561	53.2243	0.258922	FALSE	852	0.20625	0	4	0	0	0	0	4	4	-0.987408		-0.987408	-0.105305	-0.333333	0.0857145	-0.0894737	0.0857145	-0.0894737	-0.444444	0.0416668	0.0925622
AnionChan3	Nontoxin	Nontoxin	53.88	58.86	75.83	48.04	37.58	43.97	52.04	65.42	54.4525	12.1804	0.223689	FALSE	852	0.161111	0	2	1	1	0	1	2	3	-1.34917	-1.16221	-1.03789	-0.140351	0	-0.428571	-0.0652629		-0.0961538	-0.4	-0.047619	-0.0312068
Ankylosis	Nontoxin	Nontoxin	60.81	76.78	71.22	59.29	66.6	60.7	97.29	59.54	69.0288	13.0454	0.188985	FALSE	1482	0.3125	0	2	0	0	0	0	2	2	0.0945699		0.0945699	0.049822	0.1	-0.272727	-0.231214	-0.350649	0.26409	1.11022e-16	0	0.0174334
Ankyrin-46	Nontoxin	Nontoxin	15.72	21.3	20.77	20.53	23.45	13.94	21.44	17.93	19.385	3.22581	0.166408	FALSE	687	0.179167	0	2	2	2	0	2	2	4	-1.26856	-1.03789	-1.03789	0.227903	0	1	0.0381301	0.285714	0.0692797	0.2	0.0416668	0.0626544
AnnexinA1	Nontoxin	Nontoxin	34.3	125.18	278.15	294.67	108.86	69.2	230.15	238.23	172.343	99.8503	0.579371	FALSE	1029	0.32619	0	5	2	2	0	2	5	7	0.290254	0.377685	0.185547	0.209652	-0.111111	0.824561	0.255748	0.473684	0.148773	0.074074	0.251044	0.19037
AnnexinA11	Nontoxin	Nontoxin	19.73	74.78	23.85	55.85	14.54	28.96	31.33	22	33.88	20.7095	0.611261	FALSE	1509	0.263889	0	5	4	4	0	4	5	9	-0.456723	-0.252077	-0.525245	-0.0362383	0.125	0.0818182	-0.0370254	0.0666667	0.0913826	-0.40293	0.0736332	0.0906572
AnnexinA2	Nontoxin	Nontoxin	131.3	291.58	173.86	377.46	107.79	184.56	162.89	270.75	212.524	91.9246	0.432538	FALSE	1020	0.3375	0	3	1	1	0	1	3	4	0.375116	0.155746	0.387675	-0.00345843	-0.5	-0.272727	0.245424	-1.8	0.151982	0.194872	0.123707	0.310002
AnnexinA4-1	Nontoxin	Nontoxin	9.43	38.67	20.91	23.63	12.54	9.85	21.62	10.76	18.4262	10.0083	0.543154	FALSE	960	0.24375	0	3	1	1	0	1	3	4	-0.598115	-1.16221	-0.17346	-0.0117309	-0.0833332	-0.38961	0.0437393	-0.272727	0.16783	0.25641	-0.0230769	0.0666874
AnnexinA5	Nontoxin	Nontoxin	51.68	87.33	133.09	66.84	60.26	73.99	111.91	92.51	84.7013	27.4414	0.323979	FALSE	963	0.283333	0	3	3	3	0	3	3	6	-0.204812	-1.05524	0.708323	-0.0915316	-0.133333	-0.350649	0.005536	-0.324675	-0.0259748	-0.584615	0.037037	0.0254128
AnnexinA6	Nontoxin	Nontoxin	40.43	100.62	40.49	44.46	21.97	27.72	41	67.91	48.075	25.1547	0.523238	FALSE	2022	0.216667	0	12	0	0	0	0	12	12	-1.07361		-1.07361	0.128932	-0.0714286	0.425974	0.127363	-0.116883	0.122923	0.145455	0.0658731	-0.0104689
AnnexinA7	Nontoxin	Nontoxin	14.91	38.88	25.99	25.87	17.77	24.62	36.32	26.83	26.3987	8.1456	0.30856	FALSE	1374	0.280833	0	6	4	4	0	4	6	10	-0.254097	-0.792762	0.189567	0.0814828	-0.0375	-0.0833902	0.189077	-0.440816	0.162452	0.289231	0.0769536	0.112272
AntizymeInh1	Nontoxin	Nontoxin	11.05	36.91	21.98	29.88	19.31	15.78	20.32	37.59	24.1025	9.7155	0.403091	FALSE	1350	0.255208	0	6	2	2	0	2	6	8	-0.552169	-0.648609	-0.409889	0.10678	-0.1	-0.771428	0.176871	-0.350649	0.194641	0.16	0.0892856	0.167974
AP-1-b1	Nontoxin	Nontoxin	26.98	38.59	17.18	31.41	34.3	40.18	30.19	14.38	29.1512	9.33219	0.32013	FALSE	2826	0.270499	0	24	2	2	0	2	24	26	-0.150437	0.814637	-0.280338	-0.0272814	-0.320532		-0.156545	-0.238095	-0.108326	-0.0876069	-0.0255678	-0.0797329
AP-1-mu1	Nontoxin	Nontoxin	20.75	27.15	33.07	22.53	26.65	28.28	59.42	16.62	29.3088	13.1683	0.449296	FALSE	1272	0.179167	0	2	0	0	0	0	2	2	-1.03789		-1.03789	0.0610685	0		0.172414	-0.428571	0.151997	8.88178e-17	0.0833335	0.141876
AP-1-s1A	Nontoxin	Nontoxin	100.87	136.47	91.88	116.32	112.98	146.66	119.7	100.87	115.719	18.597	0.160709	FALSE	477	0.325	0	1	0	0	0	0	1	1	0.155746		0.155746	0.676056	0	0.473684	0.131579	1		1	-0.2	0.0542698
AP-1-s3	Nontoxin	Nontoxin	25.81	20.1	29.93	37.13	34.8	31.41	50.27	16.32	30.7212	10.5917	0.344768	FALSE
AP-2-mu	Nontoxin	Nontoxin	66.28	126.05	86.35	94.01	75.51	90.98	118.63	91.4	93.6512	20.0626	0.214226	FALSE	1302	0.197619	0	7	0	0	0	0	7	7	-1.21301		-1.21301	-0.000687143	0.166667	-0.428571	0.0835456	-0.285714	0.00224347	-0.186667	0.0291006	0.119708
AP-2-sigma	Nontoxin	Nontoxin	77.73	124.01	124.85	113.47	105.87	93.38	170.83	130.92	117.633	27.8654	0.236885	FALSE	429	0.125	0	3	0	0	0	0	3	3	-1.69654		-1.69654	-0.140351	0		-0.0961538	-0.428571	-0.0202429	-0.4	0	0.0446022
AP-3-mu1	Nontoxin	Nontoxin	15.74	41.2	25.05	21.1	17.33	15.03	17.56	17.26	21.2837	8.67185	0.40744	FALSE	1257	0.238636	0	7	4	4	0	4	7	11	-0.786406	-1.83088	0.0257909	0.28135	0.214286	0.215038	0.292564	0.540451	0.246576	-0.0533332	0.137879	0.0383605
AP-3-s1	Nontoxin	Nontoxin	71.49	82.72	108.54	108.11	83.43	72.2	132.3	104.72	95.4387	21.3697	0.22391	FALSE	582	0.197222	0	3	0	0	0	0	3	3	-1.0018		-1.0018	0.428126	0.25	0.163636	0.131579	0.542857	0.555556	0.666667	0.00793667	0.0159383
apolipoproteinO	Nontoxin	Nontoxin	17.35	8.96	8.54	4.64	3.69	6.74	3.25	6.26	7.42875	4.52088	0.608565	FALSE	648	0.3125	0	0	2	2	0	2	0	2	0.0945699	0.0945699		0.290909	0	1	1	-0.714286	0.19079		0.333334	0.161841
ApopInhib5	Nontoxin	Nontoxin	10.63	23.37	15.59	12.97	14.98	22.51	25.81	15.07	17.6163	5.50488	0.312489	FALSE	1572	0.395833	0	3	1	1	0	1	3	4	0.980683	1.03439	0.708323	-0.0777555	-0.5	0.285714	0.172941	-1.26667	-0.0528847	0.0666667	1e-07	0.166885
ApoptosisInh-1	Nontoxin	Nontoxin	16.24	27.12	30.28	20.02	12.97	28.06	23.93	22.84	22.6825	5.98617	0.263911	FALSE	921	0.279166	0	4	4	4	0	4	4	8	-0.265561	-0.749507	0.288607	0.184548	2.5e-07	-0.085714	0.307289	-0.156692	0.175045	0.271795	0.122685	0.221153
Aprataxin	Nontoxin	Nontoxin	19.95	33.44	23.07	24.9	18.46	26.24	17.34	18.73	22.7663	5.3832	0.236455	FALSE	1053	0.198611	0	3	3	3	0	3	3	6	-1.1671	-0.627713	-1.34917	0.0211993	0	0.6	0.123017	-0.38961	0.0600264	0.0777778	0.00396833	0.101326
Aquaporin1	Nontoxin	Nontoxin	44.45	54.13	40.25	14.59	16.92	29.95	64.8	55.05	40.0175	18.2851	0.456928	FALSE	810	0.19	0	5	0	0	0	0	5	5	-1.21781		-1.21781	-0.17171	0	-0.619047	-0.0291578		-0.130769	-0.6	-0.0285714	-0.00730126
Aquaporin3	Nontoxin	Nontoxin	6.45	16.38	8.47	31.25	4.42	11.51	20.34	11.36	13.7725	8.74674	0.635087	FALSE	879	0.227778	0	2	1	1	0	1	2	3	-0.707875	-1.16221	-0.188546	-0.0468975	-0.111111	-0.428571	0.0289823	-0.428571	0.151997	8.88178e-17	0.0333334	0.0192581
Aquaporin5	Nontoxin	Nontoxin	201.21	188.26	159.61	139.04	56.76	101.66	171.73	129.69	143.495	47.6226	0.331876	FALSE	786	0.271428	0	5	2	2	0	2	5	7	-0.350025	-0.57783	-0.160737	0.0069194	-0.166667	-0.618553	0.122876	-0.105974	0.132731	0.444445	0.00680286	0.00836661
Aralar1	Nontoxin	Nontoxin	19.33	31.75	26.98	28.16	17.84	20.88	27.01	15.28	23.4037	5.83085	0.249142	FALSE	2028	0.154487	0	13	0	0	0	0	13	13	-1.8796		-1.8796	-0.000830462	0	-0.27619	0.128763	-0.314285	0.119534	-0.266667	0.0384615	-0.0154559
Archease	Nontoxin	Nontoxin	47.55	125.29	91.68	131.33	83.27	125.79	131.12	86.21	102.78	30.433	0.296099	FALSE	501	0.142857	0	1	0	0	0	0	1	1	-1.0535		-1.0535	-0.367133			-0.4		-0.0961538	-0.4	-0.044586	0.0569106
Arfaptin1	Nontoxin	Nontoxin	18.68	25.24	32.66	23.43	18.01	22.75	16.08	17.37	21.7775	5.47423	0.251371	FALSE	1122	0.125	0	2	1	1	0	1	2	3	-1.69654	-1.16221	-1.49796	-0.0701753	0		-0.0961538	-0.428571	0.0556681	-0.4	0	-0.0097355
Arfaptin2	Nontoxin	Nontoxin	22.79	32.7	11.65	37.92	37.7	69.51	55.8	32.38	37.5562	18.1012	0.481977	FALSE	1017	0.308691	0	11	0	0	0	0	11	11	0.881483		0.881483	0.397964	0.190118		0.609524	0.319012	0.41012	-0.266667	0.436704	0.261433
Arginyl-tRNASyn	Nontoxin	Nontoxin	40.81	51.36	77.25	39.47	42.6	40.6	64.47	51.9	51.0575	13.5589	0.265562	FALSE	1992	0.17963	0	3	6	6	0	6	3	9	-1.48358	-1.27752	-1.34917	-0.0440602	0	-0.142857	0.0569639	-0.428571	-0.0061812	-0.266667	0.0455841	0.0820196
ArgNMeT1	Nontoxin	Nontoxin	65.37	160.89	110.38	73.74	47.36	57.02	132.49	224.37	108.953	61.1844	0.56157	FALSE	1056	0.302083	0	6	2	2	0	2	6	8	0.00858635	-0.57783	0.268442	0.454405	0.285714	0.736842	0.767849	0.102041	0.46509	0.444444	0.292361	0.200866
Arrestin-b2	Nontoxin	Nontoxin	11.66	13.64	6.07	12.23	9.62	13.8	11.73	17.84	12.0738	3.40299	0.28185	FALSE	1230	0.303297	0	3	2	2	0	2	3	5	-0.0104696	-1.35784	1.00989	0.206503	-0.376623		0.592593	-0.171428	0.342081	0.222222	0.292772	0.263874
ArylacetamideDeacetylase	Nontoxin	Nontoxin	10.73	14.07	24.07	32.78	7.8	31.54	35.14	13.01	21.1425	11.0236	0.521396	FALSE	1212	0.335	0	1	4	4	0	4	1	5	0.367801	0.18047	0.649981	0.244166	0	0.124675	0.396339	0.4	0.415871	0.0333335	0.328446	0.325689
AspAminoTrans1	Nontoxin	Nontoxin	20.17	30.68	54.24	23.98	34.72	39.59	40.88	11.64	31.9875	13.4112	0.419263	FALSE	1245	0.194444	0	3	3	3	0	3	3	6	-1.21442	-1.34917	-0.707875	0.116848	0	0.185715	0.0278836	0.8	-0.0412466	-0.127777	0.0648148	0.0196386
Aspartyl-tRNASyn	Nontoxin	Nontoxin	41.15	62.17	62.92	41.94	34.02	47.02	58.06	68.52	51.975	12.5317	0.241111	FALSE	1512	0.2	0	6	2	2	0	2	6	8	-1.21261	0.200738	-1.62458	0.153074	-0.0714286	-0.0424058	0.284231	-0.114285	0.328947	0.666667	0.134921	0.0287251
AspDipeptidase	Nontoxin	Nontoxin	67.96	45.58	73.72	44.05	44.42	53.11	69.1	58.13	57.0088	12.0646	0.211626	FALSE	738	0.191667	0	1	2	2	0	2	1	3	-1.05524	-1.49796	0.155746	0.0850013	0	1	-0.0961538	0.473684	-0.0202429	0.0666667	-0.0666667	0.0840499
AspSyn	Nontoxin	Nontoxin	78.77	96.23	54.14	35.97	58.11	25.33	50.23	70.44	58.6525	22.9042	0.390506	FALSE	1686	0.228333	0	4	1	1	0	1	4	5	-0.798627	-1.16221	-0.489978	0.273684		1	0.177885	1	0.177885	-0.05	0.2	0.169119
AsptRNASyn	Nontoxin	Nontoxin	52.72	119.26	54.63	53.29	66.2	77.55	85.57	39.5	68.59	25.2666	0.368372	FALSE	1680	0.165625	0	6	2	2	0	2	6	8	-1.62384	-1.03789	-1.59303	0.136548	0.0333334	0.257143	-0.0202429	-0.0122447	0.103821	0.133333	0.0238096	-0.021744
ATOX1	Nontoxin	Nontoxin	41.4	41.94	184.19	46.37	15.44	90.61	78.06	75.13	71.6425	51.6504	0.720946	FALSE	207	0.391666	0	2	0	0	0	0	2	2	0.766969		0.766969	-0.188017	-0.25	-1.8	0.007467	-0.350649	-0.203712	9.99199e-17	-0.104762	0.0080588
ATPase-ASNA1	Nontoxin	Nontoxin	20.28	22.06	39.37	31.93	30.85	43.96	44.28	26.17	32.3625	9.40049	0.290475	FALSE	1047	0.161111	0	2	1	1	0	1	2	3	-1.34917	-1.16221	-1.03789	-0.216009	0	-0.428571	-0.0548583		-0.148077	-0.7	0	0.0746852
ATPase-lys70	Nontoxin	Nontoxin	34.2	37.09	33.97	51.72	36.03	43.69	87.81	31.61	44.515	18.6636	0.419266	FALSE	1854	0.221875	0	15	1	1	0	1	15	16	-1.04001	-1.16221	-0.949322	0.106751	-0.025641	-0.192857	0.227001	-0.314285	0.179803	0.244689	0.0692189	0.0967384
ATPaseCaPm1	Nontoxin	Nontoxin	66.11	33.85	69.76	34.4	64.09	31.02	60.84	85.53	55.7	20.1172	0.36117	FALSE	3660	0.277381	0	3	4	4	0	4	3	7	-0.280429	0.0723332	-0.627713	0.355688	-0.125	0.3	0.532277	0.207519	0.379169	0.4	0.222449	0.157985
ATPaseV1-G3	Nontoxin	Nontoxin	554.29	615.3	1140.97	779.95	527.25	1047.95	1568.44	783.28	877.179	356.601	0.406532	FALSE	357	0.179167	0	1	1	1	0	1	1	2	-1.03789	-1.16221	-0.448318	0.0070965	0	-0.272727	0.0177126	0.6	-0.0961538	0.133333	-0.0714285	0.077442
ATPBindCassetteF2	Nontoxin	Nontoxin	26.39	23.66	13.58	24.54	34.67	49.85	33.82	26.97	29.185	10.6029	0.363299	FALSE	1890	0.231061	0	15	1	1	0	1	15	16	-0.556989	-0.912045	-0.458625					-0.214285	-0.038513	-0.304142	-0.121971	0.0571429
ATPBindingD3	Nontoxin	Nontoxin	9.78	21.92	16.25	20.16	13.22	11.71	29.66	21.58	18.035	6.56656	0.364101	FALSE	1989	0.275724	0	9	2	2	0	2	9	11	-0.354373	-0.84939	-0.150209	0.0780022	-0.219685		0.301832	-0.312987	0.00159291	0.0542126	0.0490485	0.0504337
ATPBindingE1	Nontoxin	Nontoxin	98.51	54.3	116.59	54.31	60.33	66.6	112.51	124.44	85.9487	30.0407	0.349518	FALSE	1800	0.238333	0	6	0	0	0	0	6	6	-1.31182		-1.31182	0.034898	0	0.45	0.141788	0.2	0.133448	-0.327273	0.166667	0.0995912
ATPSyn-a	Nontoxin	Nontoxin	98.43	114.01	55.15	124.18	73.93	125.63	125.29	99.1	101.965	26.0247	0.255231	FALSE	1662	0.325379	0	21	1	1	0	1	21	22	0.322929	-1.16221	0.449637	0.119279	-0.0470588	-0.327555	0.0744329	-0.0187467	0.2504	0.215873	0.0584422	0.115352
ATPSyn-b1	Nontoxin	Nontoxin	221.28	364.65	220.77	393.17	208.47	287.61	288.77	256.02	280.092	68.406	0.244226	FALSE	1593	0.263736	0	1	0	0	0	0	1	1	-0.264521		-0.264521	-0.789474			-1		-0.2	-1	-0.0909091	0.111111
ATPSyn-b2	Nontoxin	Nontoxin	140.44	187.46	246.64	154.88	138.39	199.58	251.8	171.08	186.284	44.282	0.237712	FALSE	768	0.251389	0	3	3	3	0	3	3	6	-0.567641	-1.34917	0.387675	-0.0160946	0	0.8	0.0851519	0.100478	-0.0396518	-0.163636	0.102002	0.0864161
ATPSyn-d	Nontoxin	Nontoxin	265.09	293.58	415.58	234.52	183.4	172.44	294.96	357.6	277.146	82.7546	0.298595	FALSE	486	0.258333	0	1	2	2	0	2	1	3	-0.413947	0.200738	-1.16221	0.187465	0	0.285714	0.263245	1	0.329078	-0.4	0.285714	0.16173
ATPSyn-e	Nontoxin	Nontoxin	644.13	480.59	556.96	339.69	201.99	384.5	561.23	418.98	448.509	142.1	0.316828	FALSE	213	0.125	0	3	0	0	0	0	3	3	-1.69654		-1.69654	-0.140351	0		-0.0961538	-0.428571	-0.0202429	-0.4	0	0.0446022
ATPSyn-eps	Nontoxin	Nontoxin	667.57	538.96	829.38	558.63	427.06	537.49	551.46	608.97	589.94	118.358	0.200628	FALSE	156	0.525	0	1	0	0	0	0	1	1	1.4737		1.4737	0.136519	0	0	0.136187	-0.272727	0.396601	1.11022e-16	0.185185	0.263067
ATPSyn-f	Nontoxin	Nontoxin	681.77	552.37	841.56	449.15	321.21	404.25	622.35	884.55	594.651	202.606	0.340713	FALSE	270	0.233333	0	1	0	0	0	0	1	1	-0.448318		-0.448318	-0.4375			-0.2		-0.2	-1	0	0.189189
ATPSyn-g	Nontoxin	Nontoxin	437.91	348.29	298.23	312.8	217.43	185.58	315.11	368.02	310.421	80.5464	0.259474	FALSE
ATPSyn-s	Nontoxin	Nontoxin	20.72	85.29	44.68	52.7	29.81	38.95	49.64	44.61	45.8	19.1091	0.417229	FALSE	603	0.370833	0	4	0	0	0	0	4	4	0.721154		0.721154	0.212026	-0.166667	0.385281	0.363144	0.0245613	0.203937	0.17094	0.252796	0.207518
ATPSynLipid-1	Nontoxin	Nontoxin	117.02	238.58	177.26	189.03	105.67	141.13	205.46	243.71	177.232	52.3298	0.295261	FALSE
ATPSynLipid-2	Nontoxin	Nontoxin	255.07	206.13	245.17	235.24	172.44	202.68	216.17	264.54	224.68	30.8759	0.137422	FALSE	432	0.125	0	0	1	1	0	1	0	1	-1.16221	-1.16221		0	0	-0.428571	0.131579				0	-0.0640732
ATPSynLipid-4	Nontoxin	Nontoxin	65.39	52.47	96.07	39.4	32.23	21.42	59.47	34.24	50.0863	23.7497	0.474177	FALSE	408	0.125	0	1	0	0	0	0	1	1	-1.16221		-1.16221	0.54902		0.6		0.6		0.666667	0	-0.0640732
ATPSynO	Nontoxin	Nontoxin	321.98	262.7	488.38	246.27	162.78	225.15	322.31	315.54	293.139	96.3941	0.328835	FALSE	639	0.458333	0	0	1	1	0	1	0	1	1.03439	1.03439		0.510638	0	0.428571	0.555556	0.473684	0.131579	1	-0.142857	0.367246
AuroraKin	Nontoxin	Nontoxin	34	34.81	31.1	37.3	30.1	31.12	34.47	48.81	35.2137	5.99085	0.170128	FALSE	633	0.271667	0	2	3	3	0	3	2	5	-0.324765	0.654882	-1.49796	0.411384	0.222222	-0.6	0.502155	0.311278	0.542692	0.666667	0.111111	0.166479
Autophagy101	Nontoxin	Nontoxin	19.47	63.24	28.23	47.17	20.25	28.42	40.05	32.56	34.9238	14.7594	0.422619	FALSE	657	0.125	0	1	0	0	0	0	1	1	-1.16221		-1.16221	0	0			-0.428571	0.131579		0	-0.0640732
Autophagy5	Nontoxin	Nontoxin	16.47	30.35	17.94	17.32	20.42	23.94	52.25	24.95	25.455	11.7911	0.463215	FALSE	828	0.254167	0	4	2	2	0	2	4	6	-0.53609	-1.49796	0.18047	-0.121519	-0.333333	-0.282467	0.0564361	-1.02424	0.00635828	-0.0333333	0.0259259	0.0779232
AWP1	Nontoxin	Nontoxin	9.6	21.03	14.66	21.85	10.64	11.04	19.34	14.1	15.2825	4.8735	0.318894	FALSE	858	0.275	0	4	1	1	0	1	4	5	-0.288315	0.155746	-0.403469	-0.0335522	-0.075	-0.619047	0.0135528	-0.508772	0.200112	-0.4	0.0777778	-0.0321452
BAG3	Nontoxin	Nontoxin	24.8	48.19	25.37	24.99	20.48	25.11	35.1	21.97	28.2512	9.14191	0.323593	FALSE	1707	0.26282	0	5	8	8	0	8	5	13	-0.493261	-0.639398	-0.160737	0.0478611	-0.0272727	-0.261462	-0.0293978	0.0122451	0.165676	0.0856061	0.00522682	0.0471468
Band5	Nontoxin	Nontoxin	11.23	22.14	11.02	29.22	12.97	18.55	19.85	18.4	17.9225	6.17274	0.344413	FALSE	1512	0.234167	0	4	6	6	0	6	4	10	-0.83162	-0.662291	-0.836016	0.079658	0	0.0857145	0.2055	-0.337143	0.0203012	0.0542126	0.0507692	0.150746
BarrierAutointegration	Nontoxin	Nontoxin	132.99	296.79	141.35	231.77	135.35	279.44	247.62	175.68	205.124	67.0258	0.326758	FALSE	270	0.125	0	1	1	1	0	1	1	2	-1.49796	-1.16221	-1.16221	-0.105263	0		-0.0961538	-0.428571	0.0177126	-0.4	0	0.0174334
Basigin	Nontoxin	Nontoxin	61.34	130.6	63.13	83.8	94.32	138.37	95.79	54.53	90.235	31.3499	0.347425	FALSE	816	0.221667	0	3	2	2	0	2	3	5	-0.871529	-1.49796	-0.14674	-0.070425	0	-1.11429	-0.0900857	0.0857145	0.10298	-0.4	0.0166667	0.0324235
BAT1	Nontoxin	Nontoxin	28.51	65.24	46.83	36.81	22.88	59.37	61.2	62.38	47.9025	16.6686	0.34797	FALSE	1287	0.179167	0	2	0	0	0	0	2	2	-1.03789		-1.03789	0	0	-1	0.25	-0.428571	0.131579		0	-0.0980741
Battenin	Nontoxin	Nontoxin	15.14	31.92	28.38	5.6	19.21	16.5	25.83	13.05	19.4537	8.75107	0.44984	FALSE	1356	0.286905	0	5	2	2	0	2	5	7	-0.169077	-0.188546	-0.124286	0.0948957	0	0.291428	0.152358	-0.6	0.150816	-0.162393	0.0946713	0.0510796
BaxInh1	Nontoxin	Nontoxin	221.89	389.68	309.23	325.81	197.85	237.36	463.93	283.17	303.615	89.6861	0.295394	FALSE	711	0.247917	0	3	1	1	0	1	3	4	-0.554861	-0.448318	-0.467388	0.0665798	-0.166667	-0.542857	0.184664	-0.272727	0.145191	0.444445	-0.00045775	0.138517
BCAminotransferase	Nontoxin	Nontoxin	88.96	64.77	48.45	38.87	37.55	36.72	47.07	29.23	48.9525	19.3645	0.395576	FALSE	1179	0.282407	0	7	2	2	0	2	7	9	-0.231041	-1.03789	0.123225	0.30894	-0.125	0.285714	0.389903	-0.2	0.403751	0.4	0.228395	0.191288
BCell31	Nontoxin	Nontoxin	187.6	325.3	334.79	358.89	176.69	334.81	209	184.53	263.951	80.7001	0.305739	FALSE	744	0.202083	0	3	1	1	0	1	3	4	-1.03066	0.155746	-1.34917	-0.000187475	-0.111111	-0.428571	0.155747	-0.428571	0.155747	-0.153846	0.0972222	0.10016
BCellRec29	Nontoxin	Nontoxin	18.98	61.67	42.79	44.8	32.43	40.17	56.42	45.2	42.8075	13.2729	0.31006	FALSE	732	0.125	0	1	0	0	0	0	1	1	-1.16221		-1.16221	0	0			-0.428571	0.131579		0	-0.0640732
Bcms1	Nontoxin	Nontoxin	13.83	23.44	16.73	27.41	13.97	21.15	17.85	19.93	19.2888	4.68687	0.242985	FALSE	978	0.297917	0	10	2	2	0	2	10	12	-0.0437171	0.554633	-0.212845	0.263426	0.0185186	0.188572	0.408142	0.221053	0.297709	-0.0833332	0.289863	0.168715
Beclin1	Nontoxin	Nontoxin	29.93	37.18	44.98	15.72	30.06	13.89	31.49	26.18	28.6788	10.2974	0.359061	FALSE	1347	0.525	0	1	0	0	0	0	1	1	1.4737		1.4737	0.484305	0	0.6	1	-1.8	0.25	0.666667	0.454545	0.55997
BEN7	Nontoxin	Nontoxin	16.05	41.15	19.93	24.69	21.51	25.21	43.07	13.03	25.58	10.9939	0.429786	FALSE	1278	0.230555	0	7	5	5	0	5	7	12	-0.89756	-0.0696093	-1.36612	0.0732717	0.04	0.21974	0.173783	-0.129004	0.0852766	-0.0181817	0.100318	0.126636
BET1	Nontoxin	Nontoxin	39.72	35.87	54.76	28.81	28.41	34.01	55.84	37.56	39.3725	10.5839	0.268813	FALSE	336	0.316667	0	0	2	2	0	2	0	2	0.129959	0.129959		-0.145531	0	-0.428571	-0.157967	-0.428571	-0.013566	-0.276923	-0.084249	0.042943
BetaCentractin	Nontoxin	Nontoxin	16.04	24.79	31.24	14.98	25.22	24.31	27.48	13.33	22.1737	6.53153	0.294561	FALSE	1131	0.259167	0	9	1	1	0	1	9	10	-0.522232	-0.448318	-0.479292	0.239441	0.12381	-0.261039	0.138348	0.654737	0.453716	0.2	0.151095	0.141726
Bifunctional	Nontoxin	Nontoxin	42.53	96.27	15.6	33.44	35.86	27.41	20.93	31.33	37.9212	25.0457	0.660467	FALSE	1050	0.35	0	4	0	0	0	0	4	4	1.09132		1.09132						0.142857		0.142857	0.142857
Bifunctional-PURH	Nontoxin	Nontoxin	16.92	29.28	25.79	27.26	10.67	18.52	26.03	38.65	24.14	8.60351	0.3564	FALSE	1782	0.261111	0	2	1	1	0	1	2	3	-0.387226	-1.16221	0.236128	0.263158	0	1	0.451923	0.285714	0.345142	-0.4	0.333333	0.238573
Bifunctional2	Nontoxin	Nontoxin	14.56	27.69	22	18.02	18.37	14.98	31.02	18.55	20.6488	5.91225	0.286325	FALSE	1845	0.3125	0	4	0	0	0	0	4	4	0.115588		0.115588	0.210443	0	-0.428571	0.207157		0.470822	0.311111	0.149123	0.344429
Biglycan	Nontoxin	Nontoxin	16.27	79.75	39.82	17.89	35.68	70.14	29.13	41.66	41.2925	22.887	0.554264	FALSE	1107	0.458333	0	2	0	0	0	0	2	2	1.3332		1.3332	0.342276	0.1	0.473684	0.26409	0	0.162171	0.3	0.011905	0.15873
Biogenesis	Nontoxin	Nontoxin	73.99	101.47	19.73	65.01	36.39	57.13	78.62	61.1	61.68	25.2226	0.408927	FALSE
Biogenesis10	Nontoxin	Nontoxin	5.62	15.76	13.44	19.83	8.96	15.86	18.26	13.92	13.9563	4.69991	0.336761	FALSE	984	0.42803	0	3	1	1	0	1	3	4	1.21618	1.43099	0.806299					-0.428571	0.344311	0.288889	0.105258	0.435796
BiPGlyMutase	Nontoxin	Nontoxin	7.46	21.28	10.51	29.44	8.27	6.5	5.43	2.92	11.4762	9.10795	0.793635	FALSE	783	0.268132	0	9	1	1	0	1	9	10	-0.442886	-0.264521	-0.43024	0.0332877	-0.0375	-0.0766916	0	-0.422127	0.0952381	0.52381	-0.0268232	-0.113397
BladderCancer	Nontoxin	Nontoxin	16.07	24.08	20.79	18.66	23.81	27.64	27.89	32.78	23.965	5.44069	0.227026	FALSE
boIA2	Nontoxin	Nontoxin	112.96	89.52	133.43	51.33	98.36	70.48	147.1	68.3	96.435	33.2949	0.345258	FALSE
BrainAngioInh1	Nontoxin	Nontoxin	30.1	97.44	39.36	76.64	40.48	57.09	35.16	43.36	52.4537	23.3804	0.445734	FALSE	1515	0.210714	0	10	4	4	0	4	10	14	-1.16975	-1.03066	-1.07913	0.116252	0	-1.38778e-17	-0.0019588	0.198496	0.0273378	0.0743803	0.000846007	0.0102018
BrainI3	Nontoxin	Nontoxin	11.53	35.38	13.74	29.64	12.53	30.02	17.08	33.66	22.9475	10.1575	0.442641	FALSE	390	0.330357	0	4	0	0	0	0	4	4	1.05569		1.05569						-0.333333		-0.333333	-0.333333
BRCC36	Nontoxin	Nontoxin	14.57	41.69	30.67	40.09	24.41	40.35	31.32	25.21	31.0388	9.49754	0.30599	FALSE	786	0.538462	0	1	0	0	0	0	1	1	1.52862		1.52862	0.896341			1	0.6	1	0.666667	0.835507	0.835507
BRICK1	Nontoxin	Nontoxin	57.28	77.4	57.09	59.68	49.65	104.87	92.05	45.92	67.9925	21.2252	0.31217	FALSE	228	0.125	0	1	0	0	0	0	1	1	-1.16221		-1.16221	0	0			-0.428571	0.131579		0	-0.0640732
BRISC	Nontoxin	Nontoxin	23.87	24.25	14.6	39.99	23.63	32.3	30.46	66.48	31.9475	15.83	0.495501	FALSE	993	0.166667	0	4	2	2	0	2	4	6	-1.19594	-0.928893	-1.05204						-0.0506072		-0.0506072	-0.0506072
Bromodomain7	Nontoxin	Nontoxin	26.09	40.53	36.58	39.78	25.3	32.15	40.76	43.72	35.6138	7.00743	0.196762	FALSE	1962	0.211111	0	7	5	5	0	5	7	12	-1.14403	-1.69167	-0.517054	0.071826	0	0.6	-0.0400425	0.105195	-0.0517325	-0.0400931	0.0104498	0.0589816
BTG1	Nontoxin	Nontoxin	19.68	76.73	15.02	27.42	17.33	37.08	24.27	71.94	36.1838	24.5467	0.678391	FALSE	471	0.142857	0	1	0	0	0	0	1	1	-1.0535		-1.0535	0.552632				0.6		0.666667	-0.044586	-0.044586
BTG2	Nontoxin	Nontoxin	66.7	27.03	25.95	14	77.28	21.71	40.38	23.4	37.0562	22.9447	0.619186	FALSE	510	0.233333	0	1	0	0	0	0	1	1	-0.448318		-0.448318	0.510638	0.5	0.428571	0.555556				0.166667	0.0559441
BUD31	Nontoxin	Nontoxin	71.51	109.61	121.19	104.89	101.94	127.66	169.48	85.27	111.444	29.6228	0.265809	FALSE
Bystin	Nontoxin	Nontoxin	18.22	38.36	29.33	32.52	28.23	37.61	53.1	24.98	32.7937	10.5076	0.320416	FALSE	1332	0.288889	0	3	3	3	0	3	3	6	-0.141712	0.57472	-0.814758	0.107198	-0.0833332	-0.619047	0.125401	0.0476193	0.275401	-0.0364673	0.156746	0.183762
c-Myc	Nontoxin	Nontoxin	45.22	20.28	6.11	150.65	73.08	55.56	68.31	94.63	64.23	45.093	0.702055	TRUE
C11orf67	Nontoxin	Nontoxin	40.79	74.17	48.85	76.77	27.94	63.48	65.5	114.9	64.05	26.534	0.41427	FALSE	369	0.282291	0	6	2	2	0	2	6	8	-0.228177	-1.49796	0.378868	0.32246	-0.125	0.780451	0.184434	0.0204083	0.0913925	0.488889	0.0958332	-0.0365771
C11orf73	Nontoxin	Nontoxin	66.27	85.67	90.24	83.36	65.53	74.64	91.46	85.48	80.3313	10.2498	0.127594	FALSE	594	0.325	0	3	0	0	0	0	3	3	0.22735		0.22735	0.080048	-0.25	-0.285714	0.236467	-0.428571	0.259204	0.3	0.111111	0.256767
C12orf23	Nontoxin	Nontoxin	31.76	28.34	48.98	16.72	9.3	18.73	28.06	23.47	25.67	11.9186	0.4643	FALSE
C12orf73	Nontoxin	Nontoxin	33.87	18.64	19.91	24.97	30.88	0	14.64	14.31	19.6525	10.6734	0.543106	FALSE	207	0.302083	0	1	3	3	0	3	1	4	0.00745111	-0.0665776	0.155746	0.401676	0.222222	0.736842	0.36686	0.0225565	0.118303	0.333333	0.0531745	0.13787
C14orf166	Nontoxin	Nontoxin	92.71	125.61	124.75	92.28	66.94	71.14	162.4	188.34	115.521	43.2228	0.374155	FALSE	738	0.229166	0	4	0	0	0	0	4	4	-0.749507		-0.749507	-0.0851507		0.6	-0.0549734	0.6	-0.0549734	-0.395454	0.125	0.0563863
C15orf40	Nontoxin	Nontoxin	16.02	12.95	52.33	14.24	12.73	17.85	48.83	12.76	23.4637	16.8567	0.718413	FALSE	360	0.244444	0	2	4	4	0	4	2	6	-0.646516	-1.54972	1.08547	-0.0784829	-0.222222	-0.085714	-0.0411401	-0.171428	-0.130748	-0.226667	0.00462972	0.0699776
C16orf80	Nontoxin	Nontoxin	28.76	50.03	28.18	43.47	35.7	41.85	40.34	50.54	39.8588	8.54945	0.214494	FALSE	582	0.319444	0	3	0	0	0	0	3	3	0.173909		0.173909	0.354031	0.444445	0.473684	0.569395	-1	0.0769231	-0.4	0.065527	-0.0858601
C16orf87	Nontoxin	Nontoxin	8.03	20.1	16.06	22.6	6.72	16.03	17.26	13.77	15.0712	5.47297	0.36314	FALSE	465	0.233333	0	1	0	0	0	0	1	1	-0.448318		-0.448318	-0.210526	0		-0.0961538	-0.428571	-0.231214	-0.4	-0.142857	-0.128487
C17orf37	Nontoxin	Nontoxin	75.02	89.89	157.5	43.38	108.07	59.03	129.3	67.45	91.205	38.324	0.420197	FALSE	339	0.302778	0	3	0	0	0	0	3	3	0.0135846		0.0135846	0.169605	0	-0.085714	0.153907	0.6	0.366886	0.131313	0.166667	0.161369
C18orf32	Nontoxin	Nontoxin	52.96	108.34	46.07	78.64	68.57	46.04	139.89	102.85	80.42	33.9724	0.422437	FALSE	288	0.5125	0	0	2	2	0	2	0	2	1.79326	1.79326		0.952675		0.6	1	0.6	1	0.833333	0.761905	0.929906
C19orf60	Nontoxin	Nontoxin	40.14	110.46	66.85	54.48	29.05	68.99	45.22	37.92	56.6388	25.8356	0.456147	FALSE	444	0.238095	0	3	4	4	0	4	3	7	-0.73976	-0.295332	-1.05524	-0.12938	0	-1.11429	-0.0646307	0.6	0.0313784	-0.458974	0.0436508	0.141023
C1orf123	Nontoxin	Nontoxin	27.57	35.91	32.33	32.96	24.66	32.04	31.83	51.86	33.645	8.1295	0.241626	FALSE	483	0.125	0	1	0	0	0	0	1	1	-1.16221		-1.16221	0	0	-0.428571	0.131579				0	-0.0640732
C1orf163	Nontoxin	Nontoxin	14.81	16.67	23.68	12.04	11.69	10.46	21.92	17.05	16.04	4.8097	0.299857	FALSE	696	0.197222	0	1	2	2	0	2	1	3	-1.0018	-1.03789	-0.448318	0.666667	0	1		0.52381	0.131579	1	0	-0.109408
C1orf31	Nontoxin	Nontoxin	30.33	31.59	42.53	37.74	32.52	38.53	45.46	43.32	37.7525	5.78521	0.153241	FALSE	240	0.233333	0	0	1	1	0	1	0	1	-0.448318	-0.448318		0.122137			0.172414		0.172414	8.88178e-17	0.166667	0.347826
C1orf43-2	Nontoxin	Nontoxin	19.37	17.86	5.42	29.87	17.36	28.77	23.07	24.84	20.82	7.80406	0.374835	FALSE	843	0.270329	0	3	2	2	0	2	3	5	-0.367539	0.0750695	-0.595539	0.0348762	-0.314285		0.222222	-0.314285	0.195672	0.222222	0.09214	0.0733812
C20orf24	Nontoxin	Nontoxin	10.27	15.74	15.71	21.23	11.06	19.12	33.13	17.71	17.9963	7.16097	0.397915	FALSE
C20orf30	Nontoxin	Nontoxin	29.37	48.57	56.88	46.92	39.18	30.75	39.53	31.11	40.2888	9.88566	0.24537	FALSE	360	0.216667	0	2	1	1	0	1	2	3	-0.814758	-1.16221	-0.330104	0.109752	0	0.163636	-0.136182	0.6	0.0381301	0.028283	0.025641	-0.00906967
C20orf4	Nontoxin	Nontoxin	4.99	14.06	12.84	9.63	18.98	10.8	19.38	16.79	13.4337	4.94007	0.367736	FALSE	1155	0.302381	0	1	6	6	0	6	1	7	0.0118718	-0.173262	0.649981	0.230333	0.1	-0.5	0.27365	-0.203007	0.392661	0.555555	0.114035	0.129888
C20orf43	Nontoxin	Nontoxin	35.09	54.74	70.85	50.56	19.07	48.73	60.8	35.69	46.9413	16.4084	0.349553	FALSE	918	0.20463	0	6	3	3	0	3	6	9	-1.17891	-1.69654	-0.646516	-0.0416017	-0.074074	-0.222857	0.0694742	-0.406308	0.0374149	-0.167832	0.0111926	-0.0389601
C20orf72	Nontoxin	Nontoxin	9.3	5.83	16.38	15.29	16.78	13.82	15.89	14.05	13.4175	3.86908	0.288361	FALSE	1008	0.398148	0	4	5	5	0	5	4	9	1.17948	0.586507	1.56462	-0.120855	-0.0851851	-0.291562	-0.145412	-0.107143	-0.0256547	-0.617949	0.0176976	-0.0329117
C21orf59	Nontoxin	Nontoxin	13.25	40.57	31.75	32.19	19.33	23.76	19.88	19.1	24.9787	9.04318	0.362035	FALSE	873	0.2	0	2	3	3	0	3	2	5	-1.10846	-1.69654	0.0945699	-0.062111	0	0	-0.0151822	-0.428571	-0.0015952	-0.133333	-0.0133333	0.0194074
C22orf25	Nontoxin	Nontoxin	16.14	32.06	23.05	27.54	15.05	22.68	41.27	34.77	26.57	9.12946	0.3436	FALSE	831	0.270454	0	10	1	1	0	1	10	11	-0.387517	-1.16221	-0.202532	0.0262407	-0.0416666	-0.257142	0.104698	-0.531428	0.106711	0.0569801	0.00726745	0.135756
C22orf28	Nontoxin	Nontoxin	19.22	36.23	54.37	30.02	44.73	38.92	64.06	21.63	38.6475	15.4798	0.400538	FALSE	1518	0.143056	0	6	0	0	0	0	6	6	-1.7981		-1.7981	-0.016501	0	0.6	-0.148077	-0.171428	0.0197166	-0.244444	0	0.00530602
C2orf54	Nontoxin	Nontoxin	29.97	10.59	22.5	12.07	10.93	17.47	24.83	10.72	17.385	7.56393	0.435084	FALSE	1323	0.211458	0	5	3	3	0	3	5	8	-1.07554	-0.814758	-1.01733	-0.0248537	-0.0714286	-0.05974	0.0652632	-1.07532	0.112632	0.25	-0.0460622	0.0321854
C2orf64	Nontoxin	Nontoxin	188.22	161.53	239.07	137.52	124.12	170.78	223.03	135.21	172.435	41.9353	0.243195	FALSE	228	0.233333	0	0	1	1	0	1	0	1	-0.448318	-0.448318		0.122137		0.6	-0.0961538	0.6	-0.0961538	1.11022e-16	0.166667	-0.128487
C3HC4ZF	Nontoxin	Nontoxin	12.05	17.65	17.76	18.28	8.45	15.32	17.05	34.21	17.5963	7.52528	0.427664	FALSE	690	0.319444	0	2	1	1	0	1	2	3	0.173909	-0.448318	0.519243	0.273075	0.1	0.0225565	0.348727	0	0.286516	8.88178e-17	0.305556	0.247574
C3orf19-2	Nontoxin	Nontoxin	14	33.81	22.36	28.93	14.53	21.35	34.38	33.56	25.365	8.48668	0.334582	FALSE	1416	0.184259	0	3	6	6	0	6	3	9	-1.42716	-1.37217	-1.05524	0.131756	0	0.0122451	0.0760818	0.6	0.135366	0.13266	0.0555556	0.0472995
C3orf26	Nontoxin	Nontoxin	6.43	11.01	12.22	7.16	9.16	11.92	12.95	16.77	10.9525	3.34725	0.305615	FALSE	855	0.45	0	2	1	1	0	1	2	3	1.42978	1.30896	1.05009	0.240552	-0.166667	-0.809524	0.16304	-0.428571	0.546733	0.666667	0.185835	0.392006
C3orf32	Nontoxin	Nontoxin	10.42	35.41	22.74	17.28	5.33	29.01	12.94	13.9	18.3788	10.0468	0.546652	FALSE	1113	0.161111	0	5	1	1	0	1	5	6	-1.59303	-0.448318	-1.69167	0.168275	0	0.0857145	0.0242597	0.257143	0.0692797	0.233333	0.00396833	-0.00615897
C3orf78	Nontoxin	Nontoxin	53.68	101.86	80.32	54.31	24.28	35.26	83.51	37.32	58.8175	27.2066	0.462559	FALSE	210	0.3625	1	0	1	1	1	2	0	2	0.519243	0.519243		0.232765	-0.5	0	0.25	-0.263158	0.19079	1	0.0666665	0.0859584
C3PAT4	Nontoxin	Nontoxin	22.06	35.51	20.58	34.84	25.06	26.65	16.3	20.5	25.1875	6.90601	0.274184	FALSE	1368	0.255208	0	8	0	0	0	0	8	8	-0.552169		-0.552169	0.237004	0.309524	0.36	0.17265	0.0805195	0.0270582	-0.211111	0.0240548	-0.0396475
C4orf29	Nontoxin	Nontoxin	20.89	19.25	29.79	14.17	22.56	24.07	23.18	15.06	21.1213	5.05349	0.239261	FALSE	1386	0.297222	0	1	2	2	0	2	1	3	-0.0398569	-1.03789	1.52862	0.205158	0	0.6	0.358753	-0.272727	0.272816	0.088889	0.282222	0.392792
C4orf34	Nontoxin	Nontoxin	894.52	1216.67	978.05	1132.14	1075.76	1343.03	1463.17	670.06	1096.67	252.994	0.230692	FALSE	306	0.125	0	1	1	1	0	1	1	2	-1.49796	-1.16221	-1.16221	-0.210526			-0.0961538		-0.0961538	-0.4	0	0.0989399
C4orf43	Nontoxin	Nontoxin	12.7	15.82	26.88	15.06	19.07	19.42	27.14	28.85	20.6175	6.21005	0.301203	FALSE	570	0.125	0	2	1	1	0	1	2	3	-1.69654	-1.16221	-1.49796	-0.0701753	0	-0.428571	0.0556681		-0.0961538	-0.4	0	-0.0097355
C4orf52	Nontoxin	Nontoxin	154.62	78.58	78.82	75.09	54.65	34.69	164.46	94.47	91.9225	45.5082	0.495072	FALSE
C5orf43	Nontoxin	Nontoxin	87.29	134.61	117.75	64.87	67.38	59.92	123.91	137.76	99.1863	32.8878	0.331576	FALSE
C5orf51	Nontoxin	Nontoxin	49.32	50.28	56.34	54.72	33	35.13	57.6	61.44	49.7288	10.4278	0.209694	FALSE	867	0.125	0	2	1	1	0	1	2	3	-1.69654	-1.16221	-1.49796	-0.0701753	0	-0.428571	0.0177126	-0.428571	0.0177126	-0.4	0	-0.0097355
C6orf106	Nontoxin	Nontoxin	13.91	23.37	14.59	15.92	9.87	13.71	28.91	20.5	17.5975	6.21062	0.352926	FALSE	876	0.125	0	5	1	1	0	1	5	6	-2.00318	-1.16221	-1.9286	0.021328	0	0.0857145	-0.0202429	-0.085714	0.0177126	-0.0444443	0	-0.0097355
C6orf115	Nontoxin	Nontoxin	62.96	18.69	42.32	26.85	19.03	74.18	36.68	8.04	36.0938	22.9222	0.635074	FALSE
C6orf120	Nontoxin	Nontoxin	24.68	27.15	31.35	26.76	22.71	26.16	36.26	20.32	26.9237	4.98309	0.185082	FALSE	561	0.125	0	0	1	1	0	1	0	1	-1.16221	-1.16221		-0.210526			-0.0961538		-0.0961538	-0.4	0	0.0989399
C6orf125	Nontoxin	Nontoxin	28.46	38.42	46.72	36.71	29.29	52.6	44.62	25.46	37.785	9.69993	0.256714	FALSE	378	0.179167	0	2	0	0	0	0	2	2	-1.03789		-1.03789	-0.152882	-0.333333	-0.428571	0.0177126	-0.428571	0.0177126	-0.4	0.0833335	0.077442
C6orf35	Nontoxin	Nontoxin	20	7.83	17.2	33.46	15.49	9.07	25.46	15.36	17.9838	8.4155	0.46795	FALSE	483	0.309722	0	4	2	2	0	2	4	6	0.0949157	0.766969	-0.338587	-0.0227761	-0.2	-1.07532	0.179036	-0.490909	0.0205068	0.155898	0.0175926	0.157239
C6orf57	Nontoxin	Nontoxin	79.02	124.1	122.39	139.83	51.89	67.15	101.69	87.06	96.6412	30.6651	0.317309	FALSE	324	0.186905	0	3	4	4	0	4	3	7	-1.33828	-1.26856	-1.0018	0.00405514	0	-0.272727	0.0177126	-0.180952	0.037158	0.133333	-0.0612244	-0.0254115
C6orf62	Nontoxin	Nontoxin	41.44	86.16	54.62	76.92	41.31	56.21	70.79	74.32	62.7212	16.7757	0.267465	FALSE
C7orf42	Nontoxin	Nontoxin	11.8	29.44	16.89	16.74	19.07	11.52	38.36	40.6	23.0525	11.5656	0.501705	FALSE	945	0.125	0	1	0	0	0	0	1	1	-1.16221		-1.16221	-0.210526			-0.0961538		-0.0961538	-0.4	0	0.0989399
C7orf55	Nontoxin	Nontoxin	138.59	122.92	118.24	114.87	64.47	143.39	218.18	204.04	140.588	49.7501	0.353873	FALSE	342	0.175	0	0	4	4	0	4	0	4	-1.31182	-1.31182		0.023622	0		0.204082	-0.428571	0.149705	-0.153846	0.0555555	0.0701559
C8orf42	Nontoxin	Nontoxin	10.6	22.91	21.81	16.08	13.33	15.56	23.94	20.04	18.0337	4.84428	0.268623	FALSE	633	0.161111	0	1	2	2	0	2	1	3	-1.34917	-1.03789	-1.16221	0.0407123	0	-0.428571	0.145191		0.172414	8.88178e-17	0.0555557	0.0732265
C8orf59	Nontoxin	Nontoxin	28.59	68.11	56.79	62.69	55.35	50.51	106.75	56.54	60.6663	21.9596	0.361974	FALSE	300	0.227778	0	0	3	3	0	3	0	3	-0.707875	-0.707875		0.255076	0.5		0.179196	0.428571	0.304649	0	0.166667	0.242104
C9orf46	Nontoxin	Nontoxin	79.04	78.37	72.35	47.53	33.68	45.53	51.68	85.73	61.7388	19.3361	0.313192	FALSE	444	0.179167	0	1	1	1	0	1	1	2	-1.03789	-1.16221	-0.448318	-0.0441945			0.0381301		0.0381301	-0.2	0.0833335	0.223383
C9orf85	Nontoxin	Nontoxin	30.17	65.77	69.3	27.76	33.44	54.88	48.75	18.41	43.56	18.8027	0.43165	FALSE	456	0.279166	0	1	1	1	0	1	1	2	-0.188546	0.155746	-0.448318	-0.065574	-0.25	-0.428571	0.131579	-1	0.25		0.111111	-0.0389026
Cab45	Nontoxin	Nontoxin	500.36	1008.2	471.05	857.3	735.84	1128.49	634.43	502.6	729.784	248.729	0.340826	FALSE	1071	0.276389	0	5	1	1	0	1	5	6	-0.283688	-1.16221	0.0579688	0.195295	-0.0833332	0.390476	0.262707	-0.0190473	0.140531	0.266667	0.101323	0.0390796
CaBinding-p22	Nontoxin	Nontoxin	38.47	51.75	68.4	39.81	42.36	66.64	73.68	29.39	51.3125	16.4116	0.319837	FALSE
CaBinding39	Nontoxin	Nontoxin	32.64	60.67	73.42	49.35	52.9	47.7	83.21	47.01	55.8625	16.1012	0.288228	FALSE	1026	0.379167	0	2	0	0	0	0	2	2	0.660801		0.660801	0.407735	0.5	0.3	0.229701	0.6	0.451923	0.333334	0.340909	0.244303
CaChannel1	Nontoxin	Nontoxin	26.17	53.87	6.31	46.19	18.92	28.2	32.1	34.24	30.75	14.8885	0.484179	FALSE	681	0.351648	0	5	0	0	0	0	5	5	0.513233		0.513233	-0.0656562	-0.0424058		0.0622222	-0.38961	-0.126413	-0.356364	-0.015083	-0.0799316
CaIntBind1	Nontoxin	Nontoxin	34.86	76.98	34.15	43.66	31.25	67.22	56.63	46.11	48.8575	16.6703	0.341203	FALSE	573	0.212121	0	2	1	1	0	1	2	3	-0.903827	-0.912045	-0.609287					0.428571	0.121083	-0.4	0.117355	0.0833333
CalbindinD28K	Nontoxin	Nontoxin	420.44	295.99	303.44	176.98	210.09	145.62	429.22	253.53	279.414	104.916	0.375486	FALSE
Calcineurin-B1	Nontoxin	Nontoxin	20.23	45.85	34.5	28.21	20.84	33.66	26.47	27.57	29.6662	8.32299	0.280554	FALSE	513	0.125	0	1	0	0	0	0	1	1	-1.16221		-1.16221	0.54902		0.6		0.6		0.666667	0	-0.0640732
Calcyphosin2	Nontoxin	Nontoxin	17.1	18.94	17.1	14.91	14.03	12.64	22.01	18.25	16.8725	2.98842	0.177118	FALSE	1824	0.228571	0	3	4	4	0	4	3	7	-0.851113	-0.749507	-0.707875	0.00364406	-0.0833332	0.0857145	0.047584	-0.132467	-0.0114353	-0.08	0.0653062	0.0388417
Calcyphosine	Nontoxin	Nontoxin	22.1	31.17	36.54	41.39	31	15.4	32.2	37.64	30.93	8.50826	0.275081	FALSE	576	0.125	0	1	0	0	0	0	1	1	-1.16221		-1.16221	-0.210526			-0.0961538		-0.0961538	-0.4	0	0.0989399
Calglandulin	Nontoxin	Nontoxin	1327.88	9830.66	516.55	1089.48	74.11	475.7	255.92	890.21	1807.56	3269.13	1.80858	TRUE	471	0.335714	0	6	1	1	0	1	6	7	0.401607	0.649981	0.268442	-0.12993	-0.190476	-0.56391	-0.278649	0.0285716	-0.0614855	-0.257436	-0.0574044	-0.121662
calmegin	Nontoxin	Nontoxin	21.42	19.45	23	14.82	10.39	15.01	16.98	14.68	16.9688	4.12862	0.243307	FALSE	1791	0.255303	0	7	4	4	0	4	7	11	-0.577464	0.00745111	-0.851113	-0.105289	-0.333333	-0.478788	-0.279405	-0.2	-0.146504	-0.162773	-0.0725108	-0.0895774
Calmod	Nontoxin	Nontoxin	355.59	2338.16	101.9	252.3	21.01	105.26	52.69	572.95	474.983	775.074	1.63179	FALSE	405	0.275	0	4	0	0	0	0	4	4	-0.273705		-0.273705	0.0218707	0.0666667	-0.272727	0.180905	-0.376623	0.0727572	-0.167832	0.0347222	0.0705348
Calmodulin-1	Nontoxin	Nontoxin	70.1	138.76	72.33	75.42	84.53	113.44	105.9	109.66	96.2675	24.503	0.25453	FALSE	450	0.429167	0	2	0	0	0	0	2	2	1.08547		1.08547	-0.036257	-0.5	-1.8	0.10547	-0.272727	0.0686035	5.5511e-17	0.095238	0.29218
Calmodulin-2	Nontoxin	Nontoxin	94.27	237.34	162.36	123.63	96.79	185.68	140.68	96.23	142.123	50.9457	0.358463	FALSE
Calmodulin-3	Nontoxin	Nontoxin	62.24	115.39	59.25	60.68	63.24	77.65	89.31	74.19	75.2438	19.2635	0.256014	FALSE	450	0.256944	0	6	0	0	0	0	6	6	-0.50454		-0.50454	-0.0331608	-0.111111	-0.272727	0.00919207	0.309091	-0.0520014	-0.0700853	-0.010582	0.119756
Calmodulin-4	Nontoxin	Nontoxin	35.65	35.05	32.32	31.76	43.23	13.5	93.26	96.23	47.625	30.2756	0.635709	FALSE	450	0.125	0	1	0	0	0	0	1	1	-1.16221		-1.16221	-0.210526			-0.0961538		-0.0961538	-0.4	0	0.0989399
Calnexin	Nontoxin	Nontoxin	355.84	498.81	596.41	255.93	487.34	442.01	567.64	344.37	443.544	117.394	0.264672	FALSE	1848	0.260417	0	3	5	5	0	5	3	8	-0.489863	-0.160737	-0.814758	0.401522	0	0.557465	0.34008	0.510204	0.323513	0.187546	0.206528	0.114859
Calponin3	Nontoxin	Nontoxin	17.02	64.85	36.62	30.07	36.15	23.68	35.73	41.51	35.7037	14.1908	0.397459	FALSE
cAMPKin	Nontoxin	Nontoxin	79.13	71.94	112.8	64.99	71.82	71.82	117.96	77.71	83.5213	20.1696	0.241491	FALSE	1056	0.272222	0	4	0	0	0	0	4	4	-1.49796		-1.49796	0.0246393	-0.0454546	0.3	0.0177126	-0.642857	0.17441	0.228572	-0.0246914	0.112541
cAMPKinIa	Nontoxin	Nontoxin	11.42	18.92	22.12	21.97	14.32	17.27	24.71	17.19	18.49	4.38688	0.237257	FALSE	1149	0.204167	0	5	1	1	0	1	5	6	-1.104	-1.16221	-0.889754	-0.0604351	0	-0.033766	-0.0175721	0.257143	0.00943992	-0.4	0.0583334	0.0251221
cAMPResElement2	Nontoxin	Nontoxin	142.36	208.15	153.23	180.28	149.59	264.5	232.19	162.29	186.574	44.2116	0.236966	FALSE	366	0.225	0	1	1	1	0	1	1	2	-0.648609	-1.16221	0.155746	-0.170837	-0.5	-0.428571	0.0177126	-1	0.0769231	-0.4	0.111111	0.0766049
cAMPResp3	Nontoxin	Nontoxin	46.49	24	31	37.53	10.61	17.77	40.02	62.8	33.7775	16.7044	0.494541	FALSE	1518	0.363333	0	2	3	3	0	3	2	5	0.677634	-0.0665776	1.40398	0.311669	0.0416668	0.634085	0.363588	0.172932	0.139013	0.111538	0.156	0.223298
Canopy2	Nontoxin	Nontoxin	100.74	93.6	119.94	76.95	54.39	90.37	83.74	67.95	85.96	20.2062	0.235065	FALSE	543	0.125	0	0	1	1	0	1	0	1	-1.16221	-1.16221		0	0			-0.428571	0.131579		0	-0.0640732
Capping-b	Nontoxin	Nontoxin	69.66	146.32	86.32	145.12	90.65	119.31	155.15	106.49	114.877	31.763	0.276495	FALSE	819	0.183333	0	7	0	0	0	0	7	7	-1.38004		-1.38004	-0.0975713	0	-0.321428	-0.0201274	-0.350649	-0.0350866	-0.637037	-0.00280111	-0.00993311
CarbonylReductase4	Nontoxin	Nontoxin	38.28	24.36	43.82	19.21	19.03	23.36	42.8	20.06	28.865	10.8533	0.376001	FALSE	714	0.125	0	1	0	0	0	0	1	1	-1.16221		-1.16221	-0.210526			-0.0961538		-0.0961538	-0.4	0	0.0989399
CarbReductase1	Nontoxin	Nontoxin	75.92	74.63	116.44	60.86	71.34	62.02	154.38	67.6	85.3988	32.9305	0.385609	FALSE	828	0.252778	0	2	1	1	0	1	2	3	-0.467388	-1.16221	0.129959	-0.0732546	0	-0.428571	-0.163684	-0.142857	0.012184	-0.4	-0.021978	-0.0848786
CaRegHSP1	Nontoxin	Nontoxin	3.09	10.45	5.51	13.91	15.19	8.28	27.46	4.95	11.105	7.87291	0.708952	FALSE	444	0.233333	0	1	1	1	0	1	1	2	-0.57783	-0.448318	-0.448318	0.122137			0.172414		0.172414	8.88178e-17	0.166667	0.347826
CarnosineDipeptidase1	Nontoxin	Nontoxin	17.9	2.01	25.1	11.9	10.62	17.49	17.89	8.71	13.9525	7.10425	0.509174	FALSE	1485	0.230769	0	8	1	1	0	1	8	9	-0.529027	-0.264521	-0.523872	0.0974385	-0.409524		0.0666668	-0.15102	0.168972	0.0666668	0.114737	-0.0160713
Carrier2	Nontoxin	Nontoxin	18.52	58.75	26.81	37.08	30.25	43.37	79.47	22.93	39.6475	20.5292	0.517794	FALSE	1002	0.316667	0	2	0	0	0	0	2	2	0.129959		0.129959	0.223297	-0.333333	-0.428571	0.346469	-0.428571	0.346469	0.444444	0.291667	0.380021
Carrier30-4	Nontoxin	Nontoxin	20.92	39	23.61	28.03	12.06	23.31	26.23	17.59	23.8438	7.92631	0.332427	FALSE	1287	0.267105	0	14	5	5	0	5	14	19	-0.455346	-0.434118	-0.417026	0.222657	1.25e-07	0.241559	0.261702	0.134777	0.285781	0.114482	0.179165	0.19947
CaseinKin1a	Nontoxin	Nontoxin	20.67	36.19	25.16	27.18	19.95	28.13	30.76	29.67	27.2137	5.34286	0.19633	FALSE	1014	0.197222	0	3	0	0	0	0	3	3	-1.0018		-1.0018	0.557052		0.8	0.172414	0.8	0.172414	0.555556	0.0555557	0.0505593
CaseinKinIIa	Nontoxin	Nontoxin	28	48.2	28.17	24.54	20.03	23.88	40.46	29.7	30.3725	9.3629	0.308269	FALSE	1053	0.125	0	3	0	0	0	0	3	3	-1.69654		-1.69654	0.042656		0.6	-0.0961538	0.6	-0.0961538	-0.0444443	0	0.0446022
CasKin2b	Nontoxin	Nontoxin	60.56	116.92	111.47	91.15	82.93	90.83	121.96	73.55	93.6713	21.6748	0.231392	FALSE	648	0.179167	0	2	0	0	0	0	2	2	-1.03789		-1.03789	-0.0476191	-0.166666	-0.428571	0.131579	-0.428571	0.131579		0.0833335	-0.00406455
Caspase6	Nontoxin	Nontoxin	11.76	14.68	9	13.48	5.93	7.71	10.47	13.49	10.815	3.09392	0.286077	FALSE	933	0.179167	0	2	0	0	0	0	2	2	-1.03789		-1.03789	-0.105263	0	-1	0.0769231		-0.0961538	-0.4	0	-0.0165676
Catalase	Nontoxin	Nontoxin	11.45	26.36	18.46	10.91	7.48	13.94	42.35	50.3	22.6562	15.8258	0.698518	FALSE	1575	0.161111	0	3	0	0	0	0	3	3	-1.34917		-1.34917	0.0810853	-0.333333	0.0857145	0.0177126	0.0857145	0.0177126	0.133333	0.0555557	0.0302703
CatecholOMethyltrans1	Nontoxin	Nontoxin	23.57	31.63	9.62	3.04	16.5	13.36	51.81	32.73	22.7825	15.6375	0.686382	FALSE	795	0.186667	0	4	1	1	0	1	4	5	-1.25426	0.155746	-1.54972	0.00121984	0		0.0934474	-0.428571	0.1087	-0.184615	0.0777778	0.158293
Catenin-b1-1	Nontoxin	Nontoxin	36.28	74.31	48.04	43.5	27.66	44.57	63.58	46.51	48.0562	14.7369	0.30666	FALSE	2346	0.277778	0	6	0	0	0	0	6	6	-0.267913		-0.267913	0.109159	0.1	0.714286	0.451852	-1	0.16	-1	0.138889	0.0394439
Cathepsin-L1	Nontoxin	Nontoxin	22.39	27.89	46.85	19.99	13.52	17.27	36.41	44.17	28.5613	12.5667	0.43999	FALSE	1017	0.479166	0	2	0	0	0	0	2	2	1.51015		1.51015	-0.0068735	-0.5	-1.4	0.04626	0.077922	0.162171	0.5	-0.113095	0.202034
CathepsinB	Nontoxin	Nontoxin	27	94.07	38.47	62.5	30.92	49.65	76.48	38.44	52.1912	23.6671	0.45347	FALSE	1023	0.28125	0	7	1	1	0	1	7	8	-0.240638	-1.16221	0.0257909	0.0812095	0	-0.0967531	-0.0371265	0.394286	0.0151405	0.140637	-0.010058	-0.0305675
CathepsinD	Nontoxin	Nontoxin	33.28	81.39	102.32	74.25	72.32	95.64	146.53	83.33	86.1325	31.9732	0.371209	FALSE	1203	0.35	0	1	2	2	0	2	1	3	0.467837	0.200738	0.649981	-0.0112178	0.1	0.473684	0.0462037	-0.428571	-0.0871953	-0.051282	-0.0299146	0.070641
Caveolin1	Nontoxin	Nontoxin	6	16.69	14.65	4.75	4.37	13.42	15.09	18.39	11.67	5.69866	0.488317	FALSE	537	0.233333	0	0	1	1	0	1	0	1	-0.448318	-0.448318		0.224719	0	0.6		-0.272727	0.131579	0.666667	-0.142857	0.0559441
Caveolin2	Nontoxin	Nontoxin	98.67	142.2	37.79	66.66	118.05	128.71	95.08	77.24	95.55	34.4303	0.360338	FALSE	489	0.413889	0	2	1	1	0	1	2	3	1.08241	1.03439	0.766969	0.325274	0	0.515789	0.462741	0.194805	0.293299	1.11022e-16	0.377778	0.200373
CCAATD	Nontoxin	Nontoxin	23.51	12.83	5.51	42.71	21.45	42.22	35.36	51.75	29.4175	16.1234	0.548088	TRUE	948	0.293939	0	3	2	2	0	2	3	5	-0.152636	0.334432	-0.476295					-0.214285	0.107819	-0.5	0.0921898	0.0863636
Ccd101	Nontoxin	Nontoxin	12.61	36.63	32.25	14.89	21.77	15.46	32.4	27.87	24.235	9.28365	0.383068	FALSE	882	0.2625	0	4	0	0	0	0	4	4	-0.403469		-0.403469	0.12703	0.25	0.3	0.00415567	0.6	0.002041	-0.377778	0.0486113	-0.0233871
Ccd13	Nontoxin	Nontoxin	25.76	6.99	3.69	17.63	25.09	36.51	44.76	6.51	20.8675	14.9359	0.715751	FALSE	288	0.179167	0	2	0	0	0	0	2	2	-1.03789		-1.03789	0.5	0	1		0.285714	0.131579	1	0	-0.0980741
ccd149	Nontoxin	Nontoxin	65.12	95.65	35.46	93.82	57.11	93.96	83.92	77.57	75.3262	21.4026	0.284132	FALSE	1572	0.249405	0	8	6	6	0	6	8	14	-0.670495	-0.583416	-0.626937	0.0530455	-0.060606	-0.048335	0.16495	-0.114285	0.0823076	-0.0793651	0.0811911	0.0665935
CCDC-94	Nontoxin	Nontoxin	7.07	22.52	11.07	12.83	13.01	16.1	14.99	11.54	13.6412	4.50335	0.330128	FALSE	984	0.205	0	3	2	2	0	2	3	5	-1.05378	-1.49796	-0.413947	-0.0494372	-0.166667	-0.619047	0.124217	-0.428571	0.0798357	-0.276923	0.0888888	0.0995813
CCDC124	Nontoxin	Nontoxin	7.85	2.47	0	25.87	17.03	29.44	27.71	28.34	17.3388	12.3036	0.709603	TRUE	666	0.272727	0	5	2	2	0	2	5	7	-0.405701	0.334432	-0.70345					0.554286	0.110897	0.27094	-0.00244611	-5.35259e-17
CCDC126	Nontoxin	Nontoxin	20.8	22.65	18.56	16.28	15.69	15.48	37.16	35.24	22.7325	8.69788	0.382619	FALSE
CCDC134	Nontoxin	Nontoxin	16.93	21.96	32.22	14.62	25	32.82	49.88	27.6	27.6288	11.1219	0.40255	FALSE	690	0.125	0	2	0	0	0	0	2	2	-1.49796		-1.49796	0.169247		0.6	-0.0961538	0.6	-0.0961538	0.133333	0	0.0174334
CCDC75	Nontoxin	Nontoxin	36.04	39.6	46.78	34.23	30.74	20.51	32.59	42.64	35.3912	8.04153	0.227218	FALSE	762	0.125	0	0	2	2	0	2	0	2	-1.49796	-1.49796		0.27451	0	0.0857145	0.131579	0.6		0.666667	0	-0.0640732
CCHCCHD7	Nontoxin	Nontoxin	25.5	28.9	22.89	13.06	19.32	13	33.17	25.31	22.6437	7.18299	0.317217	FALSE
CCHCCHDC3	Nontoxin	Nontoxin	25.61	66.02	41.26	38.32	19.02	32.4	45.37	47.59	39.4488	14.4936	0.367404	FALSE	732	0.241667	0	4	1	1	0	1	4	5	-0.652823	-1.16221	-0.316959	-0.132034		0.6	0.00317128	0.6	0.00317128	-0.550769	0.127778	0.214857
CD151Antigen	Nontoxin	Nontoxin	16.76	35.83	31.51	11.35	11.65	16.84	19.68	17.33	20.1187	8.90598	0.442671	FALSE	756	0.223333	0	3	2	2	0	2	3	5	-0.853303	-1.49796	-0.120019	0.0241562	0	-0.428571	0.0913923	-0.428571	0.0913923	-0.118519	0.0261906	0.0637953
CD2AntCytTail2	Nontoxin	Nontoxin	10.22	17.59	6.92	15.47	8.29	10.08	24.71	16.74	13.7525	5.96605	0.433815	FALSE	1131	0.168939	0	7	4	4	0	4	7	11	-1.66016	-1.83088	-1.25477	-0.0633835	-0.1	-1.8	-0.126817	-0.622857	0.0953635	-0.2	-0.00757575	-0.0483192
CD59	Nontoxin	Nontoxin	12.75	5.15	26.06	19.99	0.93	6.63	44.41	13.7	16.2025	14.002	0.86419	FALSE
CD63	Nontoxin	Nontoxin	111.74	227.36	163.32	255.64	142.38	175.81	286.98	145.62	188.606	61.3759	0.325418	FALSE	717	0.288889	0	6	0	0	0	0	6	6	-0.141712		-0.141712	0.153	0	-0.085714	0.257997	-0.376623	0.245449	0.1	0.130425	0.189419
CD81	Nontoxin	Nontoxin	29.46	73.3	38.19	22.71	18.14	35.17	37.3	37.73	36.5	16.6383	0.455844	FALSE	693	0.225	0	6	0	0	0	0	6	6	-0.867368		-0.867368	0.325383	-0.166666	0.428572	-0.00824895	0.642857	-0.0548583	0.4	0.0833333	-0.0787587
CD82	Nontoxin	Nontoxin	11.92	43.04	22.32	33.94	17.61	23.99	34.78	27.47	26.8837	10.0898	0.375312	FALSE	795	0.278571	0	4	3	3	0	3	4	7	-0.26651	-0.14674	-0.295332	0.321444	0	0.0857145	0.351948	-0.085714	0.341997	0.311111	0.17347	0.280387
CD9	Nontoxin	Nontoxin	74.5	193	125.18	237.63	94.61	147.68	183.65	117.45	146.713	54.8024	0.373536	FALSE	654	0.304167	0	4	0	0	0	0	4	4	0.0290785		0.0290785	0.511885	0	0.809524	0.486467	0.52381	0.345142	0.3	0.333333	0.20706
CDC28Kinase-1B	Nontoxin	Nontoxin	16.33	117.75	6.08	55.5	44.34	69.35	48.49	88.81	55.8313	36.5002	0.65376	FALSE	240	0.5125	0	2	0	0	0	0	2	2	1.79326		1.79326	0.107237	-0.25	0.3	0.445248	-1.03636	0.119561	1.11022e-16	0.257576	0.305366
CDC42	Nontoxin	Nontoxin	60.87	143.77	90.56	128.84	85.59	120.86	121.7	80.82	104.126	28.5686	0.274365	FALSE	576	0.125	0	2	0	0	0	0	2	2	-1.49796		-1.49796	-0.105263	0	-0.428571	0.0177126		-0.0961538	-0.4	0	0.0174334
CDC42-1	Nontoxin	Nontoxin	12.11	20.88	6.31	13.83	3.09	18.66	12.58	6.76	11.7775	6.16132	0.523143	FALSE	237	0.179167	0	2	0	0	0	0	2	2	-1.03789		-1.03789	-0.0476191	-0.166666	-0.428571	0.131579	-0.428571	0.131579		0.0833335	-0.00406455
cdc42-4	Nontoxin	Nontoxin	7.32	20.94	23.8	17.37	5.88	12.87	6.48	9.92	13.0725	6.90454	0.528173	FALSE	1026	0.254167	0	5	5	5	0	5	5	10	-0.58411	-0.962656	-0.0696093	0.101128	0.233333	0.083117	0.103281	0.187879	-0.151274	0.00202033	-0.0442856	0.0125002
CDC5	Nontoxin	Nontoxin	21.84	32.57	44.9	37.22	24.09	28.84	48.34	59.66	37.1825	13.0218	0.350213	FALSE	2412	0.293518	0	8	1	1	0	1	8	9	-0.0956311	-1.16221	0.158121	-0.105657	-0.133333	0.0428572	-0.129812	-0.352381	-0.141421	-0.21859	-0.0613757	0.0287944
CDGSH2	Nontoxin	Nontoxin	70.37	67.09	43.5	69.45	44.51	58.71	147.74	52.63	69.25	33.4431	0.482933	FALSE
CdK2	Nontoxin	Nontoxin	48.8	30.31	38.6	16.51	24.66	29	37.84	33.19	32.3637	9.75364	0.301376	FALSE	621	0.191667	0	1	2	2	0	2	1	3	-1.05524	-0.648609	-1.16221	-0.129146	-0.333333	-0.272727	-0.0202429	-0.272727	-0.0202429	-0.0444443	-0.0222222	0.126134
CDK5-1-1	Nontoxin	Nontoxin	12.24	17.43	25.89	13.14	11.55	17.5	20.16	18.26	17.0212	4.75539	0.27938	FALSE	1734	0.179167	0	3	3	3	0	3	3	6	-1.38795	-1.0018	-1.34917	-0.231882	-0.166666	-0.428571	-0.0548583	-0.428571	-0.0921457	-0.7	0.0277778	0.0946881
CDK5-3	Nontoxin	Nontoxin	69.3	120.99	104.31	38.77	52.93	35.24	98.37	148.46	83.5463	40.9624	0.490296	TRUE	1524	0.41	0	4	1	1	0	1	4	5	1.18795	0.649981	1.1537	0.538001	0.0555557	0.266986	0.718442	-1.8	0.625	0.833333	0.265983	0.464583
CDPSOPT	Nontoxin	Nontoxin	16.14	31.53	8.11	50.7	22.07	40.26	45.86	16.39	28.8825	15.5703	0.539091	FALSE	726	0.315	0	10	0	0	0	0	10	10	0.168733		0.168733	-0.106307	-0.166667	-0.611428	-0.0289856	0.0311688	-0.0557434	-0.335802	0.0350627	0.0721273
CellCyc50A	Nontoxin	Nontoxin	19.45	30.68	25.76	23.83	19.52	19.02	31.57	19.62	23.6812	5.19613	0.21942	FALSE	1119	0.315556	0	5	0	0	0	0	5	5	0.0171438		0.0171438						-0.0181572		-0.0181572	-0.0181572
CellCycle-RAD1	Nontoxin	Nontoxin	8.77	13.26	16.51	7.73	12.64	6.74	23.3	10.6	12.4437	5.43462	0.436735	FALSE	846	0.197222	0	1	2	2	0	2	1	3	-1.0018	-1.03789	-0.448318	0.0407123	0	0.0857145	0.0177126	-0.2	0.0769231	1.11022e-16	0.0555557	-0.108212
CellDeath10	Nontoxin	Nontoxin	41.15	57.41	93.46	48.65	45.49	54.97	77.51	56.47	59.3888	17.5757	0.295943	FALSE	639	0.4625	0	2	0	0	0	0	2	2	1.36859		1.36859	0.255645	0.25	0.6	0.507952	-0.214285	0.0083769	0.109091	0.131054	0.237816
CellDeath4-1	Nontoxin	Nontoxin	23.55	19.25	21.83	40.65	9.2	12.75	18.84	70.5	27.0712	19.87	0.733988	FALSE	1407	0.191667	0	1	2	2	0	2	1	3	-1.05524	-1.49796	0.155746	0.214503	0	0.6	0.204082	0.0857145	0.16783	0.25641	0.074074	0.114899
CellDeath5	Nontoxin	Nontoxin	49.5	103.97	68.48	49.67	45.08	62.56	86.23	54.63	65.015	20.5879	0.316664	FALSE
CellDeath6	Nontoxin	Nontoxin	9.04	27.28	24.27	7.06	13.8	6.74	25.63	21.83	16.9562	8.73413	0.515098	FALSE
CellDiffRCD1	Nontoxin	Nontoxin	14.38	28.74	19.99	22.11	25.04	24.97	34.34	20.03	23.7	6.07857	0.25648	FALSE	900	0.525	0	1	0	0	0	0	1	1	1.4737		1.4737	0.693333	0.5	0.6	1	0	0.555556	0.666667	0.515152	0.617092
CellDivCycle123	Nontoxin	Nontoxin	72.89	89.77	122.92	119.48	74.06	103.78	105.02	160.45	106.046	28.8308	0.27187	FALSE	1032	0.238889	0	5	1	1	0	1	5	6	-0.709617	-1.16221	-0.434118	0.0454923	-0.166666	0.311278	0.0237333	0.557895	0.0507453	-0.328889	0.133598	0.0650766
CellGrowthNucleolar	Nontoxin	Nontoxin	21.05	65.77	60.93	42.14	44.44	53.34	52.46	45.32	48.1812	13.6884	0.284102	FALSE	1071	0.359028	0	3	9	9	0	9	3	12	0.730904	0.965078	-0.0665776	0.309954	-0.0555556	-0.357143	0.290573	0.0285717	0.326254	0.377778	0.0951424	0.261118
Centrin-3	Nontoxin	Nontoxin	9.63	28.13	34.15	24.7	31.6	18.7	32.49	26.53	25.7413	8.16912	0.317355	FALSE	504	0.125	0	0	1	1	0	1	0	1	-1.16221	-1.16221		0	0	-0.428571	0.131579				0	-0.0640732
Centrin2	Nontoxin	Nontoxin	34.43	47.4	27.13	46.81	42.45	29.83	60.28	60.64	43.6212	12.7594	0.292503	FALSE	519	0.458333	0	1	0	0	0	0	1	1	1.03439		1.03439	0.323529	0		0.561358	-0.428571	0.157729	0.444444	0.166667	0.482278
Ceramidase3	Nontoxin	Nontoxin	12.67	47.38	19.14	19.41	17.25	22.36	30.72	31.38	25.0387	11.0772	0.442401	FALSE	798	0.225275	0	5	1	1	0	1	5	6	-0.367539		-0.367539	-0.13137	-0.324675		-0.106667	-0.428571	0.0209317	-0.133333	0.00532682	0.101307
Cerebellar	Nontoxin	Nontoxin	21.92	36.75	21.38	26.2	17.35	27.73	11.35	19.39	22.7587	7.61275	0.334498	FALSE	1383	0.351786	0	9	5	5	0	5	9	14	0.650614	0.386027	0.716827	-0.0437358	-0.0555554	0.25933	0.017282	-0.207081	-0.104554	-0.355424	0.0495394	0.030942
CerSynth2	Nontoxin	Nontoxin	14.14	32.16	14.88	22.91	16.71	19.49	25.23	12.74	19.7825	6.62952	0.335121	FALSE	1164	0.232292	0	8	0	0	0	0	8	8	-0.826316		-0.826316	-0.0388277	-0.111111	0.163636	0.00750994	-0.132467	-0.0205595	-0.14026	0.0482144	0.0840603
ChargedMultivesicular5	Nontoxin	Nontoxin	51.83	104.47	99.96	42.67	56.4	43.73	104.05	117.22	77.5413	31.5597	0.407005	FALSE
Chitinase3	Nontoxin	Nontoxin	10.22	40.55	39.69	43.6	10.79	26.95	9.15	13.04	24.2487	15.201	0.626876	FALSE	1164	0.161111	0	1	5	5	0	5	1	6	-1.59303	-1.69167	-0.448318	-0.286184			-0.130769		-0.130769	-0.6	0	0.129023
CholineTransporter4	Nontoxin	Nontoxin	24.16	35.68	19.65	39.35	17.21	20.7	29.88	34.99	27.7025	8.3979	0.303146	FALSE	2154	0.273039	0	12	5	5	0	5	12	17	-0.372761	-0.962656	-0.0437171	0.103295	-0.0555554	0.0571431	0.0693829	0.0805196	0.0919403	0.0321678	0.0774044	0.072164
ChromatinMod1A	Nontoxin	Nontoxin	16.08	26.66	22.98	27.11	25.23	25.21	26.84	14.59	23.0875	4.97772	0.215602	FALSE	591	0.379167	0	2	0	0	0	0	2	2	0.660801		0.660801	0.707994	0.5	0.514285	0.777778	0.6	1	0.666667	0.511905	0.457879
Chromobox3-1	Nontoxin	Nontoxin	28.14	50.37	41.34	30.06	29.08	29.52	56.97	54.52	40	12.4021	0.310052	FALSE
CitrateSyn	Nontoxin	Nontoxin	34.42	34.14	24.2	26.65	16.97	25.14	32.76	37.21	28.9362	6.81897	0.235655	FALSE	1410	0.258333	0	2	1	1	0	1	2	3	-0.413947	-1.16221	0.200738	-0.210526	0	0.6	0.0587045	-1.8	-0.269231	-0.637037	0.0123457	0.0684048
CJMB042m14	Nontoxin	Nontoxin	126.9	192.4	187.78	170.75	115.61	197.08	203.03	167	170.069	32.6619	0.192051	FALSE	1470	0.330556	0	6	0	0	0	0	6	6	0.331543		0.331543	0.37951	-0.333333	0.605263	0.406851	0.605263	0.406851	0.0666667	0.361111	0.237894
CKIIa	Nontoxin	Nontoxin	57.41	87.17	28.47	70.85	39.78	60.06	81.38	86.65	63.9712	21.7347	0.339758	FALSE	1179	0.299145	0	9	0	0	0	0	9	9	0.382423		0.382423	0.0622788	0		-0.181481	0.493233	-0.0244916	-0.127564	0.0926306	-0.00107456
ClassW	Nontoxin	Nontoxin	11.86	19.71	16.13	10.01	16.18	14.31	12.41	14.19	14.35	3.02545	0.210833	FALSE	1512	0.290278	0	5	1	1	0	1	5	6	-0.125936	-1.16221	0.240223	0.0426895	0.1	-0.272727	0.198428	-0.350649	0.0741499	-0.0888888	0.115079	0.284155
ClathrinInt1	Nontoxin	Nontoxin	16.04	37.74	41.77	28.88	20.96	29.02	33.77	29.07	29.6563	8.37847	0.282519	FALSE	1965	0.354629	0	6	3	3	0	3	6	9	0.649122	0.601441	0.552395	0.203659	-0.104167	0.531257	0.301442	-0.0569035	0.081076	0.30303	0.172304	0.0274195
Claudin15	Nontoxin	Nontoxin	42.25	99.44	51.56	37.12	46.14	86.41	55.32	26	55.53	24.9941	0.450101	FALSE	699	0.161111	0	5	1	1	0	1	5	6	-1.59303	-1.16221	-1.45474	-0.016501	0	0.6	-0.148077	-0.314285	0.0434008	-0.244444	0	-0.00602762
Claudin4-1	Nontoxin	Nontoxin	423.41	512.72	421.12	344.88	258.22	336.06	316.85	570.12	397.923	104.709	0.26314	FALSE	645	0.35625	0	3	1	1	0	1	3	4	0.569763	-1.16221	1.26946	0.062904	-0.166667	0.333333	0.213889	-1	0.001012	0	0.145833	0.108491
Claudin7	Nontoxin	Nontoxin	103	120.24	33.93	171.1	103.51	162.05	164.26	120.01	122.262	45.1449	0.369246	FALSE	645	0.275253	0	6	0	0	0	0	6	6	0.236173		0.236173					0.0666667	-0.0497829	0.111453	-0.0729605	0.0183334
Cleavage3	Nontoxin	Nontoxin	21.12	24.72	31.2	25	23.56	27.69	46.18	23.28	27.8438	8.0155	0.287874	FALSE	2079	0.341667	0	7	0	0	0	0	7	7	0.471202		0.471202	-0.178239	0.0416668	0.342857	-0.0260231	-0.105974	-0.206162	-0.565412	0.024606	0.044454
Cleavage4	Nontoxin	Nontoxin	16.21	47.35	27.29	23.11	17.27	28	36.91	40.78	29.615	11.1792	0.377485	FALSE	807	0.325757	0	2	0	0	0	0	2	2	0.145688		0.145688					0.3	0.136187	0.333334	-0.0455	0.0833335
Cleavage5	Nontoxin	Nontoxin	20.42	43.64	20.06	30.82	24.28	24.35	26.74	27.34	27.2063	7.53284	0.276879	FALSE	684	0.233333	0	1	0	0	0	0	1	1	-0.448318		-0.448318	-0.0952381	-0.333333	-0.428571	0.131579	-0.428571	0.131579		0.166667	0.0559441
CleftTm1	Nontoxin	Nontoxin	118.96	66.53	118.24	79.26	63.55	62.8	81.21	119.87	88.8025	25.9114	0.291787	FALSE	1638	0.3125	0	3	1	1	0	1	3	4	0.115588	-1.16221	0.708323	0.294539	0	0.52381	0.170122	1	0.18297	0.245014	0.263889	0.012305
CLIC-1	Nontoxin	Nontoxin	24.12	52.15	40.02	39.26	28.03	33.74	48.23	37.33	37.86	9.41912	0.248788	FALSE	1680	0.25463	0	3	6	6	0	6	3	9	-0.569565	-0.756942	-0.0665776	0.0594072	0.111111	-0.0424058	0.00146657	-0.0714285	0.127168	-0.138461	0.008027	-0.0265662
ClICP1	Nontoxin	Nontoxin	239.96	235.77	259.15	473.93	260.78	369.16	323.82	344.28	313.356	82.0043	0.261697	FALSE	726	0.310417	0	8	0	0	0	0	8	8	0.108276		0.108276	0.123997	-0.0222222	0.045195	0.253358	-0.253432	-0.209015	0.174359	-0.0251322	0.0218196
CLK1	Nontoxin	Nontoxin	53.87	80.96	46.18	54.03	40.14	41.4	67.1	60.96	55.58	13.8304	0.248837	FALSE	1437	0.318055	0	4	2	2	0	2	4	6	0.189567	0.837748	-0.252077	0.265474	0	0.428571	0.41162	-0.428571	0.29517	0.333333	0.200397	0.314959
clpX	Nontoxin	Nontoxin	31.31	71.14	47.05	55.09	37.24	62.37	60.29	41.56	50.7563	13.728	0.270469	FALSE	1923	0.343939	0	11	0	0	0	0	11	11	0.533727		0.533727	0.268207	-0.0625	-0.214545	0.317373	0.0424243	0.384711	0.351515	0.143029	0.208638
Clusterin	Nontoxin	Nontoxin	13.86	85.28	29.05	37.9	23.1	48.22	28.07	45.14	38.8275	21.9376	0.565002	FALSE	1380	0.302083	0	4	0	0	0	0	4	4	0.00745111		0.00745111	-0.145258	-0.277778	-0.090909	0.0928003	-0.885714	-0.100294	-0.6	0.0833332	0.0346158
CMB4c	Nontoxin	Nontoxin	23.21	38.65	30.32	26.19	30.51	18.35	54.97	26.84	31.13	11.3061	0.363191	FALSE	666	0.286111	0	2	1	1	0	1	2	3	-0.14674	-1.16221	0.554633	0.137071	0.166667	0.077922	0.189672	-0.214285	0.0469925	-0.181818	0.0333334	-0.0227123
CMVB-2a	Nontoxin	Nontoxin	41.9	60.81	68.85	35.35	44.63	45	86.33	47.33	53.775	16.9842	0.315838	FALSE	663	0.2625	0	2	0	0	0	0	2	2	-0.330104		-0.330104	0.232558	0	0.285714	0.131579	-1	0.25	1	-0.166666	0.0267869
CNPPD1	Nontoxin	Nontoxin	9.86	36.67	13.07	13.81	10.38	12.79	27.06	17.21	17.6062	9.43675	0.535988	FALSE	1269	0.211666	0	3	2	2	0	2	3	5	-0.980881	-1.03789	-0.654434	0.027266	0	-0.27619	0.11446	-0.350649	0.0242597	0.088889	-0.0238094	0.015827
CoAReductase	Nontoxin	Nontoxin	13.61	19.3	15.92	11.36	17.3	17.21	60.45	16.56	21.4637	15.94	0.742648	FALSE	2646	0.247727	0	6	5	5	0	5	6	11	-0.672437	-1.69167	0.347318	-0.0242745	-0.375	0.195238	0.0527413	-0.44	-0.00811991	-0.165242	0.0989899	0.0604111
Coatomer-b	Nontoxin	Nontoxin	38.32	49.41	71.44	43.9	61	56.17	65.09	40.67	53.25	12.0888	0.22702	FALSE	2862	0.32	0	14	1	1	0	1	14	15	0.242223	0.155746	0.235847	0.13559	-0.030303	0.0140262	0.339939	-0.601558	0.0917247	0.210774	0.098243	0.230118
Coatomer-bp	Nontoxin	Nontoxin	122.41	98.79	202.31	92.97	146.97	129.13	175.12	97.68	133.173	39.4973	0.296587	FALSE	2733	0.279166	0	2	2	2	0	2	2	4	-0.23045	-0.188546	-0.188546	0.085726	-0.166666	0.0476193	-0.00824895	0.333333	0.0977453	-0.166666	0.180556	0.0357133
Coatomer-d	Nontoxin	Nontoxin	111.97	154.49	176.81	185.06	161.66	202.19	182.5	124.06	162.343	31.1325	0.19177	FALSE	1536	0.191667	0	2	1	1	0	1	2	3	-1.05524	-1.16221	-0.648609	-0.043716	-0.166667	-0.428571	0.131579	-1	0.25		0.074074	-0.0246255
Coatomer-e	Nontoxin	Nontoxin	99.68	175.6	146.33	149.68	151.19	211.69	181.92	78.72	149.351	43.2674	0.289702	FALSE	909	0.226389	0	9	3	3	0	3	9	12	-0.950375	-1.69654	-0.50186	0.0520871	0.111111	0.0140262	0.0876262	0.0857145	0.0486854	-0.194017	0.0384259	0.0763174
Coatomer-g	Nontoxin	Nontoxin	27.19	33.88	41	27.48	42.57	32.62	48.03	26.93	34.9625	8.04154	0.230005	FALSE	2625	0.196667	0	9	1	1	0	1	9	10	-1.2957	-1.16221	-1.17891	-0.120904	0.125	-0.285714	-0.0780798	-0.2	0.00550813	-0.341958	-0.007326	0.0517471
Coatomer-g2	Nontoxin	Nontoxin	19.39	41.41	21.28	40.31	31.87	46.73	48.66	25.76	34.4262	11.4513	0.332632	FALSE	2616	0.286905	0	19	9	9	0	9	19	28	-0.197687	-0.908089	0.185876	0.0763722	-0.141667	-0.21604	0.0941649	0.00845888	0.0716717	-0.0787179	0.0995703	0.0773851
Coatomer-z1	Nontoxin	Nontoxin	91.6	90.32	137.11	100.64	64.6	148.78	128.39	112.92	109.295	27.9188	0.255444	FALSE	534	0.161111	0	2	1	1	0	1	2	3	-1.34917	-1.16221	-1.03789	-0.031746	-0.111111	-0.428571	0.131579	-0.428571	0.131579		0.0555557	-0.0240674
Coatomer-z2	Nontoxin	Nontoxin	98.64	130.21	96.77	53.03	73.14	48.97	151.59	112.5	95.6063	36.095	0.377539	FALSE	654	0.236111	0	0	3	3	0	3	0	3	-0.627713	-0.627713		0.428792	0	0.0857145	0.442945	0.6	0.75431	0.666667	0.177778	0.241285
Cofilin2	Nontoxin	Nontoxin	110.95	166.64	78.03	158.17	155.19	240.72	266.25	134.3	163.781	62.7312	0.383018	FALSE	501	0.5	0	2	0	0	0	0	2	2	1.6871		1.6871	0.792793	0.5	1	1	0.428571	0.555556		0.722222	0.453853
ColdShockE1	Nontoxin	Nontoxin	112.4	135.16	128.04	74.63	76.41	86.87	155.07	141.57	113.769	31.1515	0.273814	FALSE	2298	0.227083	0	3	1	1	0	1	3	4	-0.771134	-1.16221	-0.387226	0.175966	0	-0.38961	0.284231	0.6	1	0.666667	0.17	0.134848
Collagen4-3aBinding	Nontoxin	Nontoxin	19.78	11.63	25.55	13.8	15.01	14.72	24.15	28.7	19.1675	6.31884	0.329664	FALSE	1797	0.3625	0	2	0	0	0	0	2	2	0.519243		0.519243	0.0880241	0.25	0.6	0.0381301	0.077922	-0.020012	-0.290909	0.0051282	-0.0977249
COMM-4-1	Nontoxin	Nontoxin	25.2	30.37	33.99	31.33	21.8	17.19	26.28	28.56	26.84	5.45408	0.203207	FALSE	600	0.216667	0	4	5	5	0	5	4	9	-1.03221	-1.09023	-0.684625	0.0829236	0	0.0857145	0.152742	0.257143	0.15627	-0.152525	0.122222	0.166232
COMM-8	Nontoxin	Nontoxin	18.44	23.96	27.04	35.44	24.4	24.86	35.26	36.04	28.18	6.58895	0.233817	FALSE	528	0.213095	0	1	6	6	0	6	1	7	-1.03206	-1.59303	1.4737	-0.0777563	-0.0833333	-0.571428	-0.126478	-0.333333	-0.0146709	-0.317949	-0.0323129	-0.0649931
COMM2	Nontoxin	Nontoxin	13.78	13.29	24.99	11.79	11.93	18.95	22.68	14.63	16.505	5.07857	0.307699	FALSE
COMM3-2-2	Nontoxin	Nontoxin	25.11	21.97	29.31	28.06	22.45	13.6	24.91	22.93	23.5425	4.79425	0.203642	FALSE	588	0.329166	1	1	0	0	1	1	1	2	0.236128	-1.16221	1.52862	0.394737		1	0.451923	1	0.451923	-0.4	0.5	0.389895
COMM7	Nontoxin	Nontoxin	43	82.94	60.56	75.03	48.19	59.09	65.51	62.25	62.0712	12.9993	0.209425	FALSE	603	0.285714	0	4	3	3	0	3	4	7	-0.748414	-1.0535	-0.473206	0.259536	-0.350649		0.377778	0.0857145	0.290295	0.345614	0.1907	0.226579
COMM9	Nontoxin	Nontoxin	61.45	61.65	92.63	52.33	34.39	48.37	93.41	84.18	66.0513	21.8026	0.330085	FALSE	597	0.286111	0	1	2	2	0	2	1	3	-0.14674	0.0945699	-0.448318	0.434477	0.333333	0.333333	0.562378	0.428571	0.555556		0.296296	0.148575
COP9	Nontoxin	Nontoxin	35.35	62.62	69.06	45.63	46.56	54.49	74.72	52.69	55.14	13.067	0.236978	FALSE	1272	0.152083	0	4	0	0	0	0	4	4	-1.54972		-1.54972	0.281992		0.8	-0.0961538	0.8	-0.0961538	0.216667	0	0.0004329
COP9-1	Nontoxin	Nontoxin	13.48	28.78	24.84	19.18	19.71	23.21	25.9	13.11	21.0263	5.70641	0.271394	FALSE	1464	0.351667	0	5	0	0	0	0	5	5	0.550056		0.550056	0.100453	0	1	0.445222	-0.714286	-0.0718305	-0.0333333	0.114983	0.201707
COP9-2	Nontoxin	Nontoxin	25.77	42.33	61.79	20.18	36.18	27.95	58.35	65.3	42.2313	17.6163	0.417139	FALSE	1353	0.316667	0	3	0	0	0	0	3	3	0.147188		0.147188	0.1722	0	0	0.379819	-0.350649	0.359283	0.25641	0.196881	0.309388
COP9-4	Nontoxin	Nontoxin	21.11	48.23	27.33	24.38	28.29	28.2	44.77	20.54	30.3562	10.4394	0.343897	FALSE	1221	0.270454	0	10	1	1	0	1	10	11	-0.387517	-1.16221	-0.202532	-0.164235	-0.0714286	-1.08831	-0.166169	-0.0857142	-0.0162054	-0.429629	-0.0499499	-0.00612296
COP9-7a	Nontoxin	Nontoxin	12.1	38.4	20.22	23.82	13.79	21.34	21.91	20.64	21.5275	7.94051	0.368854	FALSE	828	0.125	0	1	0	0	0	0	1	1	-1.16221		-1.16221	-0.210526			-0.0961538		-0.0961538	-0.4	0	0.0989399
COP9-8	Nontoxin	Nontoxin	24.29	29.71	53.25	28.93	21.86	23.49	30.35	29.61	30.1863	9.87806	0.327237	FALSE	630	0.252778	0	3	0	0	0	0	3	3	-0.467388		-0.467388	-0.172097	-0.666667	-0.714286	0.0951417	-0.714286	0.0951417	-0.4	0.166667	0.0908437
COP9Signalsome-5	Nontoxin	Nontoxin	24.68	43.19	47.27	32.05	34.75	36.9	50.21	28.79	37.23	8.99707	0.241662	FALSE	1014	0.236111	0	3	0	0	0	0	3	3	-0.627713		-0.627713	0.0376677	0	-0.428571	0.0307876	-0.428571	0.198928	0.022222	0.0555557	0.172382
Copine3	Nontoxin	Nontoxin	52.69	61.76	39.38	50.81	33.64	56.78	68.76	49.35	51.6462	11.3595	0.219949	FALSE	1623	0.161111	0	2	1	1	0	1	2	3	-1.34917	-1.16221	-1.03789	-0.101921	-0.166666	-0.428571	0.0556681	-0.428571	0.0177126	-0.4	0.0555557	0.0302703
Corn4	Nontoxin	Nontoxin	31.13	42.56	46.57	28.6	39.32	34.76	41.58	40.41	38.1162	6.10096	0.160062	FALSE
Cornichon	Nontoxin	Nontoxin	40.22	90.31	63.44	59.34	54.74	55.63	80.98	57.98	62.83	15.8075	0.251592	FALSE
Coronin1B	Nontoxin	Nontoxin	13.23	36.46	21.01	22.88	16.36	19.94	19.72	18.57	21.0212	6.89836	0.328161	FALSE	1476	0.281944	0	5	1	1	0	1	5	6	-0.220587	-1.16221	0.130871	0.0597477	-0.166667	-0.305974	0.179661	0.0818182	0.26807	-0.181818	0.161508	0.0683398
Cortactin	Nontoxin	Nontoxin	14.57	25.36	34.83	21.66	21.59	26.18	23.95	23.42	23.945	5.66208	0.236462	FALSE	1542	0.314286	0	4	3	3	0	3	4	7	0.151063	-0.814758	0.894173	0.392704	0.05	0.0122451	0.321206	0.540451	0.564034	0.44	0.177527	0.217863
COX19	Nontoxin	Nontoxin	30.59	107.05	30.78	59.16	27.66	36.92	26.01	63.95	47.765	27.9926	0.586048	FALSE	297	0.379167	0	3	1	1	0	1	3	4	0.807664	1.03439	0.494558	0.0876355	0.111111	0.536842	-0.0561883	0.136842	0.0166875	-0.060606	0.0267857	-0.129569
COX2	Nontoxin	Nontoxin	151.47	99.04	159.73	104.47	66.55	35.84	123.3	142.25	110.331	43.007	0.389799	FALSE	222	0.225	0	1	1	1	0	1	1	2	-0.648609	-1.16221	0.155746	0.127295			0.179196		0.179196	0	0.166666	0.335184
COX4	Nontoxin	Nontoxin	15.87	28.23	26.38	22.64	25.62	36.81	45.51	31.08	29.0175	9.02084	0.310876	FALSE	618	0.251852	0	1	2	2	0	2	1	3	-0.573203	-0.294714	-0.720697						0.0210527		0.0210527	0.0210527
CoxsackieRec	Nontoxin	Nontoxin	14.62	59.58	27.65	29.97	37.9	20.65	56.22	34.92	35.1887	15.8708	0.45102	FALSE	1062	0.284722	0	4	2	2	0	2	4	6	-0.189037	1.40398	-1.11717	0.00812746	0	0	0.176242	-0.311688	0.0600264	0.0703032	0.035445	0.137593
CreatineKin	Nontoxin	Nontoxin	1066.66	3829.19	143.02	1031	51.96	353.28	221.01	2393.57	1136.21	1334.25	1.1743	FALSE	1146	0.294048	0	5	2	2	0	2	5	7	-0.085562	0.200738	-0.215413	0.573163	0	1	-0.0424402	0.795918	-0.013437	0.685185	0.186508	-0.215305
CreatineKinU	Nontoxin	Nontoxin	18.65	60.32	27.93	59.48	24.89	38.53	19.34	22.54	33.96	17.1722	0.505659	FALSE	1260	0.166666	0	4	4	4	0	4	4	8	-0.0526249	-0.0430558	-0.0430558						0.0857145		0.0857145	0.0857145
Crystallin-z	Nontoxin	Nontoxin	13.58	7.92	9.64	13.84	6.54	15	13.75	19.38	12.4563	4.18793	0.336211	FALSE	993	0.261111	0	1	2	2	0	2	1	3	-0.387226	-1.49796	1.52862	0.333333	0	1	1	0.0476193	0.421053		0.333333	0.184235
CSL4	Nontoxin	Nontoxin	15.09	27.54	30.56	24.44	13.66	28.76	24.56	20.21	23.1025	6.24447	0.270294	FALSE	585	0.458333	0	1	0	0	0	0	1	1	1.03439		1.03439	-0.0326531	0	-0.272727	-0.231214	0	0.136187	1.11022e-16	-0.047619	0.0478605
CTDP2	Nontoxin	Nontoxin	12.52	32.74	23.16	18.24	22.84	19.92	29.39	24.91	22.965	6.33994	0.27607	FALSE	1401	0.370238	0	7	0	0	0	0	7	7	0.805261		0.805261	0.0667183	-0.138889	-0.254545	0.0696377	-0.0053314	0.175318	0.0533334	0.122576	0.131257
CTerminalBinding1	Nontoxin	Nontoxin	22.12	47.36	12.42	24.49	27.78	47.01	39.36	30.65	31.3988	12.3608	0.393672	FALSE	1326	0.257051	0	13	0	0	0	0	13	13	-0.56709		-0.56709	0.191394	0.0714286	0.0204083	0.0131136	0.262782	0.210797	0.144616	0.0496948	0.123629
Cullin1	Nontoxin	Nontoxin	23.99	38.4	39.15	20.62	23.89	24.55	37.92	31.43	29.9938	7.65499	0.25522	FALSE	2331	0.125	0	1	1	1	0	1	1	2	-1.49796	-1.16221	-1.16221	-0.105263	0		-0.0961538	-0.428571	0.0177126	-0.4	0	0.0174334
Cullin2	Nontoxin	Nontoxin	14.91	36.89	38.43	15.67	21.57	12.87	37.8	21.35	24.9362	10.9976	0.441027	FALSE	2238	0.125	0	2	0	0	0	0	2	2	-1.49796		-1.49796	0.27451	0	0.0857145	0.131579	0.6		0.666667	0	-0.0640732
Cullin3	Nontoxin	Nontoxin	44.71	67.87	65.95	55.24	72.79	59.18	93.31	45.48	63.0663	15.8709	0.251655	FALSE	2307	0.245238	0	6	1	1	0	1	6	7	-0.656245	-1.16221	-0.409889	0.163385	-0.125	-0.10026	0.117174	0.369023	0.287154	0.0666668	0.173593	0.0827576
CuUptake1	Nontoxin	Nontoxin	15.31	23.95	16.3	13.18	23.4	13.43	18.42	6.23	16.2775	5.77902	0.355031	FALSE	579	0.265	0	3	2	2	0	2	3	5	-0.397667	0.0945699	-0.654434	0.176765	0	0.348371	-0.0936835	1	0.0460471	0.0092308	0.0644112	0.00594038
CWC15	Nontoxin	Nontoxin	31.4	84.6	36.55	53	36.95	52.94	52.56	46.88	49.36	16.583	0.335961	FALSE	693	0.233333	0	2	0	0	0	0	2	2	-0.57783		-0.57783	0.122137			0.172414		0.172414	8.88178e-17	0.166667	0.347826
CXorf56	Nontoxin	Nontoxin	24.09	68.25	32.72	48.25	32.08	37.24	50.2	34.77	40.95	13.9733	0.341228	FALSE	669	0.221429	0	7	0	0	0	0	7	7	-0.934628		-0.934628	0.0750267	-0.111111	-0.218182	-0.0480146	0.21974	0.00016932	0.058586	-0.005291	-0.00120154
CycCO6B1	Nontoxin	Nontoxin	429.03	390.62	679.26	497	275.89	242.16	673.14	719.05	488.269	186.206	0.381361	FALSE
CycKinInh1	Nontoxin	Nontoxin	12.09	34.32	27.7	34.59	10.97	18.23	33.19	43.01	26.7625	11.7233	0.438049	FALSE	450	0.291666	0	1	1	1	0	1	1	2	-0.0823774	-1.16221	1.03439	-0.0183065	-0.333333	0.473684	-0.163684	0.473684	-0.163684	0.133333	-0.0714285	0.024577
Cyclin-H1	Nontoxin	Nontoxin	10.46	14.13	16.5	11.37	10.74	7.9	15.95	17.67	13.09	3.46821	0.264951	FALSE	963	0.258333	0	2	1	1	0	1	2	3	-0.413947	-1.16221	0.200738	0.0919677	-0.5	0.285714	-0.0202429	0	0.0192308	0.133333	0.148148	-0.0431978
Cyclin-I	Nontoxin	Nontoxin	22.59	42.3	14.19	34.47	11.98	20.31	28.25	49.15	27.905	13.2526	0.474919	FALSE	1152	0.210361	0	3	4	4	0	4	3	7	-0.66197	-1.53785	0.416577	0.146301	0.363636		-0.0787878	0.309091	-0.0326831	-0.00808067	-0.0425565	-0.0317482
CyclinDepKin-5	Nontoxin	Nontoxin	16.72	22.13	5.45	22.1	18.18	21.69	13.14	23.15	17.82	6.0538	0.339719	FALSE	879	0.26511	0	8	0	0	0	0	8	8	-0.463923		-0.463923	0.337428	-0.222857		0.222222	0.312567	0.145191	0.688889	-0.00405779	0.0165619
CyclinY	Nontoxin	Nontoxin	18.5	27.47	24.11	24.22	22.07	24.61	49.66	26.64	27.16	9.50164	0.34984	FALSE	1104	0.333333	0	1	0	0	0	0	1	1	-0.0334055		-0.0334055						-0.428571		-0.428571	-0.428571
CysGlutTrans	Nontoxin	Nontoxin	7.86	35.64	4.81	1.89	24.12	3.98	20.77	8.69	13.47	12.022	0.892499	FALSE	1506	0.238095	0	6	1	1	0	1	6	7	-0.73976	-0.448318	-0.709617	0.00638974	0	1	0.183124	-1	0.0950887	-0.338462	0.126984	0.12761
CysGly1	Nontoxin	Nontoxin	43.55	48.54	63.14	53.48	31.82	46.91	108.1	97.45	61.6237	27.0312	0.438648	FALSE	582	0.125	0	0	1	1	0	1	0	1	-1.16221	-1.16221		0	0	-0.428571	0.131579				0	-0.0640732
CysProt-ATG4A	Nontoxin	Nontoxin	19.03	22.46	13.89	18.57	23.12	16.73	13.03	14.32	17.6438	3.8401	0.217647	FALSE	1158	0.3875	0	2	2	2	0	2	2	4	0.894173	0.943917	0.519243	0.336018	0.25	0.214285	0.364296	0.536842	0.387347	0.139316	0.235161	0.364101
CysProt-ATG4C	Nontoxin	Nontoxin	12.24	14.71	19.76	12.61	13.33	20.36	24.34	11.87	16.1525	4.69036	0.29038	FALSE	1374	0.247222	0	3	3	3	0	3	3	6	-0.614966	-0.627713	-0.413947	0.14986	0.291667	-0.214285	0.0564361	1	0.390501	-0.0444443	0.107407	0.145134
CysString	Nontoxin	Nontoxin	3.46	17.23	12.1	15	13.17	13.08	17	7.67	12.3388	4.70047	0.380952	FALSE	561	0.3625	0	2	0	0	0	0	2	2	0.519243		0.519243	-0.053315	-0.25	-1	0.04626	0.428571	0.229701	-0.4	0.108333	-0.034215
CystathioneBSyn	Nontoxin	Nontoxin	40.84	73.66	61.88	38.33	28.78	49.15	60.53	50.35	50.44	14.5479	0.28842	FALSE	1659	0.375	0	6	2	2	0	2	6	8	0.880873	0.554633	0.867898	0.109849	0.314286	0.0401914	-0.0280922	0.195918	0.111209	-0.189277	0.000992125	-0.011526
CystathioneLyase	Nontoxin	Nontoxin	49.94	57.89	32.12	41.2	25.41	43.69	47.01	22.45	39.9637	12.3404	0.308791	FALSE	1218	0.137362	0	2	2	2	0	2	2	4	-1.15395	-1.35784	-0.264521	-0.144988	-0.428571		-0.4	0.0857145	-0.0202429	-0.2	0.0443382	-0.0497598
Cystatin	Nontoxin	Nontoxin	101.08	222.52	132.45	174.1	88.6	148.89	142.23	136.48	143.294	41.7402	0.291291	FALSE	411	0.429167	0	2	2	2	0	2	2	4	1.32672	0.377685	1.79326	0.252982	0	0.266986	0.46814	0.051948	0.255472	-0.060606	0.330068	0.320283
CystatinB	Nontoxin	Nontoxin	53.21	108.67	119.72	138.45	46.1	66.45	98.85	80.84	89.0363	32.8837	0.369329	FALSE	297	0.125	0	2	0	0	0	0	2	2	-1.49796		-1.49796	-0.105263	0	-0.428571	0.0177126		-0.0961538	-0.4	0	0.0174334
CystNeph	Nontoxin	Nontoxin	21.44	28.16	20.53	23.22	18.06	34.76	55.71	24.72	28.325	12.2122	0.431146	FALSE	1110	0.248168	0	10	2	2	0	2	10	12	-0.416396	-0.264521	-0.402476	-0.142992	-0.746032		-0.466667	-0.731428	0.0169805	0.155556	-0.0624465	-0.0177921
Cyt-b561	Nontoxin	Nontoxin	19.64	73.31	50.51	29.54	24.12	36.03	47.33	42.92	40.425	17.2076	0.425667	FALSE	765	0.327778	0	3	0	0	0	0	3	3	0.254071		0.254071	0.306126	0	0.285714	0.150224	0.333333	0.0572041	0.666667	0.0675381	0.0092556
CytB-c1-2	Nontoxin	Nontoxin	71.15	117.01	126.64	140.79	99.78	111.16	115.35	93.42	109.412	21.3472	0.195108	FALSE	1365	0.28141	0	10	3	3	0	3	10	13	-0.255368	-0.387226	-0.171593	-0.0938121	-0.05	0.254545	0.000820723	-0.527273	-0.0583071	-0.198601	0.0199095	0.0684053
Cytb-c1-6	Nontoxin	Nontoxin	328.84	316.33	426.64	260.88	201.27	249.95	355.73	272.26	301.488	70.4848	0.23379	FALSE	273	0.5	0	1	0	0	0	0	1	1	1.30896		1.30896	0.182741	0	0.473684	-0.21978	1	0.204082	-0.153846	0.298246	-0.156502
CytB-c1-8	Nontoxin	Nontoxin	171.51	293.63	256.75	291.23	133.19	160.33	276.49	247.11	228.78	63.9227	0.279407	FALSE	246	0.125	0	1	1	1	0	1	1	2	-1.49796	-1.16221	-1.16221	-0.210526			-0.0961538		-0.0961538	-0.4	0	0.0989399
CytB-c1-9	Nontoxin	Nontoxin	879.17	374.55	106.59	727.22	357.64	474.58	789.63	630.51	542.486	260.027	0.479325	FALSE	189	0.233333	0	0	1	1	0	1	0	1	-0.448318	-0.448318		-0.4375			-0.2		-0.2	-1	0	0.189189
Cytb5	Nontoxin	Nontoxin	148.45	164.99	235.21	118.69	102.8	199.38	247.43	115	166.494	55.6464	0.334225	FALSE	423	0.458333	0	1	0	0	0	0	1	1	1.03439		1.03439	0.737357			0.75431		0.75431	0.666667	0.533333	0.852002
CytBRed1	Nontoxin	Nontoxin	85.69	201.29	25.77	80.11	52.78	90.57	169.89	90.51	99.5763	58.1403	0.583877	FALSE	828	0.272894	0	5	1	1	0	1	5	6	-0.352905	-0.264521	-0.31993	-0.0233533	-0.376623		-0.0574358	-0.0171426	0.00391407	-0.0384615	0.0986646	0.0305943
CytC	Nontoxin	Nontoxin	234.09	187.54	234.32	88.41	139.5	76.19	236.9	130.88	165.979	66.3501	0.399751	FALSE
CytC-c1-1	Nontoxin	Nontoxin	85.55	109.16	143.11	104.83	75.35	105.36	131.21	82.84	104.676	23.6173	0.225623	FALSE	1449	0.3425	0	8	2	2	0	2	8	10	0.509059	-1.49796	1.14256	0.344457	0.619048	0.485714	0.112146	-0.0107604	0.278669	0.207408	-0.0448351	0.0876492
CytcCOIV	Nontoxin	Nontoxin	197.37	257.85	355.71	237.25	105.74	169.43	276.98	304.61	238.118	79.3292	0.333151	FALSE	513	0.329166	0	2	0	0	0	0	2	2	0.236128		0.236128	-0.00350263	0	-0.214285	0.0469925	-0.272727	0.157729	-0.181818	0.0294118	0.00391225
CytCCuChap	Nontoxin	Nontoxin	382.9	66.43	33.07	349.64	111.7	266.41	482.52	753.17	305.73	242.057	0.791736	TRUE
CytCO5B	Nontoxin	Nontoxin	326.05	326.09	384.14	399.26	252.95	400.82	280.49	655.35	378.144	124.483	0.329195	FALSE	378	0.233333	0	1	0	0	0	0	1	1	-0.448318		-0.448318	0.224719	0	0.6		-0.272727	0.131579	0.666667	-0.142857	0.0559441
CytCO6A1	Nontoxin	Nontoxin	298.22	488.13	184.86	532.27	262.37	637.27	314.75	491.74	401.201	157.125	0.391636	FALSE	327	0.2	0	1	0	0	0	0	1	1	-0.720697		-0.720697					0.6		0.6	-0.0961538	-0.0961538
CytCO7A	Nontoxin	Nontoxin	26.16	89.55	58.54	69.52	33.06	55.16	93.94	50.3	59.5288	24.2149	0.406777	FALSE	351	0.216667	0	2	1	1	0	1	2	3	-0.814758	0.649981	-1.49796	0.0860217	0		0.368421	-0.428571	0.210526	0	0.111111	0.168667
CytCO7A2	Nontoxin	Nontoxin	188.74	182.98	255.96	135.65	130.53	185.03	250.79	197.65	190.916	45.7698	0.239738	FALSE
CytCO7C	Nontoxin	Nontoxin	1070.04	932.19	1105.39	656.41	524.63	799.51	1148.42	1181.08	927.209	244.151	0.263318	FALSE
CytCOVIIb	Nontoxin	Nontoxin	443.29	307.29	492.14	270.84	198.06	295.4	393.98	517.68	364.835	114.239	0.313126	FALSE	240	0.325	0	1	0	0	0	0	1	1	0.155746		0.155746	0.676056	0.666667			0.473684	0.742188		0.222222	0.0542698
CytCRed-CBP3	Nontoxin	Nontoxin	27.25	19.62	31.58	25.69	14.61	36.82	33.26	19.9	26.0912	7.65464	0.29338	FALSE	897	0.125	0	1	0	0	0	0	1	1	-1.16221		-1.16221	-0.210526			-0.0961538		-0.0961538	-0.4	0	0.0989399
Cytidylyltransferase	Nontoxin	Nontoxin	15.23	14.82	17.22	24.73	17.99	22.78	18.29	13.72	18.0975	3.87043	0.213865	FALSE	1104	0.305785	0	9	2	2	0	2	9	11	-0.0297827	-0.609287	0.158889					0.0345086	0.218862	0.254701	0.0819976	0.182576
CytP4502-20A1	Nontoxin	Nontoxin	44.06	57.07	53.5	57.02	50.6	50.82	49.83	65.85	53.5938	6.50014	0.121285	FALSE	1404	0.146667	0	2	3	3	0	3	2	5	-1.69167	-1.69654	-1.03789	-0.101888	0		-0.0290118	-0.428571	0.00310632	-0.3	0.0333334	0.116114
d3PGDH	Nontoxin	Nontoxin	102.29	179.85	76.78	88.06	51.81	69.17	123.97	136.17	103.512	41.6103	0.401983	FALSE	1599	0.263542	0	3	5	5	0	5	3	8	-0.452479	-0.379442	-0.413947	-0.0402638	-0.142857	-0.542857	0.089279	-0.225974	0.0423449	0.0777778	0.00228171	0.00227227
DAD1	Nontoxin	Nontoxin	335.77	375.88	270.77	533.99	533.78	688.14	493.68	289.38	440.174	145.594	0.330766	FALSE	375	0.4	0	1	0	0	0	0	1	1	0.649981		0.649981	-0.346604	-0.5	-0.428571	-0.231214	-1	-0.15748	-0.4	-0.025641	-0.179775
DAZ-2	Nontoxin	Nontoxin	24.61	72.74	54.92	71.55	29.18	34.82	69.65	73.07	53.8175	21.0985	0.392038	FALSE	507	0.125	0	1	0	0	0	0	1	1	-1.16221		-1.16221	-0.210526			-0.0961538		-0.0961538	-0.4	0	0.0989399
DB1CUL4	Nontoxin	Nontoxin	12.46	41.64	14.5	24.06	18.82	26.83	20.83	16.11	21.9062	9.30949	0.42497	FALSE	1353	0.268446	0	14	0	0	0	0	14	14	-0.192254		-0.192254	-0.00638408	-0.077153		-0.031515	-0.035844	0.120394	-0.406349	0.13824	0.0839464
DCN1-5	Nontoxin	Nontoxin	12.66	35.06	24.89	15.1	15.75	16.66	19.48	12.57	19.0212	7.61231	0.4002	FALSE	705	0.4	0	0	1	1	0	1	0	1	0.649981	0.649981		-0.0805369	0		0.204082	-0.428571	-0.21978	-0.153846	-0.025641	0.214373
DDB1-7	Nontoxin	Nontoxin	16.17	21.1	24.22	16.02	17.77	20.12	45.46	26.89	23.4688	9.66541	0.411842	FALSE	1029	0.125	0	2	0	0	0	0	2	2	-1.49796		-1.49796	0	0			-0.428571	0.131579		0	-0.0640732
DDB1-CUL4-11	Nontoxin	Nontoxin	19	36.55	6.34	22.63	15.64	24.2	34.84	28.87	23.5087	10.039	0.427034	FALSE	1623	0.241758	0	8	3	3	0	3	8	11	-0.776133	-0.839843	-0.626682	-0.072345	-0.376623		-0.0487179	-0.428571	0.108749	-0.128205	0.0930994	0.196793
DDB1-CUL4-8	Nontoxin	Nontoxin	25.65	38.08	11.81	35.61	27.59	51.36	36.98	27.02	31.7625	11.5966	0.365103	FALSE	1821	0.371795	0	12	1	1	0	1	12	13	0.795553	1.43099	0.624295					0.542857	0.395485	-0.0852525	0.371331	0.109689
DDPOS	Nontoxin	Nontoxin	185.42	224.34	256.53	221.61	213.13	237.33	408.16	264.43	251.369	68.0393	0.270675	FALSE	1797	0.276042	0	4	4	4	0	4	4	8	-0.302945	-1.11717	0.59139	0.160114	0.0666667	0.511278	0.184815	0.348371	0.0975852	-0.0435897	0.149306	0.161724
DDPOS48	Nontoxin	Nontoxin	241.18	306.75	189.82	257.93	285.55	367.76	295.11	278.74	277.855	51.7795	0.186354	FALSE	1314	0.267677	0	12	0	0	0	0	12	12	-0.502425		-0.502425					0.282707	-0.0844551	0.212121	-0.171096	0.0051587
DDPOSGT-STT3B	Nontoxin	Nontoxin	141.51	160.36	156.46	51.26	144.79	76.98	158.31	115.92	125.699	41.1198	0.32713	FALSE	2448	0.3125	0	2	0	0	0	0	2	2	0.0945699		0.0945699	0.34277	0	0.6	0.561358	-0.2	-0.323194	0.555555	-0.0416666	0.0818104
DDPOSPGT-STT3A	Nontoxin	Nontoxin	204.87	173.14	239.4	186.68	200.63	202.17	136.67	185.13	191.086	29.4624	0.154184	FALSE	2118	0.319792	0	8	0	0	0	0	8	8	0.220427		0.220427	0.217816	-0.0666666	0.160191	0.247838	0.151169	0.164194	0.292064	0.10625	0.195626
DDPOSPGT2	Nontoxin	Nontoxin	380.27	325.3	439.31	277.5	252.51	295.74	375.12	455.22	350.121	74.5553	0.212941	FALSE	1893	0.193055	0	5	1	1	0	1	5	6	-1.2302	-1.16221	-1.03556	0.0497433	-0.111111	0.215038	0.0242501	0.215038	0.0242501	-0.0333333	0.0555555	-0.000909767
Deacylase1	Nontoxin	Nontoxin	22	44.04	27.45	21.64	19.05	24.22	28.31	41.54	28.5312	9.33193	0.327078	FALSE	624	0.125	0	0	1	1	0	1	0	1	-1.16221	-1.16221		-0.210526			-0.0961538		-0.0961538	-0.4	0	0.0989399
DEAD41	Nontoxin	Nontoxin	33.55	42.39	47.34	41.26	41.99	64.1	45.88	23.32	42.4787	11.6569	0.274418	FALSE	1917	0.351042	0	6	2	2	0	2	6	8	0.594264	1.26242	0.189567	0.102636	-0.0555555	-0.130576	0.194091	-0.136363	0.118843	0.107936	0.0910847	0.164419
DeathAscKin2	Nontoxin	Nontoxin	13.05	20.34	4.49	15.95	12.99	20.43	15.2	25.5	15.9938	6.31998	0.395153	FALSE	1221	0.24495	0	9	3	3	0	3	9	12	-0.50254	-0.168885	-0.543235					0.167857	0.162964	-0.0442306	0.105784	0.0510822
DeathAss1	Nontoxin	Nontoxin	382.54	427.86	695.64	589.78	298.38	499.03	569.16	448.28	488.834	126.744	0.259279	FALSE
Decorin	Nontoxin	Nontoxin	161.22	30.49	145.69	36.06	24.79	45.63	135.62	46.45	78.2438	58.2087	0.743941	FALSE	1065	0.197222	0	2	1	1	0	1	2	3	-1.0018	-0.448318	-1.03789	0.264431		0.6	0.172414	0.6	0.172414	0.222222	0.111111	0.210526
DehydrocholesterolRed	Nontoxin	Nontoxin	34.15	123.25	101.1	91.34	51.11	72.84	115.5	82.3	83.9488	30.6438	0.36503	FALSE	1425	0.261111	0	7	2	2	0	2	7	9	-0.490576	-1.49796	-0.0159664	0.0470433	0.433333	0.550239	0.050452	0.542857	-0.0902368	-0.296296	0.0866572	0.0361604
DehydrodolichylDiPSyn	Nontoxin	Nontoxin	7.71	15.37	13.1	15.92	12.47	13.87	14.08	9.82	12.7925	2.78028	0.217336	FALSE	1005	0.4125	0	2	0	0	0	0	2	2	0.943917		0.943917	0.216719	0	0.6	0.329078	-0.2	0.298415	-0.2	0.261111	0.194311
DensityReg	Nontoxin	Nontoxin	31.76	59.14	55.66	38.4	39.53	49.51	51.58	63.33	48.6137	11.068	0.227672	FALSE	591	0.423333	0	4	1	1	0	1	4	5	1.33375	1.03439	1.17533	-0.303913	-0.2	-0.136363	-0.0554472	-1.20571	-0.447111	-0.516239	-0.163175	-0.0798031
Derlin1	Nontoxin	Nontoxin	34.96	86.61	85.73	59.44	72.59	114.61	99.9	46.65	75.0613	26.9754	0.359378	FALSE	756	0.251389	0	6	0	0	0	0	6	6	-0.567641		-0.567641	-0.0109233	-0.266667	-0.318296	0.166205	-0.345865	0.177173	-0.4	0.152116	0.0689677
Derlin2	Nontoxin	Nontoxin	84.96	146.79	138.22	63.06	88.33	134.16	146.34	72.28	109.267	35.401	0.323985	FALSE	720	0.525	0	1	0	0	0	0	1	1	1.4737		1.4737	-0.110345	-0.5	-1.8	-0.15748	-0.272727	0.396601	1.11022e-16	0.111111	0.188614
DES1	Nontoxin	Nontoxin	49.83	46.22	115.01	103.38	20.58	43.09	129.19	44.06	68.92	40.4368	0.586721	FALSE	972	0.125	0	4	1	1	0	1	4	5	-1.9286	-1.16221	-1.83088	-0.0421052	0	-0.428571	0.0860324		-0.0961538	-0.4	0	-0.0314706
DET1	Nontoxin	Nontoxin	26.74	78.45	48.38	27.57	36.05	28.37	50.74	50.57	43.3588	17.5932	0.405759	FALSE
DevRegGTP1	Nontoxin	Nontoxin	16.32	35.75	28.7	28.62	21.33	29.49	33.5	25.2	27.3637	6.31234	0.230683	FALSE	1104	0.202083	0	4	0	0	0	0	4	4	-1.03066		-1.03066	0.425792	0.5	0.542857	0.379819	0.6	0.204082	0.393163	0.0972222	0.10016
DH-SDR	Nontoxin	Nontoxin	22.65	30.83	19.82	43.11	13.63	29.92	26.84	26.39	26.6487	8.71263	0.326943	FALSE	798	0.326599	0	7	2	2	0	2	7	9	0.69257	1.84438	0.0546014					0.636842	-0.00837063	-0.0499999	-0.0262968	0.0122025
Diablo	Nontoxin	Nontoxin	21.62	45.1	15.45	44.43	24.28	34.12	26.72	31.44	30.395	10.5522	0.347168	FALSE	726	0.28	0	3	2	2	0	2	3	5	-0.233638	1.79326	-1.69654	0.174422	-0.25	0.0666667	0.111654	0.311278	0.236866	0.0666668	0.166667	0.0981015
DiacylglycerolLipase-a	Nontoxin	Nontoxin	6.43	21.57	22.79	10.22	9.02	37.29	26.9	4.68	17.3625	11.5648	0.666078	FALSE	3093	0.368518	0	6	3	3	0	3	6	9	0.818384	-1.34917	1.94061	0.260727	-0.333333	0.552632	0.217052	-0.178571	-0.0723542	0.380952	0.0987653	-0.0479024
dickkopf3	Nontoxin	Nontoxin	23	9.73	35.23	20.08	6.51	12.46	35.42	15.59	19.7525	10.9675	0.555245	FALSE	840	0.245	0	3	2	2	0	2	3	5	-0.616373	0.200738	-1.05524	-0.0199069	-0.166667	-0.714286	0.0723371	-0.428571	0.0934173	0.05	-0.00592594	0.151936
DiGeorge2	Nontoxin	Nontoxin	13.73	28.42	12.99	10.88	15.12	24.47	21.17	13.68	17.5575	6.32347	0.360158	FALSE	1638	0.219048	0	12	2	2	0	2	12	14	-1.06222	-0.648609	-1.05601	-0.0609755	0	0.0857145	-0.0392351	-0.0874457	-0.0544763	-0.351515	0.00838565	-0.0108951
DihydRed	Nontoxin	Nontoxin	29.7	56.04	29.51	53.26	22.83	55.57	59.74	48.37	44.3775	14.6038	0.329081	FALSE	723	0.142857	0	1	0	0	0	0	1	1	-1.0535		-1.0535	-0.105	-0.428571			-0.428571	0.131579		0.0569106	-0.044586
DihydrolipoylDH	Nontoxin	Nontoxin	23.22	39.14	30.8	37.51	26.28	34.18	31.9	28.73	31.47	5.42211	0.172294	FALSE	1527	0.212222	0	13	2	2	0	2	13	15	-1.15875	-1.03789	-1.07569	0.0855089	0.0285714	-0.216326	0.102901	0.163308	0.128701	-0.0469136	0.08	0.0868831
Dimethylaminohydrolase1	Nontoxin	Nontoxin	58.57	87.57	74.84	67.34	58.52	67.85	99.51	69.97	73.0212	14.1627	0.193954	FALSE	861	0.207143	0	5	2	2	0	2	5	7	-1.10166	-1.49796	-0.671049	0.21545	0	-0.0171426	0.153537	0.6	0.287413	0.289231	0.0743526	0.140988
Dioxygenase	Nontoxin	Nontoxin	51.28	53.64	36.91	56.54	41.51	37.57	65.92	71.57	51.8675	12.7973	0.246731	FALSE	543	0.142857	0	2	3	3	0	3	2	5	-1.74821	-1.53785	-1.35784	0.184726			-0.4	0.6	-0.0961538	0.24	-0.044586	-0.00398736
Dipeptidase	Nontoxin	Nontoxin	60.58	46.16	94.5	48.77	52.78	67.67	91.71	43.19	63.17	20.0959	0.318124	FALSE	1431	0.255952	0	5	2	2	0	2	5	7	-0.530973	-1.03789	-0.160737	0.0336812	0	-0.27619	0.17397	-0.085714	0.073991	-0.249572	0.104273	0.119483
DipeptidylPeptidase3	Nontoxin	Nontoxin	18.62	37.53	24.61	29.23	28.24	40.57	28.38	23.13	28.7888	7.25807	0.252115	FALSE	2181	0.30868	0	20	4	4	0	4	20	24	0.0989951	0.569763	-0.0293506	0.220408	0.0833334	0.246688	0.338006	0.106794	0.184867	-0.144108	0.212699	0.102137
DiphosphomevalonateDecarb	Nontoxin	Nontoxin	16.28	28.47	7.75	45.44	12.17	46.46	19.22	22.53	24.79	14.4802	0.584114	TRUE	1221	0.323077	0	2	3	3	0	3	2	5	0.203772	0.0675714	0.306184	0.56331	0.6		0.6	0.6	0.634615	0.311111	0.281156	0.25437
DJ1	Nontoxin	Nontoxin	165.46	233.2	147.82	353.51	126.4	214.07	234.85	316.2	223.939	79.5799	0.355364	FALSE	570	0.260833	0	6	4	4	0	4	6	10	-0.501607	-0.598115	-0.331013	0.117452	0	0.2	0.186739	-0.171428	0.162517	0.0161173	0.11746	0.212354
DMAT	Nontoxin	Nontoxin	11.63	18.03	19.27	10.45	13.56	10.79	16.41	18.52	14.8325	3.65328	0.246302	FALSE	927	0.255555	0	3	3	3	0	3	3	6	-0.520315	-0.467388	-0.413947	-0.0367731	0	-0.350649	0.062528	0	0.133513	-0.208205	0.0868945	0.246611
DMNOF5	Nontoxin	Nontoxin	20.51	18.94	17.1	31.09	36.02	30.33	37.13	10.1	25.1525	9.8212	0.390466	FALSE	1599	0.319167	0	6	4	4	0	4	6	10	0.220297	-0.554861	0.741697	0.145182	-0.0555555	-0.542857	0.0252417	-0.00408157	0.235547	0.107323	0.0472223	0.0905234
DNADamage4	Nontoxin	Nontoxin	3.05	46.18	6.46	22.22	3.53	3.42	13.77	21.58	15.0262	14.883	0.990464	FALSE	669	0.142857	0	2	0	0	0	0	2	2	-1.35784		-1.35784	0.223816	-0.428571	0.0857145	0.131579			0.666667	0.0061623	-0.044586
DnaDorRMAPolII	Nontoxin	Nontoxin	44.72	80.78	63.33	61.95	41.71	123.33	58.43	30.55	63.1	28.8302	0.456898	FALSE	378	0.3	0	4	1	1	0	1	4	5	-0.014933	-0.448318	0.158843	-0.0260982	-0.277778	-0.833766	0.136316	-0.033766	0.107895	0.0833335	0.0663004	0.229919
dnaJ-A1	Nontoxin	Nontoxin	71.29	46.52	54.86	42.47	44.93	57.89	71.31	20.07	51.1675	16.7872	0.328083	FALSE	1194	0.152083	0	3	1	1	0	1	3	4	-1.54972	-1.16221	-1.34917	0	0	-1	0.25	-0.428571	0.131579		0	-0.0810736
dnaJ-B1	Nontoxin	Nontoxin	53.35	34.75	34.55	40.02	27.96	29.91	37.6	32.02	36.27	7.93181	0.218688	FALSE	1008	0.125	0	1	0	0	0	0	1	1	-1.16221		-1.16221	0	0			-0.428571	0.131579		0	-0.0640732
DnaJ-B11	Nontoxin	Nontoxin	358.51	509.85	451.85	230.56	428.21	559.37	571.52	304.58	426.806	121.982	0.285801	FALSE	1077	0.220833	0	2	2	2	0	2	2	4	-0.836016	-0.330104	-1.03789	0.217722		0.6	0.0874125	0.6	0.0874125	0.0666667	0.166667	0.0540767
dnaJ-B14	Nontoxin	Nontoxin	34.4	31.9	30.51	24.79	35.51	32.31	53.08	23.65	33.2687	9.05224	0.272094	FALSE	1140	0.152083	0	2	2	2	0	2	2	4	-1.54972	-1.03789	-1.49796	0.167789	0	-0.085714	0.145191	0.6	0.172414	0.333334	0.0416668	0.0389016
dnaJ-B9	Nontoxin	Nontoxin	249.34	473.65	474.66	260.18	580.91	502.93	580.58	268.86	423.889	142.333	0.335779	FALSE	648	0.175	0	2	2	2	0	2	2	4	-1.31182	-0.648609	-1.49796	-0.0933782	0	-0.428571	-0.0392206	0.428571	0.0667737	-0.4	0.0833332	0.119336
dnaJ-C15	Nontoxin	Nontoxin	27.82	76.31	47.95	64.7	49.99	88.08	93.23	57.18	63.1575	22.0064	0.348437	FALSE	462	0.344322	0	2	1	1	0	1	2	3	0.381676	-1.0535	1.18442	-0.187034	-0.285714		-0.118519	-0.285714	-0.0970759	-0.266667	0.00475933	-0.112797
dnaJ-C3-1	Nontoxin	Nontoxin	267.83	444.77	358.36	163.75	332.52	332.28	333.32	204.34	304.646	89.5633	0.293991	FALSE	1512	0.325926	0	6	3	3	0	3	6	9	0.299314	1.13586	-0.252138	0.194506	0.125	0.285714	0.1695	0.0502392	0.239433	0.102273	0.136626	0.251591
dnaJ-C3-2	Nontoxin	Nontoxin	11.6	25.53	24.41	24.28	24.21	35.36	48.66	28.32	27.7962	10.6699	0.383861	FALSE	1557	0.19375	0	12	4	4	0	4	12	16	-1.40798	-1.03066	-1.3993	0.0516588	-0.194444	-0.0857141	0.0161519	-0.00389588	0.0667865	0.0599607	0.0402674	0.0892106
dnaJA2	Nontoxin	Nontoxin	56.4	148.19	77.83	97.91	72.96	94.47	146.78	94.99	98.6912	33.1245	0.335638	FALSE	1236	0.125	0	2	0	0	0	0	2	2	-1.49796		-1.49796	0.169247		0.6	-0.0961538	0.6	-0.0961538	0.133333	0	0.0174334
DnaJC1	Nontoxin	Nontoxin	16.52	61.3	41.38	21.29	29.91	22.45	34.03	35.53	32.8012	14.1816	0.43235	FALSE	1677	0.227083	0	1	3	3	0	3	1	4	-0.771134	-0.387226	-1.16221	0.471878		0.733333	0.451923	0.733333	0.451923	0.311111	0.25	0.162911
DnaJC21	Nontoxin	Nontoxin	47.67	79.58	76.17	48.57	56.51	73.81	97.67	47.37	65.9188	18.6268	0.282572	FALSE	1602	0.284615	0	8	5	5	0	5	8	13	-0.214352	-0.379442	-0.0661811	0.27121	0	0.32381	0.335052	0.0906358	0.246643	0.240559	0.160915	0.271371
DnaJTid1	Nontoxin	Nontoxin	20.01	26.24	18.84	23.94	18.24	29.13	37.49	20.65	24.3175	6.54062	0.268967	FALSE	1194	0.171296	0	7	2	2	0	2	7	9	-1.58514	-1.03789	-1.54707	-0.117042	-0.0833332	-0.428571	-0.0185737	-0.428571	-0.00169112	-0.358974	0.0273369	0.0742126
DNALyase	Nontoxin	Nontoxin	8.46	33.12	17.58	15.6	14.02	20.18	17.04	22.15	18.5187	7.19272	0.388402	FALSE	951	0.213333	0	4	1	1	0	1	4	5	-0.962656	-1.16221	-0.684625	0.207494	0.166667	-0.428571	0.263245	0	0.336323	0.133333	0.14	0.175748
DNAPol-b	Nontoxin	Nontoxin	32.74	72.42	48.63	66.27	46.6	39.89	40.78	67.77	51.8875	14.8959	0.28708	FALSE	1008	0.200926	0	7	2	2	0	2	7	9	-1.22404	-0.648609	-1.25477	-0.0527431	-0.111111	0.0857145	0.0070731	-0.033766	-0.074719	-0.305555	0.0442496	0.0788621
DnaPolD4	Nontoxin	Nontoxin	8.3	30.24	13.28	9.78	11.6	12.7	14.89	9.33	13.765	7.01186	0.509398	FALSE	333	0.125	0	0	1	1	0	1	0	1	-1.16221	-1.16221		0.54902		0.6		0.6		0.666667	0	-0.0640732
DolicholPMannosyltrans	Nontoxin	Nontoxin	27.1	32.27	33.99	25.63	28.06	42.31	46.66	31.44	33.4325	7.45704	0.223048	FALSE	726	0.5	0	2	0	0	0	0	2	2	1.6871		1.6871	0.446219	0.0833335	0.736842	0.411894	0.451128	0.189672	0.444444	0.361111	0.149087
DolichPmbReg	Nontoxin	Nontoxin	13.73	24.08	30.52	5.6	14.49	19.49	30.62	16.27	19.35	8.68436	0.448804	FALSE	255	0.125	0	0	1	1	0	1	0	1	-1.16221	-1.16221		0	0	-0.428571	0.131579				0	-0.0640732
Dolichylphosphatase1	Nontoxin	Nontoxin	21.05	38.39	30.23	22.29	26.94	43.35	39.32	25.68	30.9062	8.42218	0.272507	FALSE	717	0.285714	0	6	1	1	0	1	6	7	-0.182996	0.155746	-0.252138	0.0962888	0.133333	-0.757576	0.195142	0.194805	0.0960426	0.106667	0.0206349	0.105937
DPbGT	Nontoxin	Nontoxin	70.36	109.22	113.4	109.17	75.08	101.58	97.82	91.13	95.97	16.0543	0.167285	FALSE	957	0.386111	0	2	1	1	0	1	2	3	0.815206	0.649981	0.660801	0.421966	0	0.163636	0.434664	0.3	0.57599	0.444445	0.366911	0.505855
DPCD	Nontoxin	Nontoxin	51.7	37.85	62.73	41.59	26.78	48.88	42.62	44.03	44.5225	10.5139	0.236148	FALSE	612	0.3125	0	1	1	1	0	1	1	2	0.0945699	-1.16221	1.30896	0.157811	0		0.329078	-0.428571	0.150224	0.133333	0.149123	0.385182
DPH3	Nontoxin	Nontoxin	31.46	10.31	43.57	23.94	13.05	6.94	21.81	15.5	20.8225	12.1495	0.583481	FALSE
DPIPPPH1	Nontoxin	Nontoxin	12.34	33.35	28.86	34.69	15.11	37.53	28.41	28.89	27.3975	9.05841	0.330629	FALSE
DPP4a	Nontoxin	Nontoxin	69.98	86.76	123.46	54.77	75.05	71.19	112.14	100.39	86.7175	23.4864	0.270838	FALSE	2259	0.264394	0	8	3	3	0	3	8	11	-0.463496	-1.0018	-0.140948	0.225013	-0.047619	-0.0176044	0.218507	0.214286	0.175535	0.4	0.0837497	0.0817104
Dpy30	Nontoxin	Nontoxin	74.08	145.73	118.59	119.24	74.8	119.78	157.59	160.18	121.249	33.4478	0.275861	FALSE
Dpyr5CarSyn	Nontoxin	Nontoxin	25.52	34.84	27.09	30.61	25.76	44.43	32.26	14.39	29.3625	8.65256	0.294681	FALSE	2400	0.334259	0	8	1	1	0	1	8	9	0.400871	-1.16221	0.706415	-0.0447192	-0.296296	-0.673469	0.135923	-0.644805	0.116033	0.266667	0.0666667	0.132343
drebrin1	Nontoxin	Nontoxin	39.98	52.89	33.49	43.95	35.04	53.45	45.82	39.66	43.035	7.4636	0.173431	FALSE	1386	0.179167	0	1	3	3	0	3	1	4	-1.26856	-1.34917	-0.448318	0.0610685	0	-0.428571	0.158802	-0.428571	0.158802	8.88178e-17	0.0833335	0.141876
DualMitKinKin4	Nontoxin	Nontoxin	8.84	21.26	16.69	16.21	11.42	12.92	16.4	14.97	14.8388	3.78624	0.255159	FALSE	1185	0.233333	0	1	0	0	0	0	1	1	-0.448318		-0.448318	1		1		1		1	0	-0.132075
DualSpecKin-CLK3	Nontoxin	Nontoxin	18.12	49.41	20.33	28.07	39.23	41.97	34.7	24.16	31.9987	11.1344	0.347964	FALSE	1488	0.295238	0	7	0	0	0	0	7	7	-0.0716429		-0.0716429	0.0682189	0.1	0.381818	0.193688	0.163636	0.0975852	-0.174359	0.154195	0.217523
DualSpecPP1	Nontoxin	Nontoxin	103.24	205.35	106.54	156.83	262.75	93.16	208.46	100.64	154.621	64.1561	0.414924	FALSE	1110	0.249084	0	5	1	1	0	1	5	6	-0.620761	0.381009	-0.843633	0.087382	0.0476193		-0.088889	0.0476193	0.0692797	0.0666667	0.0157065	-0.0446457
Dynactin-5	Nontoxin	Nontoxin	3.57	16.7	11.92	22.59	22.52	36.48	30.98	19.39	20.5187	10.3479	0.504313	FALSE	549	0.401099	0	2	0	0	0	0	2	2	0.814637		0.814637	0.368397	0.428571		0	0.5	-0.323194	-0.055555	-0.0589235	-0.0589235
Dynactin2	Nontoxin	Nontoxin	21.88	32.14	40.21	35.11	19.36	32	46.72	27.79	31.9012	9.05226	0.283759	FALSE	1215	0.169048	0	5	2	2	0	2	5	7	-1.54707	-1.03789	-1.49119	0.101023	0.125	0.0476193	-0.00506068	0.333333	0.0797347	-0.0444443	0.0555556	-0.0315998
Dynactin3	Nontoxin	Nontoxin	33.01	50.01	45.69	42.41	25.28	62.04	53.73	58.82	46.3738	12.5777	0.271225	FALSE	570	0.290909	0	5	0	0	0	0	5	5	-0.185037		-0.185037					0.568421	0.117383	0.449231	-0.0315999	0.0333334
Dynamin2	Nontoxin	Nontoxin	9.94	21.2	23.99	13.55	15.19	16.86	26.7	16.71	18.0175	5.57332	0.309328	FALSE	2607	0.24	0	3	2	2	0	2	3	5	-0.671049	0.0945699	-1.05524	0.286596	0	0.257143	0.345142	-0.6	0.384615	0.483334	0.0933334	0.205013
Dynein1	Nontoxin	Nontoxin	26.33	48.78	44.79	31.8	28.06	36.19	46.95	30.46	36.67	8.95883	0.244309	FALSE	1830	0.258333	0	7	0	0	0	0	7	7	-0.503135		-0.503135	-0.0957974	-0.166667	-0.2	0.0960213	-0.631169	-0.0177494	-0.193939	0.03356	-0.0362356
DyneinLight1	Nontoxin	Nontoxin	119.52	230.84	158.74	142.26	141.41	214.24	153.4	70.89	153.913	50.6366	0.328996	FALSE	270	0.525	0	1	0	0	0	0	1	1	1.4737		1.4737	0.77292		1	0.75431	1	0.75431	-0.4	0.857143	0.450324
DyneinLight2	Nontoxin	Nontoxin	58.92	105.11	113.08	89.51	90.91	117.36	129.29	67.8	96.4975	24.4231	0.253095	FALSE	270	0.125	0	1	0	0	0	0	1	1	-1.16221		-1.16221	0	0	-0.428571	0.131579				0	-0.0640732
DyneinLightRdblk2	Nontoxin	Nontoxin	228.93	340.7	405.99	329.15	196.57	283.42	382.07	287.94	306.846	71.9818	0.234586	FALSE	291	0.125	0	1	0	0	0	0	1	1	-1.16221		-1.16221	-0.210526			-0.0961538		-0.0961538	-0.4	0	0.0989399
DyneinTctex1	Nontoxin	Nontoxin	65.86	83.54	67.93	64.85	64.47	74.43	79.57	45.05	68.2125	11.7717	0.172574	FALSE
e2FPhos	Nontoxin	Nontoxin	8.71	21.83	32.8	17.86	12.7	19.53	26.94	27.92	21.0363	8.06264	0.383274	FALSE	870	0.325	0	0	1	1	0	1	0	1	0.155746	0.155746		0.465116			0.454545		0.454545	0.4	0.333333	0.571429
E3UFM1Lig1	Nontoxin	Nontoxin	47.95	60.98	80.55	54.01	29.73	38.04	61.36	150.09	65.3388	37.5935	0.575363	FALSE	2385	0.236905	0	6	8	8	0	8	6	14	-0.831793	-0.975851	-0.47299	0.0365348	-0.0416666	-0.0142855	0.113854	0.0448981	0.117385	-0.25	0.119157	0.0727067
EAPT1	Nontoxin	Nontoxin	15.67	19.58	22.01	18.14	13.91	17.23	19.51	20.11	18.27	2.6048	0.142573	FALSE
EDRK1	Nontoxin	Nontoxin	704.4	992.22	795.84	786.99	517.44	677.15	1181.02	1143.11	849.771	234.304	0.275726	FALSE
EF-1a1	Nontoxin	Nontoxin	3397.07	3740.18	5934.09	5181.43	2153.98	2711.49	8757.1	9438.65	5164.25	2725.56	0.527774	FALSE	1389	0.294048	0	7	0	0	0	0	7	7	-0.085562		-0.085562	0.141165	0	0.8	0.344265	-0.106767	0.136312	-0.083916	0.180691	0.160833
EF-1a2	Nontoxin	Nontoxin	101.04	512.49	31.57	113.61	19.34	27.37	18.71	254.43	134.82	172.194	1.27721	FALSE	1392	0.300521	0	16	0	0	0	0	16	16	-0.0110521		-0.0110521	0.0499602	-0.030303	-0.330612	0.244022	-0.523809	0.0478974	0.0374645	0.0894809	0.204044
EF-1b	Nontoxin	Nontoxin	521.98	1044.69	793.3	858.18	408.48	494.17	1324.85	1235.71	835.17	346.994	0.415477	FALSE	675	0.258333	0	2	1	1	0	1	2	3	-0.413947	1.4737	-1.49796	-0.106957	-0.25	-0.714286	-0.0959229	0.473684	0.0307876	-0.2	0.037037	-0.0389481
EF-1d	Nontoxin	Nontoxin	139.67	294.59	107.28	393.91	116.79	224.91	346.52	517.22	267.611	147.288	0.55038	FALSE	912	0.168333	0	5	5	5	0	5	5	10	-1.64634	-1.21781	-1.69167	-0.103533	0	-0.428571	-0.0535496	-0.428571	0.015495	-0.371429	0.0190477	0.0860954
EF-1g	Nontoxin	Nontoxin	277.38	696.3	329.43	750.05	249.63	361.53	793.46	972.24	553.752	279.69	0.505082	FALSE	1299	0.336667	0	9	1	1	0	1	9	10	0.436868	0.649981	0.34445	0.025312	-0.138889	-0.461224	0.0245407	0.0489797	0.205667	-0.0671718	0.107222	0.134545
EF-2	Nontoxin	Nontoxin	717.78	1364.92	465.11	1236.05	562.58	897.63	1180.39	1365.47	973.741	361.949	0.37171	FALSE	2577	0.232895	0	19	0	0	0	0	19	19	-0.910031		-0.910031	0.0842268	-0.119048	-0.0129869	0.0298756	0.325188	0.102719	-0.0312664	0.100677	0.0752257
EF-B2	Nontoxin	Nontoxin	129.05	314.08	150.16	271.49	141.05	226.15	234.83	205.03	208.98	65.8952	0.315318	FALSE	360	0.233333	0	3	0	0	0	0	3	3	-0.654434		-0.654434	0.510638	0.5			0.428571	0.555556		0.166667	0.0559441
EF-SPT4	Nontoxin	Nontoxin	79.95	61.32	79.9	49.33	58.84	93.18	90.01	59.35	71.485	16.2904	0.227886	FALSE	354	0.327778	0	3	0	0	0	0	3	3	0.254071		0.254071	0.0181514	-0.333333	-0.272727	0.168176	-0.272727	0.168176	-0.184615	0.185185	0.315475
EF1	Nontoxin	Nontoxin	75.02	74.71	105.22	36.64	50.2	69.36	94.9	63.6	71.2062	22.1762	0.311437	FALSE
EF1-e-1	Nontoxin	Nontoxin	53.55	55.83	57.67	66.32	53.43	62.96	95.02	48.25	61.6287	14.6362	0.23749	FALSE	543	0.307692	0	4	2	2	0	2	4	6	0.70367	0.306184	0.800483	0.0123304	-0.68		0.133333	-1	-0.05561	0.216667	-0.156218	-0.0077236
EF2Kin	Nontoxin	Nontoxin	21.6	46.8	23.15	45.96	8.8	27.75	20.24	46.27	30.0713	14.4858	0.481717	FALSE	2178	0.185417	0	10	2	2	0	2	10	12	-1.46972	-1.49796	-1.28539	0.0909015	0	-0.085714	0.212506	-0.442857	0.164118	0.266667	0.0361111	0.022708
EGK06895	Nontoxin	Nontoxin	47.04	65.29	41.27	68.45	33.84	43.52	47.39	58.1	50.6125	12.1404	0.239869	FALSE	483	0.494505	0	0	1	1	0	1	0	1	1.24172	1.24172		0.622222	0		0.666667	0.428571	0.555556	1	-0.0510949	0.56038
EHDomain-4	Nontoxin	Nontoxin	13.96	18.59	14.86	20.19	15.84	19.06	19.82	14.2	17.065	2.61515	0.153247	FALSE	1626	0.225757	0	10	1	1	0	1	10	11	-0.947861	-1.16221	-0.810994	0.202463	-0.0266666	0.348371	0.089136	0.323308	0.130778	0.177778	0.0656565	0.0573646
EIF1AD	Nontoxin	Nontoxin	28.63	32.13	54.92	37.66	44.57	41	70.31	38.32	43.4425	13.4584	0.309797	FALSE	507	0.125	0	1	0	0	0	0	1	1	-1.16221		-1.16221	-0.210526			-0.0961538		-0.0961538	-0.4	0	0.0989399
ElastaseInhib	Nontoxin	Nontoxin	7.66	15.07	16.09	10.73	14.41	15.42	17.11	11.18	13.4587	3.24845	0.241363	FALSE	1143	0.236905	0	5	2	2	0	2	5	7	-0.753679	0.519243	-1.25426	0.163143	0.25	0.257143	0.129534	0.542857	0.21433	-0.168205	0.146825	0.169542
ElecTransferFlava	Nontoxin	Nontoxin	23.68	52.6	31.51	43.11	24.26	45.9	35.75	28.79	35.7	10.5912	0.296673	FALSE	1014	0.2	0	6	3	3	0	3	6	9	-1.23533	-1.69654	-0.725392	0.198994	0	0.27347	-0.0041572	0.8	0.0112733	0.234921	0.0635803	-0.0505653
ElectronTransFlavo	Nontoxin	Nontoxin	31.68	46.57	27.01	39.84	30.99	40.84	29.37	24.23	33.8163	7.73506	0.228738	FALSE	774	0.19	0	4	1	1	0	1	4	5	-1.21781	-0.448318	-1.26856	0.00654598	-0.111111	-0.27619	0.0473179	-0.085714	-0.0652629	-0.0444443	0.004762	-0.0339502
ELL-2	Nontoxin	Nontoxin	97.53	220.75	253.47	172.49	190.68	185.52	271.81	190.16	197.801	53.5295	0.270623	FALSE	795	0.279166	0	2	0	0	0	0	2	2	-0.188546		-0.188546	0.184939	0.0833335	-0.214285	0.343568	0.0857145	0.131579	0.666667	0.0500002	0.118234
Elongation1	Nontoxin	Nontoxin	10.74	24.37	30.3	54.5	17.33	20.79	31	26.88	26.9887	13.0194	0.4824	FALSE	864	0.21875	0	2	2	2	0	2	2	4	-0.857644	-1.49796	0.0945699	0.363388	0.2	0.257143	0.323017	0.557895	0.0177126	0.483334	-0.0208333	0.106162
EMP2	Nontoxin	Nontoxin	2.53	29.97	8.38	9.02	13.93	25.5	9.28	9.44	13.5063	9.3836	0.69476	FALSE	504	0.183333	0	4	0	0	0	0	4	4	0.430062		0.430062						0.565789		0.565789	0.565789
emp24-2	Nontoxin	Nontoxin	285.37	424.92	279.51	344.58	340.2	569.86	484.9	339.3	383.58	101.78	0.265343	FALSE	606	0.166667	0	1	0	0	0	0	1	1	-0.912045		-0.912045						-0.0961538	-0.4	-0.123967	-1.14492e-16
emp24-9	Nontoxin	Nontoxin	228.98	271.37	327.53	179.73	287.3	359.73	384.55	273.02	289.026	67.3249	0.232937	FALSE	675	0.179167	0	3	1	1	0	1	3	4	-1.26856	-1.16221	-1.0018	0.0610685	0	-0.428571	0.151997		0.172414	8.88178e-17	0.0833335	0.141876
EndophilinB1	Nontoxin	Nontoxin	74.71	139.09	103.32	100.26	80.12	98.84	159.19	107.35	107.86	28.3813	0.263131	FALSE	1104	0.283333	0	6	0	0	0	0	6	6	-0.204812		-0.204812	0.128083	-0.0555555	-0.335065	0.131579	-0.0545454	0.385965	0.666667	0.0700854	0.142126
Endoplasmin	Nontoxin	Nontoxin	1187.54	733.74	790.92	324.53	723.73	616.16	820.18	674.25	733.881	239.521	0.326376	FALSE	2388	0.339394	0	10	1	1	0	1	10	11	0.476743	-1.16221	0.735943	0.241783	0	0.771429	0.398743	0.123475	0.0472992	0.133333	0.231724	-0.0108877
EndothelialDiff1	Nontoxin	Nontoxin	133.77	81.95	13.22	304.98	173.62	314.62	244.45	286.41	194.128	111.631	0.575039	TRUE	447	0.288889	0	3	0	0	0	0	3	3	-0.120019		-0.120019	0.0719653	0	0.8	-0.2	0.363636	-0.356697	-0.37037	-0.008547	-0.040887
Engulfment2	Nontoxin	Nontoxin	15.47	19.9	3.55	19.67	9.47	17.37	13.48	17.23	14.5175	5.59031	0.385074	FALSE	2163	0.301775	0	9	4	4	0	4	9	13	0.650409	0.814637	0.513021	0.107882	-0.000204875		0.137545	-0.402597	0.134836	0.0964862	0.0639475	0.211988
EnhBinding-g	Nontoxin	Nontoxin	31.09	135.11	48.72	68.45	44.02	72.82	60.21	47.86	63.535	31.9444	0.502784	FALSE	453	0.272222	0	3	0	0	0	0	3	3	-0.280343		-0.280343	0.0198265	0	0.0225565	-0.190907	0	0.025	0	0.0277778	-0.167452
EnhRudimentary	Nontoxin	Nontoxin	83.91	164.51	164.47	105.67	107.06	101.07	171.82	150.5	131.126	35.0868	0.26758	FALSE	315	0.125	0	1	1	1	0	1	1	2	-1.49796	-1.16221	-1.16221	-0.210526			-0.0961538		-0.0961538	-0.4	0	0.0989399
ENTPDPHydrolase4	Nontoxin	Nontoxin	36.87	62.76	61.33	40.4	78.97	48.02	56.07	27.99	51.5512	16.4792	0.319667	FALSE	1833	0.267424	0	8	3	3	0	3	8	11	-0.425506	-0.627713	-0.265561	0.0899266	-0.0166665	-0.128776	-0.0504288	0.121531	0.0744867	0.133333	0.00216455	0.0154314
ENTPDPHydrolase6	Nontoxin	Nontoxin	80.56	89.61	59.24	59.81	40.38	65.14	69.79	78.99	67.94	15.4159	0.226905	FALSE	1299	0.171428	0	3	4	4	0	4	3	7	-1.51923	-1.26856	-1.34917	0.0205248	-0.0555555	-0.132467	0.0746458	-0.191688	0.0860324	0.311111	-0.0170067	0.0106504
ENTPDPHydrolase7	Nontoxin	Nontoxin	32.13	52.69	65.38	33.63	55.59	44.73	49.67	16.36	43.7725	15.637	0.357234	FALSE	1815	0.278646	0	12	4	4	0	4	12	16	-0.297251	-0.684625	-0.105335	0.135637	-0.138889	-0.182467	0.225978	-0.135301	0.261073	0.362963	0.135917	0.170784
Epimerase	Nontoxin	Nontoxin	46.54	35.29	40.6	34.27	35.4	38.33	166.23	61.85	57.3137	44.9371	0.784055	FALSE	1047	0.125	0	2	1	1	0	1	2	3	-1.69654	-1.16221	-1.49796	0.366013	0	0.257143	0.131579	0.6		0.666667	0	-0.0640732
EpithelCellAdh	Nontoxin	Nontoxin	125	203.7	199.3	258.18	141.88	160.14	230.32	271.58	198.762	53.4811	0.26907	FALSE	930	0.247917	0	2	2	2	0	2	2	4	-0.554861	-1.03789	0.129959	-0.131472	-0.166666	-0.428571	-0.0679323	-0.428571	-0.0180545	-0.333333	0.013889	0.102717
ER-Golgi2	Nontoxin	Nontoxin	58.68	93.35	62.28	86.47	73.63	67.99	136.97	112.81	86.5225	27.1377	0.313649	FALSE	1134	0.125	0	1	1	1	0	1	1	2	-1.49796	-1.16221	-1.16221	-0.210526			-0.0961538		-0.0961538	-0.4	0	0.0989399
ER29	Nontoxin	Nontoxin	421.11	437.39	309.45	485.99	316.99	451.6	451.83	593.66	433.502	91.184	0.210342	FALSE	786	0.325926	0	7	2	2	0	2	7	9	0.605729	-0.294714	0.898186						-0.0626748		-0.0626748	-0.0626748
ER44	Nontoxin	Nontoxin	111.35	112.08	146.68	57.04	101.79	57.83	204.57	146.79	117.266	49.019	0.418015	FALSE	1218	0.316667	0	1	1	1	0	1	1	2	0.129959	-0.448318	0.649981	-0.105263	-0.5	-1	0.25	-1	0.25		0.166666	-0.007214
ERCC-1	Nontoxin	Nontoxin	27.16	52.22	28.67	79.01	33.12	46.84	38.28	36.77	42.7587	16.9494	0.396395	FALSE	993	0.266667	0	1	5	5	0	5	1	6	0.0638009	-0.304848	0.966291					-0.428571	0.333333	0.736842	0.193448	0.290745
ERGGIC1	Nontoxin	Nontoxin	252.44	159.69	223.13	160.74	127.39	111.79	248.33	249.16	191.584	58.1749	0.303653	FALSE	873	0.125	0	2	0	0	0	0	2	2	-1.49796		-1.49796	0.54902		0.6		0.6		0.666667	0	-0.0640732
ERGIC-53	Nontoxin	Nontoxin	107	93.06	125.38	86.03	120.66	146.55	188.21	92.7	119.949	34.1862	0.285007	FALSE	1563	0.31369	0	10	4	4	0	4	10	14	0.159039	-0.684625	0.539998	0.177879	0.133333	0.771429	0.243069	0.513212	0.0942575	-0.331002	0.266587	0.160309
ErgosterolBioSyn-28	Nontoxin	Nontoxin	5.35	12.94	28.97	11.93	10.06	12.69	18.36	12.51	14.1013	6.99714	0.496207	FALSE	423	0.179167	0	2	0	0	0	0	2	2	-1.03789		-1.03789	-0.324013			-0.148077		-0.148077	-0.7	0	0.144064
Erlin1	Nontoxin	Nontoxin	17.92	50.34	22.69	36.46	24.13	38.07	30.89	26.22	30.84	10.446	0.338715	FALSE	1068	0.175	0	3	1	1	0	1	3	4	-1.31182	-1.16221	-1.05524	0.2682		0.6	0.0381301	0.6	0.0381301	0.187879	0.0833332	0.00917422
Erlin2	Nontoxin	Nontoxin	17.99	22.12	32.51	12.84	19.47	20.85	20.39	22.23	21.05	5.52408	0.262427	FALSE	1008	0.233333	0	1	0	0	0	0	1	1	-0.448318		-0.448318	0.122137			0.172414		0.172414	8.88178e-17	0.166667	0.347826
ERLumen1	Nontoxin	Nontoxin	15.52	20.01	20.16	15.54	14.66	12.13	22.21	21.38	17.7012	3.68306	0.208068	FALSE	639	0.125	0	2	0	0	0	0	2	2	-1.49796		-1.49796	-0.105263	0	-0.428571	0.0177126		-0.0961538	-0.4	0	0.0174334
ERLumenRR2	Nontoxin	Nontoxin	210.44	404.92	278.09	265.19	351.49	377.53	372.88	255.88	314.553	70.6571	0.224627	FALSE	639	0.25	0	2	1	1	0	1	2	3	-0.494109	-1.16221	0.0945699	0.0559507	0.25	0.428571	-0.0668739	-0.428571	0.198928	0.022222	0	0.11262
ERUbiq2	Nontoxin	Nontoxin	25.59	42.52	27.86	16.59	18.47	12.98	36.95	34.97	26.9912	10.5817	0.392043	FALSE	1209	0.341667	0	2	1	1	0	1	2	3	0.387675	-1.16221	1.26242	0.557557	0	0.8	0.780679	-0.2	0.405679	0.555555	0.361111	0.342593
ErythMem	Nontoxin	Nontoxin	145.14	438.81	181.59	339.62	102.2	208.03	286.4	586.29	286.01	163.447	0.571474	FALSE	1407	0.244048	0	12	2	2	0	2	12	14	-0.739623	-1.49796	-0.47504	0.0528749	-0.0641025	-0.0187011	0.0831633	-0.1312	-0.00980928	0.228572	0.0227598	-0.0222274
Etoposide	Nontoxin	Nontoxin	16.31	29.06	23.46	18.62	23.11	13.32	37.2	28.18	23.6575	7.74232	0.327267	FALSE	1011	0.261667	0	2	3	3	0	3	2	5	-0.434118	0.147188	-1.03789	0.175148	0.0555557	0.309091	0.134615	0.120779	0.127841	-0.044444	0.0796493	0.0998056
ETS	Nontoxin	Nontoxin	77.54	91.06	125.06	112.67	55.81	80.74	101.88	72.15	89.6137	22.7181	0.253511	FALSE	906	0.125	0	1	0	0	0	0	1	1	-1.16221		-1.16221	0.54902		0.6		0.6		0.666667	0	-0.0640732
ETSElf3	Nontoxin	Nontoxin	7.03	24.45	23.18	20.03	6.05	4.56	21.8	20.98	16.01	8.51866	0.532083	FALSE	1086	0.240833	1	5	4	4	1	5	5	10	-0.749116	-0.671049	-0.652823	0.0281493	0.0611112	-0.428571	0.0741086	-0.135338	0.0784335	-0.184615	0.0305556	0.128137
EukTIF3H	Nontoxin	Nontoxin	62.97	122.79	105.03	107.52	101.8	117.13	167.56	165.23	118.754	34.3819	0.289523	FALSE	1044	0.125	0	1	2	2	0	2	1	3	-1.69654	-1.49796	-1.16221	-0.0701753	0	-0.428571	0.0556681		-0.0961538	-0.4	0	-0.0097355
EukTran4E	Nontoxin	Nontoxin	61.56	70.8	105.2	60.55	60.04	66.99	116.79	76.96	77.3613	21.7542	0.281203	FALSE	654	0.125	0	1	0	0	0	0	1	1	-1.16221		-1.16221	-0.210526			-0.0961538		-0.0961538	-0.4	0	0.0989399
EvoToll	Nontoxin	Nontoxin	29.89	28.74	39.97	23.33	20.17	19.95	46.4	45.81	31.7825	10.9324	0.343975	FALSE	1275	0.225	0	0	2	2	0	2	0	2	-0.648609	-0.648609		0.092643	0	0.0857145	0.151997	0.6	0.172414	-0.181818	0.166666	0.0009151
ExchangeTrans3	Nontoxin	Nontoxin	12.56	25.01	31.08	13.5	16.74	23.13	31.92	16.66	21.325	7.60725	0.356729	FALSE	2382	0.125	0	2	0	0	0	0	2	2	-1.49796		-1.49796	0.27451	0	0.6		0.0857145	0.131579	0.666667	0	-0.0640732
Exocyst7	Nontoxin	Nontoxin	28.76	26.45	26.13	38.56	23.62	34.74	35.44	19.09	29.0988	6.62987	0.22784	FALSE	2031	0.217708	0	6	2	2	0	2	6	8	-1.00077	-1.49796	-0.599191	-0.0565054	-0.142857	-0.584962	0.0164113	-0.452381	0.059648	0.037607	0.00857848	-0.0156708
ExosomeCom2	Nontoxin	Nontoxin	11.27	25.43	18.45	24.58	18.35	40.81	44.92	13.86	24.7088	12.2252	0.494771	FALSE	891	0.326923	0	3	1	1	0	1	3	4	0.232994	-1.0535	0.800483	0.251742	0.428571		-0.076923	0.3	0.37602	0.294872	0.0899332	0.309818
Exostosin2-1	Nontoxin	Nontoxin	8	15.78	12.72	10.92	5.04	10.58	12.09	12.99	11.015	3.28759	0.298465	FALSE	996	0.191667	0	3	2	2	0	2	3	5	-1.19959	-0.0823774	-1.69654	0.27963	0	0.557895	0.323017	0.3	0.196994	0.311111	0.12	0.0547933
Ezrin	Nontoxin	Nontoxin	97.84	202.19	184.1	207.45	120.84	151.16	248.67	275.94	186.024	60.9149	0.327458	FALSE	1761	0.177083	0	8	0	0	0	0	8	8	-1.48676		-1.48676	0.0961527	0	0.309091	0.0098768	0.188572	0.0342172	0.0743592	0.00992063	0.0700779
facta2	Nontoxin	Nontoxin	104.64	139.17	165.53	120.02	72.14	93.4	164.04	140.36	124.912	33.4569	0.267842	FALSE	861	0.283333	0	3	0	0	0	0	3	3	-0.17346		-0.17346	0.354031	0	0.52381	0.0177126	0.473684	-0.0498175	0.833333	-0.0752137	-0.0631928
FactinCapa1	Nontoxin	Nontoxin	13.72	18.87	23.29	12.14	10.59	14.56	18.62	15.33	15.89	4.14104	0.260606	FALSE	861	0.140476	0	5	2	2	0	2	5	7	-1.88113	-1.49796	-1.69167	-0.074294	0	0.0857145	-0.0713765	0.0857145	-0.0713765	-0.306667	0	0.0419699
FAM107A	Nontoxin	Nontoxin	19.74	20.84	5.02	16.19	3.13	12.14	26.47	27.57	16.3875	9.10911	0.555857	FALSE	513	0.351648	0	1	1	1	0	1	1	2	0.39863	-0.264521	0.883089	-0.56682	-1		-1	-1	-0.182693	-1	-0.138322	-0.239332
FAM108A	Nontoxin	Nontoxin	15.65	37.64	10.79	23.22	16.32	19.86	16.28	20.06	19.9775	8.04172	0.402539	FALSE	906	0.225	0	4	0	0	0	0	4	4	-0.792762		-0.792762	-0.0732376	-0.333333	-0.272727	0.0358383	-0.272727	0.0358383	-0.0717948	0.0388888	0.212811
FAM122B	Nontoxin	Nontoxin	11.42	22.71	16.36	15.78	19.17	19.2	15.94	17.72	17.2875	3.29866	0.190812	FALSE	852	0.411112	0	1	1	1	0	1	1	2	0.79245	0.263379	0.966291					-0.5	0.25	0.6	0.193094	0.127273
FAM136A	Nontoxin	Nontoxin	16.44	11.6	10.48	10.29	15.49	24.47	12.54	27.48	16.0987	6.52811	0.405504	FALSE	417	0.234848	0	1	1	1	0	1	1	2	-0.609287	-0.0334055	-0.912045					-0.428571	0.151997	8.88178e-17	0.131058	0.125
FAM158A	Nontoxin	Nontoxin	27.06	56.84	58.48	58.18	51.81	69.19	45	26.18	49.0925	15.442	0.314549	FALSE	633	0.335119	0	11	5	5	0	5	11	16	-0.166952	1.00225	-0.63727	0.0196988	-0.103333	0.0115244	0.0792121	-0.133371	0.0449563	-0.130536	0.086023	0.0784248
FAM168B	Nontoxin	Nontoxin	11.34	23.92	16.97	11.75	12.29	10.88	31.81	29.03	18.4988	8.56247	0.462867	FALSE
FAM18B1	Nontoxin	Nontoxin	66.75	55.72	80.47	62.13	64.15	102.29	101.05	59.01	73.9463	18.6057	0.251611	FALSE
FAM195B	Nontoxin	Nontoxin	14.98	26.59	19.28	21.92	14.21	19.65	24.86	13.6	19.3863	4.89965	0.252738	FALSE	294	0.125	0	1	1	1	0	1	1	2	-1.49796	-1.16221	-1.16221	0.54902		0.6		0.6		0.666667	0	-0.0640732
FAM32A	Nontoxin	Nontoxin	142.98	260.35	199.01	254.91	154.37	263.62	172.83	231.69	209.97	49.2607	0.234609	FALSE	345	0.197222	0	3	0	0	0	0	3	3	-1.0018		-1.0018	-0.175296			-0.0412466		-0.0412466	-0.466667	0.0555557	0.211985
FAM36A	Nontoxin	Nontoxin	36.76	34.56	44.65	19.91	14.2	39.93	19.2	20.61	28.7275	11.4831	0.399724	FALSE	354	0.165	0	3	2	2	0	2	3	5	-1.49119	-0.648609	-1.69654	-0.005048	0	0.6	0.0381301	-0.171428	0.0941994	-0.290909	0.0666666	-0.00547526
FAM3A	Nontoxin	Nontoxin	28.33	40.7	55.94	32.82	22.37	34.25	32.03	28.14	34.3225	10.2295	0.298041	FALSE	696	0.19375	0	3	1	1	0	1	3	4	-1.11717	-1.16221	-0.814758	-0.157894	-0.166666	-0.350649	-0.0729856	-0.272727	-0.141174	-0.266667	-0.0277778	0.0179327
FAM3B	Nontoxin	Nontoxin	17.41	58.31	90.72	43.22	17.06	68.78	86.2	92.2	59.2375	30.8952	0.521549	FALSE	705	0.152083	0	2	2	2	0	2	2	4	-1.54972	-1.49796	-1.03789	-0.076441	-0.111111	-0.428571	0.0177126	-0.428571	0.0746458	-0.4	0.0416668	0.0066844
FAM3C	Nontoxin	Nontoxin	28.66	48.4	51.4	29.89	38.3	50.92	51.76	35.2	41.8163	9.91688	0.237154	FALSE	684	0.233333	0	3	0	0	0	0	3	3	-0.654434		-0.654434	0.414758		1	0.172414	1	0.172414	0.333333	0.111111	0.187859
FAM3D	Nontoxin	Nontoxin	11.86	12.7	31.34	27.12	5.81	19.92	53.91	14.84	22.1875	15.2991	0.689536	FALSE	684	0.291208	0	2	0	0	0	0	2	2	-0.109822		-0.109822	-0.193131	-0.5	-0.272727	0	-1.8	0	0.0857145	-0.0372152	0.199129
FAM50A	Nontoxin	Nontoxin	76.85	74.08	72.68	73.67	77.73	85.06	157.47	95.19	89.0913	28.6369	0.321433	FALSE	1014	0.125	0	0	1	1	0	1	0	1	-1.16221	-1.16221		-0.210526			-0.0961538		-0.0961538	-0.4	0	0.0989399
FAM54B	Nontoxin	Nontoxin	10.29	27.42	13.04	19.47	13.37	20.6	26.64	12.74	17.9462	6.60556	0.368075	FALSE	861	0.225	0	4	0	0	0	0	4	4	-0.792762		-0.792762	0.131868		0.6	0.104003	0.6	0.104003	-0.0102562	0.111111	0.245138
FarnesylPPSyn	Nontoxin	Nontoxin	3.67	40.64	5.14	27.06	18.98	18.63	53.13	14.95	22.775	17.02	0.747309	FALSE	1047	0.223333	0	3	2	2	0	2	3	5	-0.853303	-0.330104	-1.0018	-0.00162322	-0.166666	0.0225565	-0.0239057	0.285714	0.00310632	-0.0333333	0.0615386	0.084375
FattyAcidBind	Nontoxin	Nontoxin	144.29	65.37	171.3	243.09	77.52	100.77	166.32	69.12	129.723	62.6894	0.483258	FALSE	408	0.325	0	1	0	0	0	0	1	1	0.155746		0.155746	0.465116			0.454545		0.454545	0.4	0.333333	0.571429
FattyCoAReductase1	Nontoxin	Nontoxin	46.22	44.01	44.32	53.92	33.37	47.04	70.56	88.21	53.4562	17.6079	0.329389	FALSE	1548	0.352778	0	2	1	1	0	1	2	3	0.494558	-0.448318	0.943917	0.362423	0.388889	0.209843	0.373844	0	-0.037594	-0.181818	0.107407	0.0167353
FBiP1	Nontoxin	Nontoxin	223.34	276.27	211.96	251.97	106.74	228.93	384.56	483.06	270.854	115.117	0.425015	FALSE	1017	0.361667	0	4	1	1	0	1	4	5	0.659408	0.155746	0.721154	0.212264	-0.111111	-0.0253245	0.0858665	0.124675	0.168462	0.265859	0.065098	0.149774
FBox-WD-2	Nontoxin	Nontoxin	19.42	51.1	24.75	25.93	25.99	35.46	46.25	26.78	31.96	11.2812	0.35298	FALSE	1365	0.24	0	4	1	1	0	1	4	5	-0.671049	-1.16221	-0.338587	0.168412	-0.111111	-0.0181817	-0.0515661	0.124675	0.0299243	0.233333	-0.0233333	-0.0895438
FBox4	Nontoxin	Nontoxin	17.76	34.19	27.69	29.79	26.53	23.43	40.94	27.62	28.4938	6.91951	0.242843	FALSE	1200	0.31875	0	3	2	2	0	2	3	5	-0.707875		-0.707875	0.271813	0.166667	0.6	0.483319	-0.233766	0.338252	0.277778	0.163889	0.263483
FBox9	Nontoxin	Nontoxin	21.75	29.39	32.66	34.74	13.77	23.23	35.58	36.13	28.4062	8.06772	0.284012	FALSE	1299	0.213333	0	5	0	0	0	0	5	5	-0.962656		-0.962656	-0.0661158	0	-0.714286	-0.131696	-0.214285	0.0178857	-1	-0.0285714	-0.104781
FBoxRR5	Nontoxin	Nontoxin	15.3	40.79	33.34	34.99	25.82	40.41	48.35	30.2	33.65	10.1741	0.302352	FALSE	2085	0.125	0	1	0	0	0	0	1	1	-1.16221		-1.16221	-0.210526			-0.0961538		-0.0961538	-0.4	0	0.0989399
Ferredoxin1	Nontoxin	Nontoxin	38.47	50.48	45.84	52.72	41.06	60.24	51.59	26.86	45.9075	10.3279	0.224972	FALSE	522	0.179167	0	0	2	2	0	2	0	2	-1.03789	-1.03789		-0.210526	0		-0.0961538	-0.428571	-0.163684	-0.4	-0.0714285	-0.0147735
FerritinA	Nontoxin	Nontoxin	135.13	543.57	241.48	335.31	203.32	171.82	675.37	368.66	334.332	190.167	0.568796	FALSE	537	0.125	0	0	1	1	0	1	0	1	-1.16221	-1.16221		0	0	-0.428571	0.131579				0	-0.0640732
FerritinHeavy	Nontoxin	Nontoxin	224.64	701.89	403.48	625.88	296.06	380.29	597.94	437.57	458.469	167.911	0.366242	FALSE	549	0.316667	0	2	0	0	0	0	2	2	0.129959		0.129959	0.0521665		1	-0.013793	1	-0.013793	-0.277778	0.208334	0.004707
FerritinLight	Nontoxin	Nontoxin	321.77	573.32	415.46	268.81	502.64	216.41	626.76	616.12	442.661	160.987	0.36368	FALSE	534	0.208333	0	3	2	2	0	2	3	5	-1.01733	-1.03789	-0.707875	0.0830353	0	0.163636	-0.0516513	0.0666667	0.0575266	0.0666668	0.0200001	0.0234487
FeS1-CDGSH	Nontoxin	Nontoxin	49.52	92.91	82.77	49.77	41.11	51.51	75.88	35.89	59.92	20.9706	0.349976	FALSE	327	0.329166	0	0	2	2	0	2	0	2	0.236128	0.236128		0.394737		1	0.451923	1	0.451923	-0.4	0.5	0.389895
FeSCluster1	Nontoxin	Nontoxin	40.75	86.58	43.17	51.32	45.11	54.04	52.25	50.15	52.9213	14.388	0.271875	FALSE	390	0.225	0	4	0	0	0	0	4	4	-0.792762		-0.792762	0.0968819	0	-0.2	0.0192308	0.309091	-0.163684	0.233333	-0.0666667	-0.0110594
FGFR1	Nontoxin	Nontoxin	82.33	128.83	116.25	101.73	111.67	168.83	166.12	76.54	119.038	34.4488	0.289394	FALSE	645	0.227778	0	2	1	1	0	1	2	3	-0.707875	-0.448318	-0.648609	0.0531173	-0.333333	-0.428571	0.163323	-0.428571	0.163323	0	0.166667	0.242104
fhl3	Nontoxin	Nontoxin	10.87	20.38	6.73	17.95	13.54	11.33	8.61	18.04	13.4312	4.91475	0.365919	FALSE	840	0.228022	0	6	2	2	0	2	6	8	-0.903373	-1.35784	-0.538344	0.00120214	0.0995673		-0.0777777	0.0857145	-0.00755563	-0.274074	0.0423825	-0.00046485
FibronectinIII-3B	Nontoxin	Nontoxin	13.69	28.22	24.09	4.56	17.86	12.08	44.98	8.18	19.2075	13.0302	0.678391	FALSE	3636	0.279687	0	7	9	9	0	9	7	16	-0.283622	-0.772679	0.373769	-0.0386938	-0.255556	-0.275036	0.0894322	-0.677922	-0.0204206	-0.00404033	0.0119048	0.0491981
FKBP3	Nontoxin	Nontoxin	38.34	34.33	67.59	34.28	23.27	32.3	33.76	56.35	40.0275	14.5124	0.362561	FALSE	669	0.161111	0	2	1	1	0	1	2	3	-1.34917	-1.16221	-1.03789	-0.140351	0		-0.0961538	-0.428571	-0.0652629	-0.4	-0.047619	-0.0312068
FKBP7	Nontoxin	Nontoxin	32.08	16.04	32.92	8.94	11.35	16.06	28.16	14.78	20.0412	9.52459	0.475249	FALSE	666	0.4	0	2	0	0	0	0	2	2	0.837748		0.837748	0.120621	0.583333	0.428571	-0.209674	0.473684	0.0983005	-0.7	-0.123931	-0.179775
Flotillin1	Nontoxin	Nontoxin	8.92	33.62	14.16	14.54	12.34	20.53	21.4	14.89	17.55	7.66436	0.436716	FALSE	1290	0.163542	0	6	2	2	0	2	6	8	-1.64876	-1.49796	-1.4195	-0.116039	-0.0555555	-0.428571	-0.104631	-0.428571	-0.0178483	-0.4	-0.0261905	-0.0400343
Flotillin2	Nontoxin	Nontoxin	13.65	16.95	5.18	20.39	12.06	28.41	19.47	19.59	16.9625	6.86418	0.404668	FALSE	1287	0.286935	0	8	1	1	0	1	8	9	-0.209163	1.24172	-0.512751	0.249191	-0.214285		0.162963	0.3	0.306491	0.238889	0.158888	0.257226
Follistatin1	Nontoxin	Nontoxin	24.38	21.99	29.78	9.36	13.18	23.67	23.38	18.98	20.59	6.56467	0.318828	FALSE	948	0.391667	0	3	0	0	0	0	3	3	0.868648		0.868648	0.46764	0	1	0.634615	0.473684	0.462741	-0.4	0.571429	0.406293
Forkhead-I1ema	Nontoxin	Nontoxin	12.35	30.35	29.01	36.12	14.28	30.32	24.4	20.79	24.7025	8.35786	0.338341	FALSE	1116	0.369792	0	4	4	4	0	4	4	8	0.818567	0.245352	1.17533	0.400051	0	-0.428571	0.543459	-0.285714	0.466159	0.533333	0.245546	0.407591
FRG1	Nontoxin	Nontoxin	20.39	34.43	40.93	41.04	16.38	34.9	46.73	56.19	36.3738	13.113	0.360506	FALSE	768	0.291666	0	3	1	1	0	1	3	4	-0.100686	1.03439	-0.627713	-0.0476191	0	0.6	0.204082	-0.350649	-0.0441005	-0.8	0.0833335	-0.0120719
FrucBiPAldolaseB	Nontoxin	Nontoxin	62.25	29.94	85.78	59.17	47.95	43.54	89.72	74.09	61.555	20.8825	0.33925	FALSE	1095	0.294792	0	5	3	3	0	3	5	8	-0.0786423	1.02897	-0.816852	0.0360951	0.0277778	-0.366233	0.101705	0.146104	0.160599	-0.103419	0.0667791	0.129794
Fucosyltransferase	Nontoxin	Nontoxin	22.03	45.75	25.81	43.14	30.41	33.49	42.81	44.4	35.98	9.2545	0.257212	FALSE	1731	0.304167	0	3	1	1	0	1	3	4	0.0290785	0.155746	-0.0398569	0.2465	0	0.619047	0.0595011	0.348371	-0.0614516	0.148718	0.0784313	-0.00809678
Fumarylacetoacetase	Nontoxin	Nontoxin	8.26	25.84	27.02	14.55	9.38	4.72	9.8	23.42	15.3737	8.7969	0.572202	FALSE	1257	0.320833	0	2	2	2	0	2	2	4	0.202097	-0.330104	0.660801	0.313252	0.5	0.428571	0.37602	0.285714	0.234694	-0.076923	0.0625	0.084222
FumarylacetoacetateHyd2A	Nontoxin	Nontoxin	96.95	137.93	91.16	162.61	151.85	134.33	98.2	146.28	127.414	27.8929	0.218916	FALSE	963	0.202083	0	4	0	0	0	0	4	4	-1.03066		-1.03066	-0.000187475	-0.111111	-0.428571	0.155747	-0.428571	0.155747	-0.153846	0.0972222	0.10016
Fused-1	Nontoxin	Nontoxin	1.21	9.76	7.71	136.89	6.35	0.91	11.66	5.38	22.4837	46.3788	2.06277	FALSE	588	0.422222	0	2	3	3	0	3	2	5	1.13692	1.27373	0.520659				-0.288461		-0.319658		0.0848928	0.0848928
G3PDH	Nontoxin	Nontoxin	23.67	60.86	71.65	83.95	41.18	71.44	63.79	57.75	59.2863	19.0126	0.320691	FALSE	1050	0.26875	0	4	0	0	0	0	4	4	-0.338587		-0.338587	-0.00333663	0	0.163636	-0.0115262	-0.033766	0.0913923	-0.193939	0.0754386	0.0511212
G3PTrans	Nontoxin	Nontoxin	64.48	100.01	90.71	63.66	29.96	18.5	88.45	42.58	62.2937	29.9351	0.480548	FALSE	1578	0.292424	0	9	2	2	0	2	9	11	-0.112093	0.943917	-0.434155	0.133356	0.219048	0.131328	0.163368	0.0206424	0.0694382	0.0029915	0.0565774	0.0937805
G6PI1	Nontoxin	Nontoxin	28.06	17.91	34.32	16.65	16.07	18.6	21.41	23.01	22.0037	6.34654	0.28843	FALSE
G6PNATrans	Nontoxin	Nontoxin	15.96	18.23	49.62	24.39	14.08	43.72	55.53	27.89	31.1775	16.208	0.519862	FALSE	573	0.438889	0	3	0	0	0	0	3	3	1.3229		1.3229	-0.0581987	-0.277778	-0.038961	-0.0135597	-0.224242	0.0219503	-0.133333	0.101852	0.0070795
GABA2	Nontoxin	Nontoxin	34	96.99	35.25	65.78	30.44	63.48	52.81	62.65	55.175	22.1959	0.402282	FALSE	354	0.125	0	1	0	0	0	0	1	1	-1.16221		-1.16221	0.54902		0.6		0.6		0.666667	0	-0.0640732
GABARec	Nontoxin	Nontoxin	287.54	830.27	310.96	638.61	427.58	626.75	754.69	518.94	549.418	198.626	0.361521	FALSE	357	0.161111	0	3	0	0	0	0	3	3	-1.34917		-1.34917	-0.0701753	0	-0.428571	0.0177126	-1	0.0769231	-0.4	0	-0.0324028
GADD45	Nontoxin	Nontoxin	23.97	33.65	24.25	45.39	30.45	58.54	40.96	32.97	36.2725	11.6406	0.32092	FALSE	516	0.4	0	1	1	1	0	1	1	2	0.837748	0.649981	0.649981	0.541833			0.561358		0.561358	0.444444	0.416667	0.704097
Galactosyltransferase1	Nontoxin	Nontoxin	36.73	44.88	48.03	21.89	48.21	24.27	64.51	29.18	39.7125	14.4368	0.363533	FALSE	1023	0.290424	0	4	3	3	0	3	4	7	-0.160271	0.102472	-0.331966	0.312533	0.357143		0.278205	0.257143	0.18625	0.355898	-0.00625347	0.154702
GammaSecretase	Nontoxin	Nontoxin	48.09	92.84	32.11	112.03	93.52	136.16	101.75	72.04	86.0675	33.9772	0.394773	FALSE	765	0.415152	0	10	1	1	0	1	10	11	1.00144	1.13811	0.847643					-0.111923	0.242534	0.111325	0.144548	0.216277
GangliosideGM2	Nontoxin	Nontoxin	53.71	75.44	61.13	36.06	15.83	33.6	121.24	37.99	54.375	32.6933	0.601256	FALSE	627	0.525	0	1	0	0	0	0	1	1	1.4737		1.4737	0.326656	0	-1	-0.15748	1	0.75431	-0.4	0.454545	0.113453
GAPDH	Nontoxin	Nontoxin	672.11	2651.27	1051.34	891.64	352.61	442.13	721.64	1400.91	1022.96	738.039	0.721477	FALSE	1002	0.225	0	1	1	1	0	1	1	2	-0.648609	-1.16221	0.155746	-0.01262		0.6	0.0381301	0.6	0.0381301	-0.290909	0.166666	0.0824216
GapJunction-g1	Nontoxin	Nontoxin	11.7	19.94	19.01	10.76	15.88	16.26	18.53	12.44	15.565	3.54912	0.22802	FALSE	1140	0.326667	0	5	0	0	0	0	5	5	0.276674		0.276674	0.352628	0.5	0.428571	0.337475	0.642857	-0.0392206	0.483334	-0.123016	0.0625814
GBinding	Nontoxin	Nontoxin	62.34	79.5	27.41	73.07	71.4	83.49	84.28	61.33	67.8525	18.5102	0.272801	FALSE	1023	0.191667	0	5	0	0	0	0	5	5	-1.19959		-1.19959	-0.0826274	0	0.0857145	-0.200464	0.514285	-0.152914	-0.306667	-0.0285714	0.0066277
GC	Nontoxin	Nontoxin	474.28	250.99	263.42	462.21	556.04	439.93	975.28	674.65	512.1	233.617	0.456193	FALSE	1107	0.259722	0	3	3	3	0	3	3	6	-0.47299	-0.654434	-0.14674	0.178225	-0.111111	-0.314285	0.0990386	0.390476	0.276051	0.0666667	0.170635	0.157798
GCR2Suppressor	Nontoxin	Nontoxin	23.12	37.68	46.07	29.36	25.42	26.71	33.74	29.58	31.46	7.50127	0.238438	FALSE	1914	0.125	0	1	3	3	0	3	1	4	-1.83088	-1.69654	-1.16221	0.031992	0	0.0857145	-0.0202429	0.6	-0.0961538	-0.0444443	0	0.0174334
GDPFucoseTrans1	Nontoxin	Nontoxin	51.86	42.82	34.49	49.73	38.37	55.82	43.47	40.39	44.6188	7.25165	0.162525	FALSE	1140	0.242979	0	5	4	4	0	4	5	9	-0.366268	-1.15395	0.251382	0.197791	-0.428571		0.288889	-0.132467	0.297707	0.296296	0.175992	0.267025
GDPman46Deh	Nontoxin	Nontoxin	148.78	241.58	265.77	280.4	118.99	95.76	348.18	162.27	207.716	89.0228	0.428579	FALSE	345	0.125	0	3	1	1	0	1	3	4	-1.83088	-1.16221	-1.69654	0.0846235	0	-0.085714	0.0556681	0.6	-0.0961538	0.133333	0	-0.0233199
gemAsc8	Nontoxin	Nontoxin	12.12	19.32	25.78	11.34	10.76	7.58	21.93	21.42	16.2812	6.60847	0.405895	FALSE	645	0.175	0	0	4	4	0	4	0	4	-1.31182	-1.31182		-0.081641	0	0.6	-0.0961538	-1.11429	0.0473179	-0.0444443	-0.05	0.0470191
Gemin6	Nontoxin	Nontoxin	19.76	36.09	24.49	18.52	16.6	24.37	24.53	22.93	23.4113	5.95178	0.254227	FALSE	504	0.179167	0	0	2	2	0	2	0	2	-1.03789	-1.03789		-0.210526	0		-0.0961538	-0.428571	-0.163684	-0.4	-0.0714285	-0.0147735
GenVesTrans-p115	Nontoxin	Nontoxin	55.91	64.89	94.93	42.16	66.3	43.57	83.25	60.48	63.9363	18.1481	0.283847	FALSE	2715	0.363095	0	2	5	5	0	5	2	7	0.721746	0.677634	0.519243	0.410046	-0.25	0.414737	0.598136	-0.0666667	0.551893	0.555555	0.4161	0.288202
GeranylgeranylPyrophosphateSyn	Nontoxin	Nontoxin	8.09	28.35	16.39	17.7	9.97	11.91	17.55	13.63	15.4487	6.28843	0.407051	FALSE	903	0.325	0	2	0	0	0	0	2	2	0.200738		0.200738	0.139887		0.6	0.188248	0.6	0.188248	-0.167832	0.277778	0.269373
GeranylgeranylTrans-2b	Nontoxin	Nontoxin	14.76	21.45	33.5	11.49	18.71	22.07	33.31	20.57	21.9825	7.8941	0.359108	FALSE	996	0.361111	0	1	2	2	0	2	1	3	0.57472	-0.0823774	1.30896	0.301782	0	1	0.780679	-0.619047	0.179769	0.444444	0.277778	0.268653
GerTran1D	Nontoxin	Nontoxin	8.93	20.21	13.08	13.9	7.16	9.04	10.79	6.32	11.1787	4.50592	0.403079	FALSE	1137	0.263736	0	1	0	0	0	0	1	1	-0.264521		-0.264521	-0.21875	0	-0.428571	-0.333333		0	-0.428571	-0.161604	-0.0920526
GH-TMP	Nontoxin	Nontoxin	25.1	83.59	38.64	61.15	54.58	82.51	106.77	44.01	62.0437	27.1973	0.438356	FALSE	1047	0.245833	0	6	0	0	0	0	6	6	-0.630741		-0.630741	-0.0166935	-0.222222	-0.142857	0.117433	-0.428571	0.0467697	-0.2	0.127778	0.149614
GINS	Nontoxin	Nontoxin	7.84	21.9	16.74	24.01	18.92	19.96	32.66	15.12	19.6438	7.19549	0.366299	FALSE	645	0.530303	0	1	0	0	0	0	1	1	1.43099		1.43099						0.75431	0.666667	0.379962	0.8
GliaMaturationFactor-b	Nontoxin	Nontoxin	1.96	21.33	22.47	7.36	12.62	15.32	24.77	21.53	15.92	8.1185	0.509956	FALSE	429	0.125	0	0	1	1	0	1	0	1	-1.16221	-1.16221		0	0			-0.428571	0.131579		0	-0.0640732
GlnSyn	Nontoxin	Nontoxin	48.03	76.14	80.64	126.11	75.48	32.13	429.61	151.01	127.394	128.049	1.00514	FALSE	1122	0.525	0	1	0	0	0	0	1	1	1.4737		1.4737	0.465116	-0.333333	-0.272727	0.742188	-0.272727	0.742188	0.666667	0.515152	0.617092
GlucPIsom	Nontoxin	Nontoxin	92.98	301.4	84.88	157.66	69.32	83.33	107.88	154.93	131.548	76.0649	0.578232	FALSE	1662	0.452778	0	5	1	1	0	1	5	6	1.71976	0.649981	1.77116	0.337951	-0.1	-0.578182	0.305329	0.425455	0.654725	0.265993	0.324749	0.415842
GluRichTetratricopeptide-a	Nontoxin	Nontoxin	12.06	17.94	5.56	15.17	19.59	32.47	22.7	13.91	17.425	7.9833	0.458152	FALSE	942	0.323457	0	7	2	2	0	2	7	9	0.111546	-0.928893	0.502938						0.352427		0.352427	0.352427
GlutamateRec	Nontoxin	Nontoxin	28.49	77.56	14.78	25.5	34.66	39.27	53.66	28.73	37.8312	19.6198	0.518614	FALSE	1026	0.221978	0	7	3	3	0	3	7	10	-1.00862	-1.53785	-0.560232	-0.0869981	-0.514285		0.0777778	-0.302041	0.121582	-0.14303	0.121338	0.0707087
GlutamineSyn	Nontoxin	Nontoxin	25.28	74.62	15.89	79.97	19.68	6.94	28.61	25.25	34.53	27.2761	0.789925	FALSE	1155	0.276416	0	13	0	0	0	0	13	13	-0.352969		-0.352969	0.00436499	-0.242857		-0.182526	0.00408157	0.143928	-0.145666	0.0839867	0.105849
glutamylcyclotransferase-gamma	Nontoxin	Nontoxin	26.4	34.16	34.51	21.08	20.68	20.86	42.19	41.21	30.1363	9.06079	0.300661	FALSE	606	0.27	0	0	5	5	0	5	0	5	-0.342991	-0.342991		0.0161106	1	1	0.0505512		0.0505512	-0.310769	0.0166668	0.13893
Glutaredoxin1	Nontoxin	Nontoxin	222.67	429.25	363.2	291.11	76.21	222.22	417.18	292.67	289.314	116.963	0.404276	FALSE
Glutaredoxin5	Nontoxin	Nontoxin	71.11	67.24	42.08	36.19	69.07	54.84	57.69	43.58	55.225	13.4448	0.243454	FALSE	477	0.179167	0	2	0	0	0	0	2	2	-1.03789		-1.03789	0	0			-0.714286	0.19079		0	-0.0980741
GlutathioneSTransferase1-1	Nontoxin	Nontoxin	12.37	62.47	43.64	34.8	12.55	29.53	8.09	22.48	28.2413	18.4808	0.654391	FALSE	471	0.316667	0	2	0	0	0	0	2	2	0.129959		0.129959	-0.0897175			0.0842105		0.0842105	-0.5	0.166666	0.411668
GlutCoADeh	Nontoxin	Nontoxin	36.24	36	52.34	17.46	43.19	45.58	54.01	29.16	39.2475	12.195	0.310721	FALSE	1329	0.191667	0	1	2	2	0	2	1	3	-1.05524	-1.49796	0.155746	0.014688			0.0874125		0.0874125	-0.133333	0.111111	0.256436
Gly-tRNALig	Nontoxin	Nontoxin	75.9	132.64	62.41	68.31	80.39	44.32	85.97	113.15	82.8862	28.221	0.340479	FALSE	2058	0.24902	0	15	2	2	0	2	15	17	-0.688847	-1.03789	-0.559362	0.164012	0	0.212727	0.204136	-0.657143	0.157056	0.208679	0.0627451	0.139168
GlycineNMethyltransferase	Nontoxin	Nontoxin	25.82	49.29	22.81	53.56	33.13	46.46	37.23	22.12	36.3025	12.3847	0.341154	FALSE	885	0.272727	0	2	1	1	0	1	2	3	-0.333785	-0.912045	0.145688					0.0857145	-0.157967	0.037607	-0.187122	-6.70761e-17
GlycNAcet3BGal1	Nontoxin	Nontoxin	19.4	17.66	46.38	7.79	25.96	8.14	45.38	49.13	27.48	17.2051	0.626095	TRUE	1104	0.125	0	0	1	1	0	1	0	1	-1.16221	-1.16221		-0.210526			-0.0961538		-0.0961538	-0.4	0	0.0989399
Glycogenin1	Nontoxin	Nontoxin	22.07	69.98	38.63	27.37	33.11	45.45	58.1	59.34	44.2563	16.9688	0.383421	FALSE	1014	0.205	0	4	1	1	0	1	4	5	-1.05378	-1.16221	-0.792762	0.151631	0.166667	-0.0642855	0.103693	0.6	0.0381301	0.233333	-0.0266667	0.043444
GlycogenPhosphorylase	Nontoxin	Nontoxin	28.54	41.35	43.1	33.57	33.7	34.57	46.44	35.39	37.0825	5.95117	0.160485	FALSE	2580	0.290741	0	8	1	1	0	1	8	9	-0.129484	-0.448318	-0.0412586	0.282299	-0.0444443	0.374928	0.303517	0.369023	0.240849	0.143939	0.217292	0.227821
GlycolipidTransfer	Nontoxin	Nontoxin	15.36	14.98	9.75	26.35	4.95	7.78	10.53	11.31	12.6263	6.52649	0.516898	FALSE	633	0.406593	0	5	1	1	0	1	5	6	1.15121	1.45689	0.846498	0.387015	-0.067669		0.577778	-0.366233	0.477284	0.613334	0.161961	0.407857
Glycosyltransferase8-1	Nontoxin	Nontoxin	12.19	14.87	24.42	12.23	15.07	7.75	8.1	17.44	14.0087	5.37976	0.384029	FALSE	1101	0.201667	0	3	2	2	0	2	3	5	-1.09023	-0.330104	-1.34917	0.224156	0	0.52381	0.0279214	1	-0.0066312	0.161111	0.0833334	-0.0356087
GlycPhosDeh	Nontoxin	Nontoxin	53.89	167.31	69.46	55.19	83.35	63.02	101.37	63.51	82.1375	37.8399	0.460689	FALSE	1050	0.191667	0	4	2	2	0	2	4	6	-1.24597	-1.49796	-0.792762	0.0866577	-0.166667	0.3	-0.0818246	-0.0571427	-0.177586	0.194872	-0.0277778	-0.0590495
Glyoxalase4	Nontoxin	Nontoxin	23.76	26.9	33.35	25.9	22.03	35.78	39.36	28.32	29.425	6.10967	0.207635	FALSE	897	0.241667	0	5	7	7	0	7	5	12	-0.75672	-1.4218	0.2949	0.0874482	0.128571	0.0100187	0.102179	0.0199318	0.0399957	-0.0121211	0.0341881	0.0385628
GlyoxylateRed	Nontoxin	Nontoxin	17.9	17.57	22.94	12.3	33.76	25.38	64.16	22.64	27.0812	16.2676	0.600698	FALSE	993	0.302983	1	2	4	4	1	5	2	7	-0.0148302	-0.0818836	0.121292	0.312603	0.285714		0.216667	0.474286	0.44893	0.106667	0.275649	0.246885
GnbB2	Nontoxin	Nontoxin	550.59	906.98	509.22	894.27	408.13	590	939.23	1265.36	757.972	289.474	0.381906	FALSE	954	0.281667	0	5	0	0	0	0	5	5	-0.215413		-0.215413	0.0273015	0.0333334	0.154286	0.057914	-1.34286	-0.00446433	0.111111	-0.091111	-0.0158729
GNBP-a	Nontoxin	Nontoxin	29.33	48.01	57.99	45.42	33.51	38.2	65.45	53.78	46.4612	12.4211	0.267344	FALSE	1065	0.236111	0	2	1	1	0	1	2	3	-0.627713	-1.16221	-0.0823774	-0.0108844	0	-0.214285	0.133883	-0.350649	-0.0498175	1.11022e-16	-0.015873	-0.026762
GNBP3	Nontoxin	Nontoxin	34.13	36.12	88.27	30.56	33.27	42.61	56.15	33.65	44.345	19.5333	0.440484	FALSE	1629	0.269444	0	6	3	3	0	3	6	9	-0.389019	0.387675	-0.772718	-0.0934977	-0.333333	-0.714286	-0.0513038	0.0112783	-0.0104899	-0.150617	-0.00674756	0.0833081
Golgi-SNAP	Nontoxin	Nontoxin	46.93	55.67	68.72	17.57	42.48	37.19	76.09	49.13	49.2225	18.2873	0.371523	FALSE	639	0.125	0	1	0	0	0	0	1	1	-1.16221		-1.16221	-0.210526			-0.0961538		-0.0961538	-0.4	0	0.0989399
GolgiERTraffic4	Nontoxin	Nontoxin	20.6	47.29	27.67	31.49	27.31	41.29	40.89	26.92	32.9325	9.17244	0.278522	FALSE	984	0.300366	0	3	0	0	0	0	3	3	-0.0371303		-0.0371303	0.445453	0.0857145		0.555556	0.473684	0.457301	8.88178e-17	0.335921	0.244116
Golgin45	Nontoxin	Nontoxin	20.94	23.79	28.81	18.33	16.67	22.2	33.71	26.83	23.91	5.65546	0.236531	FALSE	1197	0.280952	0	3	4	4	0	4	3	7	-0.238672	-0.0358036	-0.413947	0.521284	0.54	0.487218	0.61612	0.0857145	0.151997	0.333334	0.202381	0.102411
GolginA5-1	Nontoxin	Nontoxin	22.56	25.19	32.74	22.29	22.6	26.54	26.19	26.15	25.5325	3.41934	0.133921	FALSE	2205	0.210417	0	8	8	8	0	8	8	16	-1.18992	-1.10046	-1.07554	0.0669101	-0.166666	0.0632037	-0.0195337	0.0935067	0.0190097	0.0714287	0.0110577	0.0734129
GolgipHReg	Nontoxin	Nontoxin	39.87	35	37.93	31.81	26.21	31.57	43.54	38.02	35.4937	5.49816	0.154905	FALSE	1368	0.152083	0	4	0	0	0	0	4	4	-1.54972		-1.54972	-0.105263	0		-0.0961538	-0.428571	-0.0160524	-0.4	-0.0357143	-0.0394234
GolgiPP3	Nontoxin	Nontoxin	35.2	48.27	27.45	34.51	44.85	39.73	40.3	13.45	35.47	10.9772	0.309479	FALSE	858	0.236364	0	6	5	5	0	5	6	11	-0.814898	-0.616373	-0.820043	0.106213	0.0555556	0.44	0.340241	-0.358646	0.0497039	-0.333333	0.0991343	0.0599435
GolgiStacking2	Nontoxin	Nontoxin	103.75	189.27	182.01	126.96	174.08	154.01	259.85	115.22	163.144	50.3235	0.308461	FALSE	1383	0.262121	0	6	5	5	0	5	6	11	-0.491988	-1.09023	0.126466	0.0718773	-0.1	-0.565714	0.14538	-0.27619	0.100163	0.0305556	0.047148	0.133531
GolgPhos3	Nontoxin	Nontoxin	27.96	31.7	19.74	32.55	21.67	25.18	32.72	22	26.69	5.28059	0.197849	FALSE	909	0.5	0	1	0	0	0	0	1	1	0.649981		0.649981
GOT1B	Nontoxin	Nontoxin	23.97	43.08	34.92	25.73	42.04	32.88	35.82	11.6	31.255	10.4401	0.334031	FALSE	417	0.225	0	1	1	1	0	1	1	2	-0.648609	-1.16221	0.155746	-0.148368	-0.166666	-0.428571	-0.231214	-0.428571	-0.0498175	-0.4	-0.0333333	-0.0987236
GPatch-Ankyrin1	Nontoxin	Nontoxin	10.39	34.48	10.72	24.09	7.49	14.89	19.16	22.52	17.9675	8.95615	0.498464	FALSE	1050	0.256667	0	3	2	2	0	2	3	5	-0.488794	-1.03789	0.067026	0.101581	0.25	0.6	0.104003	0.3	0.199829	-0.666667	0.2	0.103911
GPNLoop3	Nontoxin	Nontoxin	34.61	47	47.31	34.2	25.71	42.12	50.19	45.97	40.8888	8.51037	0.208135	FALSE	855	0.356667	0	3	2	2	0	2	3	5	0.604732	1.26242	-0.0665776	-0.100413	-0.0833332	0.057143	0.0272179	-0.350649	-0.0373191	-0.382222	0.0458926	0.0798276
GPNTDTransferase1	Nontoxin	Nontoxin	33.3	44.41	38.17	17.19	20.07	18.46	33.37	40.73	30.7125	10.7144	0.348861	FALSE	1467	0.208333	0	3	1	1	0	1	3	4	-0.965781	-1.16221	-0.627713	0.0844333		0.6	0.0587045	0.6	0.0587045	-0.311111	0.133333	0.135924
GProtein-g5	Nontoxin	Nontoxin	86.56	163.09	79.65	128.41	87.5	201.8	156.13	100.17	125.414	44.538	0.355129	FALSE
GProtSupp2	Nontoxin	Nontoxin	9.08	19.27	5.14	14.61	16.02	20.79	24.29	15.46	15.5825	6.19927	0.397835	FALSE	1047	0.262222	0	10	0	0	0	0	10	10	0.681103		0.681103						0.346992		0.346992	0.346992
Grainyhead1	Nontoxin	Nontoxin	87.07	64.86	126.07	94.45	54.78	71.61	118.71	92.51	88.7575	24.9523	0.281128	FALSE	1917	0.125	0	1	0	0	0	0	1	1	-1.16221		-1.16221	-0.210526			-0.0961538		-0.0961538	-0.4	0	0.0989399
Grancalcin	Nontoxin	Nontoxin	65.99	126.95	132.41	112.51	112.45	109.51	185.48	113.56	119.858	33.1048	0.276201	FALSE	660	0.125	0	0	1	1	0	1	0	1	-1.16221	-1.16221		0	0	-0.428571	0.131579				0	-0.0640732
GRichSeq1	Nontoxin	Nontoxin	82.38	170.31	126.35	114.84	138.24	150.25	194.16	113.5	136.254	35.233	0.258584	FALSE	1383	0.191666	0	6	2	2	0	2	6	8	0.408759		0.408759						-0.314285		-0.314285	-0.314285
GrowthArrestDNADamage-GADD45	Nontoxin	Nontoxin	11.46	42.19	25.7	24.57	11.59	17.09	25.71	15.52	21.7288	10.1887	0.468903	FALSE	480	0.175	0	4	0	0	0	0	4	4	-1.31182		-1.31182	0.148271		0.6	0.0874125	0.6	0.0874125	0.0666667	0.0833332	0.176309
GrowthDiffFactor5	Nontoxin	Nontoxin	36.46	46.27	51.96	21.14	59.48	41.06	99.76	43.04	49.8963	23.0781	0.462522	FALSE	1494	0.305555	0	5	4	4	0	4	5	9	0.0510627	-0.122313	0.185547	0.15168	0.0714286	0.52653	0.013547	-0.0239233	0.177762	0.145869	0.0210249	0.100928
GrowthFactorRec2-1	Nontoxin	Nontoxin	16.44	30.34	15.09	14.73	7.28	22.33	20.15	12.98	17.4175	6.91423	0.39697	FALSE	654	0.197222	0	2	1	1	0	1	2	3	-1.0018	-1.16221	-0.57783	0.264431		0.6	0.172414	0.6	0.172414	0.222222	0.111111	0.210526
GRP78	Nontoxin	Nontoxin	1400.4	2286.09	793.11	777.74	2474.58	2374.02	2451.83	732.68	1661.31	814.996	0.490575	FALSE	1962	0.277778	0	18	3	3	0	3	18	21	-0.316076	-0.814758	-0.177294	0.111566	0.12963	0.307937	0.109014	-0.00510773	0.126133	-0.154148	0.1112	0.148848
GSK3-b	Nontoxin	Nontoxin	16.64	33.55	23.86	14.33	23.91	20.9	29.01	21.64	22.98	6.22053	0.270693	FALSE	414	0.125	0	1	1	1	0	1	1	2	-1.49796	-1.16221	-1.16221	-0.105263	0	-0.428571	0.0177126		-0.0961538	-0.4	0	0.0174334
GST-3	Nontoxin	Nontoxin	83.3	124.93	120.12	63.66	52.63	64.19	114.84	112.72	92.0487	29.346	0.31881	FALSE
GST-mu	Nontoxin	Nontoxin	445.74	294.54	747.32	278.91	156.72	319.61	231.12	147.45	327.676	194.427	0.59335	FALSE	663	0.285714	0	4	3	3	0	3	4	7	-0.182996	-1.34917	0.807664	-0.0479585	0	-0.514285	-0.0602206	0.257143	0.116091	-0.389277	0.0647392	0.0823588
GST-Mu1-1	Nontoxin	Nontoxin	61.85	37.6	94.36	26.35	9.51	50.77	22.85	5.95	38.655	29.5422	0.764254	TRUE	723	0.225	0	1	1	1	0	1	1	2	-0.648609	0.155746	-1.16221	-0.336477	0		-0.148077	-0.428571	-0.304773	-0.7	-0.1	0.0151135
GST-P	Nontoxin	Nontoxin	58.49	102.43	133.72	43.52	43.14	53.7	128.9	68.08	78.9975	37.3363	0.472627	FALSE	636	0.233333	0	3	3	3	0	3	3	6	-0.772718	-1.69654	0.387675	-0.087947	-0.25	0	0.126203	-1.07619	0.00635828	-0.266667	0.0694445	0.063841
GST-t1	Nontoxin	Nontoxin	1062.85	1534.94	970.25	1553.32	615.45	656.05	1851.24	2204.74	1306.11	571.932	0.437891	FALSE	780	0.208333	0	4	1	1	0	1	4	5	-1.01733	-0.448318	-1.03066	0.242233	-0.5	0.0666667	0.198276	0.257143	0.158802	0.333334	0.111111	0.124355
Gtf2a1	Nontoxin	Nontoxin	16.3	16.26	15.68	6.39	10.65	9.87	17.73	16.2	13.635	4.09003	0.299966	FALSE	1209	0.197222	0	5	1	1	0	1	5	6	-1.18287	-1.16221	-0.980881	0.00799017	0	0.0666667	0.0267905	0.163636	0.00310632	-0.0266666	0.0317462	0.056848
GTPBind10	Nontoxin	Nontoxin	10.3	27.16	32.04	10.47	9.24	12.97	20.6	20.35	17.8912	8.54605	0.477666	FALSE	1107	0.5125	0	1	1	1	0	1	1	2	1.79326	1.30896	1.4737	0.774656		0.6	0.877155	0.6	0.877155	0.333334	0.789682	0.765619
GTPBinding-RhoE	Nontoxin	Nontoxin	9.59	14.79	18.24	14.85	10.55	18.47	18.84	20.36	15.7112	3.98397	0.253574	FALSE	735	0.125	0	1	0	0	0	0	1	1	-1.16221		-1.16221	0	0	-0.428571	0.131579				0	-0.0640732
GTPBindingSAR1a	Nontoxin	Nontoxin	86.42	106.09	126.35	74.98	74.59	102.52	111.06	37.18	89.8987	27.8933	0.310274	FALSE	597	0.294444	0	2	1	1	0	1	2	3	-0.0665776	-1.16221	0.660801	0.001316	0	-0.350649	0.0230777	0.6	0.187334	-0.266667	0.124098	0.160749
GTPCyclohydrolase-1	Nontoxin	Nontoxin	3.92	2.41	0	0	4.83	10.83	25.51	50.61	12.2637	17.6098	1.43592	FALSE	255	0.18315	0	1	2	2	0	2	1	3	-1.15395	-0.84939	-1.0535	0.175956	0.285714	-0.428571	0.0177126		0.3	-0.4	0.0411452	-0.0261948
GTPnpRAN1	Nontoxin	Nontoxin	96.54	172.35	148.26	139.76	84.78	157.87	171.74	143.72	139.377	32.4925	0.233126	FALSE	654	0.429167	0	2	0	0	0	0	2	2	1.08547		1.08547	-0.0383305	-0.5	0.163636	0.165072	-0.6	-0.07539	-0.181818	0.156863	0.0273923
GuanineBinding-a1	Nontoxin	Nontoxin	25.32	58.77	33.82	28.86	35.87	34.47	31.34	31.02	34.9337	10.1984	0.291934	FALSE	1140	0.125	0	1	1	1	0	1	1	2	-1.49796	-1.16221	-1.16221	0.27451	0	0.6		0.0857145	0.131579	0.666667	0	-0.0640732
GuanineBinding3	Nontoxin	Nontoxin	27.59	33.55	32.19	17.41	29.06	32.74	36.75	30.19	29.935	5.80235	0.193832	FALSE	1668	0.335897	0	8	5	5	0	5	8	13	0.441904	0.641183	0.232889	0.328509	-0.261905	-0.187532	0.400058	0.162338	0.520056	0.406667	0.267271	0.322751
GuanineNucBinding-b1	Nontoxin	Nontoxin	9.93	25.31	10.31	12.24	7.53	15.81	17.69	10.83	13.7062	5.72347	0.417581	FALSE	1023	0.246667	0	5	0	0	0	0	5	5	-0.598147		-0.598147	0.272651	0	0.8	0.3709	0.215038	0.221643	0.0666667	0.202667	0.16993
GuanMonRed	Nontoxin	Nontoxin	20.1	71.32	33.11	37.91	29.57	54.05	63.65	28.85	42.32	18.4219	0.4353	FALSE	1038	0.191667	0	7	2	2	0	2	7	9	-1.33689	-1.49796	-1.0599	0.0491414	0.0277778	0.3	0.0181767	-0.231168	-0.0292851	0.0222223	-0.0255731	-0.0081127
Guk1	Nontoxin	Nontoxin	45.99	40.14	32.22	17.82	21.96	18.2	49.3	37.53	32.895	12.4086	0.377217	FALSE	597	0.323333	0	3	2	2	0	2	3	5	0.240223	-0.57783	0.788486	0.270772	0	0.348371	0.35365	0.333333	0.447709	-0.5	0.338095	0.172664
H-ACARibonucleoprotein3	Nontoxin	Nontoxin	56.25	29.06	75.07	44.23	66.21	40.99	103.3	85.64	62.5938	24.8584	0.397138	FALSE
HACoADH2	Nontoxin	Nontoxin	77.24	109.84	140.79	94.83	74.35	120.14	113.05	126.78	107.127	23.4521	0.218917	FALSE	786	0.225	0	2	0	0	0	0	2	2	-0.648609		-0.648609	0.092643	0	0.0857145	0.151997	0.6	0.172414	-0.181818	0.166666	0.0009151
HAGH	Nontoxin	Nontoxin	29.2	61.6	27.89	49.74	23.07	40.79	41.78	45.1	39.8963	12.7675	0.320017	FALSE	924	0.222222	0	6	0	0	0	0	6	6	-0.898919		-0.898919	0.0175515	0	0.6	-0.0290118	-0.245714	-0.108281	-0.0266666	-0.0425925	-0.103379
HBDH	Nontoxin	Nontoxin	39.84	42.81	25.35	90.78	84.34	92.38	85.73	67.91	66.1425	26.4942	0.400563	FALSE	1050	0.351648	0	5	0	0	0	0	5	5	0.513233		0.513233	0.292887	-0.664285		0.444445	-0.131579	0.248226	0.75	-0.0680003	0.288246
HCLS1-X1	Nontoxin	Nontoxin	40.74	66.23	17.44	82.61	30.29	62.57	69.31	58.78	53.4963	21.946	0.410234	FALSE	810	0.182843	0	7	10	10	0	10	7	17	-1.5597	-1.09976	-1.88113	-0.0875845	-0.1	-0.611428	0.00329794	0.0857145	-0.00906045	-0.257988	0.0424836	0.08756
HCoADH	Nontoxin	Nontoxin	50.8	56.55	62.1	57.67	30.89	43.47	66.56	83.59	56.4537	15.7023	0.278144	FALSE	930	0.179167	0	1	1	1	0	1	1	2	-1.03789	-1.16221	-0.448318	0.0610685	0	0.0857145	0.0177126	0.6	-0.0961538	1.11022e-16	0.0833335	-0.0962801
HD2	Nontoxin	Nontoxin	60.87	223.7	159.93	130.02	103.49	215.59	168.63	100.38	145.326	57.2879	0.394202	FALSE	576	0.419444	0	2	1	1	0	1	2	3	1.13586	-0.448318	1.79326	0.00159558	-0.5	-1	-0.102753	0.0225565	0.242248	0.0148147	0.0994153	0.14965
HemaNeuro1	Nontoxin	Nontoxin	56.8	106.52	81.35	86.05	50.47	54.88	90.54	92.07	77.335	20.6431	0.266931	FALSE	456	0.286111	0	2	1	1	0	1	2	3	-0.14674	-1.16221	0.554633	0.250289	0	0.6	0.75431	-0.376623	0.21992	0.666667	0.0517963	0.221099
HemeBinding1	Nontoxin	Nontoxin	8.89	20.92	23.65	22.99	23.06	22.73	19.39	15.74	19.6713	5.08517	0.258508	FALSE	570	0.125	0	1	1	1	0	1	1	2	-1.49796	-1.16221	-1.16221	0	0	-0.428571	0.131579				0	-0.0640732
Hemoglobin-a	Nontoxin	Nontoxin	514.74	781.2	124.01	9.2	46.27	118.19	768.73	9.89	296.529	336.879	1.13608	FALSE	429	0.125	0	0	2	2	0	2	0	2	-1.49796	-1.49796		-0.105263	0	-0.428571	0.0177126		-0.0961538	-0.4	0	0.0174334
Hemoglobin-b1	Nontoxin	Nontoxin	235.89	81.36	1.57	9.27	32.35	124.87	667.86	7.14	145.039	225.765	1.55658	FALSE	444	0.344322	0	3	0	0	0	0	3	3	0.381676		0.381676	-0.0701168	0.0225565		-0.153846	-0.428571	0.038627	-0.153846	-0.0143118	0.0403167
Hemoglobin-rho	Nontoxin	Nontoxin	451.4	1072.55	110.1	37.09	101.03	340.81	1276.77	26.93	427.085	487.799	1.14216	FALSE	444	0.354166	0	4	2	2	0	2	4	6	0.59972	0.129959	0.742782	0.0517322	-0.133333	-0.305263	0.290477	-0.24812	0.0394662	-0.4	0.191732	0.0226223
HepaticLeukemiaFactor	Nontoxin	Nontoxin	7.37	18.89	12.05	8.45	5.87	4.53	11.84	10.9	9.9875	4.53126	0.453693	FALSE	882	0.458333	0	1	0	0	0	0	1	1	1.03439		1.03439	0.465116	0.5	0.428571	0.136187	1	-0.0961538	0.666667	-0.142857	-0.0497858
Hepatocyte	Nontoxin	Nontoxin	15.28	38.52	23.65	35.42	20.88	33.24	41.11	32.62	30.09	9.12509	0.30326	FALSE	2298	0.248214	0	12	2	2	0	2	12	14	-0.685857	-1.49796	-0.413422	-0.013083	-0.148148	-0.0391659	-0.041982	-0.0297742	-0.0863502	-0.0166666	-0.0260771	-0.00517315
HepatomaGF-3	Nontoxin	Nontoxin	18	38.77	22.37	9.68	13.19	26.16	32.09	13.55	21.7263	10.1185	0.465726	FALSE	612	0.233333	0	2	0	0	0	0	2	2	-0.57783		-0.57783	0.612359	0	0.8		0.363636	0.131579	0.833333	-0.0714285	-0.0380655
HepBX	Nontoxin	Nontoxin	60.46	40.87	73.9	51.33	26.48	61.67	95.3	42.14	56.5187	21.4777	0.38001	FALSE	276	0.125	0	1	1	1	0	1	1	2	-1.49796	-1.16221	-1.16221	-0.210526			-0.0961538		-0.0961538	-0.4	0	0.0989399
HetNucRnpG	Nontoxin	Nontoxin	13.76	31	11.32	21.52	10.01	23.72	16	11.64	17.3712	7.38566	0.425166	FALSE	1155	0.295833	0	4	0	0	0	0	4	4	-0.057431		-0.057431	0.274769	0	0.6	0.302062	0.309091	0.167519	0.0757577	0.217105	0.163162
hexokinase1	Nontoxin	Nontoxin	16.98	43.6	27.68	28.68	22.67	28.49	47.18	18.69	29.2463	10.9292	0.373697	FALSE	2754	0.320833	0	4	0	0	0	0	4	4	0.202097		0.202097	0.35625	0	0.285714	0.407895	1	0.684211	-1	0.416667	0.176094
HexosaminidaseD-1	Nontoxin	Nontoxin	32.6	29.59	73.27	23.87	28.24	25.65	40.07	43.62	37.1137	16.1284	0.434568	FALSE	1422	0.177083	0	8	0	0	0	0	8	8	-1.48676		-1.48676	-0.0220972	0	-0.542857	0.0771888		0.0381301	-0.2	0.0166668	0.031937
Hippocampus1	Nontoxin	Nontoxin	20.33	29.27	22.42	20.19	23.07	22.52	37.05	27.24	25.2613	5.72443	0.226609	FALSE	1470	0.277778	0	5	1	1	0	1	5	6	-0.267913	-1.16221	0.0761943	-0.0453062	-0.1	0.0428572	-0.00586016	-0.567099	-0.0629802	-0.0273505	-0.0256614	0.0119528
HistDeacet3	Nontoxin	Nontoxin	26.38	29.89	53.74	39.22	37.11	34.19	42.32	16.53	34.9225	11.1432	0.319084	FALSE	1287	0.316667	0	2	0	0	0	0	2	2	0.129959		0.129959	0.190101		0.6	0.136134	0.6	0.136134	5.5511e-17	0.25	0.252829
HistidineNBP1	Nontoxin	Nontoxin	92.98	114.58	146.34	111.58	58.55	90.3	87.98	139.06	105.171	28.8141	0.273973	FALSE	381	0.125	0	1	1	1	0	1	1	2	-1.49796	-1.16221	-1.16221	0	0	-0.428571	0.131579				0	-0.0640732
Histidyl-tRNASyn1	Nontoxin	Nontoxin	54.77	66.11	45.24	41.3	29.4	38.41	41.37	50.45	45.8813	11.2013	0.244137	FALSE	1506	0.331944	0	7	5	5	0	5	7	12	0.387606	0.0944197	0.540798	0.252206	-0.047619	0.486617	-0.0314113	0.442953	-0.0139448	0.279772	0.0377099	0.0166001
HistoneAcetyltransferaseB	Nontoxin	Nontoxin	12.66	25.42	23.93	17.36	12.92	16.36	23.31	12.68	18.08	5.3996	0.29865	FALSE	1227	0.31875	0	3	1	1	0	1	3	4	0.18047	-1.16221	0.788486	0.399879	0.125	1	1	0.0112783	0.390226		0.394841	0.221419
HistoneBind	Nontoxin	Nontoxin	51.13	106.76	71.39	81.11	66.13	80.21	98.23	79.94	79.3625	17.511	0.220646	FALSE	1293	0.355556	0	6	0	0	0	0	6	6	0.615496		0.615496	-0.0271438	0	0.0997404	0.0714122	-0.368182	-0.00968763	-0.119192	0.0334554	0.0711358
HistoneDeacetylase2	Nontoxin	Nontoxin	20.63	32.17	29.58	18.89	20.33	17.59	24.47	27.54	23.9	5.37964	0.22509	FALSE	1467	0.270833	0	5	1	1	0	1	5	6	-0.346789	-1.16221	-0.014933	-0.145512	-0.333333	-0.619047	-0.112027	-0.345865	0.0284649	-0.2	0.037037	-0.00428505
HistoneH2A-2	Nontoxin	Nontoxin	7.5	42.05	23.5	20.33	10.4	18.62	18.71	13.19	19.2875	10.6426	0.551787	FALSE
HistoneH2AZ	Nontoxin	Nontoxin	45.99	28.32	31.83	27.12	31.37	36.52	42.78	33.44	34.6713	6.70959	0.19352	FALSE
HistoneH3-2	Nontoxin	Nontoxin	7.72	0	0	8.57	1.51	6.27	15.6	20.66	7.54125	7.46294	0.989616	TRUE	411	0.333333	0	1	0	0	0	0	1	1	-0.0334055		-0.0334055						0.6		0.6	0.6
HistoneH3-3-1	Nontoxin	Nontoxin	179.69	319.34	285.49	385.13	237.77	415.32	356.96	282.98	307.835	77.9382	0.253182	FALSE	411	0.301667	0	5	0	0	0	0	5	5	0.00329248		0.00329248	-0.0028453	-0.0833332	-0.0935062	0.0061946	0.018182	-0.0251515	7.77155e-17	0.0233334	0.00886172
HistoneH3-3-2	Nontoxin	Nontoxin	99.67	90.03	145.88	156.95	61.34	77.58	147.74	252.3	128.936	61.2034	0.474679	FALSE
HistoneH3-3-3	Nontoxin	Nontoxin	85.64	147.78	163.78	130.57	46.19	79.93	144.07	192.2	123.77	48.8625	0.394784	FALSE	411	0.5	0	1	0	0	0	0	1	1	1.30896		1.30896	-0.00700525	-0.5	0.473684	0.396601	-1	-0.15748	-0.4	0.298246	0.0142096
HMG-14	Nontoxin	Nontoxin	73.16	194.63	155.63	143.49	98.34	104.84	128.33	228.04	140.808	51.4952	0.365714	FALSE	297	0.125	0	0	1	1	0	1	0	1	-1.16221	-1.16221		-0.210526			-0.0961538		-0.0961538	-0.4	0	0.0989399
HMG-14A	Nontoxin	Nontoxin	90.21	127.8	134.73	88.41	93	60.95	162.4	253.51	126.376	60.5646	0.479241	FALSE	318	0.272222	0	2	1	1	0	1	2	3	-0.280343	-1.16221	0.377685	0.0682913	-0.166666	0.0225565	0.0556681	0	0.196994	0.3	0.00793667	0.174043
HMG-17	Nontoxin	Nontoxin	86.71	356.37	230.22	173.92	203.22	228.22	136.33	228.88	205.484	79.5826	0.387294	FALSE	273	0.5	0	1	0	0	0	0	1	1	1.30896		1.30896	0.643963		1	0.561358	1	0.561358	8.88178e-17	0.722222	0.227694
HMGBox1	Nontoxin	Nontoxin	12.05	31.8	19.18	25.4	22.37	28.59	39.09	27.4	25.735	8.1744	0.317638	FALSE	1533	0.258333	0	10	6	6	0	6	10	16	-0.563007	-0.567641	-0.480981	0.106953	-0.0888889	0.181582	0.192421	-0.500144	-0.0156247	0.179772	0.0175926	0.0718251
HMGCoASyn	Nontoxin	Nontoxin	4.13	11.81	12.59	11.21	2.1	20.7	35.94	7.57	13.2563	10.8019	0.814854	FALSE	1566	0.220833	0	2	2	2	0	2	2	4	-0.836016	0.129959	-1.49796	0.417789	0.5	0.390476	0.434664	0.6	0.172414	0.333334	0.125	0.0843316
HPFB1	Nontoxin	Nontoxin	114.73	285.05	117.05	141.27	155.82	230.46	119.83	150.12	164.291	61.445	0.374	FALSE	243	0.316667	0	2	0	0	0	0	2	2	0.129959		0.129959	-0.0995445	0	-0.272727	-0.0342105	0	0.177778	-0.166666	0.0384615	0.249558
HRP12	Nontoxin	Nontoxin	16.72	13.75	19.6	7.54	12.22	11.2	12.24	9.53	12.85	3.8556	0.300046	FALSE	423	0.3125	0	2	0	0	0	0	2	2	0.0945699		0.0945699	0.121317	0	0	0.133883	0.473684	0.396601	-0.4	0.18421	0.0174334
HSG3OST1	Nontoxin	Nontoxin	55.25	88.26	56.97	51	79.5	61.45	133.64	41.18	70.9062	29.5664	0.416978	FALSE	927	0.386111	0	2	1	1	0	1	2	3	0.815206	1.4737	0.129959	0.312283	0.5	0.6	0.43171	0	0.232059	0.087542	0.256173	0.405876
HSP-b8	Nontoxin	Nontoxin	14.36	66.03	12.95	6.01	4.34	11	17.31	15.7	18.4625	19.745	1.06946	FALSE	618	0.388889	0	3	0	0	0	0	3	3	0.841927		0.841927	0.361355	0	0.6	0.513612	-0.272727	0.427674	0.222222	0.393333	0.571194
HSP10	Nontoxin	Nontoxin	288.11	193.91	298.08	128.66	59.61	156.71	288.59	372.65	223.29	105.16	0.470955	FALSE
HSP60	Nontoxin	Nontoxin	108.7	85.08	110.31	67.12	54.31	68.47	111.44	73.6	84.8788	22.5706	0.265916	FALSE	1722	0.125	0	3	0	0	0	0	3	3	-1.69654		-1.69654	0	0	-0.428571	0.131579	-0.428571	0.131579		0	-0.0640732
HSP70	Nontoxin	Nontoxin	96	184.48	97.63	133.69	90.75	152.5	134.27	161.09	131.301	34.2336	0.260726	FALSE	1908	0.208333	0	5	0	0	0	0	5	5	-1.01733		-1.01733	0.0572064	-0.333333	0.0857145	0.00436505	0.0857145	0.00436505	-0.0266666	0.0533335	0.119429
HSP70-13	Nontoxin	Nontoxin	80.04	115.88	244.41	64.27	190.13	174.42	245.25	132.86	155.908	69.2979	0.444481	FALSE	1410	0.333333	0	5	1	1	0	1	5	6	0.363093	0.649981	0.203772	0.158955	0	-0.428571	0.113381	0.428571	0.237722	0.2	0.0978634	0.281773
HSP70-4	Nontoxin	Nontoxin	25.81	51.45	35.18	31.26	30.92	29.95	34.03	29.14	33.4675	7.81683	0.233565	FALSE	2526	0.179762	0	3	4	4	0	4	3	7	-1.4218	-1.11717	-1.34917	0.128096	0.166667	-0.135338	0.246412	-0.428571	0.0177126	-0.4	0.0201466	-0.0634567
HSP71-1	Nontoxin	Nontoxin	78.74	85.75	40.15	84.76	34.32	55.21	104.58	40.41	65.49	26.2781	0.401253	FALSE	1947	0.307738	0	12	2	2	0	2	12	14	0.0822301	-0.648609	0.255568	0.120788	0.0878788	-0.000149	0.0779604	-0.214317	0.174737	0.0444447	0.0535714	0.039388
HSP71-2	Nontoxin	Nontoxin	172.05	185.87	310.73	224.36	219.27	240.48	331.62	72.3	219.585	81.423	0.370804	FALSE	1953	0.298485	0	11	0	0	0	0	11	11	-0.0361143		-0.0361143	0.300818	0.172222	0.258692	0.0887141	0.158766	0.221408	0.333075	0.0374577	0.0906223
HSP90-Cdc37	Nontoxin	Nontoxin	58.15	83.43	104.99	78.1	48.67	55.37	85.41	106.32	77.555	21.973	0.283322	FALSE	1134	0.327778	0	2	1	1	0	1	2	3	0.254071	1.03439	-0.330104	0.146088	0.2	0.536842	0.338152	0.0857145	0.134615	-0.755555	0.316667	0.241068
HSP90a	Nontoxin	Nontoxin	374.65	260.5	306.61	148.09	164.19	162.07	296.25	282.32	249.335	82.387	0.330427	FALSE	2187	0.188095	0	7	0	0	0	0	7	7	-1.32436		-1.32436	-0.107376	-0.0833333	-0.38961	-0.0590848	-0.885714	-0.0173259	-0.266667	-0.0408163	-0.0479465
HSP90b	Nontoxin	Nontoxin	116.47	423.2	190.32	274.27	102.56	151.02	298.67	524.05	260.07	151.269	0.581647	FALSE	2196	0.180556	0	6	0	0	0	0	6	6	-1.37217		-1.37217	0.219414	-0.166667	0.111688	0.010648	-2.77556e-17	-0.15748	0.5	-0.0238095	-0.061692
HSPC171	Nontoxin	Nontoxin	38.95	34.81	61.73	36.05	67.42	54.32	57.89	40.5	48.9588	12.8229	0.261912	FALSE	522	0.125	0	1	1	1	0	1	1	2	-1.49796	-1.16221	-1.16221	0.27451	0	0.0857145	0.131579	0.6		0.666667	0	-0.0640732
Hunt1	Nontoxin	Nontoxin	18.12	29.03	23.48	25.23	24.09	27.72	32.52	25.14	25.6663	4.26253	0.166075	FALSE	3189	0.234167	0	24	6	6	0	6	24	30	-0.922412	-0.962019	-0.850209	0.0432149	-0.0869564	-0.139432	0.0366018	-0.0562639	0.110114	-0.0362636	0.0520907	0.0280768
HuntingtinK	Nontoxin	Nontoxin	107.64	129.41	110.87	152.52	124.46	361.99	206.99	251.42	180.663	88.9303	0.492246	FALSE	390	0.455556	0	2	0	0	0	0	2	2	1.15484		1.15484						-0.0367425		-0.0367425	-0.0367425
HyalBind4	Nontoxin	Nontoxin	12.48	35.95	38.73	41.82	17.29	30.29	18.59	53.36	31.0637	14.075	0.453099	FALSE	1161	0.140476	0	2	5	5	0	5	2	7	-1.88113	-1.69167	-1.49796	0.0840856	0	0.257143	0.00310632	0.6	-0.0290118	0.0222223	0.0238096	0.0646323
HydroxybutyrateDH-2	Nontoxin	Nontoxin	3.58	14.36	20.41	7.53	6.79	5.01	13.66	19.73	11.3837	6.57538	0.577611	FALSE	738	0.227778	0	1	2	2	0	2	1	3	-0.707875	-0.648609	-0.448318	-0.073179	-0.5	-0.428571	0.0692797	-1	0.108753	-0.2	0.12963	0.167012
HyoxiaUpReg1	Nontoxin	Nontoxin	200.88	183.89	116.57	95.96	87.82	233.35	80.01	107.73	138.276	58.7665	0.424994	FALSE	2979	0.247222	0	7	5	5	0	5	7	12	-0.6863	-0.361216	-0.809356	0.0556704	-0.3	-0.314286	-0.00714286	0.193757	-0.0203875	0.0909093	-0.0247557	0.0874487
HypoxanthineGPT	Nontoxin	Nontoxin	23.13	28.27	19.99	10.98	8.71	15.77	21.07	8.88	17.1	7.1955	0.42079	FALSE	675	0.423333	0	5	0	0	0	0	5	5	1.33375		1.33375	0.262692	-0.116667	0.389474	0.159527	0.0375942	0.022155	0.073077	0.126681	0.0493537
HypPro1-3	Nontoxin	Nontoxin	12.53	18.41	19.25	14.98	11.45	17.78	21.85	16.27	16.565	3.48598	0.210443	FALSE	1806	0.276042	0	16	8	8	0	8	16	24	-0.342714	0.531958	-0.787878	0.0139359	-0.347222	-0.145158	0.0593785	-0.432171	0.0554885	0.0402931	0.039881	0.141598
ICCaKChannel4	Nontoxin	Nontoxin	27.08	27.87	32.57	28.36	18.15	9.74	24.12	18.41	23.2875	7.38424	0.31709	FALSE	1302	0.152083	0	9	3	3	0	3	9	12	-1.89224	-1.69654	-1.70926	0.21051	0.0833333	0.242857	0.0945474	0.32381	-0.0729856	0.257143	0.00198417	-0.0379375
ID-g1	Nontoxin	Nontoxin	25.82	23.08	36.13	28.71	17.88	25.15	38.06	31.82	28.3313	6.77195	0.239027	FALSE	1167	0.175	0	4	0	0	0	0	4	4	-1.31182		-1.31182	-0.0290094	0	-0.428571	0.0927715		0.0539641	-0.276923	0.0555555	0.110909
IER2	Nontoxin	Nontoxin	22.53	2.93	0.39	11.11	39.42	20.13	19.94	11.02	15.9337	12.4608	0.782035	TRUE	726	0.234848	0	0	2	2	0	2	0	2	-0.609287	-0.609287						-0.428571	-0.163684	-0.4	-0.138728	-0.1
ImmatColonCar	Nontoxin	Nontoxin	61.52	73.19	97.53	41.41	50.46	70.66	55.27	38.78	61.1025	19.2649	0.315289	FALSE	591	0.179167	0	0	2	2	0	2	0	2	-1.03789	-1.03789		-0.105263	0		-0.0961538	-1	0.0769231	-0.4	0	-0.0165676
ImmEarlyResp3Int1	Nontoxin	Nontoxin	224.39	54.12	125.26	263.33	261.05	312.24	332.57	133.7	213.332	98.8115	0.463181	FALSE
IMP	Nontoxin	Nontoxin	21.2	33.42	32.25	16.48	22.7	11.22	31.62	33.27	25.27	8.59653	0.340187	FALSE	2136	0.114286	0	2	3	3	0	3	2	5	-1.65962	-1.35784	-1.35784	0.059408	-0.428571	-0.171428	0.131579			0.666667	0.0315365	-0.044586
IMP-2A	Nontoxin	Nontoxin	413.76	893.61	525.76	802.2	455.57	765.39	968.75	690.79	689.479	205.52	0.298081	FALSE	756	0.231667	0	4	1	1	0	1	4	5	-0.762176	-1.16221	-0.446724	0.263998	-0.111111	0.163636	0.442945	-0.132467	0.287262	0.666667	0.0933333	0.168061
IMP-erythrocyteband7	Nontoxin	Nontoxin	7.26	11.76	4.76	33.72	5.16	7.86	6.23	17.88	11.8287	9.84348	0.832166	FALSE	846	0.162637	0	10	0	0	0	0	10	10	-0.832933		-0.832933	0.0412969	-0.156692		0.088889	-0.274805	-0.0192778	-0.044444	-0.03917	-0.0376026
IMPDehydro2	Nontoxin	Nontoxin	31.41	114.25	36.94	52.32	30.57	26.13	51.99	122.81	58.3025	38.4535	0.659552	FALSE	1545	0.277083	0	4	0	0	0	0	4	4	-0.252077		-0.252077	0.400373	0	0.536842	0.346469	0.2	0.416164	0.703704	0.0684525	0.235799
Importin-a1	Nontoxin	Nontoxin	21.19	39.23	32.88	22.18	22.13	26.14	49.1	19.84	29.0862	10.4911	0.360691	FALSE	1617	0.204167	0	8	0	0	0	0	8	8	-1.16277		-1.16277	-0.13003	0	-0.38961	-0.0212297	0.514285	-0.0281196	-0.546667	0.0238095	0.0968534
Importin-a2	Nontoxin	Nontoxin	22.11	36.19	37.96	20.53	35.85	35.82	45.59	12.81	30.8575	11.0477	0.358024	FALSE	1587	0.268333	0	4	1	1	0	1	4	5	-0.361216	-0.448318	-0.252077	-0.0897345	0.125	-0.428571	0.0849358	-0.142857	-0.142275	-0.435897	-0.0336996	0.063069
Importin-a4	Nontoxin	Nontoxin	24.02	37.75	17.5	23.1	24.43	28.87	38.32	28.67	27.8325	7.22487	0.259584	FALSE	1566	0.20625	1	3	0	0	1	1	3	4	-0.987408	-1.16221	-0.654434	0.0305342	0	-1	0.224138	-0.428571	0.151997	8.88178e-17	0.0416668	0.0049007
InorganicPP	Nontoxin	Nontoxin	58.31	131.25	105.29	85.38	88.76	90.96	140.35	135.94	104.53	29.0813	0.27821	FALSE	867	0.270238	0	4	3	3	0	3	4	7	-0.363944	-0.0665776	-0.511606	0.100833	-0.125	0.471428	0.127124	-0.6	-0.0514535	0.24	-0.0238096	0.0621291
InositolHexKin2	Nontoxin	Nontoxin	5.69	20.69	12.84	20.38	9.25	11.73	16.11	23.1	14.9737	6.13252	0.409551	FALSE	1272	0.186667	0	5	0	0	0	0	5	5	-1.25426		-1.25426	-0.213816	0	0.0857145	-0.0921457	0.6	-0.148077	-0.727777	0.0444444	0.0508565
InositolMonophosphatase1	Nontoxin	Nontoxin	12.44	23.52	16.41	17.32	20.66	9.68	62.19	25.96	23.5225	16.5305	0.702753	FALSE	837	0.25625	0	4	0	0	0	0	4	4	-0.468351		-0.468351	0.14087	0	0.6	0.18297	-0.272727	0.170122	0.128205	0.103175	0.30611
InsulinInd1	Nontoxin	Nontoxin	62.85	137.52	41.48	56.08	162.51	50.36	386.78	203.76	137.667	117.212	0.851417	TRUE	822	0.179167	0	1	1	1	0	1	1	2	-1.03789	-0.448318	-1.16221	-0.0441945		0.6	-0.0961538	0.6	-0.0961538	-0.2	0.0833335	-0.0147735
InsulinInd2	Nontoxin	Nontoxin	12.33	22.48	23.68	18.4	12.81	13.81	30.55	14.42	18.56	6.51311	0.350922	FALSE	678	0.179167	0	2	0	0	0	0	2	2	-1.03789		-1.03789	0.529829	0.5	0.514285	0.555556	0.6		0.666667	0.0833335	-0.00406455
IntegrinKin	Nontoxin	Nontoxin	20.51	28.76	5.95	18.75	13.79	17.9	25.2	33.43	20.5362	8.65234	0.42132	FALSE	1359	0.202652	0	6	2	2	0	2	6	8	-0.875858	-0.912045	-0.73065					-0.257143	-0.00915892	0.088889	-0.0574702	0.0357143
InterferonReg	Nontoxin	Nontoxin	14.44	51.69	57.08	40.44	31.11	55.94	44.08	24.33	39.8887	15.4786	0.388043	FALSE	1308	0.325	0	0	2	2	0	2	0	2	0.200738	0.200738		0.107237	0	1	0.232602	0.473684	0.0307876	-0.2	0.257576	0.0929266
Intraflagellar20	Nontoxin	Nontoxin	33.24	25.04	27.32	22.91	33.6	24.73	33.79	31.65	29.035	4.51852	0.155623	FALSE	399	0.308333	0	3	0	0	0	0	3	3	0.067026		0.067026	0.069264	-0.333333	-1	0.25	0.142857	0.41423		0.277778	0.121558
IPDPDIsomerase	Nontoxin	Nontoxin	114.96	269.77	162.56	130.04	209.27	148.69	430.45	285.37	218.889	106.002	0.484275	FALSE	684	0.125	0	2	0	0	0	0	2	2	-1.49796		-1.49796	0	0	-0.428571	0.131579				0	-0.0640732
IscU	Nontoxin	Nontoxin	51.03	147.1	64.24	132.3	60.64	163.04	129.44	132.19	109.998	44.0213	0.400202	FALSE	495	0.371212	0	5	1	1	0	1	5	6	0.69963	0.649981	0.592582					0.0818182	0.0515185	-0.185859	0.0175866	0.0436507
isletCell1	Nontoxin	Nontoxin	46.22	38.69	48.06	14.57	32.25	18.76	62.99	33.36	36.8625	15.8436	0.429802	TRUE	1548	0.452778	0	1	2	2	0	2	1	3	1.4565	1.82865	0.155746	0.558769	0	1	0.734694	0	0.484694	-0.153846	0.62963	0.513816
IsocitrateDH	Nontoxin	Nontoxin	57.83	95.45	41.18	60.75	37.2	40.34	76.72	98.27	63.4675	24.4087	0.384585	FALSE	1362	0.238095	0	7	0	0	0	0	7	7	0.203772		0.203772						0.107596		0.107596	0.107596
IsocitrateDHCyt	Nontoxin	Nontoxin	63.79	67.98	86.31	43.57	55.63	51.82	105.41	45.86	65.0463	21.3291	0.327906	FALSE	1248	0.288889	0	3	0	0	0	0	3	3	-0.120019		-0.120019	0.502725	0	1	0.0381301	0.736842	-0.0294	0.555556	0.0470087	0.011992
IST1	Nontoxin	Nontoxin	32.68	70.49	36.65	54.07	42.42	61.57	62.63	36.47	49.6225	14.3794	0.289776	FALSE
ITPPP	Nontoxin	Nontoxin	31.95	55.93	60.37	47.36	36.52	43.02	49.8	69.64	49.3238	12.4672	0.252762	FALSE	615	0.525	0	1	0	0	0	0	1	1	1.4737		1.4737	0.326656	0	-1	-0.15748		0.75431	0.666667	0.037037	0.450324
Jagunal-1	Nontoxin	Nontoxin	23.93	44.89	29.84	41.09	35.83	45.12	30.16	12.95	32.9763	11.1101	0.336912	FALSE	552	0.223333	0	5	0	0	0	0	5	5	-0.853303		-0.853303	0.0544318	0	0.057143	0.133448	0.163636	0.0279214	0.0666668	0.0820514	0.112827
JunctionPlakoglobin	Nontoxin	Nontoxin	21.08	30.04	32.26	15.92	16.28	12.89	36.24	31.17	24.485	8.95143	0.365588	FALSE	2235	0.211111	0	8	1	1	0	1	8	9	-1.09992	-1.16221	-0.950929	0.292453	0.416667	0.474185	0.270023	0.342857	0.0098768	0.0743592	0.0308641	-0.00497726
Katp60A1	Nontoxin	Nontoxin	8.67	9.33	8.35	12.32	6.98	6.82	14.92	14.89	10.285	3.31715	0.322523	FALSE	1479	0.242308	0	7	6	6	0	6	7	13	-0.755763	-1.21442	-0.210834	0.0788408	-0.0272727	-0.321428	0.131292	-0.127819	0.12068	0.171429	0.0211067	0.0563063
KeratinAsc2	Nontoxin	Nontoxin	326.4	469.67	322.18	600.11	236.26	411.41	254.19	286.11	363.291	123.498	0.339943	FALSE	411	0.3125	0	2	0	0	0	0	2	2	0.0945699		0.0945699	0.394737			0.451923		0.451923	0.3	0.333334	0.54947
KeratinII-8	Nontoxin	Nontoxin	0.71	5.44	25.05	35.24	2.59	3.65	18.9	14.91	13.3113	12.4298	0.933778	FALSE	1368	0.273016	0	4	3	3	0	3	4	7	-0.459151	-1.05204	0.13808		0.6		0.166667		-0.216326		0.204925	0.204925
KH-RNABinding3	Nontoxin	Nontoxin	11.16	39.08	18.84	27.25	18.25	25.91	27.96	16.89	23.1675	8.67558	0.374472	FALSE	1035	0.273958	0	7	1	1	0	1	7	8	-0.327867	1.03439	-0.628407	0.112504	-0.333333	0.390476	-0.0964126	-0.2	-0.154436	0.0689395	0.00351038	-0.105029
KIAA0319	Nontoxin	Nontoxin	14.92	36.83	12.42	14.65	14.58	17.02	18.44	8.77	17.2038	8.44635	0.49096	FALSE	2964	0.244167	0	14	6	6	0	6	14	20	-0.763478	-0.50454	-0.808751	0.115003	-0.25	-0.0244896	0.137386	0.263492	0.13051	-0.0820512	0.154246	0.0657999
KIAA1143	Nontoxin	Nontoxin	27.81	41.46	34.65	14.43	32.18	12.56	56.49	18.41	29.7488	14.8546	0.499337	FALSE	456	0.125	0	0	1	1	0	1	0	1	-1.16221	-1.16221		0	0			-0.428571	0.131579		0	-0.0640732
KIAA1324	Nontoxin	Nontoxin	108.01	79.78	93.61	103.05	66.61	83.41	166.68	157.38	107.316	36.2998	0.338251	FALSE	3048	0.197222	0	5	4	4	0	4	5	9	-1.26918	-1.11717	-1.10846	0.115572	0	0.6	0.123019	0.0857145	0.0731408	0.0500001	0.0701754	0.167679
KIAA1370	Nontoxin	Nontoxin	22.48	28.78	28.35	29.77	21.87	17.89	52.32	24.87	28.2912	10.5201	0.371849	FALSE	3222	0.23136	0	22	16	16	0	16	22	38	-0.972805	-1.06045	-0.833393	0.0479334	0.0617284	-0.0266027	0.093559	-0.0970778	0.0741976	-0.0745717	0.0419446	0.0433658
KinC-1	Nontoxin	Nontoxin	40.82	46.2	69.88	58.46	58.36	75.61	130.04	60.01	67.4225	27.6961	0.410784	FALSE	1452	0.275	0	5	2	2	0	2	5	7	-0.308268	0.519243	-0.671049	0.0713836	-0.277778	-0.0935062	0.159094	-0.490909	0.0661592	0.104274	0.0902256	0.186894
KinC-2	Nontoxin	Nontoxin	23.91	163.98	52.52	63.69	31.67	53.19	55.86	51.67	62.0613	43.2359	0.696665	TRUE	1374	0.330555	0	2	1	1	0	1	2	3	0.280792	-0.448318	0.660801	0.47623	0.333333	0.542857	0.777778	-0.136363	0.343568	0.666667	0.179654	0.242993
KinC-d	Nontoxin	Nontoxin	22.66	20.39	26.95	17.69	18.21	17.33	21.54	25.2	21.2462	3.54936	0.167058	FALSE	2046	0.179167	0	4	2	2	0	2	4	6	-1.38795	-0.57783	-1.54972	0.0461673	-0.333333	0.257143	0.00310632	0.257143	0.00310632	-0.0266666	0.0833335	0.0681816
KinII-d	Nontoxin	Nontoxin	80.74	64.09	99.81	103.7	49.53	83.7	183.26	108.41	96.655	40.3565	0.417532	FALSE	1437	0.191667	0	4	2	2	0	2	4	6	-1.24597	-1.49796	-0.792762	0.18484	0.222222	0.215038	0.245424	0.0857145	0.0798357	0.037607	0.074074	0.0723055
KishA	Nontoxin	Nontoxin	173.88	134.29	224.34	109.18	94.8	160.02	233.59	213.34	167.93	52.8942	0.314978	FALSE
KishB	Nontoxin	Nontoxin	96.72	175.56	186.3	135.26	145.21	134.27	232.53	135.95	155.225	41.5548	0.267707	FALSE
KOTransaminase1	Nontoxin	Nontoxin	25.58	32.6	32.19	31.94	39.3	36.31	48.67	29.4	34.4988	7.05267	0.204433	FALSE	1269	0.242424	0	8	3	3	0	3	8	11	-0.738919	-1.69654	-0.178332	0.201879	0.1	0.203711	0.206971	0.281633	0.0221745	0.208485	0.0428276	0.0985505
KRas	Nontoxin	Nontoxin	47.62	57.95	80.3	34.06	38.6	43.6	65.16	39.49	50.8475	15.7956	0.310646	FALSE	561	0.198611	0	5	1	1	0	1	5	6	-1.1671	-1.16221	-0.962656	0.127538	0.125	0.0857145	0.198928	0.0428572	0.256784	-0.290909	0.127778	0.0741571
la-rel4	Nontoxin	Nontoxin	18.34	22.02	27.64	14.92	20.7	22.75	30.51	13.67	21.3187	5.80247	0.272177	FALSE	2193	0.201515	0	7	4	4	0	4	7	11	-1.25178	-1.31182	-0.990304	0.0756314	0.0625	-0.285714	0.188454	-0.214285	0.216604	-0.0102562	0.0782828	0.105507
LactatDH-A	Nontoxin	Nontoxin	132.58	624.75	148.78	109.55	67.22	65.98	161.92	169.57	185.044	182.029	0.983706	TRUE	999	0.3625	0	2	0	0	0	0	2	2	0.519243		0.519243	0.501807	0	1	-0.0961538	0.736842	-0.163684	0.666667	0.0982905	-0.231289
LactoglutathioneLyase	Nontoxin	Nontoxin	45.2	102.08	112.6	58.11	65.61	72.39	112.5	77.32	80.7262	25.5362	0.316331	FALSE	552	0.288333	0	4	1	1	0	1	4	5	-0.142511	-1.16221	0.288607	0.0470256	0.25	0.3	-0.00276088	0.381818	-0.12706	-0.106667	0.0366668	-0.0166614
LAMTOR1	Nontoxin	Nontoxin	7.57	13.71	2.06	21.29	10.9	14.51	11.32	18.25	12.4512	6.01264	0.482894	FALSE	483	0.29945	0	8	1	1	0	1	8	9	-0.342071	-1.0535	-0.0850498	0.0963346	-0.333333		-0.2	0.134737	-0.0533397	0.206667	-0.0633014	0.0760642
LAMTOR2	Nontoxin	Nontoxin	152.05	190.13	122.51	188.92	110.94	96.12	159.37	115.65	141.961	35.9853	0.253486	FALSE	378	0.125	0	1	0	0	0	0	1	1	-1.16221		-1.16221	-0.210526			-0.0961538		-0.0961538	-0.4	0	0.0989399
lanC1	Nontoxin	Nontoxin	20.23	22.73	23.94	16.12	9.74	15.13	20.69	21.69	18.7838	4.75945	0.253381	FALSE	1200	0.325	0	1	0	0	0	0	1	1	0.155746		0.155746	0.0944882			0.204082		0.204082	-0.153846	0.222222	0.472843
LanosterolDemethylase	Nontoxin	Nontoxin	5.85	61.37	18.81	9.49	17.58	15.11	58.79	48	29.375	22.8	0.776171	FALSE	1503	0.179167	0	2	0	0	0	0	2	2	-1.03789		-1.03789	0.255319	0.25	0	0.343568				0.0833335	-0.00406455
laRel7	Nontoxin	Nontoxin	33.77	32.3	64.15	41.1	37.83	18.89	54.26	68.41	43.8387	17.0104	0.388021	FALSE	1770	0.347222	0	5	1	1	0	1	5	6	0.520845	-1.16221	0.987466	0.268723	-0.133333	-0.0253245	0.46669	-0.15974	0.329943	0.533334	0.134933	0.251848
LathoserolOx	Nontoxin	Nontoxin	48.42	128.97	102.87	97.03	69.64	58.87	80.78	181.67	96.0312	43.1668	0.449508	FALSE	873	0.224242	0	7	4	4	0	4	7	11	-0.966856	-0.316959	-1.21301	-0.155975	-0.104167	-0.324675	-0.0794328	-0.602226	-0.116916	-0.428571	-0.0412698	-0.0151642
LCFACoALig1	Nontoxin	Nontoxin	57.23	64.61	47.69	69.71	31	20.53	101.29	105.92	62.2475	30.3473	0.487527	FALSE	2097	0.125	0	1	3	3	0	3	1	4	-1.83088	-1.69654	-1.16221	-0.0206395		0.6	-0.0961538	0.6	-0.0961538	-0.133333	0	0.0581866
LCFACoALig3	Nontoxin	Nontoxin	146.09	218.39	169.62	121.24	142.64	100.64	149.41	163.4	151.429	34.9668	0.230912	FALSE	2154	0.279166	0	2	4	4	0	4	2	6	-0.252138	0.288607	-1.03789	0.515484	0.166667	0.609023	0.444403	0.714286	0.338319	0.533333	0.22037	0.098636
LCM1	Nontoxin	Nontoxin	29.55	61.25	31.86	43.28	33.11	43.01	41.74	31.55	39.4188	10.4611	0.265384	FALSE	978	0.2625	0	1	3	3	0	3	1	4	-0.403469	-0.814758	0.649981	0.246414	0.25	0.3	0.252304	0.257143	0.134615	0.222222	0.0555555	0.110981
LDH-B	Nontoxin	Nontoxin	139.23	390.19	278.69	242.45	169.84	157.04	292.55	407.78	259.721	102.692	0.395393	FALSE	1002	0.264815	0	7	2	2	0	2	7	9	-0.445439	-1.03789	-0.141238	0.0256156	-0.0833332	-0.567099	0.0709757	-0.350649	0.0817732	4.71865e-17	0.0481481	0.160949
LDLRec1	Nontoxin	Nontoxin	6.93	29.1	18.13	11.95	25.85	26.05	76.9	34.08	28.6238	21.4931	0.750882	TRUE	2616	0.427083	0	3	1	1	0	1	3	4	1.30509	1.4737	0.895369	0.650043		0.733333	0.725962	0.733333	0.725962	0.311111	0.678571	0.624854
Legumain	Nontoxin	Nontoxin	25.42	38.69	40.93	33.42	18.71	22.61	44.15	25.39	31.165	9.41387	0.302065	FALSE	1296	0.175	0	2	2	2	0	2	2	4	-1.31182	-1.49796	-0.648609	0.0206284	0	0.6	-0.0066312	0.0857145	-0.12284	-0.0333333	-0.0166667	0.0499275
Leptin1	Nontoxin	Nontoxin	8.23	14.5	20.05	14.77	17.04	9.19	14.67	23.39	15.23	5.06576	0.332618	FALSE	396	0.125	0	0	1	1	0	1	0	1	-1.16221	-1.16221		-0.210526			-0.0961538		-0.0961538	-0.4	0	0.0989399
LeptinReceptor	Nontoxin	Nontoxin	17.21	18.12	18.14	17.59	9.74	11.69	20.54	21.39	16.8025	4.05923	0.241585	FALSE	396	0.233333	0	1	0	0	0	0	1	1	-0.448318		-0.448318	1		1		1		1	0	-0.132075
Leukemia1	Nontoxin	Nontoxin	13.7	41.91	14.13	26.52	16.64	19.32	23.6	31.53	23.4187	9.71637	0.414897	FALSE	1035	0.125	0	1	1	1	0	1	1	2	-1.49796	-1.16221	-1.16221	0.169247		0.6	-0.0961538	0.6	-0.0961538	0.133333	0	0.0174334
LeukemiaInh	Nontoxin	Nontoxin	13.42	27.13	24.86	8.56	12.4	15.31	33.76	25.39	20.1037	8.83731	0.439585	FALSE	3288	0.222619	0	8	6	6	0	6	8	14	-1.01613	-1.38795	-0.552169	-0.0860216	-0.277778	-0.357142	0.0678905	-0.914285	0.0589856	-0.204102	0.0850341	0.152075
LeuRich1	Nontoxin	Nontoxin	11.45	21.44	17.85	21.15	12.13	14.61	28.92	20.54	18.5113	5.78467	0.312495	FALSE	1575	0.224167	0	9	1	1	0	1	9	10	-0.955375	-0.448318	-0.953226	0.122572	-0.0416666	-0.406638	0.268282	0.109091	0.40053	0.4	0.0883573	0.0650909
LeuRich20	Nontoxin	Nontoxin	18.76	32.01	35.46	27.86	20.21	31.22	45.5	25.94	29.62	8.59967	0.290333	FALSE	540	0.175	0	4	0	0	0	0	4	4	-1.31182		-1.31182	-0.0854185	-0.166667	-0.714286	0.0951417	-0.428571	0.0556681	-0.4	0.0555555	0.00626583
LeuRich59	Nontoxin	Nontoxin	27.85	53.65	45.89	39.77	46.52	48.99	58.43	40.48	45.1975	9.37934	0.207519	FALSE	918	0.269792	0	7	1	1	0	1	7	8	-0.377712	-1.16221	-0.127319	0.0996183	-0.333333	-0.405714	0.230241	-0.105974	0.220144	0.2	0.175278	0.211338
LeuRichPPR	Nontoxin	Nontoxin	36.37	49.04	66.11	46.47	31.43	34.6	74.8	86.05	53.1088	20.2767	0.381797	FALSE	4134	0.186905	0	14	7	7	0	7	14	21	-1.53377	-2.06208	-1.07758	0.0435535	0	0.321429	0.0663958	-0.00389588	-0.0167639	-0.0148147	0.0327963	0.100294
LeuRichRepeat-57	Nontoxin	Nontoxin	14.86	40.63	45.93	33.29	21.16	23.23	34.05	31.69	30.605	10.3311	0.337561	FALSE	717	0.3125	0	1	1	1	0	1	1	2	0.0945699	-1.16221	1.30896	-0.00350263	0	0.6	0.368421	-0.350649	0.0259806	-1.11111	0.149123	0.0818104
LIM-SH3	Nontoxin	Nontoxin	13.69	23.58	29.94	7.53	14.95	15.34	22.14	17.75	18.115	6.92172	0.382099	FALSE	801	0.169048	1	3	3	3	1	4	3	7	-1.54707	-1.54972	-1.05524	0.0847263	0	0.0857145	0.0984541	-0.27619	0.128763	0.0666667	0.047619	0.0635735
LipidPPH2	Nontoxin	Nontoxin	8.12	18.95	9.05	16.33	20.02	17.66	17.41	19.09	15.8287	4.62023	0.291889	FALSE	858	0.203296	0	4	0	0	0	0	4	4	-1.03817		-1.03817	-0.238127	-0.428571		-0.4	-0.350649	-0.0729856	-0.133333	-0.103095	0.0182268
LipoylSyn	Nontoxin	Nontoxin	13.41	20.26	22.86	21.2	17.22	23.72	22.76	15.42	19.6062	3.81792	0.19473	FALSE	1155	0.27598	0	12	5	5	0	5	12	17	-0.334056	-0.288315	-0.316595	-0.124186	-0.153846	-0.483117	-0.0645191	-0.362193	-0.0816428	-0.264336	-0.0261437	-0.0314717
LLP	Nontoxin	Nontoxin	85.83	123.61	132.45	88.77	85.68	72.01	166.53	117.95	109.104	31.6482	0.290074	FALSE	369	0.125	0	0	1	1	0	1	0	1	-1.16221	-1.16221		0	0			-0.428571	0.131579		0	-0.0640732
LMWPTyrPP	Nontoxin	Nontoxin	56.22	77.22	109.42	58.94	54.44	80.11	107.44	60.23	75.5025	22.4168	0.296901	FALSE
LOC100559892	Nontoxin	Nontoxin	15.07	23.95	29.14	18.58	21.31	38.43	29.45	10.99	23.365	8.83775	0.378248	FALSE	282	0.5	0	1	0	0	0	0	1	1	1.30896		1.30896	-0.429379	-0.5	-0.428571	-0.21978	-1	-0.568182	-0.153846	-0.244444	-0.156502
LOC100567767	Nontoxin	Nontoxin	145.07	277.39	260.82	238.06	160.1	252.93	324.81	261.24	240.052	59.8116	0.249161	FALSE	225	0.179167	0	1	1	1	0	1	1	2	-1.03789	-1.16221	-0.448318	0.394737		1	-0.0961538	1	-0.0961538	0.3	0	-0.0165676
LOC100687415	Nontoxin	Nontoxin	19.8	41.99	22.12	38.03	24.34	53.36	46.35	15.5	32.6863	13.9997	0.428306	FALSE	375	0.125	0	2	0	0	0	0	2	2	-1.49796		-1.49796	0.169247		0.6	-0.0961538	0.6	-0.0961538	0.133333	0	0.0174334
LOC395778	Nontoxin	Nontoxin	18.17	41.94	37.03	33.75	14.99	29.97	44.59	52.94	34.1725	12.9346	0.37851	FALSE	981	0.408333	0	3	2	2	0	2	3	5	1.16972	0.200738	1.56339	0.258096	0.3	0.0476193	0.284023	0.582707	0.031616	0.239316	0.0733332	0.0640368
LOC417941	Nontoxin	Nontoxin	17.2	32.99	35.74	16.1	24.5	23.2	32.24	20.75	25.34	7.48602	0.295423	FALSE	603	0.178571	0	7	0	0	0	0	7	7	-1.43572		-1.43572	-0.0283059	0.333333		-0.0424402	0.0476193	0.062843	-0.32	-0.0119048	0.00215946
LOC427100	Nontoxin	Nontoxin	66.51	81.75	86.66	53.11	39.34	52.49	64.74	63.8	63.55	15.5517	0.244716	FALSE	567	0.4	0	1	0	0	0	0	1	1	0.649981		0.649981	0.541833			0.561358		0.561358	0.444444	0.416667	0.704097
LPCAcyltransferase2	Nontoxin	Nontoxin	381.63	372.04	306	551.8	201.62	570.81	433.86	553.04	421.35	132.261	0.313898	FALSE	1656	0.287222	0	9	6	6	0	6	9	15	-0.183845	-0.220587	-0.129484	0.31962	0.142857	0.174603	0.323872	0.343358	0.374362	0.264615	0.158148	0.172182
LSM10	Nontoxin	Nontoxin	7.32	0	1.04	30.59	31.06	34.46	32.94	26.18	20.4488	14.9659	0.731875	TRUE	378	0.459596	0	2	1	1	0	1	2	3	1.42385	-0.0334055	1.9073					0.6	0.577924	0.272727	0.36288	0.522727
LSM12	Nontoxin	Nontoxin	18.76	37.87	28.49	24.83	35	27.85	43.78	19.85	29.5537	8.76864	0.296702	FALSE	585	0.161111	0	2	1	1	0	1	2	3	-1.34917	-0.448318	-1.49796	0.100037	0.25		-0.0961538	0	0.196994	-0.4	0.0555557	0.0302703
LSM14A	Nontoxin	Nontoxin	20.06	49.54	26.62	27.83	27.81	37.82	52.02	35.74	34.68	11.3723	0.327921	FALSE	1386	0.21875	0	2	2	2	0	2	2	4	-0.857644	-1.49796	0.0945699	-0.112209	0	0.473684	-0.12706	1	-0.0210948	-0.338462	0.0745615	0.0350794
LSm4	Nontoxin	Nontoxin	17.59	31.92	39.67	37.5	45.87	37.03	46.01	26.54	35.2662	9.67438	0.274324	FALSE	420	0.227778	0	2	1	1	0	1	2	3	-0.707875	0.155746	-1.03789	-0.00300367	-0.25	-0.714286	0.184664	-0.428571	0.151997	8.88178e-17	0.12963	0.112674
LSm6	Nontoxin	Nontoxin	18	30.44	43.89	25.68	34	17.35	43.84	18.76	28.995	10.965	0.378168	FALSE
LThr3DH	Nontoxin	Nontoxin	33.31	14.62	32.13	13.83	28.65	25.3	41.1	61.08	31.2525	15.1848	0.485874	FALSE	1131	0.379167	0	1	1	1	0	1	1	2	0.660801	-0.448318	1.4737	0.444827	-0.5	0.736842	0.157729	0	-0.323194	0.5	0.0555555	-0.141893
LTV1	Nontoxin	Nontoxin	30.55	39.77	72.4	37.03	45.29	39.55	79.38	41.09	48.1325	17.7241	0.368235	FALSE	1434	0.280952	0	2	5	5	0	5	2	7	-0.238672	-0.014933	-0.57783	0.15209	-0.138889	0.0116885	0.303829	-0.310575	0.154065	0.5	0.0778824	0.0946865
Lumican	Nontoxin	Nontoxin	32.3	22.37	133.15	12.99	12.63	17.79	45.4	19.47	37.0125	40.3524	1.09024	FALSE	1035	0.146667	0	5	0	0	0	0	5	5	-1.69167		-1.69167	0.157895	0	-0.0714282	0.0746458	1	-0.0961538	0.3	0	-0.0450709
LupusLa	Nontoxin	Nontoxin	40.54	76.08	113.79	60.3	82.75	99.76	86.51	48.89	76.0775	25.0356	0.32908	FALSE	1227	0.252381	0	6	1	1	0	1	6	7	-0.572731	0.649981	-0.835818	-0.0169123	0.166667	0.428571	0.0360717	0.0225565	-0.0711465	-0.433333	0.0744812	0.0695433
LYR-5	Nontoxin	Nontoxin	231.5	250.47	216.18	201.48	86.95	99.64	127.57	327.17	192.62	82.4954	0.428281	FALSE	255	0.379167	0	1	1	1	0	1	1	2	0.660801	-0.448318	1.4737	-0.0978965	-0.5	0	0.06741	-1.8	-0.07539	-0.090909	0.0416668	0.142634
LysMpeptidoglycanBinding3	Nontoxin	Nontoxin	32.92	41.41	41.09	24.01	38.78	27.4	38.55	25.06	33.6525	7.29198	0.216685	FALSE	849	0.161111	0	3	0	0	0	0	3	3	-1.34917		-1.34917	-0.140351	0		-0.0961538	-1	0.0192308	-0.4	0	0.0219349
LysoAcyl5	Nontoxin	Nontoxin	13.17	8.31	11.95	38.13	13.41	11.2	22.15	30.74	18.6325	10.7084	0.574714	FALSE	1443	0.241667	0	4	3	3	0	3	4	7	-0.698003	-1.34917	0.00745111	-0.0408586	-0.333333	-0.584962	0.139218	-0.532467	0.138126	-0.133333	0.142607	0.147403
LysophospholipidAcyltransferase1	Nontoxin	Nontoxin	9.53	25.84	18.09	10.7	37.87	34.98	30.22	10.75	22.2475	11.509	0.517317	FALSE	1485	0.212037	0	3	6	6	0	6	3	9	-1.08864	-0.898919	-1.05524	0.0967105	0.0833333	-0.0514284	0.158786	-0.085714	0.0384282	-0.008205	0.0329535	0.0645891
LysosomalAcidLipase	Nontoxin	Nontoxin	36.23	79.42	65.17	63.69	42.35	49.48	96.9	82.75	64.4988	21.1185	0.327426	FALSE	1203	0.205	1	6	3	3	1	4	6	10	-1.19257	-0.836016	-1.21442	-0.0829146	-0.138889	-0.523809	0.0290142	-0.714286	0.00435223	-0.266667	0.027436	0.0294678
LysosomalAcidP	Nontoxin	Nontoxin	13.8	25.51	26.1	18.55	21.18	21.6	34.18	16.93	22.2312	6.35536	0.285875	FALSE	1287	0.295833	0	5	3	3	0	3	5	8	-0.0661811	-0.14674	0.00329248	0.00630649	0	0.381818	0.0719401	0.394286	0.132378	-0.483117	0.206945	0.184799
LysosomalTMP4A	Nontoxin	Nontoxin	72.51	157.9	101.03	124.77	75.23	130.55	130.56	114.34	113.361	29.2305	0.257852	FALSE	693	0.197222	0	3	0	0	0	0	3	3	-1.0018		-1.0018	0.0454433	0	0.6	-0.0961538	0.163636	-0.0202429	0.088889	0.00793667	0.008799
MacrophageCapping	Nontoxin	Nontoxin	6.93	24.53	24.37	19.06	13.4	21.15	20.17	17.44	18.3813	5.87766	0.319764	FALSE	1050	0.245833	0	1	3	3	0	3	1	4	-0.576488	-0.494109	-0.448318	0.0313232	0	-0.233766	0.075188	-0.033766	-0.022316	0.242424	-0.0523809	-0.0330525
MacrophageMigInh	Nontoxin	Nontoxin	21.85	6.92	0	132.45	53.66	158.71	88.07	291.66	94.165	98.5771	1.04685	TRUE	348	0.30303	0	0	1	1	0	1	0	1	-0.0334055	-0.0334055						0.428571	0.555556		0.6	0.25
MAD4	Nontoxin	Nontoxin	14.56	35.8	17.84	26.44	21.73	24.77	29.22	25.97	24.5413	6.62015	0.269756	FALSE	1659	0.208333	0	3	1	1	0	1	3	4	-0.965781	-1.16221	-0.627713	0.497259	0.5	0.6	1	0.342857	0.131579	0.666667	0.0208333	0.0242644
mAdenylateKin4	Nontoxin	Nontoxin	17.2	37.37	34.23	31.55	7.36	13.22	26.94	33.07	25.1175	11.0884	0.441461	FALSE	672	0.525	0	0	1	1	0	1	0	1	1.4737	1.4737		0.77292		1	0.75431	1	0.75431	-0.4	0.857143	0.450324
MagoNashi-2	Nontoxin	Nontoxin	23.1	70.94	96.22	46.88	49.44	72.54	111.86	62.79	66.7212	28.2082	0.422777	FALSE
MagTran1	Nontoxin	Nontoxin	57.75	114.87	76.96	53.97	105	79.71	103.99	61.21	81.6825	23.6909	0.290036	FALSE	906	0.179167	0	2	0	0	0	0	2	2	-1.03789		-1.03789	0.0610685	0		0.172414	-0.428571	0.151997	8.88178e-17	0.0833335	0.141876
MajorVault	Nontoxin	Nontoxin	22.02	41.68	35.18	17.26	32.43	18.68	46.92	22.14	29.5388	11.1461	0.377339	FALSE	2532	0.28125	0	9	3	3	0	3	9	12	-0.254977	-0.17346	-0.253609	0.0744593	-0.148148	-0.108212	0.226017	-0.669841	0.0509553	0.330159	0.0263996	0.0754922
MAK16	Nontoxin	Nontoxin	17.6	21.46	26.52	17.34	11.74	17.6	16.2	13.2	17.7075	4.63065	0.261508	FALSE	882	0.233333	0	2	0	0	0	0	2	2	-0.57783		-0.57783	-0.21875	0	-1	0.025		-0.2	-1	0	0.028557
MAL2	Nontoxin	Nontoxin	26.82	56.21	47.48	35.42	37.39	57.56	59.27	31.15	43.9125	12.8495	0.292615	FALSE	555	0.191209	0	2	3	3	0	3	2	5	-1.22451	-1.15395	-0.84939	0.030967	-0.428571		-0.266667	0.257143	0.0279214	0.0666668	0.0418237	0.0220965
MalateDH	Nontoxin	Nontoxin	135.4	167.2	209.63	227.87	106.46	169.97	240.94	212.39	183.733	47.0297	0.255968	FALSE	1008	0.235417	0	4	0	0	0	0	4	4	-0.684625		-0.684625	0.0362802	0.333334	0.285714	-0.141174	-0.428571	0.113432	-0.05	-0.095238	0.0896674
MaleEnh1	Nontoxin	Nontoxin	42.2	56.93	72.66	54.84	31.01	41.63	70.67	87.65	57.1988	18.9233	0.330834	FALSE	543	0.3125	0	1	1	1	0	1	1	2	0.0945699	-1.16221	1.30896	0.107237		1	0.136134	1	0.136134	-0.7	0.333334	0.125305
MaleylacetoacetateIsomerase	Nontoxin	Nontoxin	32.73	110.68	54.05	72.79	70.68	55.97	80.65	26.13	62.96	27.1107	0.430601	FALSE	651	0.234375	1	5	2	2	1	3	5	8	-0.801394	-0.814758	-0.616373	0.132341	0.166667	0.083117	0.0918994	0.425455	-0.0920198	0.0126987	-0.00833334	0.0263776
MalignantTCell	Nontoxin	Nontoxin	116.14	190.05	180.19	167	116.38	93.18	285.73	330.62	184.911	84.1814	0.455253	FALSE	546	0.5	0	1	0	0	0	0	1	1	1.30896		1.30896	0.0996441	0.2	-0.272727	-0.231214	-0.272727	0.396601	1.11022e-16	0	0.0989399
Man9GlcNAc2	Nontoxin	Nontoxin	12.76	7.67	9.5	14.25	7.38	11.09	9.02	26.37	12.255	6.18372	0.504587	FALSE	1524	0.240476	0	5	2	2	0	2	5	7	-0.711922	0.236128	-1.05378	0.074586	0.125	-0.428571	0.266238	-0.333333	0.0382174	0.0933334	0.0444444	0.194474
MannOligoGluc	Nontoxin	Nontoxin	27.27	22.24	4.71	18.57	26.31	34.11	25.87	11.7	21.3475	9.42208	0.441367	FALSE	2127	0.235043	0	9	9	9	0	9	9	18	-0.722022	-1.40793	0.0119137	0.0398638	-0.339635		0.208947	-0.499931	0.0633814	0.113131	0.0216414	-0.00291374
Mannose1PGT-b	Nontoxin	Nontoxin	56.76	47.73	80.57	42.1	56.37	69.7	71.7	29.05	56.7475	16.9959	0.2995	FALSE	1083	0.125	0	2	0	0	0	0	2	2	-1.49796		-1.49796	0.27451	0	0.6		0.0857145	0.131579	0.666667	0	-0.0640732
MannosidaseIB	Nontoxin	Nontoxin	109.29	184.51	117.73	112.72	160.45	226.85	209.56	92.81	151.74	50.8336	0.335005	FALSE	1368	0.325	0	1	0	0	0	0	1	1	0.155746		0.155746	-0.462428	0	-0.428571	-0.513393		-0.2	-1	-0.2	-0.068713
Mannosyltransferase	Nontoxin	Nontoxin	13.77	25.09	18.18	19.35	15.55	28.57	24.45	25.25	21.2762	5.29201	0.248729	FALSE	1314	0.32197	0	8	4	4	0	4	8	12	0.945639	0.0937468	1.22747					0.605263	-0.0845885	-0.0664958	-0.126771	0.0375
Maspardin	Nontoxin	Nontoxin	10.83	29.78	32.77	26.44	13.62	21.07	33.6	21.42	23.6912	8.48618	0.358199	FALSE	936	0.252778	0	3	0	0	0	0	3	3	-0.467388		-0.467388	0.110436	0	-0.428571	0.165072	-0.428571	0.198928	0.022222	0.09127	0.170512
MBTFS1Protease	Nontoxin	Nontoxin	22.71	41.64	22.67	32.51	26.81	35.36	29.48	26.77	29.7437	6.5219	0.21927	FALSE	3183	0.253472	0	11	1	1	0	1	11	12	-0.607078	-1.16221	-0.453998	0.0401552	-0.047619	0.198282	0.139286	0.0620643	0.152444	-0.32674	0.135654	0.079216
MCFD2	Nontoxin	Nontoxin	262.44	218.69	231.21	112.44	207.34	133.84	271.34	214.86	206.52	56.4295	0.27324	FALSE	444	0.197222	0	1	2	2	0	2	1	3	-1.0018	-0.57783	-1.16221	0.183007	0	0.6		-0.466667	0.25	0.666667	0	-0.109408
mCG18710	Nontoxin	Nontoxin	34.37	88.21	28.16	50.11	49.45	49.07	57.34	60.96	52.2087	18.1951	0.348507	FALSE	909	0.258333	0	3	0	0	0	0	3	3	-0.413947		-0.413947	-0.0071832	0	-1.8	0.119309	0.6	0.0539641	0.037607	0.00740733	0.208684
MCP	Nontoxin	Nontoxin	7.64	20.26	6.26	24.55	19.38	38.78	17.95	26.51	20.1662	10.4318	0.517292	FALSE	924	0.380952	0	6	0	0	0	0	6	6	0.615496		0.615496						-0.05		-0.05	-0.05
mDicarboxylateCarrier	Nontoxin	Nontoxin	27.69	35.68	27.95	30.23	27.75	32.42	49.11	13.39	30.5275	9.94004	0.325609	FALSE	861	0.316667	0	4	1	1	0	1	4	5	0.167321	0.649981	-0.057431	0.345834	0.333333	0	0.394079	0.251948	0.440737	0.344444	0.177018	0.311779
mDienoylCoAisomerase	Nontoxin	Nontoxin	14.31	26.71	18.67	40.3	18.41	21.31	19.86	17.11	22.085	8.1862	0.370668	FALSE	963	0.304762	0	4	3	3	0	3	4	7	0.03971	0.254071	-0.143941	-0.00488186	-0.0666666	-0.25	5.06667e-06	0.129023	0.0203446	-0.0148148	0.00342519	0.0485821
mDienoylCoAreductase	Nontoxin	Nontoxin	60.41	71.2	68.61	60.2	52.42	56.23	58.04	56.72	60.4788	6.37199	0.105359	FALSE	1011	0.225	0	3	1	1	0	1	3	4	-0.792762	1.4737	-1.69654	0.0964177	0	1	0.269231	0.0225565	0.170365	-0.4	0.214286	0.173444
mDNABinding	Nontoxin	Nontoxin	22.96	43.09	52.32	19.28	21.29	24.98	41.89	20.43	30.78	12.8906	0.418796	FALSE
MedRNAPolII	Nontoxin	Nontoxin	71.26	81.02	101.9	64.26	64.58	73.92	143.03	73.87	84.23	26.5834	0.315605	FALSE	405	0.202083	0	4	0	0	0	0	4	4	-1.03066		-1.03066	0.225194	0	0.8		-0.164046	0.131579	0.833333	-0.0857143	-0.00448313
MedRNAPolII21	Nontoxin	Nontoxin	12.91	46.85	20.57	42.44	20.78	52.65	36.31	43.71	34.5275	14.5479	0.421343	FALSE	432	0.236111	0	3	0	0	0	0	3	3	-0.627713		-0.627713	-0.0470539	-0.25	0	0.229701	-1.11429	0.0951417	0.133333	0.0555557	0.134038
MemMgTrans	Nontoxin	Nontoxin	121.03	158.85	160.88	183.64	119.11	173.34	271.62	179.61	171.01	47.5145	0.277846	FALSE	402	0.362637	0	0	1	1	0	1	0	1	0.381009	0.381009		-0.0783582	-1			-1.8	0.25	0.666667	-0.157631	0.1485
MEMO1	Nontoxin	Nontoxin	30.17	52.9	28.15	43.5	47.38	44.58	43.2	34.41	40.5362	8.70418	0.214726	FALSE	894	0.279166	0	2	0	0	0	0	2	2	-0.188546		-0.188546	0.159604	0	0.6	0.204082	-0.272727	0.16783	0.25641	0.0396825	0.264394
MetAdenosyltransferase2b	Nontoxin	Nontoxin	10.55	20.73	17.21	19.14	12.68	16.6	13.29	18.03	16.0287	3.50998	0.21898	FALSE	1005	0.288889	0	2	1	1	0	1	2	3	-0.120019	0.649981	-0.57783	-0.0116717	0	1	-0.0961538	-0.127819	-0.231214	-0.0444443	-0.103785	-0.145583
Metaxin2-2	Nontoxin	Nontoxin	16.74	19.14	25.46	20.6	16.42	15.94	24.11	17.71	19.515	3.6074	0.184853	FALSE	777	0.125	1	2	0	0	1	1	2	3	-1.69654	-1.16221	-1.49796	-0.140351	0	-0.428571	-0.0202429		-0.0961538	-0.4	0	0.0446022
Meteorin	Nontoxin	Nontoxin	27.49	113.77	57.85	69.44	29.45	77.04	109.24	68.74	69.1275	31.8478	0.460711	FALSE	897	0.205	0	4	1	1	0	1	4	5	-1.05378	-1.16221	-0.792762	-0.185663	-0.166666	0.0857145	-0.15588	-0.085714	-0.0983885	-0.577778	0.0311111	-0.0136561
MethionineAminopeptidase1	Nontoxin	Nontoxin	17.77	34.93	24.02	17.4	16.59	25.11	32.25	29.01	24.635	7.04998	0.286177	FALSE	1161	0.179167	0	2	0	0	0	0	2	2	-1.03789		-1.03789	-0.324013			-0.148077		-0.148077	-0.7	0	0.144064
MethionylAminopeptidase2	Nontoxin	Nontoxin	52.82	72.42	82.67	82.35	35.75	66.14	110.73	109.89	76.5962	25.9232	0.338439	FALSE	1443	0.343333	0	4	1	1	0	1	4	5	0.458929	1.52862	-0.057431	0.351875	0	0.691228	0.438748	0.542857	0.448856	-0.266667	0.436	0.266615
Methylosome-pICIn	Nontoxin	Nontoxin	21.79	52.09	35.53	50.07	37.73	65.55	53.39	38.19	44.2925	13.5872	0.30676	FALSE	714	0.206044	0	6	2	2	0	2	6	8	-1.16379	-1.35784	-0.868012	0.0923646	-0.281632		0.311111	-0.281632	0.115284	0.311111	0.0329945	0.0236172
MethylsterolOx	Nontoxin	Nontoxin	147.16	339.07	379.66	312.53	318.65	217.7	643.28	541.27	362.415	161.863	0.446624	FALSE	894	0.530555	0	3	0	0	0	0	3	3	2.20468		2.20468	0.2687	-0.333333	-0.272727	0.511797	-0.272727	0.511797	0.222222	0.393939	0.455459
MethylsterolOx_2	Nontoxin	Nontoxin	3.7	0.28	0.88	25.83	2.64	1.25	3.84	2.48	5.1125	8.46892	1.65651	FALSE	894	0	0	0	2	2	0	2	0	2
Methylthioribulose-P-Dehydratase	Nontoxin	Nontoxin	41.58	31.2	31.33	19.72	17.15	32.74	29.2	53.44	32.045	11.5402	0.360124	FALSE	732	0.146667	0	1	4	4	0	4	1	5	-1.69167	-1.54972	-1.16221	-0.0619064	0	0.6	-0.130769	0.0857145	-0.0651821	-0.283333	0	0.0517845
Methyltransferase-METT10D	Nontoxin	Nontoxin	8.75	17.79	22.71	5.76	12.19	6.92	14.85	13.89	12.8575	5.72442	0.44522	FALSE	1680	0.210989	0	2	3	3	0	3	2	5	-1.01027	-1.15395	-0.433383	0.0614294		0.6	0.108663		-0.1	0.0533334	0.055592	0.182409
Methyltransferase-WBSCR22	Nontoxin	Nontoxin	15.53	31.05	32.06	24.12	23.22	26.39	30.52	29.8	26.5863	5.54698	0.208641	FALSE	846	0.232292	0	3	5	5	0	5	3	8	-0.826316	-1.09023	-0.17346	0.12379	-0.25	0.3	0.166302	0.0666667	0.121163	0.0262108	0.152778	0.16657
Methyltransferase5	Nontoxin	Nontoxin	41.81	36.63	72.34	30.71	33.77	32.5	59.72	37.55	43.1288	14.921	0.345963	FALSE
Methyltransferase7A	Nontoxin	Nontoxin	34.23	55.8	28.04	41.08	15.37	26.13	21.42	36.35	32.3025	12.5964	0.389951	FALSE	729	0.4	0	1	0	0	0	0	1	1	0.649981		0.649981	0.258065			0.368421		0.368421	0	0.333333	0.634146
Methyltransferase9	Nontoxin	Nontoxin	74.04	114.12	56.05	104.36	68.54	100.67	78.6	78.67	84.3813	19.9121	0.235978	FALSE	966	0.353535	0	3	0	0	0	0	3	3	0.426271		0.426271					-0.272727	-0.16786	-0.193939	-0.137222	-0.0654762
MettRnaSynth	Nontoxin	Nontoxin	27.65	50.16	21.54	29.45	27.48	28.92	32.17	25.91	30.41	8.54761	0.281079	FALSE	2676	0.22197	0	6	5	5	0	5	6	11	-0.995348	-1.25426	-0.567641	0.117411	-0.06	0.163402	0.178769	-0.00816314	0.0817943	0.0380954	0.0915736	0.085908
mFumarateHydratase	Nontoxin	Nontoxin	129.13	212.24	230.81	121.59	109.79	60.78	317.3	463.32	205.62	132.36	0.643711	FALSE	1521	0.161111	0	3	0	0	0	0	3	3	-1.34917		-1.34917	0.112831	0	-0.2	0.0769231	0.6	-0.0961538	0.133333	0	-0.0324028
MGAGAT	Nontoxin	Nontoxin	16.08	27.79	15.53	39.63	26	42.09	35.49	21.32	27.9913	10.2549	0.36636	FALSE	1371	0.287879	0	6	0	0	0	0	6	6	-0.225846		-0.225846					0.481818	-0.0520014	-0.0700853	-0.0372663	-0.0833333
MgPP	Nontoxin	Nontoxin	8.46	27.64	27.85	21.46	8.41	19.49	14.33	11.48	17.39	7.92938	0.455974	FALSE	510	0.197222	0	2	1	1	0	1	2	3	-1.0018	-0.448318	-1.03789	-0.140351	0		-0.0961538	-0.428571	-0.110283	-0.4	-0.095238	-0.107016
MgTransporter-NIPA2-1	Nontoxin	Nontoxin	13.13	29.12	17.32	24.52	14	21.57	23.74	10.9	19.2875	6.42746	0.333245	FALSE	1086	0.279166	0	1	1	1	0	1	1	2	-0.188546	0.155746	-0.448318	0.593347	0.25	0.714286	0.555556	0.473684	0.131579	1	-0.0166665	0.055107
MHC-H13	Nontoxin	Nontoxin	222.52	556.43	242.41	409.61	385.68	440.36	376.76	268.26	362.754	113.091	0.311758	FALSE	1113	0.338384	0	6	0	0	0	0	6	6	1.04619		1.04619					0.442424	0.224845	-0.312121	0.214022	0.148214
mHydroxyisobutyrateDH	Nontoxin	Nontoxin	51.24	39.59	57.6	28.84	29.11	26.54	58.5	50.36	42.7225	13.3677	0.312895	FALSE	993	0.347917	0	3	1	1	0	1	3	4	0.483253	-0.448318	0.815206	0.548246	0	0.3	0.668103	0.733333	0.877155	0.333334	0.430555	0.289032
Microfibril3	Nontoxin	Nontoxin	12.44	20.11	20.93	9.08	18.52	15.26	23.18	18.31	17.2288	4.68226	0.27177	FALSE	1041	0.302198	0	4	8	8	0	8	4	12	0.315482	0.11243	0.543722	-0.214516	-0.0865798	-0.138528	-0.0307921		-0.531515	-0.370629	-0.0163097	-0.0105407
Microfibrillar1	Nontoxin	Nontoxin	14.4	56.14	24.36	39.36	20.51	41.7	42.93	29.05	33.5562	13.8355	0.412307	FALSE	1323	0.216117	0	3	0	0	0	0	3	3	-0.839843		-0.839843	0.0805377	-0.428571		0.4	-0.428571	0.239234	0.4	0.13495	0.149763
MicrotubuleAss	Nontoxin	Nontoxin	152.05	263.04	165.08	246.29	160.65	231.24	241.18	129.47	198.625	51.8444	0.261017	FALSE
MicrotubuleAss1-3a	Nontoxin	Nontoxin	20.71	51.25	28.66	38.98	16.1	41.36	21.42	24.73	30.4013	12.2046	0.40145	FALSE	366	0.191667	0	3	0	0	0	0	3	3	-1.05524		-1.05524	0.338045	0.25	0.3	0.555556	0.257143	0.131579	0.666667	-0.0222222	0.0174589
MicrotubuleAssRP-EB	Nontoxin	Nontoxin	36.59	120.22	45.71	76.4	63.09	96.98	106.35	60.05	75.6737	29.7794	0.393524	FALSE	804	0.252273	0	11	0	0	0	0	11	11	-0.615453		-0.615453	0.384792	0	0.828571	0.329078	0.293534	0.168732	0.348148	0.0781241	0.0608616
MicrotubuleReg1	Nontoxin	Nontoxin	33.96	17.28	17.65	10.58	7.15	15.38	5.99	12.65	15.08	8.78031	0.582249	FALSE	948	0.533333	0	1	0	0	0	0	1	1	1.52862		1.52862	-0.619718	-1	-1	-0.615385	-1	-0.615385	0	-0.333333	-0.179775
MID1	Nontoxin	Nontoxin	3.91	26.56	21.14	37.13	21.68	26.26	34.56	51.19	27.8038	13.8166	0.496933	FALSE	516	0.5	0	1	0	0	0	0	1	1	1.30896		1.30896	0.422111	0	1	0.454545	0.473684	0.0543478	0.4	0.368421	-0.0640732
MIF4G	Nontoxin	Nontoxin	10.18	17.57	14.64	9.84	14.1	9.12	10.22	17.38	12.8812	3.47598	0.269848	FALSE	669	0.4	0	1	0	0	0	0	1	1	0.649981		0.649981	0.386037	0.666667		-0.0961538	0.473684	0.396601	-0.4	-0.025641	-0.179775
Mimecan	Nontoxin	Nontoxin	18.24	6.19	45.34	11.15	6.01	9.18	24.21	13.8	16.765	13.0903	0.78081	FALSE	894	0.2625	0	2	0	0	0	0	2	2	-0.330104		-0.330104	0.129032	0		0.368421	-0.428571	0.25	0	0.166666	0.285036
MIMO1	Nontoxin	Nontoxin	151.04	229.55	144.53	241.91	132.42	254.67	202.64	178.24	191.875	47.2257	0.246127	FALSE	234	0.325	0	2	0	0	0	0	2	2	0.200738		0.200738	0.271007	-0.333333	0.163636	0.157729	0.163636	0.157729	0.242424	0.0925925	0.0508154
mIntermemImport40	Nontoxin	Nontoxin	38.57	61.39	69	20.34	37.86	58.18	62.82	17.49	45.7063	19.9612	0.436728	FALSE	420	0.125	0	1	1	1	0	1	1	2	-1.49796	-1.16221	-1.16221	-0.105263	0	-0.428571	0.0177126		-0.0961538	-0.4	0	0.0174334
MIP18	Nontoxin	Nontoxin	53.52	26.12	24.07	43.6	43.01	96.11	71.44	69.14	53.3762	24.5118	0.459226	FALSE	483	0.30303	0	1	0	0	0	0	1	1	-0.0334055		-0.0334055					0.6	-0.0961538	1.11022e-16	0.0508475	-0.2
mIsochorismatase2	Nontoxin	Nontoxin	40.7	25.22	22.7	8.9	6.35	9.37	60.26	25.9	24.925	18.3116	0.734666	FALSE	615	0.479166	0	2	0	0	0	0	2	2	1.51015		1.51015	0.220403	-0.5	0.100478	0.742188	-1.4	0.25	0.666667	0.415789	0.371565
MitActKin6	Nontoxin	Nontoxin	47.39	145.18	85.41	64.76	100.51	87.03	166.65	44.5	92.6787	43.9576	0.474301	FALSE	2154	0.230128	0	12	1	1	0	1	12	13	-0.911624	-1.16221	-0.79193	0.0813363	-0.0714286	0.263588	0.0853165	-0.184415	0.0844148	0.048485	0.0519069	0.0625612
MitChkBub3	Nontoxin	Nontoxin	12.11	28.13	19.84	20.29	18.63	25.05	27.9	16.36	21.0388	5.64251	0.268196	FALSE	981	0.125	0	0	1	1	0	1	0	1	-1.16221	-1.16221		0	0			-0.428571	0.131579		0	-0.0640732
MitFissionReg1	Nontoxin	Nontoxin	28.71	61.05	82.75	70.75	58.67	65.56	103.3	55.31	65.7625	21.6373	0.329022	FALSE	984	0.277083	0	4	4	4	0	4	4	8	-0.290483	-0.511606	0.00745111	0.11049	0.333333	-0.142857	0.125768	0.6	0.273994	-0.0669996	0.156987	0.260637
MitoCarrier2	Nontoxin	Nontoxin	23.47	39.3	25.95	25.16	30.51	34.05	41.9	22.9	30.405	7.33221	0.241152	FALSE	906	0.179167	0	3	1	1	0	1	3	4	-1.26856	-0.448318	-1.34917	0.10385	0.0416668	-0.214285	0.237573	-0.428571	0.131579		0.0833335	-0.00406455
Mitofusin1	Nontoxin	Nontoxin	8.8	10.37	19.04	10.75	19.08	13.3	20.92	14.15	14.5512	4.59744	0.315948	FALSE	2229	0.200833	0	7	3	3	0	3	7	10	-1.24414	-1.69654	-0.795437	0.149606	0.233333	-0.0514284	0.186026	0.390476	0.051387	0.0962963	0.033889	0.0814778
MitogenActKinKin1	Nontoxin	Nontoxin	27.95	42.6	24.01	30.61	28.54	39.01	42.29	32.04	33.3813	7.03328	0.210696	FALSE	1188	0.313186	0	2	0	0	0	0	2	2	0.0750695		0.0750695	0.305156			-0.2	1	0.0381301	0.333334	0.134595	0.0042865
MitogenKinScaff1	Nontoxin	Nontoxin	9.9	19.99	23.18	17.85	9.02	22.08	20.48	15.5	17.25	5.36673	0.311115	FALSE	375	0.5	0	1	0	0	0	0	1	1	1.30896		1.30896	0.643963		0.6	0.75431	0.6	0.75431	1.11022e-16	0.722222	0.671425
mMalateDH	Nontoxin	Nontoxin	114.97	156.05	152.45	130.75	103.67	127.81	159.27	133.74	134.839	19.9662	0.148075	FALSE	1017	0.310416	0	4	0	0	0	0	4	4	0.0939606		0.0939606	-0.097654	0	0.514285	-0.0049734	-0.663158	-0.115288	-0.145454	-0.0210084	-0.0227784
mMethylmalonicAciduriaD	Nontoxin	Nontoxin	16.31	13.45	33.94	18.72	22.99	18.28	30.21	14.57	21.0587	7.45597	0.354056	FALSE	897	0.25	0	5	3	3	0	3	5	8	-0.614475	-1.0018	-0.215413	0.0213711	0	0.0857145	0.215406	-0.324675	0.111735	-0.368889	0.143114	0.17538
MOBKinAct-1B-2	Nontoxin	Nontoxin	13.02	33.92	16.08	16.47	17.58	13.01	26.27	23.33	19.96	7.32334	0.366901	FALSE	651	0.265741	0	9	0	0	0	0	9	9	-0.434155		-0.434155	-0.0686189	0.0285714	-0.515151	0.0517639	-0.326407	-0.0660498	-0.0886446	-0.0643738	0.0245077
MolybopterinSyn	Nontoxin	Nontoxin	32.93	44.59	31.08	30.36	21.75	43.79	36.4	53.49	36.7987	10.028	0.27251	FALSE	468	0.233333	0	0	1	1	0	1	0	1	-0.448318	-0.448318		-0.210526	0	-0.428571	-0.231214		-0.0961538	-0.4	-0.142857	-0.128487
Mortal4	Nontoxin	Nontoxin	60.11	112.06	70.91	84.13	68.78	80.14	96.71	79.6	81.555	16.5144	0.202495	FALSE	1035	0.168333	0	5	0	0	0	0	5	5	-1.45474		-1.45474	0.0932924	0	0.6	-0.0961538	0.0857145	-0.186194	0.0266668	-0.0571428	-0.0572361
MotileSperm1	Nontoxin	Nontoxin	18.77	43.95	32.36	26.18	30.23	30.94	32	15.02	28.6812	8.91469	0.310819	FALSE	648	0.291666	0	2	0	0	0	0	2	2	-0.0823774		-0.0823774	0.283087	0.666667	1	-0.0961538	-0.428571	0.323017	0.3	-0.119048	0.194108
mOxoisovalerateDH-b	Nontoxin	Nontoxin	38.85	45.41	42.39	58.02	27.28	33.33	47.15	53.54	43.2462	10.1239	0.2341	FALSE	1116	0.203296	0	1	3	3	0	3	1	4	-1.03817	-1.15395	-0.264521	-0.282829	0.0857145		-0.444444	-0.428571	-0.0894737	-1	-0.0169993	0.0332625
MPhasePP6	Nontoxin	Nontoxin	27.86	84.71	56.43	60.47	53.5	85.39	64.13	53.12	60.7013	18.5314	0.305289	FALSE	498	0.152083	0	3	1	1	0	1	3	4	-1.54972	-1.16221	-1.34917	0.167789	0	-0.085714	0.145191	0.6	0.172414	0.333334	0.0416668	0.0389016
mpsOneBinderKin3	Nontoxin	Nontoxin	32.66	57	48.63	40.22	29.77	41.06	51.93	37.38	42.3312	9.47846	0.223912	FALSE	678	0.125	0	1	0	0	0	0	1	1	-1.16221		-1.16221	-0.210526			-0.0961538		-0.0961538	-0.4	0	0.0989399
mRNAExport	Nontoxin	Nontoxin	10.3	26.51	16.71	11.31	8.32	13.18	12.32	17.65	14.5375	5.75126	0.395615	FALSE	1107	0.161111	0	2	1	1	0	1	2	3	-1.34917	-1.16221	-1.03789	-0.210526	0	-0.428571	-0.141174		-0.0961538	-0.4	-0.047619	0.0231309
mRNATurnover4	Nontoxin	Nontoxin	20.68	41.13	49.41	17.38	29.16	33.91	48.27	25.39	33.1662	12.1749	0.367086	FALSE	735	0.190833	0	6	4	4	0	4	6	10	-1.36789	-1.54972	-0.962019	0.0694376	0.1	0.120779	0.0620141	-0.0514284	0.123707	0.057143	0.0320513	0.0879338
mRp63	Nontoxin	Nontoxin	43.12	49.64	49.34	35.22	22.47	49.24	56.26	44.2	43.6863	10.5475	0.241437	FALSE	315	0.247917	0	2	2	2	0	2	2	4	-0.554861	-1.03789	0.129959	0.0844045	0	0.077922	0.146727	-0.085714	0.0242597	0.088889	0.0251833	0.0694053
mRpL10	Nontoxin	Nontoxin	29.91	32.17	52.29	12.76	22.52	16.27	54.77	28.7	31.1738	15.3412	0.492119	FALSE	753	0.2625	0	3	1	1	0	1	3	4	-0.403469	-1.16221	0.067026	0.0443551	0	-0.085714	-0.178571	0.6	0.104003	-0.0102562	-0.0128205	0.115903
mRpL13	Nontoxin	Nontoxin	54.44	65.12	55.81	48.86	25.02	46.58	79.62	60.8	54.5313	15.806	0.289852	FALSE	540	0.197222	0	1	2	2	0	2	1	3	-1.0018	-1.03789	-0.448318	0.223719	0	0.0666667	0.0769231	0.6	-0.0961538	0.333334	0.0555557	-0.108212
mRpL14	Nontoxin	Nontoxin	24.62	77.85	51.47	53.34	20.28	48.66	44.58	33.72	44.315	18.3382	0.413814	FALSE	438	0.125	0	0	1	1	0	1	0	1	-1.16221	-1.16221		0.54902		0.6		0.6		0.666667	0	-0.0640732
mRpL15	Nontoxin	Nontoxin	18.01	33.2	21.34	20.55	22.85	18.36	33.4	28.85	24.57	6.34613	0.258288	FALSE	894	0.179167	0	1	1	1	0	1	1	2	-1.03789	-0.448318	-1.16221	-0.152882	-0.333333	-0.428571	0.0177126	-0.428571	0.0177126	-0.4	0.0833335	0.077442
mRpL16	Nontoxin	Nontoxin	20.99	29.76	22.6	23.12	19.02	28.99	19.95	15.72	22.5187	4.8119	0.213684	FALSE	759	0.229166	0	1	3	3	0	3	1	4	-0.749507	-1.0018	0.155746	0.204515	0.333333	-0.428571	0.0692797	0.428571	0.288052	-0.2	0.0666668	0.0515807
mRpL17	Nontoxin	Nontoxin	6.19	3.11	0	11.13	15.29	24.81	12.15	23.81	12.0613	9.03907	0.749431	TRUE	498	0.235714	0	3	2	2	0	2	3	5	-0.273705	-0.57783	0.129959						0.125		0.125	0.125
mRpL2	Nontoxin	Nontoxin	29.36	36.17	49.4	26.34	22.46	26.86	28	27.1	30.7113	8.47946	0.276103	FALSE	891	0.179167	0	0	2	2	0	2	0	2	-1.03789	-1.03789		-0.324013			-0.148077		-0.148077	-0.7	0	0.144064
mRpL20	Nontoxin	Nontoxin	60.43	94.94	78.49	56.71	49.04	70.9	71.13	51.07	66.5888	15.4409	0.231885	FALSE	450	0.252083	0	2	2	2	0	2	2	4	-0.511606	0.200738	-1.03789	-0.0802178	-0.166667	-1	-0.0564493	-0.428571	0.0643847	0.022222	-0.0416668	-0.00257375
mRpL23	Nontoxin	Nontoxin	40.4	71.45	57.39	32.41	30.58	52.35	75.82	58.83	52.4038	16.8919	0.322342	FALSE	459	0.341667	0	2	1	1	0	1	2	3	0.387675	0.649981	0.0945699	0.119236	-0.166666	0.736842	-0.188106	0.348371	-0.081544	0.222222	0.111111	-0.172988
mRpL3	Nontoxin	Nontoxin	41.82	69.39	87.7	25.27	55.4	32.89	109.34	55.28	59.6363	28.2942	0.474446	FALSE	1065	0.253333	0	1	4	4	0	4	1	5	-0.525245	-0.684625	0.155746	0.0370314	-0.25	-0.428571	0.173395	-1	0.2124	-0.0444443	0.151111	0.194415
mRpL32	Nontoxin	Nontoxin	47.43	107.71	48.46	27.45	47.96	25.49	115.62	59.35	59.9338	33.926	0.566058	FALSE	534	0.28	0	2	3	3	0	3	2	5	-0.233638	-1.05524	0.943917	0.162929	0	0.4	0.352679	-0.27619	0.11446	-0.290909	0.266667	0.13381
mRpL33	Nontoxin	Nontoxin	62.76	82.96	100.04	43.54	40.7	64.05	113.9	103.99	76.4925	27.9339	0.365185	FALSE
mRpL38	Nontoxin	Nontoxin	14.97	26.99	33.94	22.6	15.66	20.89	24.18	21.13	22.545	6.11562	0.271263	FALSE	1143	0.26	0	5	0	0	0	0	5	5	-0.452344		-0.452344	-0.201677	-0.25	-0.714286	-0.217571	0.428571	-0.0866347	-0.350769	-0.0179488	0.00756
mRpL39	Nontoxin	Nontoxin	20.61	34.02	49.66	27.37	21.75	29.91	25.42	24.55	29.1613	9.34181	0.32035	FALSE	1008	0.288333	0	3	2	2	0	2	3	5	-0.142511	-1.03789	0.57472	0.0762258	-0.0416665	0.266986	-0.513393	0.160191	-0.0849127	-0.148148	-0.0119047	-0.104861
mRpL42	Nontoxin	Nontoxin	132.4	202.19	127.83	136.27	109.99	95.58	250.93	155.52	151.339	51.3794	0.339499	FALSE	423	0.386111	0	2	1	1	0	1	2	3	0.815206	1.30896	0.236128	0.458656	0	0.514285	0.445248	-0.085714	0.396601	0.666667	0.0928794	0.327332
mRpL48	Nontoxin	Nontoxin	8.55	17.61	9.95	18.68	8.9	17.56	24.27	17.32	15.355	5.62558	0.366368	FALSE	645	0.236905	0	4	3	3	0	3	4	7	-0.753679	-1.69654	0.202097	-0.0629093	-0.1	-0.584962	-0.123027	-0.175324	0.0607944	-0.0787878	-0.0250234	0.0133545
mRpL50	Nontoxin	Nontoxin	16.39	34.66	34.29	25.82	29.33	35.33	36.76	31.76	30.5425	6.74137	0.220721	FALSE	459	0.152083	0	1	3	3	0	3	1	4	-1.54972	-1.34917	-1.16221	-0.162006	0	-0.428571	-0.0548583	-0.428571	-0.0548583	-0.7	0	0.0399956
mRpL55	Nontoxin	Nontoxin	75.87	67.01	136.2	40.88	80.9	37.03	93.99	123.65	81.9412	35.4416	0.432524	FALSE	384	0.308333	0	2	1	1	0	1	2	3	0.067026	1.03439	-0.57783	0.77451	0	0.824561	-0.176211	1	0.172414	0.814815	0.0555557	-0.154586
mRpS17	Nontoxin	Nontoxin	149.06	181.18	144.07	84.02	78.46	74.31	137.77	259.66	138.566	62.493	0.450997	FALSE
mRpS18a	Nontoxin	Nontoxin	20.69	35.43	29.44	27.13	23.83	19.46	50.92	32.97	29.9837	10.1442	0.338324	FALSE	579	0.261111	0	3	0	0	0	0	3	3	-0.387226		-0.387226	0.164446	0	-0.350649	0.259204	0.6	0.451923	0.133333	0.226667	0.255492
mRpS21	Nontoxin	Nontoxin	539.32	179.48	140.91	313.91	203.45	422.55	327.66	412.98	317.533	137.692	0.43363	TRUE	264	0.125	0	1	0	0	0	0	1	1	-1.16221		-1.16221	0.54902		0.6		0.6		0.666667	0	-0.0640732
mRpS29	Nontoxin	Nontoxin	33.71	32.89	35.28	33.5	28.63	21.53	36.73	31.11	31.6725	4.78105	0.150953	FALSE	1185	0.267361	0	5	7	7	0	7	5	12	-0.431027	-1.15733	0.622958	0.0963614	-0.0583333	0.177068	0.0741547	-0.035844	0.0805025	0.116667	0.0803573	0.0369333
mRpS31	Nontoxin	Nontoxin	20.23	34.46	31.31	26.25	21.86	23.95	30.44	31.32	27.4775	5.14111	0.187103	FALSE	1074	0.308333	0	5	2	2	0	2	5	7	0.0814674	1.93482	-0.889754	-0.121359	-0.166667	-0.175324	-0.0549228	-0.531428	-0.0113624	-0.119192	-0.0131868	0.0343462
mRpS34	Nontoxin	Nontoxin	2.89	15.66	18.33	8.78	13.53	9.7	14.18	10.21	11.66	4.80309	0.411929	FALSE	639	0.243333	0	2	3	3	0	3	2	5	-0.634598	-1.34917	0.554633	0.263525	0.25	0.390476	0.345142	0.194805	0.286634	0.133333	0.149206	0.120122
mRpS5	Nontoxin	Nontoxin	14.34	23.24	34.07	18.36	16.61	19.34	27.24	26.92	22.515	6.59889	0.293089	FALSE	1221	0.179167	0	2	0	0	0	0	2	2	-1.03789		-1.03789	0.0610685	0	0.6	-0.0961538	0.0857145	0.0177126	1.11022e-16	0.0833335	-0.0962801
mRpS6	Nontoxin	Nontoxin	28.04	24.44	44.79	23.92	19.26	23.44	50.36	27.48	30.2162	11.1442	0.368815	FALSE
mRpS7	Nontoxin	Nontoxin	26.33	39.82	45.43	29.5	26.32	24.35	48.11	45.13	35.6238	9.98268	0.280225	FALSE	723	0.388889	0	2	1	1	0	1	2	3	0.841927	-0.448318	1.40398	0.104555	-0.222222	-0.324675	0.21992	-0.233766	0.361245	0.333334	0.192308	0.246838
mRpS9	Nontoxin	Nontoxin	19.38	40.97	33.07	23.91	20.15	28.14	43.98	31.5	30.1375	9.08421	0.301425	FALSE	1149	0.221667	0	2	3	3	0	3	2	5	-0.871529	-1.34917	0.0945699	0.00514493	-0.166666	0.257143	0.0769231	-0.033766	-0.0350866	-0.311111	0.0929826	0.0834889
mSCO1	Nontoxin	Nontoxin	23.2	27.6	26.26	28.93	18.25	27.55	41.97	19.24	26.625	7.35945	0.276411	FALSE	783	0.2625	0	3	1	1	0	1	3	4	-0.403469	-1.16221	0.067026	0.12747	0.25	0.6	0.123017	-0.214285	0.183243	0.0148147	0.076389	0.169222
mSulfideQuinoneOxidoreductase	Nontoxin	Nontoxin	5.58	33.89	12.32	13.63	6.71	11.89	14.64	11.32	13.7475	8.73536	0.635415	FALSE	1353	0.275	0	9	2	2	0	2	9	11	-0.330532	-1.49796	0.0849151	0.18589	-0.208333	0.3	0.305064	-0.27619	0.245719	0.152992	0.150505	0.247355
mTIM21	Nontoxin	Nontoxin	19.58	27.57	27.13	16.91	9.98	20.59	21.31	16.22	19.9112	5.78861	0.290721	FALSE	732	0.296666	0	3	7	7	0	7	3	10	-0.0581514	-0.0438046	-0.0665776	-0.114235	-0.333333	-0.542857	-0.19869	-0.0512057	-0.0699982	-0.328395	0.00575171	0.0186042
mTranslocase-Tim17B	Nontoxin	Nontoxin	27.64	103.58	49.94	59.54	23.02	53.16	59.65	103.21	59.9675	30.0697	0.501434	FALSE	519	0.125	0	3	0	0	0	0	3	3	-1.69654		-1.69654	0.042656		0.6	-0.0961538	0.6	-0.0961538	-0.0444443	0	0.0446022
MTSG1346aa	Nontoxin	Nontoxin	11.43	23.53	22.33	16.83	15.87	18.91	17.52	19.78	18.275	3.81767	0.208901	FALSE	1044	0.31875	0	3	1	1	0	1	3	4	0.18047	-1.16221	0.788486	0.0566982	0.0555557	0.473684	0.222956	0.157895	0.0272081	-0.266667	0.107955	0.112794
Multivesicular-2b	Nontoxin	Nontoxin	21.38	34.35	37.54	19.35	14.84	28.74	38.73	22.68	27.2013	8.96059	0.329418	FALSE	645	0.125	0	1	0	0	0	0	1	1	-1.16221		-1.16221	-0.210526			-0.0961538		-0.0961538	-0.4	0	0.0989399
MultivesicularBody-3	Nontoxin	Nontoxin	42.24	64.12	66.24	26.99	34.99	22.69	49.46	50.06	44.5988	15.9948	0.358638	FALSE
MultivesicularBody1b-1	Nontoxin	Nontoxin	59.44	162.29	86.98	79.24	83.92	98.28	136.57	72.09	97.3513	34.7386	0.356838	FALSE	600	0.225	0	2	0	0	0	0	2	2	-0.648609		-0.648609	-0.170837	-0.5	-0.428571	0.0177126	-1	0.0769231	-0.4	0.111111	0.0766049
MultivesicularBody6	Nontoxin	Nontoxin	18.77	63.62	30.28	34.77	25.32	52.08	38.38	29.4	36.5775	14.7025	0.401956	FALSE	603	0.245833	0	2	2	2	0	2	2	4	-0.576488	-1.03789	0.0945699	0.166038	0	0.257143	0.224138	0.163636	0.0463981	-0.148148	0.116228	0.111843
mUniquinone8	Nontoxin	Nontoxin	25.19	37.5	30.09	33.98	21.62	20.32	37.34	19.32	28.17	7.5622	0.268449	FALSE	627	0.252778	0	0	3	3	0	3	0	3	-0.467388	-0.467388		0.154377	0	-0.233766	0.272905	0.163636	0.131579	0.666667	-0.021978	0.100599
myeAscMark	Nontoxin	Nontoxin	7.36	26.57	12.54	5.59	9.7	5.16	9.95	16.62	11.6863	7.09154	0.606827	FALSE	906	0.236111	0	3	0	0	0	0	3	3	-0.627713		-0.627713	0.014688		0.6	0.123017	0.6	0.123017	-0.327273	0.2	0.226719
MyeLeuk2	Nontoxin	Nontoxin	14.76	36.27	22.92	24.8	22.14	31.39	29.99	23.4	25.7088	6.64068	0.258304	FALSE	732	0.191667	0	2	1	1	0	1	2	3	-1.05524	-1.16221	-0.648609	-0.0386793	0	-0.428571	0.0798357		0.0539641	-0.276923	0.074074	0.169237
MyoEF2c1b	Nontoxin	Nontoxin	9.65	59.83	9.43	9.4	4.92	8.98	5.24	20	15.9313	18.3299	1.15056	FALSE	1398	0.095238	0	2	1	1	0	1	2	3	-1.35784	-1.0535	-1.0535	-0.0985915	0		0	-0.428571	0	-0.428571	0.0061623	0.067741
Myosin7	Nontoxin	Nontoxin	261.8	1466.41	79.8	136.89	11.85	63.99	28.19	339.62	298.569	485.685	1.62671	FALSE	5844	0.374145	0	39	0	0	0	0	39	39	1.01256		1.01256	0.0925593	-0.0427083	-0.438829	0.155224	0.0735148	0.193924	-0.00932389	0.116964	0.185978
MyosinId	Nontoxin	Nontoxin	18	24.89	29.45	14.52	22.28	16.75	44.4	13.76	23.0062	10.177	0.442359	FALSE	3021	0.208333	0	2	3	3	0	3	2	5	-1.01733	-1.34917	-0.188546	0.163612	0.166667	0.0428572	0.232708	0.6	0.172414	-0.090909	0.133333	0.0683054
MyosinLight	Nontoxin	Nontoxin	3028.48	17969.3	1323.67	2539.22	181.58	755.62	483.55	1310.33	3448.97	5948.09	1.7246	TRUE	519	0.2625	0	0	2	2	0	2	0	2	-0.330104	-0.330104		0.5	0.5	1	1	-0.428571	0.131579		0.166666	0.0267869
MyosinLight6	Nontoxin	Nontoxin	118.48	115.06	25	165.76	180.08	35.22	330.63	146.58	139.601	95.574	0.684622	FALSE	456	0.2625	0	2	0	0	0	0	2	2	-0.330104		-0.330104	-0.278565	-0.5	-1	-0.126817	-0.428571	-0.163684	-0.4	-0.0128205	-0.0404175
MyosinLight6_2	Nontoxin	Nontoxin	98.65	150.16	329.76	130.68	1.63	200.14	4.43	155.95	133.925	106.241	0.793288	FALSE
MyosinLight9	Nontoxin	Nontoxin	4.36	4.1	3.08	3.18	4.09	7.59	12.06	21.93	7.54875	6.54931	0.867602	FALSE	519	0.142857	0	1	0	0	0	0	1	1	-1.0535		-1.0535	0.552632		0.6				0.666667	-0.044586	-0.044586
MyosinRegLight2	Nontoxin	Nontoxin	139.18	438.9	309.49	248.15	132.47	137.78	296.35	311.78	251.763	109.449	0.434731	FALSE	519	0.4	0	1	0	0	0	0	1	1	0.649981		0.649981	-0.210526	-0.333333	-0.272727	-0.231214	-0.272727	-0.231214	1.11022e-16	-0.111111	-0.0620757
Myotrophin	Nontoxin	Nontoxin	28.94	51.55	40.46	21.29	36.88	49.37	63.78	34.06	40.7912	13.624	0.333994	FALSE	357	0.316667	0	2	0	0	0	0	2	2	0.129959		0.129959	0.114249	0.1	0.473684	0.323017	-0.428571	-0.0498175	-0.4	0.136905	0.042943
N-LysMethyltransferase-SMYD2	Nontoxin	Nontoxin	20.48	33.72	49.04	53.22	17.55	38.31	41.05	39.53	36.6125	12.4977	0.341349	FALSE	1311	0.417582	0	3	0	0	0	0	3	3	1.07969		1.07969	0.498262			0.148718	1	0.369309	0.25641	0.432333	0.24367
Na-K-TransportingATPase-b3	Nontoxin	Nontoxin	15.78	18.39	17.78	26.46	9.55	11.51	38.06	38.63	22.02	11.269	0.511764	FALSE	846	0.125	0	2	1	1	0	1	2	3	-1.69654	-1.16221	-1.49796	-0.0701753	0		-0.0961538	-0.428571	0.0556681	-0.4	0	-0.0097355
NaAT-NatB	Nontoxin	Nontoxin	42.89	53.41	43.96	58.33	39.3	63.47	36.82	72.34	51.315	12.6657	0.246822	FALSE	537	0.327778	0	2	1	1	0	1	2	3	0.254071	-1.16221	1.08547	-0.0383133	-1	-1	0.102575	-1	0.102575	-0.118519	0.166667	0.218134
NAATran3	Nontoxin	Nontoxin	18.95	13.29	15.66	26.18	14.02	22.5	28	30.69	21.1612	6.68317	0.315821	FALSE	1716	0.253125	0	5	3	3	0	3	5	8	-0.577092	-0.280343	-0.652823	-0.0846491	-0.233333	-0.771428	-0.0129181	-0.225974	0.0489244	-0.16	0.0515874	0.0757798
NAB	Nontoxin	Nontoxin	85.6	210.74	225.13	210.89	140.91	262.07	350.11	250.31	216.97	79.3342	0.365646	FALSE	516	0.5	0	1	0	0	0	0	1	1	1.30896		1.30896	0.682028	0.666667	0.6	1	-0.272727	0.131579	0.666667	0.298246	0.453853
NaClATB0	Nontoxin	Nontoxin	14.28	40.36	12.28	24.38	19.01	8.39	3.56	13.56	16.9775	11.3419	0.668053	FALSE	1914	0.286813	0	9	1	1	0	1	9	10	0.174037		0.174037	0.1015	0.0714286	0.1	0.194444	-0.38355	0.0952381	0.166826	0.00163803	0.0553324
NADH-DH1a-7	Nontoxin	Nontoxin	33.24	44.96	7.29	49.22	36.82	53.96	55.82	41.79	40.3875	15.5036	0.38387	FALSE	348	0.301667	0	3	2	2	0	2	3	5	0.00329248	-0.330104	0.254071	0.090867	-0.333333	-0.52	-0.15748	0.36	-0.0637269	0.106667	-0.0162392	-0.107496
NADHDehydro-1a1	Nontoxin	Nontoxin	322.18	513.32	439.06	312.68	215.11	420.93	260.34	347.96	353.947	98.5006	0.278292	FALSE
NADHDehydro-1a10	Nontoxin	Nontoxin	50.86	66.43	57.9	67.08	58.51	56.4	40.19	58.84	57.0262	8.59931	0.150796	FALSE	1059	0.313187	0	2	2	2	0	2	2	4	0.0917537	0.259961	-0.109822	0.362826	0.433333	0.257143	0.333334	0.266986	0.222222	0.442857	-0.058418	0.161479
NADHDehydro-1a11	Nontoxin	Nontoxin	120.03	133.34	109.18	100.9	42.41	117.54	130.3	99.54	106.655	28.7504	0.269564	FALSE	411	0.125	0	1	0	0	0	0	1	1	-1.16221		-1.16221	-0.210526			-0.0961538		-0.0961538	-0.4	0	0.0989399
NADHDehydro-1a12	Nontoxin	Nontoxin	248.48	272.45	579.7	391.48	231.82	412.21	376.39	357.31	358.73	112.618	0.313935	FALSE	441	0.191667	0	3	2	2	0	2	3	5	-1.19959	-1.49796	-0.627713	0.237525	0	0.557895	0.183293	0.542857	0.121083	0.133333	0.12	0.0873959
NADHDehydro-1a13	Nontoxin	Nontoxin	226.01	115.47	153.47	103.14	96.2	169.49	177.99	176.16	152.241	44.5287	0.292488	FALSE	441	0.425	0	2	0	0	0	0	2	2	1.05009		1.05009	0.12553	0.1	0.077922	0.356642	-0.350649	-0.022316	-0.181818	0.125	0.0589828
NADHDehydro-1a3	Nontoxin	Nontoxin	262.19	256.41	337.16	83.08	127.96	94.44	383.05	423.03	245.915	132.152	0.53739	TRUE	258	0.125	0	1	0	0	0	0	1	1	-1.16221		-1.16221	0.54902		0.6		0.6		0.666667	0	-0.0640732
NADHDehydro-1a5	Nontoxin	Nontoxin	172.82	179.09	201.91	89.75	74.37	108.23	143.96	233.9	150.504	56.3535	0.374432	FALSE	351	0.319444	0	1	2	2	0	2	1	3	0.173909	0.519243	-0.448318	-0.0526189	0	-0.636363	-0.0932413	0.6	0.002041	-0.162393	-0.084656	0.0765247
NADHDehydro-1a9	Nontoxin	Nontoxin	57.27	79.59	88.48	79.98	63.02	103.14	124.39	65.32	82.6488	22.4956	0.272183	FALSE	1137	0.257292	0	5	3	3	0	3	5	8	-0.527247	-1.69654	0.386027	0.0948223	0	-0.127819	0.137412	1	0.235628	-0.151567	0.176854	0.257377
NADHDehydro-1b1	Nontoxin	Nontoxin	451.05	326.44	615.35	286.47	124.2	164.56	429.32	311.25	338.58	159.166	0.470098	FALSE
NADHDehydro-1b3	Nontoxin	Nontoxin	394.28	364.38	481.55	211.19	214.95	210.11	293.95	233.36	300.471	102.588	0.341425	FALSE
NADHDehydro-1b5	Nontoxin	Nontoxin	92.25	68.89	89.23	111.76	57.21	48.31	105.24	112.39	85.66	24.845	0.290042	FALSE	570	0.171717	0	5	1	1	0	1	5	6	-0.514009	-0.912045	-0.191274					0.215038	-0.0147309	-0.244444	0.0262413	-0.0833333
NADHDehydro-1b6	Nontoxin	Nontoxin	61.38	62.36	54.03	108.7	56.78	122.45	99.79	80.56	80.7562	26.4158	0.327105	FALSE	465	0.399267	0	0	3	3	0	3	0	3	0.905184	0.905184		-0.344775	-1		-0.2	-1.53333	-0.0768913	-0.090909	-0.115617	-0.145342
NADHDehydro-1b9	Nontoxin	Nontoxin	147.79	135.19	173.93	145.2	86.92	114.13	122.28	166.54	136.498	28.4582	0.208489	FALSE	525	0.3125	0	3	1	1	0	1	3	4	0.115588	0.155746	0.067026	0.258709	0		0.343574	-0.428571	0.243524	0.211111	0.206731	0.421098
NADHDehydro-1C2	Nontoxin	Nontoxin	46.67	33.25	23.75	124.26	57.78	61.85	48.13	43.4	54.8863	30.5947	0.557421	FALSE	342	0.333333	0	1	2	2	0	2	1	3	0.236257	0.900663	-0.912045					0.473684	-0.125257	-0.8	-0.0818313	-0.111111
NADHDehydro1-C2	Nontoxin	Nontoxin	75.21	56.26	39.14	118.46	115.95	94.67	114.86	161.52	97.0087	39.2596	0.404701	FALSE	342	0.234848	0	4	0	0	0	0	4	4	-0.744701		-0.744701					0.2	0.286516	0.333334	0.184537	0.125
NADHDehydro2	Nontoxin	Nontoxin	69.16	99.06	93.37	87.26	72.18	78.49	117.9	101.01	89.8038	16.4082	0.182712	FALSE	738	0.403333	0	5	0	0	0	0	5	5	1.11504		1.11504	0.276614	0	0.8	0.581703	-0.757576	0.281442	0.0282053	0.33802	0.363995
NADHDehydro5	Nontoxin	Nontoxin	184.2	224.44	110.98	215.02	161.79	180.61	177.25	263.45	189.718	45.5611	0.240152	FALSE	303	0.305555	0	6	0	0	0	0	6	6	0.0475902		0.0475902	0.3395	0	0.218045	0.137882	0.857143	0.415871	0.148718	0.24812	0.0811305
NADHDehydroFeS7	Nontoxin	Nontoxin	170.7	232.62	98.1	218.32	83.69	147.29	125.49	146.5	152.839	52.8727	0.345938	FALSE	654	0.3375	0	5	3	3	0	3	5	8	0.432268	0.414395	0.349576	0.127494	-0.166667	-0.314285	0.120582	0.536842	0.167096	-0.0116162	0.153869	0.257751
NADHDehydroFlavoprotein	Nontoxin	Nontoxin	33.16	79.86	42.66	63.97	48.34	60.98	60.05	49.81	54.8538	14.4426	0.263293	FALSE	1401	0.202083	0	2	2	2	0	2	2	4	-1.03066	-0.648609	-1.03789	-0.0589415	0	-0.085714	-0.0058437	0.6	-0.0066312	-0.327273	0.047619	-0.00692922
NADHOxidoRed75	Nontoxin	Nontoxin	40.98	52.34	37.81	46.54	71.46	42.43	76.73	60.06	53.5438	14.5429	0.271608	FALSE	2187	0.168333	0	3	2	2	0	2	3	5	-1.45474	-0.57783	-1.69654	-0.0802004	-0.166666	-0.428571	0.0746458	-0.428571	0.0746458	-0.4	0.0666668	0.0165363
NADPHP450	Nontoxin	Nontoxin	10.11	18.43	21.58	49.62	10.43	16.12	27.22	29.32	22.8537	12.8763	0.563423	FALSE	2046	0.241667	0	15	2	2	0	2	15	17	-0.785608	-0.0823774	-0.862665	0.17497	-0.0452381	0.00719582	0.106127	0.202757	0.0831203	0.413333	-0.0198047	0.034364
NAG1PT-g	Nontoxin	Nontoxin	77.1	86.61	64.32	77.31	63.28	49.51	118.9	129.43	83.3075	27.7319	0.332886	FALSE	864	0.2875	0	0	4	4	0	4	0	4	-0.143941	-0.143941		0.202057	0	0.485714	0.140603	0.485714	0.140603	0.088889	0.145833	0.0711964
NaKTransATPase-a1	Nontoxin	Nontoxin	330.92	649.03	543.1	549.65	329.88	482.01	508.69	385.28	472.32	114.325	0.242051	FALSE	3069	0.265277	0	6	0	0	0	0	6	6	-0.409889		-0.409889	0.0543962	-0.111111	-0.350649	0.136526	-0.350649	0.158211	-0.08	0.11508	0.20426
NaKTransportingATPase-b1	Nontoxin	Nontoxin	39.32	109.92	70.27	46.73	40.17	63.97	69.68	57.86	62.24	22.8922	0.367805	FALSE	915	0.125	0	1	0	0	0	0	1	1	-1.16221		-1.16221	0	0			-0.428571	0.131579		0	-0.0640732
Nascent-a	Nontoxin	Nontoxin	473.88	587.58	641.86	543.23	237.75	416.07	1037.81	1121.45	632.454	302.667	0.47856	FALSE	648	0.20625	0	4	0	0	0	0	4	4	-0.987408		-0.987408	0.075028	0.166667	0.428571	0.229701	-1	0.134615	-0.4	0.0416668	-0.0273165
Nat13	Nontoxin	Nontoxin	42.48	87.25	107.43	63.46	82.32	71.09	110.04	75.88	79.9937	22.3301	0.279148	FALSE	393	0.5	0	1	0	0	0	0	1	1	1.30896		1.30896	0.792793	0.5	1	1	0.428571	0.555556		0.722222	0.453853
NatA-10	Nontoxin	Nontoxin	100.12	178.8	138.63	187.57	75.15	136.52	223.33	346.97	173.386	84.8878	0.489588	FALSE	723	0.291666	0	2	0	0	0	0	2	2	-0.0823774		-0.0823774	-0.270552	-0.5	-1.8	-0.126817	-0.272727	-0.163684	-0.2	-0.0714285	0.024577
NatC	Nontoxin	Nontoxin	36.29	52.81	52.1	29.08	38.99	49.56	61.86	44.4	45.6362	10.5493	0.23116	FALSE
NaTransporter1	Nontoxin	Nontoxin	55.59	59.02	61.89	66.94	63.3	61.58	79.15	40.31	60.9725	10.9047	0.178846	FALSE	1797	0.239394	0	5	0	0	0	0	5	5	-0.73585		-0.73585					0.473684	-0.0453772	-0.32	-0.0409458	-0.0333334
NatResMac2	Nontoxin	Nontoxin	21.8	68.6	58.45	31.68	26.07	37.84	73.36	20.24	42.255	21.4483	0.507592	FALSE	1662	0.249074	0	9	0	0	0	0	9	9	-0.63727		-0.63727	-0.0652778	-0.1	0.0541355	0.129105	-0.314285	-0.0415211	-0.433333	0.0907407	0.0993755
NCK2	Nontoxin	Nontoxin	9.05	23.23	10.36	13.98	12.28	12.69	15.97	10.26	13.4775	4.5246	0.335715	FALSE	1143	0.191667	0	2	1	1	0	1	2	3	-1.05524	-1.16221	-0.648609	0.0314961	0		0.204082	-0.428571	0.155747	-0.153846	0.074074	0.114899
NDRG2	Nontoxin	Nontoxin	258.64	428.73	303.72	291.09	297.99	269	683.44	364.34	362.119	141.238	0.390031	FALSE	1071	0.2625	0	2	0	0	0	0	2	2	-0.330104		-0.330104	0.326458	-0.5	0.514285	0.555556	-0.2	0.25	0.666667	0.208334	0.0751499
NDUFV3	Nontoxin	Nontoxin	106.85	107.44	127.64	65.77	71.05	41.41	90.74	145.03	94.4912	34.1833	0.361762	FALSE	306	0.125	0	0	2	2	0	2	0	2	-1.49796	-1.49796		-0.105263	0		-0.0961538	-0.428571	0.0177126	-0.4	0	0.0174334
NEDD4-1	Nontoxin	Nontoxin	159.22	185.11	169.84	206.89	120.4	187.66	241.24	172.32	180.335	35.2612	0.195532	FALSE	657	0.175	0	4	0	0	0	0	4	4	-1.31182		-1.31182	-0.13805	-0.25	-0.428571	0.0177126	-1	0.0192308	-0.4	0.0555555	0.0470191
NEDD8-ubc12	Nontoxin	Nontoxin	22.6	43.82	38.28	32.38	27.92	35.7	55.09	29.04	35.6037	10.254	0.288002	FALSE	552	0.2625	0	2	0	0	0	0	2	2	-0.330104		-0.330104	0.051948	0	0.0857145	0.16783	0.6	0.204082	-0.8	0.208334	0.0751499
NEDD8E1	Nontoxin	Nontoxin	11.4	13.87	18.87	16.51	18.32	15.08	27.39	9.5	16.3675	5.49447	0.335694	FALSE	1329	0.273611	0	5	1	1	0	1	5	6	-0.315238	0.649981	-0.579922	0.318301	0.2	-0.857143	0.0746997	0.531428	0.50374	0.444445	0.0942762	0.0606561
NEF-SIL1	Nontoxin	Nontoxin	187.09	228.74	262.1	347.65	149.43	215.13	205.37	224.97	227.56	58.5683	0.257375	FALSE	1413	0.285185	0	5	4	4	0	4	5	9	-0.197188	-0.23045	-0.124286	-0.015849	0	0.215038	0.0131967	0.038961	0.0798214	-0.25641	0.0868866	0.184945
NEFAnuc	Nontoxin	Nontoxin	43.67	68.84	58.22	66.12	55.3	79.88	80.44	49.95	62.8025	13.4095	0.213519	FALSE	771	0.40625	0	2	2	2	0	2	2	4	1.08882	1.26242	0.519243	0.148835	-0.166667	0.52381	-0.007849	-1	0.033975	0.423077	-0.172222	0.137909
Neurocalcin-d	Nontoxin	Nontoxin	19.72	30.71	29.74	16.54	27.95	30.35	39.8	20	26.8513	7.6389	0.28449	FALSE	582	0.272222	0	3	0	0	0	0	3	3	-0.280343		-0.280343	0.356455	-0.25	0.5	0.555556	-0.409524	0.19079	0.833333	0.0555557	0.0570326
Neuroplastin	Nontoxin	Nontoxin	33.67	86.12	26.55	36.13	26.97	48.92	47.69	45.27	43.915	19.1857	0.436883	FALSE	849	0.240741	0	5	1	1	0	1	5	6	0.470277		0.470277						0.0604118		0.0604118	0.0604118
NeutAAB0	Nontoxin	Nontoxin	35.85	84.02	9.07	24.57	40.02	41.42	36.36	25.91	37.1525	21.708	0.584294	FALSE	1611	0.31579	0	18	1	1	0	1	18	19	1.69241	0.649981	1.71567
Nexin1	Nontoxin	Nontoxin	47.55	162.8	67.02	121.88	93.57	117.23	99.78	51.18	95.1262	39.2663	0.412781	FALSE	1545	0.274359	0	8	5	5	0	5	8	13	-0.345603	0.276674	-0.714165	0.252444	0.0555557	0.318797	0.161357	0.461654	0.0897658	0.215727	0.101019	0.021416
Nexin10	Nontoxin	Nontoxin	15.14	23.87	19.72	6.54	9.33	7.39	26.94	21.64	16.3212	7.88575	0.483158	FALSE	606	0.125	0	1	1	1	0	1	1	2	-1.49796	-1.16221	-1.16221	-0.105263	0	-0.428571	0.0177126		-0.0961538	-0.4	0	0.0174334
Nexin12	Nontoxin	Nontoxin	39.79	69.82	34.42	70.64	53.97	86.6	54.83	45.22	56.9112	17.6684	0.310455	FALSE	489	0.362637	0	1	0	0	0	0	1	1	0.381009		0.381009	-0.184709	-0.428571		-0.4	-0.272727	-0.231214	1.11022e-16	-0.122807	-0.122807
Nexin2	Nontoxin	Nontoxin	33.27	44.07	52.88	43.45	27.63	34.87	65.32	49.88	43.9213	12.1579	0.276811	FALSE	1560	0.228333	0	4	1	1	0	1	4	5	-0.798627	-1.16221	-0.489978	0.0406444	-0.0666665	-0.085714	0.0242501	0.215038	-0.0592349	0.0777778	0	0.0357264
Nexin3	Nontoxin	Nontoxin	6.37	24.34	10.12	14.43	12.37	18.39	19.43	17.43	15.36	5.71656	0.372172	FALSE
Nexin6	Nontoxin	Nontoxin	19.5	31.77	26.11	24.98	15.63	14.82	35.05	28.05	24.4888	7.33834	0.299662	FALSE	1221	0.235	0	4	1	1	0	1	4	5	-0.725725	-1.16221	-0.403469	0.0810666	0.1	-0.033766	0.0486529	0.163636	0.180574	0.0666668	0.1	0.12429
Nexin8	Nontoxin	Nontoxin	32.13	54.51	36.98	34.88	35.86	41.27	60.97	38.97	41.9463	10.2613	0.24463	FALSE	1335	0.228846	0	8	6	6	0	6	8	14	-0.93277	-1.31182	-0.56463	-0.00924349	-0.0666666	-0.0455228	0.0451685	-0.296309	0.0243461	-0.0555556	0.0167231	0.0282453
NexinGlia	Nontoxin	Nontoxin	22.39	36.89	59.01	19.52	21.01	22.89	37.39	43.03	32.7662	13.8942	0.42404	FALSE	1191	0.295833	0	2	2	2	0	2	2	4	-0.057431	-0.188546	0.0945699	0.467213	-0.25	0.285714	0.565789	-0.142857	0.460526	1	0.222222	0.21453
NFkappaInh-a	Nontoxin	Nontoxin	11.81	16.89	11.29	20.61	8.92	7.74	7.59	11.77	12.0775	4.56182	0.377712	FALSE	930	0.294444	0	3	0	0	0	0	3	3	-0.0665776		-0.0665776	-0.0467197	-0.5	-1	0.224138	-0.428571	0.145191	8.88178e-17	0.203704	0.152122
NFkBRas2	Nontoxin	Nontoxin	20.65	26.36	35.49	12.51	15.67	8.61	29.69	30.1	22.385	9.53035	0.425747	FALSE	588	0.186667	0	3	2	2	0	2	3	5	-1.25426	-1.03789	-1.05524	0.0835744	-0.125	0.0857145	0.131579	-0.451428	0.19079	0.666667	0.0444444	-0.054005
NHP2	Nontoxin	Nontoxin	65.47	112.33	136.29	77.69	94.95	88.69	105.94	91.26	96.5775	21.8123	0.225853	FALSE
NicotinamideMT	Nontoxin	Nontoxin	0	14.16	24.27	14.58	10.45	5.52	30.46	58.2	19.705	18.3246	0.929948	FALSE	789	0.335165	0	2	0	0	0	0	2	2	0.259961		0.259961		0		-0.355769		0.136134		0.0357017	0.0357017
NicotinamideMT_2	Nontoxin	Nontoxin	4.92	7.57	8.67	18.93	3.95	6.13	8.95	20.92	10.005	6.38249	0.63793	FALSE	789	0.711111	0	0	2	2	0	2	0	2					1		0.5		-1		0.0454545	0.0454545
Niemann-PickC1	Nontoxin	Nontoxin	10.74	22.44	20.92	10.91	22	17.4	68.38	36.75	26.1925	18.8995	0.721563	FALSE	3876	0.256667	0	9	6	6	0	6	9	15	-0.581027	-0.394114	-0.625986	0.137098	0.0666667	0.486617	0.129601	0.280808	-0.0427887	-0.126806	0.105789	0.0370434
NIMA1	Nontoxin	Nontoxin	19.11	96.25	73.62	39.93	40.56	79.34	65.7	55.76	58.7838	24.9713	0.424799	FALSE	480	0.325	0	1	0	0	0	0	1	1	0.155746		0.155746	0.0336134	-0.333333	-0.272727	0.131579	-0.272727	0.131579	0.666667	-0.0666667	0.180523
NIP7	Nontoxin	Nontoxin	239.14	325.14	217.4	317.57	206.57	317.83	248.83	294.71	270.899	48.3821	0.178598	FALSE	543	0.125	0	1	0	0	0	0	1	1	-1.16221		-1.16221	-0.210526			-0.0961538		-0.0961538	-0.4	0	0.0989399
NipSnap1	Nontoxin	Nontoxin	14.28	32.85	17.14	18.97	14.19	26.39	27.56	22.96	21.7925	6.78107	0.311165	FALSE	846	0.223214	0	8	0	0	0	0	8	8	-0.267913		-0.267913						0.169697		0.169697	0.169697
NodalMod2	Nontoxin	Nontoxin	25.84	45.51	32.42	35.26	31	43.78	39.81	29.18	35.35	7.07315	0.200089	FALSE	3651	0.285256	0	20	6	6	0	6	20	26	-0.219191	-2.00318	0.426698	0.057471	-0.17647	0.0214766	0.0416476	0.0522135	-0.0114053	0.0666668	0.0532662	0.0353299
NovUbi	Nontoxin	Nontoxin	242.22	372.9	296.78	380.29	274.83	602.33	424.66	232.02	353.254	122.253	0.346077	FALSE
NOXP20	Nontoxin	Nontoxin	24.65	33.96	44.49	23.85	52.27	33.12	44.46	7.65	33.0562	14.3012	0.432631	FALSE	1668	0.249359	0	18	8	8	0	8	18	26	-0.707634	-0.876161	-0.563119	0.00974791	-0.047619	0.1141	0.031759	-0.247124	0.043687	-0.0321677	0.0320731	0.0954478
NS1A	Nontoxin	Nontoxin	29.13	47.15	27.7	34.56	18.1	31.62	48.93	49.45	35.83	11.526	0.321685	FALSE	1926	0.325	0	1	1	1	0	1	1	2	0.200738	-1.16221	1.4737	0.727185		0.6	1	0.6	1	0.666667	0.428571	0.39787
NSA2	Nontoxin	Nontoxin	60.49	111.05	102.26	75.93	64.17	77.08	117.58	100.36	88.615	21.8729	0.246831	FALSE	783	0.125	0	1	0	0	0	0	1	1	-1.16221		-1.16221	0	0	-0.428571	0.131579				0	-0.0640732
NSF-attachment	Nontoxin	Nontoxin	14.64	19.97	26.02	15.52	11.22	13.97	26.05	19.24	18.3287	5.52043	0.30119	FALSE	945	0.191667	0	4	2	2	0	2	4	6	-1.24597	0.200738	-1.83088	0.137132	0	0.257143	0.168624	0.6	0.177885	0.0266668	0.142857	0.171414
NSFAttachment	Nontoxin	Nontoxin	27.49	53.52	35.42	36.79	35.92	65.28	78.73	42.06	46.9012	17.5236	0.373627	FALSE	897	0.261458	0	8	0	0	0	0	8	8	-0.477402		-0.477402	-0.0557166	-0.166667	-0.127819	-0.0360884	-1	0.015404	-0.113675	0.0206044	0.143781
NSFL1	Nontoxin	Nontoxin	26.66	19.49	6.39	31.8	21	52.54	45.33	25.36	28.5712	14.6947	0.514319	FALSE	1110	0.303768	0	13	1	1	0	1	13	14	-0.00633506	-1.0535	0.150607	0.0713602	-0.194063		0.0144523	0.149966	-0.00567676	0.130403	0.00236057	0.0722567
NSUN2	Nontoxin	Nontoxin	23.02	28.4	35.78	23.75	32	34.69	38.13	24.97	30.0925	5.86852	0.195016	FALSE	2319	0.234524	0	10	4	4	0	4	10	14	-0.862517	-1.11717	-0.625362	0.0553498	-0.047619	0.0145366	0.0112425	0.369023	0.0786926	-0.088205	0.0618132	0.0771632
NTermEnhSplit	Nontoxin	Nontoxin	17.97	33.69	21.29	27.66	31.31	25.47	35.54	31.79	28.09	6.17165	0.21971	FALSE	594	0.185606	0	4	0	0	0	0	4	4	-0.571302		-0.571302						0.0874125	-0.133333	-0.00438367	0.166667
NtermGlutAmid	Nontoxin	Nontoxin	42.23	47.32	62.07	31.55	31.28	42.72	50.44	65.17	46.5975	12.5059	0.268382	FALSE	627	0.125	0	4	1	1	0	1	4	5	-1.9286	-1.16221	-1.83088	-0.126316	0	-0.428571	-0.0392206	-0.428571	-0.0392206	-0.4	0	0.0337347
NTermMethyltransferase	Nontoxin	Nontoxin	12.14	35.75	20.54	21.77	11.21	25.31	18.11	18.17	20.375	7.78756	0.382212	FALSE	672	0.260417	0	7	1	1	0	1	7	8	-0.489863	-1.16221	-0.252591	0.0293943	0.133333	0.0685716	-0.0261871	-0.175324	0.0976848	-0.00692629	-0.0125	0.0811621
NTF2-1	Nontoxin	Nontoxin	35.57	52.65	29.26	26.01	32.7	29.09	54.74	33.92	36.7425	10.9046	0.296785	FALSE
NTF2-2	Nontoxin	Nontoxin	23.79	47.95	42.95	34.75	34.07	42.81	38.88	28.85	36.7563	7.98833	0.217333	FALSE
nubp1A	Nontoxin	Nontoxin	38	37.67	38.35	36.29	32.77	42.38	54.44	30.15	38.7562	7.33887	0.18936	FALSE	981	0.43956	0	3	3	3	0	3	3	6	1.52208	1.49849	1.07969	0.248685	0.0112783		0.459544	-0.243506	0.189745	0.0128672	0.255135	0.278063
NucAssembly1-4	Nontoxin	Nontoxin	31.35	49.77	74.42	34.37	40.73	43.96	80.38	51.85	50.8538	17.8544	0.351093	FALSE	1164	0.125	0	1	1	1	0	1	1	2	-1.49796	-1.16221	-1.16221	-0.210526			-0.0961538		-0.0961538	-0.4	0	0.0989399
NucCap2	Nontoxin	Nontoxin	59.91	127.54	66.85	80.32	72.92	109.89	109.33	82.58	88.6675	24.042	0.271148	FALSE	492	0.125	0	2	0	0	0	0	2	2	-1.49796		-1.49796	0.169247		0.6	-0.0961538	0.6	-0.0961538	0.133333	0	0.0174334
NucDPKin	Nontoxin	Nontoxin	952.1	682.6	1017.94	629.03	459.82	479.26	953.54	1119.46	786.719	255.36	0.324588	FALSE
NucGTP1	Nontoxin	Nontoxin	105.15	276.15	198.07	135.56	91.4	52.05	250.7	529.28	204.795	152.805	0.746139	FALSE	1905	0.30625	0	6	2	2	0	2	6	8	0.0584313	-1.03789	0.53662	0.434255	0.666667	0.188572	0.327834	0.76	0.540769	0.12	0.225893	0.2145
NuclearReceptorBinding	Nontoxin	Nontoxin	12.25	25.75	18.48	14.95	14.84	17.58	24.7	16.66	18.1513	4.77078	0.262835	FALSE	1608	0.271667	0	5	0	0	0	0	5	5	-0.324765		-0.324765	-0.0355325	-0.111111	-0.033766	0.115034	-0.272727	0.0049318	-0.171795	0.0644445	0.145632
Nucleobindin2	Nontoxin	Nontoxin	388.01	615.38	531.06	557.06	727.9	585.28	1341.59	1061.16	725.93	317.154	0.436893	FALSE	1401	0.241667	1	2	2	2	1	3	2	5	-0.652823	-0.17346	-1.03789	0.140178	0	0.0857145	0.0991958	0.514285	0.20519	-0.0722223	0.15	0.221735
Nucleolar10	Nontoxin	Nontoxin	15.45	26.17	32.98	18	15.2	16.94	32.07	26.1	22.8637	7.37701	0.322651	FALSE	2067	0.303788	0	7	4	4	0	4	7	11	0.0303672	-0.316959	0.248497	0.0466569	-0.222222	-0.453571	0.148293	-0.366234	0.0662535	0.277778	0.0251747	0.0441989
Nucleolar12-1	Nontoxin	Nontoxin	28.71	35.48	45.78	17.57	22.63	25.55	51.07	32.21	32.375	11.4207	0.352764	FALSE	630	0.158333	1	3	2	2	1	3	3	6	-1.62458	-1.69654	-1.05524	-0.0271645	0	-0.428571	0.0177126	-0.142857	0.125281	-0.4	0.0555555	0.0310305
Nucleolar16	Nontoxin	Nontoxin	34.04	94.12	69.71	75.31	46.81	49.19	81.05	115.25	70.685	26.8326	0.379608	FALSE	528	0.125	0	0	3	3	0	3	0	3	-1.69654	-1.69654		0.042656		0.6	-0.0961538	0.6	-0.0961538	-0.0444443	0	0.0446022
NucleolysinTIAR	Nontoxin	Nontoxin	33.13	53.09	29.03	32.52	27.25	36.78	47.86	70.22	41.235	14.787	0.358604	FALSE	1167	0.395833	0	4	0	0	0	0	4	4	0.980683		0.980683	0.347535	-0.291666	-0.120301	0.466489	0.473684	0.538652	1	0.301587	0.283227
Nucleophosmin	Nontoxin	Nontoxin	243.89	329.38	371.69	284.25	290.87	341.27	434.94	405.13	337.678	64.4648	0.190906	FALSE	906	0.125	0	1	1	1	0	1	1	2	-1.49796	-1.16221	-1.16221	0.54902		0.6		0.6		0.666667	0	-0.0640732
Nucleosome1	Nontoxin	Nontoxin	53.05	74.23	87.29	56.89	35.21	36.61	85.09	142.9	71.4087	35.107	0.491634	FALSE	1182	0.125	0	0	1	1	0	1	0	1	-1.16221	-1.16221		0	0			-0.428571	0.131579		0	-0.0640732
NucRec4A1	Nontoxin	Nontoxin	111.57	11.02	9.85	10.65	9.31	5.63	12.86	17.23	23.515	35.7306	1.51948	TRUE	1758	0.247222	0	3	3	3	0	3	3	6	-0.614966	-1.69654	0.654882	-0.0184367	0.05	-0.376623	0.0209317	0.0150377	0.0944119	-0.3	0.058642	0.0471691
NucRibonucleoproteinG	Nontoxin	Nontoxin	392.84	410.1	571.4	289.03	412.61	342.52	305.97	364.23	386.088	87.7343	0.22724	FALSE
NucTFYbeta	Nontoxin	Nontoxin	4.91	23.23	27.34	24.76	14.59	19.46	13.36	22.72	18.7963	7.40781	0.394111	FALSE
nudC-1	Nontoxin	Nontoxin	12.35	12.28	14.95	14.21	14.81	16.85	21.63	13.55	15.0787	3.03588	0.201335	FALSE	1761	0.203125	0	1	7	7	0	7	1	8	-1.17523	-1.70018	1.52862	-0.0930153	-0.277778	-0.619047	-0.0133154	-0.428571	0.0451398	-0.155556	0.0294118	0.130361
NudC2	Nontoxin	Nontoxin	18.93	28.91	19.13	38.64	17.74	39.82	24.76	28.19	27.015	8.64152	0.319879	FALSE	474	0.305494	0	4	1	1	0	1	4	5	0.0133351	-0.264521	0.120002	0.464796	0.0502392		0.888889	-0.0571426	0.237573	0.833333	0.219764	0.138815
NudE	Nontoxin	Nontoxin	18.99	29.9	17.11	13.35	11.83	13.61	26.17	14.65	18.2012	6.54646	0.359671	FALSE	1035	0.4	0	0	1	1	0	1	0	1	0.649981	0.649981		0.103896		0.6	0.204082	0.6	0.204082	-0.8	0.416667	0.214373
Nup50	Nontoxin	Nontoxin	15.84	39.72	33.36	34.56	26.7	35.4	37.95	27.85	31.4225	7.73447	0.246144	FALSE	1410	0.285256	0	8	5	5	0	5	8	13	-0.206149	-0.634598	0.120737	-0.0494465	1.25e-07	-0.433766	-0.0778426	0.1196	0.0547976	-0.371515	0.0423844	0.0621761
Nup93	Nontoxin	Nontoxin	11.17	19.19	22.07	20.98	15.35	27.32	24.73	11.03	18.98	6.01885	0.317115	FALSE	2460	0.436111	0	10	2	2	0	2	10	12	1.70798	1.79326	1.47847	0.735	0.166667	0.471429	0.85	0.471679	0.840199	0.666667	0.599868	0.653264
Obg1	Nontoxin	Nontoxin	78.46	80.96	131.46	80.86	72	80.2	118.47	96.27	92.335	21.5262	0.233132	FALSE	1191	0.247917	0	4	0	0	0	0	4	4	-0.554861		-0.554861	-0.0481385	-0.111111	0.0225565	-0.0729856	0.0225565	-0.0729856	-0.05	-0.126984	0.0140847
OCIA	Nontoxin	Nontoxin	96.15	163.41	155.57	144.92	86.75	93.08	135.79	182.94	132.326	36.1841	0.273446	FALSE	663	0.245833	0	3	1	1	0	1	3	4	-0.576488	1.30896	-1.34917	-0.104269	-0.166666	-0.376623	0.0144593	-0.376623	0.0144593	-0.8	0.0416668	-0.0340689
Olfactomedin3	Nontoxin	Nontoxin	18.69	14.17	36.66	12.58	8.43	17.75	15.44	14.95	17.3337	8.42335	0.485951	FALSE	1176	0.308333	0	1	2	2	0	2	1	3	0.067026	0.377685	-0.448318	0.495464	0.5	0.485714	0.55749	0.6	0.561358	-0.181818	0.311111	0.198055
OMethyltransferase	Nontoxin	Nontoxin	19.78	31.03	32.3	18.22	20.47	24.85	27.47	32.79	25.8637	5.90675	0.228379	FALSE	735	0.221667	0	3	2	2	0	2	3	5	-0.871529	-1.49796	-0.14674	0.422883	0	0.425455	0.157729	0.425455	0.346469	0.49697	0.0451128	0.0333433
OriginRec2	Nontoxin	Nontoxin	9.57	18.72	24.64	16.93	16.05	13.49	30.92	18.27	18.5738	6.60439	0.355577	FALSE	1692	0.261458	0	3	5	5	0	5	3	8	-0.477402	0.0215179	-1.05524	-0.0665435	-0.125	-0.127819	0.0159834	-0.714286	-0.0184951	-0.177289	0.0349465	0.122168
OriginRec3	Nontoxin	Nontoxin	22.23	18.83	34.21	25.08	22.87	30.56	39.3	28.96	27.755	6.81882	0.245679	FALSE	2136	0.327381	0	4	3	3	0	3	4	7	0.304173	-0.494109	0.872546	-0.195948	-0.0555555	-0.0171426	0.00797249	-1.25714	-0.404385	-0.524444	-0.103741	-0.0374654
ORM1-1	Nontoxin	Nontoxin	9.85	30.8	15.49	24.47	22.84	27.85	17.43	23.7	21.5538	6.87286	0.318871	FALSE	462	0.2625	0	2	0	0	0	0	2	2	-0.330104		-0.330104	0.270917	0		0.561358	-0.428571	0.346469	0.444444	0.208334	0.320012
OrnithinAminoTrans	Nontoxin	Nontoxin	97.06	179.48	98.23	106.7	45.64	53.87	189.34	403.49	146.726	115.93	0.790109	FALSE	1320	0.405555	0	2	1	1	0	1	2	3	1.00225	1.03439	0.660801	-0.0376218	-0.1	-0.324675	0.037699	-0.224242	-0.249702	0.161616	-0.123016	-0.0687405
OrnithineDecarb	Nontoxin	Nontoxin	1046.26	583.58	631.55	225.64	662.76	543.66	680.92	444.18	602.319	232.519	0.38604	FALSE	1383	0.232292	0	7	1	1	0	1	7	8	-0.826316	1.03439	-1.18517	0.139715	-0.0833332	0.257143	0.242036	-0.085714	0.160673	0.0969698	0.129167	0.138445
OSTC	Nontoxin	Nontoxin	145.63	197.91	219.3	131.57	171	167.45	196	149.45	172.289	30.1049	0.174735	FALSE
Oxidoreductase	Nontoxin	Nontoxin	24.27	28.21	29.71	81.12	24.49	45.33	42.02	61.26	42.0512	20.2645	0.4819	FALSE	777	0.125	0	3	0	0	0	0	3	3	-1.69654		-1.69654	0	0			-0.428571	0.131579		0	-0.0640732
Oxidoreductase-HTATIP2	Nontoxin	Nontoxin	76.17	87.88	81.2	87.12	51.12	67.05	92.2	67.82	76.32	13.7296	0.179895	FALSE	699	0.50625	0	2	2	2	0	2	2	4	2.12693	1.6871	1.79326	0.0471468	-0.375	0.105263	-0.212957	0.473684	-0.176211	0.444444	-0.0416668	-0.154687
OxysterolBinding2	Nontoxin	Nontoxin	11.61	26.92	19.3	9.32	14.56	12.72	21.93	13.64	16.25	5.94135	0.365621	FALSE	1425	0.255555	0	5	1	1	0	1	5	6	-0.520315	-1.16221	-0.215413	-0.0809657	-0.125	-0.636363	0.0756218	-0.885714	-0.00655136	-0.4	0.0277777	0.0459867
P2X-4	Nontoxin	Nontoxin	43.83	139.07	50.39	63.8	54.61	69.42	75.18	57.95	69.2812	29.961	0.432454	FALSE	1221	0.281667	0	5	0	0	0	0	5	5	-0.215413		-0.215413	-0.0833273	-0.166667	-0.714286	-0.0294565	-0.428571	0.147913	8.88178e-17	0.0200001	-0.0135462
P4H-a1	Nontoxin	Nontoxin	77.42	84	117.95	100.47	72.81	103.98	102.69	74.07	91.6737	16.769	0.182921	FALSE	1638	0.458333	0	4	1	1	0	1	4	5	1.71648	1.52862	1.43486	0.473976	-0.166666	0.434286	0.538587	0.434286	0.538587	-0.090909	0.553333	0.379985
P97VCP	Nontoxin	Nontoxin	68.41	106.53	75.46	113.24	108.15	137.8	148.08	48.72	100.799	34.3294	0.340574	FALSE	2421	0.355833	0	11	0	0	0	0	11	11	0.412155		0.412155	0.018229	-0.142857	-0.339517	0.0959183	0.009091	0.128676	-0.0133902	0.0782412	0.195033
PAC2	Nontoxin	Nontoxin	10.57	13.04	21.29	8.61	8.95	18.82	17.74	6.93	13.2437	5.38536	0.406634	FALSE	795	0.2	0	4	5	5	0	5	4	9	-1.23533	-0.452344	-1.83088	-0.0423759	-0.0555555	-0.033766	0.0124887	-0.231168	-0.0758205	-0.103419	-0.0324786	0.0297522
Pallidin	Nontoxin	Nontoxin	4.48	13.22	21.52	19.13	14.19	19.49	43.64	15.9	18.9462	11.2802	0.595378	FALSE	510	0.216117	0	0	3	3	0	3	0	3	-0.839843	-0.839843		0.582937	0.557895		0.777778	-0.428571	0.131579		0.175901	0.019776
palmdelphin	Nontoxin	Nontoxin	14.34	37.25	30.97	26.33	3.44	19.62	27.81	52.01	26.4712	14.7115	0.555755	FALSE	1623	0.277778	0	4	5	5	0	5	4	9	-0.287461	-0.415893	-0.057431	0.280387	0	-0.090909	0.342588	0.0857145	0.342308	0.301587	0.215609	0.360279
Pancreatic	Nontoxin	Nontoxin	886.88	894.8	679.86	667.31	563.88	429.32	625.72	822.64	696.301	163.266	0.234476	FALSE	345	0.191667	0	3	0	0	0	0	3	3	-1.05524		-1.05524	0.0848633	0		0.179196	-0.428571	0.163323	0	0.111111	0.202099
paraspeck1	Nontoxin	Nontoxin	15.69	22.16	16.97	25.71	9.01	20.16	17.11	17.57	18.0475	4.92213	0.272732	FALSE	1584	0.355556	0	3	3	3	0	3	3	6	0.615496	0.22735	0.815206	0.260004	-0.0833332	-0.231579	0.250738	-0.171428	0.269283	0.4	0.089981	0.242432
PARN	Nontoxin	Nontoxin	10.83	35.86	17.01	21.02	15.88	24.55	19.78	14.4	19.9163	7.69636	0.386436	FALSE	1719	0.24359	0	10	3	3	0	3	10	13	-0.739357	-1.05524	-0.522232	0.232539	0.0476191	0.167347	0.244435	0.126531	0.246481	0.241026	0.182051	0.142631
Parvalbumin	Nontoxin	Nontoxin	6487.88	17578	1834.21	2439.22	158.87	1373.61	641.69	1771.37	4035.6	5801.04	1.43747	TRUE
PCTP	Nontoxin	Nontoxin	48.84	41.02	51.37	64.98	19.66	31.28	19.68	46.61	40.43	15.9344	0.394123	FALSE	801	0.255102	0	6	1	1	0	1	6	7	-0.267913	-0.448318	-0.160737						0		0	0
PDE4-1	Nontoxin	Nontoxin	13.53	29.44	26.32	14.5	24.24	21.58	47.04	24.29	25.1175	10.4314	0.415303	FALSE	1359	0.291667	0	4	4	4	0	4	4	8	-0.116026	-0.122313	-0.0790584	0.239491	-0.111111	-0.428571	0.312139	-0.428571	0.374764	0.255555	0.233902	0.395232
PDE6	Nontoxin	Nontoxin	117.84	233.89	135.5	98.85	25.44	82.51	100.24	231.15	128.178	71.9326	0.561195	FALSE	1317	0.184524	0	4	3	3	0	3	4	7	-1.36612	-0.707875	-1.54972	0.0635387	-0.166667	-0.216326	0.11336	0.0857145	0.0556681	0.333334	0.0793651	-0.0392237
PDHFinger-5A	Nontoxin	Nontoxin	20.74	39.06	39.85	31.3	19.71	46.17	50.09	33.6	35.065	10.9885	0.313375	FALSE	333	0.258333	0	3	0	0	0	0	3	3	-0.413947		-0.413947	-0.030303	0		0.172414	-0.428571	-0.0736143	8.88178e-17	-0.0444445	0.0225779
PDI	Nontoxin	Nontoxin	10759.4	15952.9	10511.7	11827.2	7096.83	8573.35	22779.2	24292.1	13974.1	6450.94	0.461636	FALSE	1557	0.143056	0	5	1	1	0	1	5	6	-1.7981	-1.16221	-1.69167	-0.0488473	0	0.0857145	-0.129919	0.0857145	-0.0506072	-0.186667	-0.0238095	0.00669772
PDI-A3	Nontoxin	Nontoxin	1787.73	2298.85	1350.99	2378.07	1632.91	2001.41	1789.63	2931.61	2021.4	498.822	0.246771	FALSE	1497	0.288462	0	6	2	2	0	2	6	8	-0.187233	-1.35784	0.368244	-0.174985	-0.136363		-0.356133	0.236842	-0.0218656	-0.314286	0.036425	-0.0311958
PDI-A4	Nontoxin	Nontoxin	1597.38	956.58	980.28	229.87	804.28	383.77	858.93	1185.99	874.635	430.787	0.492534	TRUE	1911	0.411111	0	3	0	0	0	0	3	3	1.05569		1.05569	0.387879	0	1	1	-1	0.25		0.444445	0.214478
PDI-A5	Nontoxin	Nontoxin	27.62	40.87	53.24	36.06	37.11	45.1	51.42	41.02	41.555	8.37784	0.201608	FALSE	1599	0.194444	0	3	3	3	0	3	3	6	-1.21442	-1.0018	-1.05524	0.264611	0.222222	0.8	-0.0961538	0.243308	0.162608	0.2	0.0648148	-0.0392498
PDI-A6	Nontoxin	Nontoxin	2279.21	1642.63	1793.31	636.78	1492.25	1843.69	1514.45	1329.45	1566.47	473.712	0.302407	FALSE	1350	0.3125	0	5	3	3	0	3	5	8	0.133199	0.280792	0.00329248	0.0799694	0.0333333	-0.357143	0.218259	0.0225565	0.0825812	-0.137436	0.105733	0.104962
PDI-TMX3	Nontoxin	Nontoxin	10.58	18.98	20.88	13.43	17.53	11.87	27.17	17.72	17.27	5.38381	0.311744	FALSE	1371	0.425	0	2	2	2	0	2	2	4	1.28347	1.05009	1.05009	0.536167	-0.5	0.257143	0.646531	0.0666667	0.676136	0.577778	0.56746	0.586331
PDZ11	Nontoxin	Nontoxin	15.96	33.96	14.64	15.58	15.74	17.12	23.38	15.35	18.9662	6.65914	0.351105	FALSE	435	0.236111	0	3	0	0	0	0	3	3	-0.627713		-0.627713	-0.172097	0	-0.272727	-0.137363	0.6	0.0039248	-0.533333	0.0555557	0.0792698
PDZK1-1	Nontoxin	Nontoxin	46.4	29.9	41.06	63.32	42.19	27.56	69.46	114.96	54.3562	28.4995	0.524309	FALSE	396	0.366667	0	0	2	2	0	2	0	2	0.554633	0.554633		-0.160919	-0.166666	-0.636363	0.01511	-0.272727	-0.21978	-0.8	0	-0.0980741
Pelota	Nontoxin	Nontoxin	19.54	10.72	7.6	19.21	10.51	23.27	15.05	10.4	14.5375	5.5987	0.385121	FALSE	1158	0.219697	0	4	0	0	0	0	4	4	-0.143771		-0.143771					0.500752	0.648872	0.666667	0.421035	0.194444
PEN-2	Nontoxin	Nontoxin	41	127.11	38.29	83.38	55.42	49.69	63.19	59.59	64.7087	28.8913	0.446482	FALSE
PepMethSulfRed	Nontoxin	Nontoxin	14.06	32.69	15.23	32.71	21.5	12.81	31.34	67.94	28.535	18.0421	0.632281	FALSE	495	0.2625	0	2	0	0	0	0	2	2	-0.330104		-0.330104	-0.145531	-0.5	-0.272727	0.0177126	-1.8	0.0769231	0.133333	-0.0128205	0.156656
PepproCisIso2	Nontoxin	Nontoxin	20.59	39.67	21.28	41.29	17.47	35.97	52.54	45.7	34.3137	13.0048	0.378997	FALSE	1560	0.271296	0	13	5	5	0	5	13	18	-0.397766	-1.45474	0.121979	0.105414	0.05	-0.0271284	0.212691	-0.493877	0.153324	-0.0429293	0.107516	0.166375
PeptidaseD	Nontoxin	Nontoxin	23.96	32.19	32.27	44	27.65	38.01	47.94	29.08	34.3875	8.2877	0.241009	FALSE	1485	0.285784	0	11	6	6	0	6	11	17	-0.205042	-0.0312855	-0.283046	0.0957495	-0.0641025	0.1	0.236526	-0.65068	0.103826	0.161772	0.0466854	0.0880417
PeptideChainRelease1	Nontoxin	Nontoxin	70.47	64.41	79.45	51.42	69.58	89.03	114.86	53.87	74.1363	20.5775	0.277563	FALSE	1314	0.325	0	1	0	0	0	0	1	1	0.155746		0.155746	0.258065	0	0.428571	0.555556	-0.428571	0.131579		0.333333	0.180523
Peptidyl-tRNAHydrolase2	Nontoxin	Nontoxin	27.16	46.23	53.64	48.18	28.64	54.24	53.3	41.71	44.1375	10.8978	0.246905	FALSE	519	0.321528	0	10	2	2	0	2	10	12	0.255568	1.40398	-0.109716	-0.0942853	-0.1	0.188572	0.0374357	-0.410625	-0.173186	-0.11282	-0.0556516	0.0620245
PeptidylProlylIsomerase-FKBP14	Nontoxin	Nontoxin	57.04	50.56	106.98	19.29	42.19	26.79	60.23	57.59	52.5837	26.5875	0.505621	FALSE	630	0.294444	0	0	3	3	0	3	0	3	-0.0665776	-0.0665776		0.356747	0.25	0.514285	0.50505	-1.8	0.352272	0.533334	0.1	0.227214
PerCoARed	Nontoxin	Nontoxin	46.89	62.97	67.52	66.62	40.43	55.49	62.67	35.05	54.705	12.477	0.228078	FALSE	885	0.342592	0	7	2	2	0	2	7	9	0.502428	-0.188546	0.693908	0.495516	0.0952381	0.531257	0.646481	0.21244	0.394371	0.544445	0.221216	0.248271
PeriodicTrp1	Nontoxin	Nontoxin	23	25.95	42.28	24.31	20.94	21.82	44.96	55.59	32.3563	13.2655	0.409981	FALSE	1503	0.175	0	2	2	2	0	2	2	4	-1.31182	-0.648609	-1.49796	-0.126815	-0.111111	-0.428571	-0.0652629	-0.428571	-0.0652629	-0.4	-0.0166667	-0.0406451
PeroxideReductase	Nontoxin	Nontoxin	40.17	111.81	84.53	98.07	60.22	61.58	87.68	142.2	85.7825	32.3733	0.377388	FALSE	777	0.304167	0	5	1	1	0	1	5	6	0.0318151	-1.16221	0.422478	0.0970329	-0.111111	0.172932	0.13835	0.736842	0.191267	-0.238461	0.216931	0.188496
Peroxiredoxin-2	Nontoxin	Nontoxin	14.27	53.52	28.69	22.64	12.02	12.43	28.54	13.68	23.2238	14.0897	0.606691	FALSE	597	0.125	0	4	0	0	0	0	4	4	-1.83088		-1.83088	-0.210526			-0.0961538		-0.0961538	-0.4	0	0.0989399
Peroxiredoxin1	Nontoxin	Nontoxin	90.94	206.42	143.96	160.33	88.03	93.43	194.29	89.5	133.363	49.6593	0.372363	FALSE	600	0.25	0	3	0	0	0	0	3	3	-0.494109		-0.494109	0.0609137	0	0.473684	-0.21978	0.0476193	0.155747	-0.153846	0.0994153	-0.0948828
Peroxiredoxin4	Nontoxin	Nontoxin	586.07	833.91	329.63	648.77	638.17	839.69	633.01	527.16	629.551	164.188	0.260802	FALSE	801	0.258333	0	1	2	2	0	2	1	3	-0.413947	-1.49796	1.4737	0.48479	0	0.257143	0.565789	0.6	1	0.666667	0.285714	0.243889
peroxiredoxin5	Nontoxin	Nontoxin	122.56	236.8	97.74	145.2	126.33	152.22	163.45	181.21	153.189	42.5611	0.277835	FALSE	612	0.422223	0	2	1	1	0	1	2	3	1.00011	0.263379	1.15484					-0.333333	0.222222	-0.428571	0.418103	-0.159873
Peroxiredoxin6	Nontoxin	Nontoxin	162.85	224.78	251.84	373.95	131.15	154.66	376.72	269.14	243.136	94.7633	0.389754	FALSE	669	0.125	0	2	0	0	0	0	2	2	-1.49796		-1.49796	0	0	-0.428571	0.131579				0	-0.0640732
Peroxisomal2	Nontoxin	Nontoxin	13.18	16.02	14.57	26.75	7.64	12.84	13.47	11.42	14.4863	5.53536	0.382111	FALSE	2214	0.25	0	3	4	4	0	4	3	7	-0.600569	-0.554861	-0.467388	0.0732197	0	-0.0742858	0.205594	0.0818182	0.077731	-0.171717	0.0824176	0.00639199
PeroxisomalBiogen3	Nontoxin	Nontoxin	29.98	58.36	42.93	46.84	35.58	32.43	50.51	27	40.4537	11.0033	0.271998	FALSE	1119	0.322916	0	4	0	0	0	0	4	4	0.223725		0.223725	0.212611	-0.0833332	0.52381	0.263245	0.0225565	0.107136	0.133333	0.205257	0.029881
PeroxisomalIsom	Nontoxin	Nontoxin	71.75	83.12	76.86	45.15	79.76	50.85	119.79	77.64	75.615	22.6367	0.299368	FALSE	1074	0.161111	0	2	1	1	0	1	2	3	-1.34917	-0.448318	-1.49796	-0.031746	-0.111111	-0.428571	0.131579	-0.428571	0.131579		0.0555557	-0.0240674
PeroxisomalMP11B	Nontoxin	Nontoxin	8.22	24.02	9.67	20.03	12.14	24	14.22	19.16	16.4325	6.23029	0.379144	FALSE	747	0.252778	0	4	2	2	0	2	4	6	-0.551865	-1.03789	-0.122313	0.143979	0.222222	-0.136363	0.309284	-0.033766	0.102366	0.186667	0.0641027	0.209136
PEST	Nontoxin	Nontoxin	66.03	48.8	67.37	47.49	37.69	50.46	52.94	76.24	55.8775	12.7559	0.228283	FALSE
PEthBind1	Nontoxin	Nontoxin	51.55	115.01	77.5	117.09	68.48	52.41	69.73	55.16	75.8662	26.4487	0.348623	FALSE	564	0.143056	0	6	0	0	0	0	6	6	-1.7981		-1.7981	-0.0701753	0	-0.428571	0.0556681	-0.428571	-0.163684	-0.4	-0.0238095	-0.04764
PGMutase1	Nontoxin	Nontoxin	29.73	89.64	52.41	51.89	46.52	72.98	56.74	33.47	54.1725	19.6802	0.363287	FALSE	768	0.377778	0	3	0	0	0	0	3	3	0.735044		0.735044	0.0470814	-0.166666	-0.428571	0.0367877	-0.428571	0.178075	0.096866	0.0470087	0.288397
Phenylalanyl-tRNASyn-a	Nontoxin	Nontoxin	10.03	22.14	12.06	11.12	14.41	18.99	27.28	26.98	17.8762	7.00799	0.392028	FALSE	1521	0.25	0	2	1	1	0	1	2	3	-0.494109	1.30896	-1.49796	0.559953	0	0.733333	1	0.0666667	0.25	0.666667	0.222222	0.0865362
Phenylalanyl-tRNASyn-b	Nontoxin	Nontoxin	14.08	17.04	26.25	15.71	11.28	13.19	23.87	11.53	16.6187	5.59265	0.336526	FALSE	1770	0.25	0	5	3	3	0	3	5	8	-0.614475	-1.05524	-0.178962	0.145398	0	1	0.0254083	0.142857	0.0310138	0.0542126	0.0999999	0.0412087
Phos2B	Nontoxin	Nontoxin	10.22	21.27	22.22	11.69	13.05	13.72	13.2	11.76	14.6413	4.52603	0.309129	FALSE	1347	0.238542	0	6	2	2	0	2	6	8	-0.751549	-1.49796	-0.283688	-0.00145675	0.0833333	-0.224242	0.20313	-0.257143	0.0430032	-0.245454	0.0462962	0.0377945
Phosducin	Nontoxin	Nontoxin	10.38	28.66	7.47	19.18	14.07	23.53	27.5	28.88	19.9587	8.5183	0.426795	FALSE	888	0.195055	0	4	4	4	0	4	4	8	-1.29399	-1.34889	-0.896926	0.072498	-0.0642855		0.106667	-0.0642855	0.133137	0.106667	0.050667	0.0883115
Phosducin3	Nontoxin	Nontoxin	34.83	47.05	70.3	49.57	42.96	40.04	40.46	47.31	46.565	10.7153	0.230115	FALSE	729	0.125	0	1	0	0	0	0	1	1	-1.16221		-1.16221	0	0	-0.428571	0.131579				0	-0.0640732
PhosGlycBioF	Nontoxin	Nontoxin	44.22	22.89	41.65	22.95	15.81	22.83	46.6	36.94	31.7362	11.8957	0.374831	FALSE	660	0.223809	0	5	2	2	0	2	5	7	-0.906789	-0.648609	-0.853303	0.322355	-0.222222	0.0857145	0.239024	0.228572	0.345018	0.611111	0.154762	0.114898
PhosphateCarrier	Nontoxin	Nontoxin	232.48	314.41	368.82	402.34	209.48	271.69	547.91	535.72	360.356	129.202	0.358539	FALSE	1086	0.216667	0	2	1	1	0	1	2	3	-0.814758	-1.16221	-0.330104	0.0665767	0	0.6	0.179196	0.0857145	0.163323	-0.2	0.166667	0.114931
PhosphateCarrier_2	Nontoxin	Nontoxin	8.61	167.3	31.75	28.34	2.2	17.17	13.64	22.87	36.485	53.7642	1.4736	TRUE	1086	0.18315	0	1	2	2	0	2	1	3	-1.15395	-1.35784	-0.264521	0.0799568		0.6	0	0.6	0	-0.27619	0.0749774	0.203055
PhosphatidateCytidylyltransferase-1	Nontoxin	Nontoxin	19.77	33.37	34.41	37.05	23.56	43.06	40.96	19.55	31.4663	9.32985	0.296503	FALSE	1335	0.243333	0	10	0	0	0	0	10	10	-0.718178		-0.718178	0.219102	-0.2	0.0424243	0.350571	-0.16141	0.144827	0.372222	0.11038	0.152105
PhosphoacetylglucosamineMutase	Nontoxin	Nontoxin	25.54	40.31	25.7	30.12	26.66	28.79	36.37	38.95	31.555	6.07862	0.192636	FALSE	1629	0.240625	0	4	4	4	0	4	4	8	-0.726627	0.00745111	-1.26856	0.12718	0.166667	0.268421	-0.000506033	-0.090909	0.142423	0.188889	0.0145503	0.0457226
Phosphoglucomutase1	Nontoxin	Nontoxin	20.41	52.24	26.24	31.64	25.94	40.8	43.99	21.54	32.85	11.5811	0.352544	FALSE	1689	0.315385	0	10	3	3	0	3	10	13	0.179402	0.788486	-0.0787772	0.19058	-0.183333	0.284879	0.133758	0.00918967	0.118416	0.444444	0.0748474	0.0848202
PhosphoglycerateKin1	Nontoxin	Nontoxin	119.68	249.2	162.57	168.79	89.59	137.78	169.53	196.97	161.764	48.6242	0.300588	FALSE	1254	0.245833	0	4	0	0	0	0	4	4	-0.576488		-0.576488	0.38279	0.583333	0.542857	0.486467	0.163636	0.0177126	0.311111	0.116228	0.136166
PhosphoglycerateMutase2	Nontoxin	Nontoxin	70.29	296.32	25.26	36.99	8.23	29.66	20.5	57.99	68.155	94.3567	1.38444	TRUE	765	0.323333	0	3	2	2	0	2	3	5	0.240223	1.08547	-0.467388	0.257708	-0.166666	0	0.342739	0.0225565	0.257944	0.372222	0.171429	0.386065
PhosphohistidineP	Nontoxin	Nontoxin	85.86	113.68	79.5	113	50.07	93.76	103.01	111.48	93.795	21.8472	0.232925	FALSE	363	0.2625	0	2	0	0	0	0	2	2	-0.330104		-0.330104	0.219512	0.1	-0.428571	0.131579	0.473684	0.742188		0.208334	0.0751499
PhosphohistPP	Nontoxin	Nontoxin	12.27	10.62	4.48	51.96	14.44	55.67	25.18	44.75	27.4213	20.3965	0.743819	TRUE	363	0.151515	0	2	0	0	0	0	2	2	-0.0334055		-0.0334055					-0.272727	0.131579	0.666667	-0.153488	0.25
Phosphomannomutase2	Nontoxin	Nontoxin	25.98	55.18	55.53	58.42	44.38	71.96	40.53	29.1	47.635	15.5877	0.327233	FALSE	750	0.188889	0	5	1	1	0	1	5	6	-1.27752	-0.448318	-1.32716	0.111292	0	0.542857	-0.0187069	-0.0171426	-0.106751	0.0266668	-0.010989	-0.0473071
PhosphomevalonateKinase1	Nontoxin	Nontoxin	17.77	45.92	23.65	40.03	29.27	44.05	57.6	33.72	36.5012	12.9799	0.355602	FALSE	570	0.213095	0	6	1	1	0	1	6	7	-1.03206	-1.16221	-0.835818	0.0816683	0.5	0.557143	0.0846794	0.6	-0.00949592	-0.249495	0.119048	0.0729638
PhosphoserinePhosphatase	Nontoxin	Nontoxin	123.25	211.9	124	139.49	134.85	110.22	543.17	115.88	187.845	147.083	0.783004	FALSE	681	0.275	0	3	1	1	0	1	3	4	-0.273705	0.155746	-0.413947	0.486092		0.6	0.454545	0.6	0.454545	0.466667	0.25	0.412553
PhytanoylCoAdioxygenase1-1	Nontoxin	Nontoxin	19.03	6.3	15.07	51.79	10.76	6.93	26.17	112.94	31.1238	36.1855	1.16263	FALSE	882	0.327672	0	7	4	4	0	4	7	11	0.290672	-0.218974	0.566932	-0.22806	-1.41212	-0.918367	0.0776765		0.0112822	-0.283333	0.134544	0.136657
PIH1-1-1	Nontoxin	Nontoxin	11.71	24.95	20.41	7.75	11.05	9.85	21.41	11.83	14.87	6.37836	0.428941	FALSE	864	0.25	0	3	3	3	0	3	3	6	-0.583416	-1.34917	0.360954	0.164064	0.222222	0.254737	0.194459	-0.2	-0.171834	0.0212122	0.0410053	-0.0618389
PINAGT-Y	Nontoxin	Nontoxin	19.5	56.27	25.66	15.44	13.04	17.81	42.16	67.47	32.1688	20.6386	0.641574	FALSE	216	0.125	0	1	0	0	0	0	1	1	-1.16221		-1.16221	-0.210526			-0.0961538		-0.0961538	-0.4	0	0.0989399
PIRP	Nontoxin	Nontoxin	0.88	6.89	107.18	113.57	2.47	0.22	49.74	64.82	43.2212	48.0642	1.11205	FALSE	1911	0.375309	0	2	7	7	0	7	2	9	0.718181	0.110976	1.97021		-0.105478		0.166667		0.592857		0.261784	0.261784
PITH	Nontoxin	Nontoxin	69.39	117.75	51.18	107.1	85.53	104.55	117.96	103.4	94.6075	23.9565	0.25322	FALSE	636	0.353535	0	2	1	1	0	1	2	3	0.426271	-0.912045	1.15232					0.6	0.104003	-0.451282	0.0584887	0.111111
PKHD	Nontoxin	Nontoxin	105.95	172.72	70.07	150.87	65.7	208.02	50.73	81.86	113.24	57.3289	0.50626	FALSE	966	0.225	0	3	1	1	0	1	3	4	-0.792762	-1.16221	-0.413947	0.0661218	0	0.3	-0.0187069	0.163636	0.0680978	-0.0333333	0.0462962	0.0992184
PlasmaFucosidase	Nontoxin	Nontoxin	13.16	23.56	10.54	15.8	11.08	9.04	9.68	11.45	13.0388	4.75412	0.364615	FALSE	1431	0.383333	0	3	3	3	0	3	3	6	0.930999	1.99092	-0.413947	-0.0640743	-0.46	-0.395671	0.0380112	-0.694545	-0.216871	0.124445	-0.0197369	-0.0459076
Plastin3	Nontoxin	Nontoxin	22.2	52.37	38.93	27.89	16.71	33.22	27.16	23.3	30.2225	11.2441	0.372043	FALSE	1887	0.344791	0	15	1	1	0	1	15	16	0.56816	0.155746	0.581633	0.113382	0.571429	0.72	0.126204	-0.114805	-0.0144922	-0.32704	0.0714162	0.0560474
PlateletAct-2	Nontoxin	Nontoxin	14.16	18.86	11.84	10.99	14.03	16.54	13.02	12.76	14.025	2.57228	0.183407	FALSE	732	0.287879	0	3	1	1	0	1	3	4	-0.20642	-0.912045	0.188754					0.257143	-0.0911437	-0.874073	0.0351783	-0.142857
PLD	Nontoxin	Nontoxin	24.52	23.5	11.56	27.68	32.54	30.74	29.19	31.42	26.3937	6.7963	0.257497	FALSE	1227	0.263021	0	12	4	4	0	4	12	16	-0.501679	-1.26856	-0.131742	0.185776	0.0625	0.25	0.170344	0.332707	0.116024	0.0338462	0.0702877	0.0465068
pleckA2	Nontoxin	Nontoxin	38.99	45.56	4.21	92.47	58.92	190.42	86.41	174.28	86.4075	65.4718	0.757709	FALSE	426	0.30303	0	5	0	0	0	0	5	5	-0.0554339		-0.0554339					0.0428572	-0.0460887	0.128205	-0.0779774	-5.20418e-17
Pleckstrin-A8	Nontoxin	Nontoxin	33.28	39.84	27.48	17.75	20.27	11.25	32.34	54.53	29.5925	13.7118	0.463355	FALSE	1488	0.237037	0	7	2	2	0	2	7	9	-0.783963	-1.49796	-0.377863	0.0941989	0	0.159184	0.138267	-0.6	0.152361	0.0996117	0.0444444	0.0746959
Pleckstrin-B2	Nontoxin	Nontoxin	27.82	50.47	42.27	37.59	28.2	30.77	59.8	36.1	39.1275	11.3044	0.288912	FALSE	663	0.125	0	1	1	1	0	1	1	2	-1.49796	-1.16221	-1.16221	0	0	-0.428571	0.131579				0	-0.0640732
PleckstrinJ1	Nontoxin	Nontoxin	21.75	43.09	24.62	35.73	28.39	29.71	42.68	30.1	32.0087	7.85926	0.245535	FALSE	450	0.125	0	1	0	0	0	0	1	1	-1.16221		-1.16221	0	0	-0.428571	0.131579				0	-0.0640732
PLIOMethyltransferase	Nontoxin	Nontoxin	6.72	17.51	7.57	15.17	8.98	15.29	18.84	14.29	13.0463	4.64649	0.356156	FALSE	1077	0.125	0	2	0	0	0	0	2	2	-1.49796		-1.49796	0.54902		0.6		0.6		0.666667	0	-0.0640732
PMP-22	Nontoxin	Nontoxin	89.29	80.11	67.73	134.75	41.69	65.83	103.58	119.51	87.8113	30.5469	0.34787	FALSE	570	0.435	0	4	1	1	0	1	4	5	1.46133	1.4737	1.1537	0.114167	-0.333333	0.136842	0.145257	0.4	0.281592	-0.433916	0.367744	0.18526
PMP-4	Nontoxin	Nontoxin	15.16	21.75	18.78	17.23	18.42	17.79	31.19	15.63	19.4937	5.14494	0.263927	FALSE	639	0.19375	0	2	2	2	0	2	2	4	-1.11717	-1.49796	-0.330104	0.196858	0	0.3	0.555556	-0.132467	0.131579	0.666667	0.0192308	0.0294269
PMP34	Nontoxin	Nontoxin	74.12	96.72	135.44	118.58	56.75	99.72	108.28	116.31	100.74	25.3055	0.251196	FALSE	924	0.216667	0	5	2	2	0	2	5	7	-0.990304	-1.49796	-0.525245	-0.0946914	-0.0833332	0.309091	-0.112165	-0.311688	-0.0618183	-0.119192	-0.0367347	0.00870341
PMRPPOP5	Nontoxin	Nontoxin	23.22	13.7	30.19	12.58	16.38	10.96	27	14.65	18.585	7.22477	0.388742	FALSE	498	0.216667	0	2	1	1	0	1	2	3	-0.814758	0.649981	-1.49796	0.0860217	0	-0.428571	0.210526		0.368421	0	0.111111	0.168667
PNDSOR1	Nontoxin	Nontoxin	16.5	28.6	46.37	26.33	28.95	39.15	40.11	27.77	31.7225	9.51637	0.299988	FALSE	1515	0.281771	0	9	7	7	0	7	9	16	-0.256365	-1.36612	0.682974	0.090057	-0.0424242	0.198496	0.235692	-0.358441	0.0611787	-0.0822222	0.109722	0.119404
poly-rC-2	Nontoxin	Nontoxin	321.66	714.61	350.67	462.64	289.31	386.16	605	671.84	475.236	166.714	0.350803	FALSE	1044	0.161111	0	3	0	0	0	0	3	3	-1.34917		-1.34917	-0.031746	-0.111111	-0.428571	0.131579	-0.428571	0.131579		0.0555557	-0.0240674
PolyABinding1	Nontoxin	Nontoxin	391.71	539.17	282.3	411.44	211.19	223.88	428.25	833.96	415.238	202.608	0.487933	FALSE	1911	0.125	0	1	0	0	0	0	1	1	-1.16221		-1.16221	-0.210526			-0.0961538		-0.0961538	-0.4	0	0.0989399
PolyABinding2B	Nontoxin	Nontoxin	39.67	45.31	22.92	73.87	62.48	95.21	77.28	58.15	59.3612	23.1179	0.389444	FALSE	396	0.25	0	5	4	4	0	4	5	9	-0.625986	-1.11717	-0.0696093	-0.168298	-0.277778	-0.593073	-0.0802308	-0.164046	-0.0721269	-0.333333	-0.0018093	0.000428433
PolyABindingInt2	Nontoxin	Nontoxin	20.09	43.63	23.53	19.69	12.83	12.14	28.44	28.48	23.6037	10.1656	0.430678	FALSE	372	0.233333	0	2	0	0	0	0	2	2	-0.57783		-0.57783	0.173428	0	0.6	0.172414	-0.272727	0.151997	0.333334	0.011905	0.201885
PolyAPol-a	Nontoxin	Nontoxin	16.25	18.33	30.15	16.86	12.95	16.58	32.45	19.91	20.435	7.0166	0.343362	FALSE	2223	0.125	0	2	0	0	0	0	2	2	-1.49796		-1.49796	-0.210526			-0.0961538		-0.0961538	-0.4	0	0.0989399
PolyglutamineBinding1	Nontoxin	Nontoxin	4.91	18.22	10.07	18.04	11.04	30.04	11.38	13.03	14.5912	7.58998	0.520174	FALSE	618	0.355311	0	3	0	0	0	0	3	3	0.486378		0.486378	0.204962	0.473684		-0.076923	0.536842	0.372895	-0.4	0.297716	0.193057
PolypyrimidineBinding1	Nontoxin	Nontoxin	12.41	18.17	26.98	12.01	16.62	19.25	35.05	20.41	20.1125	7.67253	0.381481	FALSE	1671	0.391666	0	1	1	1	0	1	1	2	0.766969	0.155746	1.03439	-0.0580189	0		0.204082	-1	-0.18205	-0.153846	-0.0079365	0.209251
PP-1B	Nontoxin	Nontoxin	9.54	22.53	14.02	9.39	7.83	14.53	14.51	13.19	13.1925	4.59743	0.348488	FALSE	1164	0.179167	0	1	1	1	0	1	1	2	-1.03789	-1.16221	-0.448318	0.335579		0.6	0.172414	0.6	0.172414	0.333334	0.0833335	0.141876
PPAR-g1	Nontoxin	Nontoxin	82.09	117	118.41	174.13	110.03	189.33	199.34	97.68	136.001	44.7685	0.329177	FALSE	3342	0.139717	0	4	3	3	0	3	4	7	-1.58916	-1.35784	-1.34889	-0.0350702	-1		-0.4	0.0666667	-0.00961535	0.0266668	-0.0186365	-0.00155822
PPCTI-A	Nontoxin	Nontoxin	774.97	987.24	1025.01	1195.28	678.05	877.58	864.76	1413.14	977.004	236.928	0.242504	FALSE
PPCTI-C	Nontoxin	Nontoxin	8.61	14.69	24.13	9.73	20.17	21.29	19.25	9.83	15.9625	6.04426	0.378653	FALSE	642	0.117424	0	4	0	0	0	0	4	4	-0.609287		-0.609287					-1	0.0769231	-0.4	0.130324	-1.56126e-17
PPCTI-FKBP1A	Nontoxin	Nontoxin	47.37	79.83	38.63	50.79	36.27	49.11	40.75	59.16	50.2387	14.066	0.279983	FALSE	327	0.125	0	1	0	0	0	0	1	1	-1.16221		-1.16221	0.54902		0.6		0.6		0.666667	0	-0.0640732
PPCTI-FKBP1B	Nontoxin	Nontoxin	25.84	48.42	15.17	6.09	13.3	13.18	14.05	19.4	19.4313	13.0011	0.669081	FALSE	327	0.325	0	1	0	0	0	0	1	1	0.155746		0.155746	0.465116			0.454545		0.454545	0.4	0.333333	0.571429
PPCTI-FKBP2	Nontoxin	Nontoxin	262.36	205.4	215.59	389.11	149.78	267.91	226.4	271.43	248.498	69.7347	0.280625	FALSE	426	0.125	0	1	0	0	0	0	1	1	-1.16221		-1.16221	-0.210526			-0.0961538		-0.0961538	-0.4	0	0.0989399
PPCTI-FKBP8	Nontoxin	Nontoxin	35.83	48.87	37.43	48.01	35.59	40.2	55.8	46.91	43.58	7.37927	0.169327	FALSE	1224	0.272222	0	9	0	0	0	0	9	9	-0.355166		-0.355166	0.363859		0.92	0.211456	0.92	0.211456	0.114286	0.290123	0.152963
PPCTI-FKBP9	Nontoxin	Nontoxin	54.16	64.27	73.98	51.95	44.78	29.6	92.94	64.06	59.4675	19.1522	0.322062	FALSE
PPCTI-H	Nontoxin	Nontoxin	40.45	82.46	56.14	36.16	59.22	64.51	87.02	102.21	66.0212	23.0297	0.348822	FALSE	534	0.261111	0	3	0	0	0	0	3	3	-0.387226		-0.387226	0.133214	0		0.451923	-0.714286	0.0951417	0.3	0.0666667	0.238573
PRA1-3	Nontoxin	Nontoxin	28.57	64.78	33.58	32.74	37.55	40.08	64.74	27.94	41.2475	15.0698	0.36535	FALSE	567	0.293055	0	5	1	1	0	1	5	6	-0.0943861	-0.448318	0.0397434	0.263162	0	0.733333	0.295127	0.557895	0.223585	-0.0888888	0.266111	0.250201
pre-mRNAp14	Nontoxin	Nontoxin	60.98	120.19	129.78	79.55	63.02	78.89	126.43	128.01	98.3562	30.4956	0.310053	FALSE	378	0.125	0	1	0	0	0	0	1	1	-1.16221		-1.16221	-0.210526			-0.0961538		-0.0961538	-0.4	0	0.0989399
Prefoldin1	Nontoxin	Nontoxin	254.09	354.35	401.68	234.32	171.35	226.44	360.83	326.44	291.188	80.5821	0.276736	FALSE	369	0.125	0	1	0	0	0	0	1	1	-1.16221		-1.16221	-0.210526			-0.0961538		-0.0961538	-0.4	0	0.0989399
Prefoldin3	Nontoxin	Nontoxin	29.87	93.24	54.46	74.57	58.77	100.34	80.22	79.26	71.3413	22.7889	0.319435	FALSE	612	0.1	0	1	1	1	0	1	1	2	-0.720697	-0.720697							-0.0961538		-0.0961538	-0.0961538
Prefoldin4	Nontoxin	Nontoxin	61.44	70.72	115.17	56.33	37.04	39.78	102.11	102.31	73.1125	29.9954	0.410264	FALSE	393	0.2625	0	2	0	0	0	0	2	2	-0.330104		-0.330104	0.119206	0	-0.350649	0.131579	0	0.555556	0.666667	0.0384615	0.122927
Prefoldin5	Nontoxin	Nontoxin	77.79	88.48	103.35	58.59	31.41	45.7	123.3	149.88	84.8125	39.9834	0.471433	FALSE	468	0.125	0	2	0	0	0	0	2	2	-1.49796		-1.49796	-0.105263	0	-0.428571	0.0177126		-0.0961538	-0.4	0	0.0174334
Prefoldin6	Nontoxin	Nontoxin	60.12	109.73	53.21	123.64	73.41	84.04	60.75	106.09	83.8738	26.4364	0.315193	FALSE	381	0.362637	0	1	0	0	0	0	1	1	0.381009		0.381009	0.451613			0.4		0.454545	0.4	0.291028	0.538462
PRELI	Nontoxin	Nontoxin	145.74	164.53	153.69	146.39	122.74	145.47	164.78	166.25	151.199	14.5924	0.0965112	FALSE	630	0.225	0	2	0	0	0	0	2	2	-0.648609		-0.648609	-0.12799	0	-0.428571	-0.136182		0.0381301	-0.2	-0.0333333	0.0824216
premrnaSF19	Nontoxin	Nontoxin	26.95	48.72	44.93	30.91	33.05	45.22	40.11	33.74	37.9537	7.87879	0.207589	FALSE	1515	0.361667	0	13	2	2	0	2	13	15	0.783834	-0.330104	0.966909	0.0960863	-0.0277778	0.162987	0.125806	0.0662337	0.0777555	0.0554637	0.0796961	0.0728137
PrenRab1	Nontoxin	Nontoxin	81.35	91.14	126.8	138.89	97.63	109.91	188.23	83.27	114.652	36.0707	0.314609	FALSE	582	0.258333	0	2	1	1	0	1	2	3	-0.413947	-1.16221	0.200738	0.324673	0.333334	0.6	0.561358	0.215038	-0.022316	0.555555	-0.0555557	-0.0137444
Presenilin2	Nontoxin	Nontoxin	47.26	35.81	46.66	29.24	20.33	31.26	43.6	49.81	37.9963	10.4933	0.276167	FALSE	1392	0.168333	0	3	2	2	0	2	3	5	-1.45474	-1.03789	-1.34917	-0.0353556	0	-0.428571	0.0568199		0.0381301	-0.2	0.0666668	0.165892
PRNT1	Nontoxin	Nontoxin	4.84	23.61	8.32	9.17	5.46	28.39	11.95	5.63	12.1712	8.93914	0.734447	FALSE	2307	0.243056	0	4	2	2	0	2	4	6	-0.662291	1.05009	-1.54972	-0.0537693	0.333334	-0.350649	-0.0911346	0.6	0.0956295	-0.292308	0.031746	0.138298
Profilin1	Nontoxin	Nontoxin	95.62	80.07	11.08	146.32	138.02	223.27	168.74	144.8	125.99	63.7384	0.505901	FALSE	423	0.484848	0	1	0	0	0	0	1	1	1.13811		1.13811					-0.272727	0.742188	0.666667	0.506958	0.625
Profilin2	Nontoxin	Nontoxin	68.87	124.55	61.36	53.38	30.19	47.04	152.13	84.61	77.7662	41.259	0.530551	FALSE
Prohibitin	Nontoxin	Nontoxin	143.76	156.68	251.67	61.71	105.44	95.33	209.49	183.54	150.952	63.0721	0.417827	FALSE	819	0.328571	0	7	0	0	0	0	7	7	0.318092		0.318092	0.427512	0	0.733333	0.526982	-0.733333	0.434655	0.539927	0.146032	0.382804
Prohibitin2	Nontoxin	Nontoxin	38.42	89.13	90.95	68.8	53.21	83.32	97.96	74.58	74.5463	20.3551	0.273053	FALSE	906	0.125	0	2	0	0	0	0	2	2	-1.49796		-1.49796	-0.210526			-0.0961538		-0.0961538	-0.4	0	0.0989399
Prolactin	Nontoxin	Nontoxin	24.24	70.97	45.63	57.45	42.64	64.33	45.82	31.83	47.8637	15.8048	0.330205	FALSE	1260	0.2725	0	7	3	3	0	3	7	10	-0.357226	-1.05524	0.0675482	0.203474	0	0.257143	0.295358	-0.0202596	0.250776	0.136325	0.193555	0.288793
Prolyl-tRNA1	Nontoxin	Nontoxin	31.82	27.26	42.2	33.27	16.5	53.15	53.72	31.47	36.1737	12.8085	0.354083	FALSE	537	0.458333	0	1	0	0	0	0	1	1	1.03439		1.03439	0.258065	-0.5	-1	0.25	0.473684	0.742188		0.533333	0.289277
Promethin1	Nontoxin	Nontoxin	21.61	25.38	25.95	14.49	33.02	21.39	27.46	30.22	24.94	5.77708	0.231639	FALSE	444	0.286111	0	4	2	2	0	2	4	6	-0.173262	-1.03789	0.396744	0.178496	-0.166667	-0.291428	0.223955	0.309091	0.39319	0.166667	0.225634	0.202745
ProphobilinogenDeaminase	Nontoxin	Nontoxin	30.48	53.14	27.74	35.41	34.71	35.47	28.7	34.2	34.9812	7.95521	0.227414	FALSE	1059	0.35	0	4	1	1	0	1	4	5	0.53183	1.52862	0.0290785	0.282683		0.866667	0.296885	0.866667	0.296885	-0.338462	0.423333	0.25753
ProRich15	Nontoxin	Nontoxin	40.61	60.05	74.56	13.47	51.89	47.62	65.89	28.69	47.8475	20.0199	0.418412	FALSE	324	0.479166	0	0	2	2	0	2	0	2	1.51015	1.51015		0.945497	1	0.6	1	0.6	1	0.833333	0.375	0.644639
ProRichNRC2	Nontoxin	Nontoxin	28.77	47.23	41.03	25.73	28.03	30.59	53.73	51.9	38.3762	11.4887	0.299371	FALSE
ProstaglandinESyn3	Nontoxin	Nontoxin	85.42	147.55	100.43	103.94	82.01	103.97	171.87	146.45	117.705	33.0451	0.280745	FALSE	483	0.2625	0	2	0	0	0	0	2	2	-0.330104		-0.330104	0.114249	0.2	0.473684	0.323017	-0.428571	0.0177126	-0.4	0.208334	0.156656
ProstaglandinRed2	Nontoxin	Nontoxin	41.08	38.91	50.55	32.22	26.79	47.16	55.09	49.96	42.72	9.7664	0.228614	FALSE	1044	0.125	0	1	0	0	0	0	1	1	-1.16221		-1.16221	-0.210526			-0.0961538		-0.0961538	-0.4	0	0.0989399
Prot26S1	Nontoxin	Nontoxin	23.27	57.83	29.97	32.7	33.92	38.87	67.59	22.44	38.3237	16.1997	0.422707	FALSE	2871	0.289583	0	21	3	3	0	3	21	24	-0.159452	-0.627713	-0.0555209	0.152759	0.0333334	0.0120595	0.0875319	-0.0117747	0.145466	0.0270764	0.0587628	0.0443585
Protease6B	Nontoxin	Nontoxin	35.68	49.25	49.7	37.83	35.77	54.89	75.96	21.92	45.125	16.2679	0.360507	FALSE	1257	0.227778	0	2	1	1	0	1	2	3	-0.707875	-1.16221	-0.188546	0.161799	0.5	0.428571	0.0200166	0.428571	0.121083	-0.4	0.0333334	0.00717
Protease8	Nontoxin	Nontoxin	71.55	136.36	147.28	71.93	84.38	95.09	209.27	104.42	115.035	47.1683	0.410034	FALSE	1221	0.125	0	1	0	0	0	0	1	1	-1.16221		-1.16221	-0.210526			-0.0961538		-0.0961538	-0.4	0	0.0989399
Proteasome-6A	Nontoxin	Nontoxin	90.46	99.84	167.17	80.44	82.21	94.75	170.45	80.47	108.224	38.0471	0.35156	FALSE	1269	0.231944	0	6	0	0	0	0	6	6	-0.788493		-0.788493	0.0265699	-0.0666666	-0.0424058	0.157436	-0.090909	0.0899418	-0.2	0.116667	0.0434349
Proteasome-a1	Nontoxin	Nontoxin	69.82	122.09	150.2	85.32	80.6	95.8	181.09	77.09	107.751	39.9073	0.370365	FALSE	786	0.125	0	1	0	0	0	0	1	1	-1.16221		-1.16221	0	0			-0.428571	0.131579		0	-0.0640732
Proteasome-a2	Nontoxin	Nontoxin	363.93	355.95	560.39	119.59	279.21	197.12	793.61	280.51	368.789	215.393	0.584056	FALSE
Proteasome-a3	Nontoxin	Nontoxin	150.07	246.77	328.49	141.12	181.39	283.98	357.12	145.11	229.256	86.9385	0.37922	FALSE	768	0.161111	0	2	1	1	0	1	2	3	-1.34917	-1.16221	-1.03789	0.0407123	0	-0.428571	0.151997	-0.428571	0.151997	8.88178e-17	0.0555557	0.0732265
Proteasome-a4	Nontoxin	Nontoxin	145.13	186.93	253	134.67	116.92	158.34	237.26	166.78	174.879	48.3139	0.276271	FALSE	786	0.311667	0	5	0	0	0	0	5	5	0.112645		0.112645	0.2244	0.5	0	0.226001	1	-0.0210948	0.194872	-0.034127	0.114275
Proteasome-a5	Nontoxin	Nontoxin	95.62	188.83	230.18	115.92	154.51	192.08	289.13	87.62	169.236	69.8309	0.412624	FALSE
Proteasome-a6	Nontoxin	Nontoxin	126.91	271.68	235.4	191.07	165.37	238.55	316.89	183.68	216.194	61.3306	0.283684	FALSE	741	0.125	0	2	0	0	0	0	2	2	-1.49796		-1.49796	0	0	-0.428571	0.131579				0	-0.0640732
Proteasome-b1	Nontoxin	Nontoxin	113.9	164.21	244.81	124.67	158.48	185.2	407.98	152.7	193.994	95.262	0.491057	FALSE	720	0.243056	0	4	2	2	0	2	4	6	-0.662291	0.660801	-1.31182	0.0474224	-0.0833332	-0.0642855	0.0465853	-0.132467	0.061865	-0.0957263	0.0509259	0.0384619
Proteasome-b2	Nontoxin	Nontoxin	147.93	371.11	336.21	228.26	219.36	309.92	385.27	183.05	272.639	89.6024	0.328649	FALSE	606	0.304762	0	7	0	0	0	0	7	7	0.03971		0.03971	0.0227727	-0.188889	-0.662338	0.223567	-0.191688	0.0671874	0.233333	0.0811792	0.0877295
Proteasome-b3	Nontoxin	Nontoxin	219.16	372.97	457.64	152.8	243.23	176.42	503.6	305.74	303.945	129.964	0.42759	FALSE	618	0.125	0	2	1	1	0	1	2	3	-1.69654	-1.16221	-1.49796	0.112831	0	0.0857145	0.0177126	0.6	-0.0961538	0.133333	0	-0.0097355
Proteasome-b5	Nontoxin	Nontoxin	83.31	59.39	15.72	185.78	115.18	311.55	221.43	126.96	139.915	95.6925	0.683933	TRUE	798	0.347403	0	12	2	2	0	2	12	14	0.494437	1.46689	0.201775					0.32	0.134517	-0.197669	0.0774643	0.0903061
Proteasome-b7	Nontoxin	Nontoxin	125.55	287.93	155.3	219.43	166.64	331.67	250.48	159	212	72.8768	0.343759	FALSE	843	0.326438	0	16	1	1	0	1	16	17	0.289032	-1.0535	0.436047	0.230769	0.064809		-0.0145085	0.152445	0.252436	-0.0347106	0.132671	0.0570896
Proteasome11-1	Nontoxin	Nontoxin	0	0	0	13.67	0	20.06	0	0	4.21625	7.99159	1.89543	TRUE
Proteasome13	Nontoxin	Nontoxin	23.26	48.52	46.86	28.31	33.33	39.54	77.82	21.7	39.9175	18.3086	0.45866	FALSE	1131	0.179167	0	1	1	1	0	1	1	2	-1.03789	-1.16221	-0.448318	0.0610685	0	-0.428571	0.151997		0.172414	8.88178e-17	0.0833335	0.141876
Proteasome14	Nontoxin	Nontoxin	27.3	66.21	154.37	36.5	80.69	97.3	184.92	24.63	83.99	59.326	0.706346	FALSE	933	0.191667	0	2	1	1	0	1	2	3	-1.05524	-1.16221	-0.648609	-0.224318	0		-0.148077	-0.428571	-0.159323	-0.7	-0.0666667	-0.0112821
Proteasome7-2	Nontoxin	Nontoxin	56.86	77.86	49.43	96.67	55.68	112.13	116.47	63.65	78.5938	26.6131	0.338617	FALSE	1302	0.258974	0	13	0	0	0	0	13	13	-0.54248		-0.54248	0.0119357	-0.1	0.285714	-0.0781881	0.0952382	0.0362386	-0.19596	0.0672584	0.0214063
ProteasomeAct1	Nontoxin	Nontoxin	36.04	264.77	35.9	80.23	51.73	116.66	56.56	84.52	90.8013	75.4008	0.830394	FALSE	762	0.272222	0	4	2	2	0	2	4	6	-0.331013	-1.49796	0.461626	0.116335	0.25	0.0857145	0.0972346	0.342857	0.160846	-0.145454	0.0861111	0.0416536
ProteasomeAct2	Nontoxin	Nontoxin	29.7	217.14	40.39	54.7	46.3	92.27	54.93	65.12	75.0687	60.342	0.803824	FALSE	723	0.209722	0	5	1	1	0	1	5	6	-1.0409	-1.16221	-0.816852	-0.0365265	0.133333	-0.428571	0.0769231	-0.203007	-0.115521	-0.266667	-0.0654762	-0.0357387
ProteasomeActivator-3	Nontoxin	Nontoxin	24.19	31.52	60.62	13.04	24.41	22.96	36.9	21.09	29.3413	14.4698	0.493156	FALSE	765	0.125	0	1	0	0	0	0	1	1	-1.16221		-1.16221	0.54902		0.6		0.6		0.666667	0	-0.0640732
ProteasomeActivator-3_2	Nontoxin	Nontoxin	0	0	0	29.92	0	23.8	0	0	6.715	12.5409	1.86759	TRUE
ProteasomeB4	Nontoxin	Nontoxin	121.71	174.66	66.08	195.47	150.19	246.26	153.87	143.14	156.422	52.8023	0.337562	FALSE	771	0.262626	0	7	2	2	0	2	7	9	-0.543235	-1.17552	-0.207741					0.158766	0.115905	0.358975	0.0190536	0.0624338
ProteasomeChap1	Nontoxin	Nontoxin	17.71	27.01	40.46	19.11	27.74	20.97	35.28	19.56	25.98	8.29996	0.319475	FALSE	849	0.268055	0	2	4	4	0	4	2	6	-0.378339	-0.165568	-0.57783	0.348576	-0.0666666	0.379699	0.335115	0.0952382	0.267178	1	0.0944445	0.0248728
ProteasomeChap3	Nontoxin	Nontoxin	12.75	31.93	24.97	19.19	21.42	22.74	33.31	15.98	22.7862	7.18112	0.315151	FALSE	369	0.168333	0	3	2	2	0	2	3	5	-1.45474	-1.49796	-1.0018	0.138847	-0.111111	0.285714	0.0177126	-0.0714282	0.0746458	0.3	0.0333334	-0.0210675
ProteasomeDSS1	Nontoxin	Nontoxin	623.68	1247.85	1203.74	414.1	491.2	470.35	1573.22	783.18	850.915	435.074	0.511301	FALSE
ProteasomeInh-PI31	Nontoxin	Nontoxin	18.7	114.37	25	62.26	31.68	133.81	34.9	35.23	56.9937	43.6104	0.765179	FALSE	831	0.257576	0	10	4	4	0	4	10	14	-0.385708	-1.09074	0.0385248					-0.182289	0.0895052	-0.362238	0.148549	-0.0247253
ProteasomeMat	Nontoxin	Nontoxin	357.53	555.45	719.18	361.18	435.15	442.09	916.82	503.41	536.351	193.251	0.360307	FALSE	426	0.125	0	0	1	1	0	1	0	1	-1.16221	-1.16221		0.54902		0.6		0.6		0.666667	0	-0.0640732
ProteasomeRed9	Nontoxin	Nontoxin	27.96	29.6	17.75	53.41	18.13	28.35	41.06	43.77	32.5037	12.5801	0.387036	FALSE	618	0.31685	0	2	4	4	0	4	2	6	0.141597	-0.190726	0.629745	0.404922	-0.0958645		0.555556	0.129023	0.468785	0.555556	0.221818	0.241896
ProteasomeReg4	Nontoxin	Nontoxin	70.49	96.61	47.75	132.66	100.89	166.05	183.12	79.06	109.579	47.2922	0.431582	FALSE	1131	0.279609	0	9	0	0	0	0	9	9	-0.297594		-0.297594	0.116723	-0.357143		-0.0933332	0.121212	-0.0214918	0.141667	-0.020777	0.0590612
ProteasomeReg6	Nontoxin	Nontoxin	17.11	72.07	30.88	36.38	33.74	47.12	49.27	23.83	38.8	17.2149	0.443684	FALSE	1170	0.2625	0	2	0	0	0	0	2	2	-0.330104		-0.330104	0.051948	-0.25	-1	0.25	0	0.343568		0.208334	0.0751499
ProteasomeY	Nontoxin	Nontoxin	201.45	141.42	62.17	207.79	187.44	381.83	215.46	311.32	213.61	97.7319	0.457525	FALSE	702	0.287879	0	4	1	1	0	1	4	5	-0.217438	-0.912045	0.10117					0.257143	0.222337	-0.0787878	0.200599	0.145714
Proteolipid2	Nontoxin	Nontoxin	18.53	36.85	44.91	34.22	32.54	32.74	75.07	44.67	39.9413	16.4249	0.411227	FALSE	453	0.2625	0	2	0	0	0	0	2	2	-0.330104		-0.330104	0.169247	-0.333333	0.163636	-0.231214	0.163636	-0.231214	0.333334	-0.0555555	-0.0630745
Proteosome12	Nontoxin	Nontoxin	40.76	78.46	87.63	57.67	61.49	77.85	111.26	44.62	69.9675	23.5128	0.336053	FALSE	1371	0.325	0	5	0	0	0	0	5	5	0.258449		0.258449	-0.0083013	0	0.6	0.0645391	0.045195	-0.0206068	-0.555555	0.178586	0.035384
ProtRed	Nontoxin	Nontoxin	22	42.04	34.32	40.32	23.86	33.26	50.95	43.24	36.2487	9.88707	0.272756	FALSE	1656	0.25119	0	6	1	1	0	1	6	7	-0.58665	-1.16221	-0.331013	0.113334	-0.0833332	-0.204762	0.0552042	0.124675	0.117061	0.133333	0.0192983	-0.0027822
Prp31	Nontoxin	Nontoxin	15.03	44.22	26.1	12.36	25.65	16.86	40.06	23.72	25.5	11.4824	0.450289	FALSE	1500	0.316666	1	4	0	0	1	1	4	5	0.167321	-1.16221	0.656272	0.105995	-0.25	-0.0714282	-0.003608	-0.357143	-0.111312	0.316667	-0.0767506	-0.043363
PRPPSyn2	Nontoxin	Nontoxin	11.53	19.06	14.83	22.04	12.16	19.4	18.41	23.3	17.5912	4.3481	0.247174	FALSE	1110	0.25	0	9	0	0	0	0	9	9	-0.625986		-0.625986	0.0149782	-0.208333	0.250909	0.0332353	-0.262338	-0.00229417	-0.0287878	0.0362694	0.0704112
PTP-b	Nontoxin	Nontoxin	13.37	23.34	14.62	21.07	13.78	33.2	20.6	12.48	19.0575	7.05017	0.369942	FALSE	816	0.207291	0	5	3	3	0	3	5	8	-1.12539	-1.34917	-0.725725	0.262261	0.309524	-0.428571	0.0556681	0.238095	0.40481	-0.4	0.129167	0.0454787
PurinePhosphorylase	Nontoxin	Nontoxin	2.85	7.44	10.55	34.45	5.87	9.07	11.22	5.87	10.915	9.89625	0.906665	FALSE	882	0.320055	0	8	0	0	0	0	8	8	0.187113		0.187113		-0.119048		0.122768		0.130843		0.128744	0.128744
PyrDehE1a	Nontoxin	Nontoxin	31.9	74.32	52.46	41.15	24.01	42.79	43.53	39.91	43.7587	14.9425	0.341475	FALSE	1200	0.20625	0	1	3	3	0	3	1	4	-0.987408	-1.0018	-0.448318	-0.0459068	-0.111111	-0.428571	0.0242597	-0.428571	0.0848546	-0.2	0.0476193	0.0528025
PyrrolineCR2	Nontoxin	Nontoxin	40.52	38.67	34.31	16.26	32.33	21.48	24.23	16.48	28.035	9.68368	0.345414	FALSE	939	0.386111	0	1	2	2	0	2	1	3	0.815206	1.82865	-1.16221	0.281952	0	-0.6	0.298415	0.257143	0.546733	1.11022e-16	0.32963	0.304927
PyruvateDehydroKin	Nontoxin	Nontoxin	13.82	17.95	16.29	11.72	12.16	11.05	19.78	14.95	14.715	3.12562	0.212411	FALSE	1236	0.41	0	5	0	0	0	0	5	5	1.18795		1.18795	0.0959241	0	0.333333	0.401678	-1	-0.168915	-0.138461	0.138316	0.112458
PyruvateDH	Nontoxin	Nontoxin	35.22	48.93	41.36	34.94	29.87	39.92	45.67	29.38	38.1613	7.07667	0.185441	FALSE	1098	0.125	0	5	0	0	0	0	5	5	-1.9286		-1.9286	-0.0421052	0	-0.428571	0.0860324		-0.0961538	-0.4	0	-0.0314706
PyruvateDHKinase-3	Nontoxin	Nontoxin	27.88	35.06	39.78	23.02	29.94	26.76	35.48	23.38	30.1625	6.0782	0.201515	FALSE	1221	0.525	0	1	0	0	0	0	1	1	1.4737		1.4737	0.425	0.666667	-0.272727	-0.231214	0.6	0.75431	1.11022e-16	0.111111	0.188614
Qil1	Nontoxin	Nontoxin	40.73	60.61	56.07	34.57	27.27	37.41	62.48	20.15	42.4112	15.7419	0.371173	FALSE	336	0.125	0	0	2	2	0	2	0	2	-1.49796	-1.49796		-0.210526			-0.0961538		-0.0961538	-0.4	0	0.0989399
R-Ras2	Nontoxin	Nontoxin	19.53	24.93	17.02	15.42	15.59	24.01	29.58	21.68	20.97	5.02824	0.239783	FALSE	612	0.296703	0	3	0	0	0	0	3	3	-0.0720308		-0.0720308	0.257841	-0.272727		-0.0444443	0.390476	-0.0202429	0.333334	0.191179	-0.11223
Rab-10	Nontoxin	Nontoxin	47.3	101.79	74.96	67.34	78.41	88.85	85.98	61.21	75.73	17.128	0.226172	FALSE	603	0.458333	0	1	0	0	0	0	1	1	1.03439		1.03439	-0.0326531	0	0	0.136187	-0.272727	-0.231214	1.11022e-16	-0.047619	0.0478605
Rab-18	Nontoxin	Nontoxin	102.4	154.83	136.24	99.39	114.32	105.35	144.45	117.28	121.782	20.8329	0.171066	FALSE	618	0.233333	0	1	0	0	0	0	1	1	-0.448318		-0.448318	0	0			-1	0.25		0	-0.132075
Rab-1A-1	Nontoxin	Nontoxin	37.27	60.37	27.61	36.35	31.22	62.59	75.22	26.44	44.6337	18.6286	0.417365	FALSE	606	0.295833	0	8	0	0	0	0	8	8	-0.0661811		-0.0661811	0.10422	0.3	-0.27619	0.115843	0.577143	0.0236697	-0.125926	0.0229168	0.0261919
Rab-1A-2	Nontoxin	Nontoxin	133.01	179.43	193.8	130.87	158.08	177.27	192.44	150.36	164.408	25.0394	0.152301	FALSE
Rab-1b	Nontoxin	Nontoxin	43.09	59.39	72.62	43.65	48	45.75	77.11	65.81	56.9275	13.685	0.240394	FALSE
Rab-28	Nontoxin	Nontoxin	92.41	97.09	140.36	112.02	101.26	135.23	135.13	99.2	114.088	19.746	0.173077	FALSE	672	0.125	0	2	0	0	0	0	2	2	-1.49796		-1.49796	0.54902		0.6		0.6		0.666667	0	-0.0640732
Rab-2A	Nontoxin	Nontoxin	88.08	152.23	190.13	149.32	139.47	175.43	193.29	109.43	149.673	37.2762	0.249052	FALSE	639	0.233333	0	1	0	0	0	0	1	1	-0.448318		-0.448318	0	0	-1	0.25				0	-0.132075
Rab-4b	Nontoxin	Nontoxin	15.78	20.74	10.93	16.11	14.19	20.89	12.68	8.56	14.985	4.36799	0.291491	FALSE	642	0.2625	0	2	0	0	0	0	2	2	-0.330104		-0.330104	0.219512	0.1	0.473684	0.742188	-0.428571	0.131579		0.208334	0.0751499
Rab11A-1	Nontoxin	Nontoxin	60.86	94.39	65.7	64.15	48.76	95.19	101.67	69.54	75.0325	19.3368	0.257713	FALSE	654	0.325	0	1	0	0	0	0	1	1	0.155746		0.155746	0.185286		0.6	0.172414	0.6	0.172414	-0.181818	0.333333	0.0659034
RAB11a-2	Nontoxin	Nontoxin	11.54	44.25	21.31	33.06	29.84	33.3	31.6	12.05	27.1188	11.3262	0.417652	FALSE	654	0.235	0	5	0	0	0	0	5	5	-0.725725		-0.725725	0.177348	0	0.163308	-0.0919487	0.442424	0.0692797	0.344444	-0.0238094	-0.0800595
Rab13	Nontoxin	Nontoxin	23.07	21.21	25.81	46.12	8.17	20.57	55.27	42.54	30.345	15.8702	0.522993	FALSE	603	0.125	0	2	1	1	0	1	2	3	-1.69654	-1.16221	-1.49796	-0.0701753	0	-0.428571	0.0556681		-0.0961538	-0.4	0	-0.0097355
Rab14	Nontoxin	Nontoxin	29.04	71.26	33.26	36.79	33.17	42.04	57.97	32.24	41.9712	14.9088	0.355214	FALSE
Rab20B	Nontoxin	Nontoxin	5.08	13.44	4.18	15.66	3.66	7.97	8.98	14.99	9.245	4.8938	0.529345	FALSE	837	0.252083	0	4	1	1	0	1	4	5	-1.05524	-1.16221	-0.648609	0.17066	0	0.463204	-0.0392206	0.65	-0.0939406	0.255556	0.0555555	-0.0867793
Rab24	Nontoxin	Nontoxin	34.09	55.85	28.69	36.93	33.98	48.03	54.15	30.15	40.2337	10.83	0.269177	FALSE	612	0.385416	0	2	2	2	0	2	2	4	0.872546	1.05009	0.377685	-0.218547	-0.25	-0.214285	-0.0996825	-1.8	-0.0607205	-0.566239	0.0347221	0.230053
Rab27B	Nontoxin	Nontoxin	5.91	13.4	15.88	15.61	10.49	21.8	37.78	34.71	19.4475	11.3521	0.583729	FALSE	657	0.525	0	1	0	0	0	0	1	1	1.4737		1.4737	0.366972	-0.5	-1	0.25	-0.428571	0.742188	1	0.037037	0.55997
Rab3	Nontoxin	Nontoxin	10.64	31.28	25.01	17.86	15.57	19.63	19.67	18.79	19.8063	6.15934	0.31098	FALSE	711	0.294444	0	2	1	1	0	1	2	3	-0.0665776	-1.16221	0.660801	0.153544	0	-0.2	-0.355769	0.6	0.136134	-0.148148	0.0679013	-0.0617419
Rab33A	Nontoxin	Nontoxin	5.63	32.23	9.38	18.77	15.75	22.47	18.89	7.78	16.3625	8.77692	0.536404	FALSE	651	0.10101	0	1	2	2	0	2	1	3	-0.0334055	-0.0334055							-0.2	-1	-0.263158	8.32667e-17
Rab35	Nontoxin	Nontoxin	19.67	39.51	30.35	11.91	24.16	22.88	27.76	20.46	24.5875	8.20268	0.333612	FALSE
Rab5B	Nontoxin	Nontoxin	21.03	36.93	26.24	23.01	27.08	34.72	46.66	22.68	29.7938	8.88889	0.298347	FALSE	645	0.325	0	2	0	0	0	0	2	2	0.200738		0.200738	0.0336134	-0.333333	-0.272727	0.131579	-0.272727	0.131579	0.666667	-0.0666667	0.180523
Rab7a	Nontoxin	Nontoxin	64.51	103.35	99.88	84.46	62.99	122.33	121.56	76.16	91.905	23.5723	0.256486	FALSE	624	0.233333	0	1	0	0	0	0	1	1	-0.448318		-0.448318	0	0			-1	0.25		0	-0.132075
RAB8	Nontoxin	Nontoxin	44	54.37	47.81	46.77	34.99	56.36	68.34	35.61	48.5312	11.0986	0.228689	FALSE	624	0.233333	0	1	0	0	0	0	1	1	-0.448318		-0.448318	-0.210526	0	-0.428571	-0.231214		-0.0961538	-0.4	-0.142857	-0.128487
RabGDPDisInh-a	Nontoxin	Nontoxin	39.24	64.15	45.83	38.39	27.79	47.43	58.8	29.42	43.8813	12.9258	0.294563	FALSE	1344	0.329166	0	5	1	1	0	1	5	6	0.315768	1.4737	-0.124286	0.29565	-0.0666666	0.338961	0.61754	-0.335065	0.341921	0.5	0.258716	0.311487
RabGDPDissInh-b	Nontoxin	Nontoxin	97.85	150.45	59.01	68.38	64.37	100.75	130.12	115.21	98.2675	32.9815	0.335629	FALSE	1347	0.232292	0	15	1	1	0	1	15	16	-0.90372	-1.16221	-0.804893	0.132709	0.154545	0.246548	0.0941462	0.136246	0.0504994	-0.241667	0.0600695	0.010512
RAD51C	Nontoxin	Nontoxin	32.25	34.44	48.82	47.62	30.03	43.65	34.47	33.6	38.11	7.39228	0.193972	FALSE	1110	0.182888	0	5	9	9	0	9	5	14	-1.36012	-1.40793	-0.962656	-0.0731888	0.142857		-0.18	0.154286	0.0408721	-0.173333	0.0273148	0.0745057
Ral-B	Nontoxin	Nontoxin	15.39	24.43	30.5	26	18.79	24.38	41.77	19.25	25.0637	8.25607	0.329403	FALSE
RANBinding	Nontoxin	Nontoxin	31.28	86.48	57.93	52.36	55.61	73.76	53.48	50.43	57.6663	16.4222	0.28478	FALSE	630	0.4	0	2	0	0	0	0	2	2	0.837748		0.837748	0.200509	0	0.428571	0.345871	0	0.162171	-0.4	0.288462	0.123926
Rap-1A	Nontoxin	Nontoxin	36.93	66.81	49.16	33.36	31.39	51.17	65.02	43.61	47.1812	13.5307	0.286782	FALSE	555	0.216667	0	3	0	0	0	0	3	3	-0.814758		-0.814758	0.034632	-0.166667	0.428571	0.555556	-0.619047	0.171053		0.138889	0.0287422
RasGTPBindingA	Nontoxin	Nontoxin	16.67	46.7	26.12	50.42	28.83	43.53	37.65	35.16	35.635	11.3651	0.318931	FALSE	942	0.125	0	1	0	0	0	0	1	1	-1.16221		-1.16221	-0.210526			-0.0961538		-0.0961538	-0.4	0	0.0989399
RasSuppressor-1	Nontoxin	Nontoxin	11.99	34.98	35.55	10.73	13.93	8.58	25.72	20.9	20.2975	10.7993	0.532052	FALSE	834	0.5	0	0	1	1	0	1	0	1	1.30896	1.30896		0.581818	0	1	1	-1	0.25		0.666667	0.387755
rBAT	Nontoxin	Nontoxin	29.73	35.26	20.71	13.74	15.85	19.61	21.7	35.64	24.03	8.46994	0.352474	FALSE	2022	0.168333	0	3	2	2	0	2	3	5	-1.45474	-0.57783	-1.69654	-0.0774608			0.0112733		0.0112733	-0.24	0.0666668	0.198494
rCG21222	Nontoxin	Nontoxin	917.94	2983.36	1405.31	2129.2	1231.2	1944.89	1540.99	1195.23	1668.51	663.495	0.397656	FALSE
rCG21222_2	Nontoxin	Nontoxin	551.76	1381.11	982.53	1140.56	929.13	1111.4	1111.74	902.46	1013.84	240.276	0.236997	FALSE	690	0.258333	0	4	0	0	0	0	4	4	-0.446724		-0.446724	0.182803	0	0.485714	0.19853	0.2	0.0572041	-0.0444443	0.145833	0.0658125
RecBindingCancer	Nontoxin	Nontoxin	133.78	174.16	210.31	165.15	157.22	191.19	302.89	227.29	195.249	52.6876	0.269848	FALSE	642	0.125	0	2	1	1	0	1	2	3	-1.69654	-1.16221	-1.49796	-0.140351	0	-0.428571	-0.0202429		-0.0961538	-0.4	0	0.0446022
ReceptorExpEnh5	Nontoxin	Nontoxin	50.36	88.28	66.66	72.13	54.55	62.04	103.02	109.4	75.805	22.0737	0.291191	FALSE	570	0.125	0	1	0	0	0	0	1	1	-1.16221		-1.16221	0.54902		0.6		0.6		0.666667	0	-0.0640732
Reductase3	Nontoxin	Nontoxin	74.32	178.8	110.78	227.27	73.31	114.02	115.44	116.33	126.284	52.1948	0.413313	FALSE	906	0.221667	0	4	1	1	0	1	4	5	-0.871529	1.30896	-1.54972	-0.0796683	0	-0.214285	0.0148183	-0.272727	-0.0490261	-0.245454	0.0200001	0.0843249
RegG2	Nontoxin	Nontoxin	202.35	277.09	121.27	211.14	166.51	98.04	285.38	339.1	212.61	83.798	0.39414	FALSE	636	0.31875	0	2	2	2	0	2	2	4	0.18047	0.0945699	0.200738	0.244237	0.25	0.333333	0.183243	1	0.406505	-0.266667	0.309343	0.112794
RegNucPre-mRNA-1B	Nontoxin	Nontoxin	27.77	32.65	18.25	43.9	29.98	59.24	79.34	48.53	42.4575	19.7648	0.465519	FALSE	981	0.348485	0	13	0	0	0	0	13	13	0.503884		0.503884					-0.00941733	0.132604	-0.0490028	0.100926	0.0918249
ReninReceptor	Nontoxin	Nontoxin	24.19	36.65	42.94	16.55	26.33	28.42	43.68	30.17	31.1163	9.40739	0.302331	FALSE	1059	0.283333	0	3	3	3	0	3	3	6	-0.204812	0.708323	-1.05524	0.276495	0.233333	-0.0623375	0.137731	0.6	0.488401	0.187879	0.1	0.0718752
RepA32	Nontoxin	Nontoxin	16.64	34.56	27.55	20.57	14.4	19.55	26.71	19.4	22.4225	6.66129	0.29708	FALSE	801	0.383333	0	0	2	2	0	2	0	2	0.696191	0.696191		0.561068		1	0.586207	1	0.586207	8.88178e-17	0.583333	0.514339
Replication-A	Nontoxin	Nontoxin	12.46	43.17	21.61	10.06	15.67	7.94	16.28	17.55	18.0925	11.0196	0.60907	FALSE	360	0.383333	0	1	1	1	0	1	1	2	0.696191	1.52862	-0.448318	1		1	1	1	1	1	0.5	0.274388
RER1	Nontoxin	Nontoxin	128.67	246.72	206.29	173.56	174.51	181.39	244.22	186.07	192.679	39.1446	0.20316	FALSE	591	0.3125	0	2	0	0	0	0	2	2	0.0945699		0.0945699	-0.0500145	0	-0.428571	-0.020903	0.428571	-0.0480769	0	-0.0333333	0.0631218
Reticulocalbin1	Nontoxin	Nontoxin	211.1	149.64	190.62	88.91	202.44	92.93	134.4	153.76	152.975	46.7653	0.305705	FALSE	969	0.401666	0	5	0	0	0	0	5	5	1.09682		1.09682	0.360471	-0.0666666	0.473684	0.501336	-1	0.25	1	-0.0107936	0.23632
Reticulocalbin2	Nontoxin	Nontoxin	75.01	129.68	66.01	117.53	82.59	105.51	114.75	102.66	99.2175	22.4284	0.226053	FALSE	924	0.378788	0	3	1	1	0	1	3	4	0.716348	0.649981	0.568782					0.451128	0.0795918	0.011111	0.0594768	0.0654761
Reticulon3	Nontoxin	Nontoxin	41.08	94.58	41.61	85.86	43.69	88.7	65.08	33.94	61.8175	24.8679	0.402279	FALSE	681	0.279166	0	3	1	1	0	1	3	4	-0.23045	-1.16221	0.280792	0.284752		0.6	0.324138	0.6	0.324138	0.0833335	0.255953	0.333189
RetinalDH1-2	Nontoxin	Nontoxin	1.66	23.1	27.39	34.24	7.77	11.15	30.38	25.4	20.1363	11.7595	0.583998	FALSE	1500	0.210989	0	1	4	4	0	4	1	5	-1.01027	-1.09466	-0.264521		-0.0833332		0.0746458		0.18064		0.0758913	0.0758913
RetinoicAcidInduced3	Nontoxin	Nontoxin	16.49	33.79	28.23	19.77	26.46	19.96	42.47	32.31	27.435	8.6702	0.316027	FALSE	1074	0.231818	0	7	4	4	0	4	7	11	-0.871882	-0.511606	-0.948547	0.0386218	-0.148148	-0.44127	0.168316	0.0615175	0.303375	-0.266667	0.158953	0.0930732
RetinolBinding5	Nontoxin	Nontoxin	6.4	30.96	14.5	10.02	6.91	22.22	8.36	38.68	17.2562	12.1621	0.704793	FALSE	408	0.325	0	2	0	0	0	0	2	2	0.200738		0.200738	-0.0370035	0	0.428571	-0.0668739	0.473684	-0.136182	0.022222	-0.0416666	0.0181912
RetinolDH16	Nontoxin	Nontoxin	76.03	58.2	67.59	104.34	63.4	109.23	56.88	123.44	82.3888	26.0311	0.315954	FALSE	954	0.365741	0	5	4	4	0	4	5	9	0.784532	0.202097	1.09682	0.523083	0.857143	0.836735	0.474405		0.182135	-0.0222222	0.0864197	0.0447594
Rheb	Nontoxin	Nontoxin	31.65	53.55	29.61	32.12	21.69	23.61	52.36	33.88	34.8087	11.9636	0.343695	FALSE	555	0.325	0	1	0	0	0	0	1	1	0.155746		0.155746	0.617577		1	-0.0961538	1	-0.0961538	0.666667	0.222222	-0.282803
RhoA	Nontoxin	Nontoxin	47.66	95.11	52.18	76.95	42.58	54.73	77.98	62.54	63.7163	18.0631	0.283492	FALSE	582	0.272222	0	3	0	0	0	0	3	3	-0.280343		-0.280343	-0.025291	0.166667	0.0857145	-0.0294	-0.214285	-0.000722933	-0.290909	-0.063492	-0.095651
rhoDissInh1	Nontoxin	Nontoxin	53.64	127	110.11	86.18	93.29	120.54	132.47	63.92	98.3937	29.213	0.296899	FALSE	615	0.330555	0	3	0	0	0	0	3	3	0.280792		0.280792	-0.13544	-0.25	0	0.0128887	-1.11429	-0.127331	-0.193939	-0.0198411	0.0522605
Rhophilin2	Nontoxin	Nontoxin	41.88	55.69	32.96	31.61	16.21	27.74	39.46	30.52	34.5087	11.5565	0.334886	FALSE	2055	0.247222	0	6	6	6	0	6	6	12	-0.6863	-0.646516	-0.583416	0.113061	0.0277778	-0.085714	0.110025	-0.275325	0.176546	0.0964862	0.0620168	0.142408
RibL28	Nontoxin	Nontoxin	107.34	101.75	136.13	87.63	108.92	151.84	133.2	136.58	120.424	21.9922	0.182623	FALSE	741	0.35	0	3	1	1	0	1	3	4	1.09132		1.09132						-0.809524		-0.809524	-0.809524
RibLargeSub1	Nontoxin	Nontoxin	12.16	10.79	17.05	7.19	8.3	8.25	10.48	22.04	12.0325	5.08477	0.422587	FALSE	699	0.263736	0	1	4	4	0	4	1	5	-0.438953	-0.105982	-1.0535	0.0382834	-0.27619		0.133333	-0.27619	0.158064	-0.266667	0.119744	0.0580043
RiboflavinKin	Nontoxin	Nontoxin	66.9	99.82	70.83	55.9	96.23	106.2	122.08	51.95	83.7388	25.7041	0.306956	FALSE	471	0.228022	0	4	0	0	0	0	4	4	-0.783934		-0.783934	-0.0832972	-0.085714		-0.244444	-0.085714	-0.159323	-0.5	-0.015316	-0.102102
ribokinase	Nontoxin	Nontoxin	9.99	18.42	17.43	15.55	10.71	11.94	13.67	13.88	13.9487	3.04617	0.218383	FALSE	933	0.233333	0	2	0	0	0	0	2	2	-0.57783		-0.57783	0.122137			0.172414		0.172414	8.88178e-17	0.166667	0.347826
Ribonuclease-k	Nontoxin	Nontoxin	102.42	147.6	83.8	156.07	75.29	121.09	149.14	119.45	119.358	30.5395	0.255866	FALSE	297	0.345833	0	1	1	1	0	1	1	2	0.377685	-0.448318	1.03439	0.169599	0.666667	1	0.4	-0.428571	-0.0342105	-1	0.266666	0.239233
RibonucleaseH1	Nontoxin	Nontoxin	28.42	66.11	48.62	42.5	31.18	44.07	54.6	59.05	46.8188	13.0649	0.279053	FALSE	885	0.240625	0	1	7	7	0	7	1	8	-0.726627	-0.976385	0.649981	0.139564	0.08	-0.114285	0.0477155	0.279699	0.269283	0.0666667	0.0958334	0.0577138
RibonucleaseH2C	Nontoxin	Nontoxin	19.6	24.49	20.81	31.89	16.13	18.24	37.58	59.93	28.5838	14.6113	0.511176	FALSE	429	0.166666	0	1	1	1	0	1	1	2	-0.0334055		-0.0334055						0.6		0.6	0.6
RibonucleaseInh	Nontoxin	Nontoxin	54.57	83.76	84.09	79.85	48.25	46.32	86.16	94.67	72.2087	19.2261	0.266257	FALSE	1368	0.23	0	3	2	2	0	2	3	5	-0.780402	-0.57783	-0.707875	0.0604524	-0.333333	-0.0714282	-0.0160524	-0.0714282	-0.0160524	0.0666667	0.0533335	-0.0109242
RibonucleaseP-p14-1	Nontoxin	Nontoxin	4.43	1.79	12.25	7.64	7.2	5.77	8.69	11.87	7.455	3.54946	0.476118	FALSE	399	0.270833	0	3	1	1	0	1	3	4	-0.316959	-1.16221	0.173909	-0.162296	-0.166667	-0.428571	0.0452203	-0.619047	-0.00955025	-0.576923	0.0491453	0.0984397
Ribonucleoprotein2-H-ACA	Nontoxin	Nontoxin	12.56	27.46	31.97	17.95	21.69	32.07	46.92	25.53	27.0188	10.4758	0.387723	FALSE
RibonucleoproteinA	Nontoxin	Nontoxin	25.77	39.2	41.29	23.56	26.92	46.64	68.23	28.97	37.5725	14.9365	0.397539	FALSE	768	0.197222	0	2	1	1	0	1	2	3	-1.0018	-0.448318	-1.03789	0.0112493		0.6	-0.0961538	0.6	-0.0961538	-0.133333	0.111111	-0.052678
RibonucleoproteinB	Nontoxin	Nontoxin	17.33	29.3	46.09	27.75	23.19	14.56	40.15	36.79	29.395	11.0579	0.376182	FALSE
RibonucT2	Nontoxin	Nontoxin	12.27	26.86	19.1	13.04	8.64	14.69	14.25	10.09	14.8675	5.77977	0.388752	FALSE	777	0.25	0	1	2	2	0	2	1	3	-0.494109	-1.49796	1.30896	0.0714913	0	1	0.136134	0.285714	0.134615	-0.7	0.222222	0.0621792
RiboRecyclingFactor	Nontoxin	Nontoxin	39.47	51.3	33.73	56.43	28.38	29.17	35.96	43.65	39.7612	10.1329	0.254844	FALSE	762	0.254321	0	4	5	5	0	5	4	9	-0.319393	-0.449428	-0.0259621						-0.0028241		-0.0028241	-0.0028241
Ribose5PhosphateIsomerase	Nontoxin	Nontoxin	33.04	21.98	35.13	9.71	23.81	10.22	38.33	35.56	25.9725	11.4122	0.439394	TRUE	708	0.5	0	1	0	0	0	0	1	1	1.30896		1.30896	0.182741	-0.5	-0.272727	0.742188	-1.8	0.25	0.666667	0.298246	0.453853
RibosePPKin2	Nontoxin	Nontoxin	50.57	79.71	46.34	53.68	23.63	37.16	84.29	81.47	57.1063	22.4638	0.393369	FALSE
RibS10	Nontoxin	Nontoxin	14.99	36.86	46.33	26.11	34.07	20.96	57.45	25.68	32.8063	13.9469	0.425129	FALSE	486	0.494444	0	2	1	1	0	1	2	3	1.85731	1.30896	1.61632	-0.0315683	-0.0333333	0.473684	0.0469241	-0.619047	-0.355934	-0.318519	-0.0277778	-0.151331
Rieske	Nontoxin	Nontoxin	100.82	124.13	110.1	122.28	87.67	114.75	144.59	133.54	117.235	18.0783	0.154205	FALSE	825	0.30303	0	2	0	0	0	0	2	2	-0.0430558		-0.0430558					-0.272727	0.151997	0.333334	-0.0513202	0.25
RING1	Nontoxin	Nontoxin	65.48	82.43	60.12	49.95	55.87	76.72	67.84	37.84	62.0313	14.3939	0.232043	FALSE	1158	0.362963	0	7	2	2	0	2	7	9	0.750679	1.61632	0.290254	0.189955	-0.166667	-0.205156	0.150303	0.102757	0.158704	0.498413	0.0216691	0.159745
RING11	Nontoxin	Nontoxin	8.2	39.62	17.89	12.64	16.22	20.28	33.7	11.97	20.065	11.015	0.548965	FALSE
RING146	Nontoxin	Nontoxin	20.86	33.2	18.1	23.81	16.61	26.42	30.61	23.96	24.1963	5.77185	0.238543	FALSE	1047	0.21875	0	2	2	2	0	2	2	4	-0.857644	-1.49796	0.0945699	0.145282	0	0.257143	0.198928	0.163636	0.0307876	0.028283	0.0921052	0.0684464
RINGBox2	Nontoxin	Nontoxin	143.95	165.36	116.2	179.34	241.2	298.05	281.32	214.34	204.97	65.1625	0.317912	FALSE	345	0.125	0	0	1	1	0	1	0	1	-1.16221	-1.16221		0	0	-0.428571	0.131579				0	-0.0640732
RINGFinger103	Nontoxin	Nontoxin	22.63	40.71	33.02	18.38	27.49	12.55	42.75	35.78	29.1638	10.7859	0.369838	FALSE	2019	0.352778	0	3	0	0	0	0	3	3	0.494558		0.494558	0.405542	0	0.6	0.586207	-1.8	0.474138	0.555556	0.211111	0.467365
RLP24	Nontoxin	Nontoxin	66.31	87.75	44.54	100.48	95.01	151.85	134.65	115.87	99.5575	34.8985	0.350537	FALSE
RNABind8A	Nontoxin	Nontoxin	69.61	105.27	111.51	102.76	83.4	163.73	135.38	85.38	107.13	30.4427	0.284166	FALSE	525	0.197619	0	7	0	0	0	0	7	7	-1.21301		-1.21301	-0.119594	-0.208333	-0.38961	0.0718395	-1.11429	-0.0628725	-0.3	0.0396826	0.0590331
RNABinding-PNO1	Nontoxin	Nontoxin	17.9	39.54	44.97	22.34	28.38	25.89	33.68	26.7	29.925	8.97697	0.299982	FALSE	624	0.191667	0	2	1	1	0	1	2	3	-1.05524	-1.16221	-0.648609	-0.113891	-0.25	-0.428571	0.0556681	-1	0.0769231	-0.4	0.074074	0.0297122
RNABinding47	Nontoxin	Nontoxin	35.49	34.33	25.56	24.52	36.87	36.07	58.59	28.49	34.99	10.7114	0.306128	FALSE	1788	0.385	0	11	4	4	0	4	11	15	1.08714	1.6295	0.714177	0.125373	0.0153846	-0.251948	0.154508	0.163636	0.00922645	-0.00726492	0.0851178	0.0377931
RNAHelicaseDDX1	Nontoxin	Nontoxin	43.24	34.08	63.23	32.72	42.7	56.87	75.28	43.44	48.945	14.8635	0.303678	FALSE	2223	0.322917	0	8	4	4	0	4	8	12	0.273173	-1.26856	1.11764	-0.0170252	0	-0.200577	-0.0141751	-0.1	0.0957692	-0.0609734	0.0144777	0.0406464
RNAHelicaseDDX19B	Nontoxin	Nontoxin	9.85	19.18	8.08	14.03	15.71	22.4	24.41	13.91	15.9462	5.74033	0.35998	FALSE	1443	0.310228	0	12	1	1	0	1	12	13	0.399462	-1.0535	0.613195	-0.101365	-0.301463		0.0821601	-0.416104	-0.0736382	-0.161202	-0.0221483	0.0261125
RnaMeT3	Nontoxin	Nontoxin	14.31	19.07	27.62	13.79	14.7	11.11	27.98	18.03	18.3262	6.34869	0.346426	FALSE	939	0.294444	0	0	3	3	0	3	0	3	-0.0665776	-0.0665776		0.103704		0.6	0.104003	0.6	0.104003	-0.102564	0.203704	0.2724
RNAPhosphateCyclase	Nontoxin	Nontoxin	19.04	34.01	25.45	25.92	23.1	27.74	37.3	32.55	28.1388	6.07509	0.215898	FALSE	1122	0.227083	0	5	3	3	0	3	5	8	-0.888623	-1.34917	-0.379442	0.0475844	0.166667	-0.376623	0.0148289	0.0857145	0.174912	-0.133333	0.0585318	0.131139
RNAPolIELL2	Nontoxin	Nontoxin	44.91	62.31	44.93	50.04	63.13	41.61	71.05	77.23	56.9013	13.3604	0.234799	FALSE	1920	0.198333	0	7	3	3	0	3	7	10	-1.27507	-1.05524	-1.17125	0.13349	0.0333334	0.311278	0.191111	-0.180952	0.0546322	0.0962963	0.0611111	0.0631344
RNAPolII-3	Nontoxin	Nontoxin	8.85	24.92	25.42	16.95	13.74	14.7	14.14	15.78	16.8125	5.6739	0.337481	FALSE	2007	0.179167	0	0	2	2	0	2	0	2	-1.03789	-1.03789		-0.0441945			0.0381301		0.0381301	-0.2	0.0833335	0.223383
RNAPolII-RPB11-a	Nontoxin	Nontoxin	33.08	83.61	54.05	45.87	48.7	56.31	46.81	67.6	54.5037	15.3462	0.281563	FALSE	354	0.125	0	2	0	0	0	0	2	2	-1.49796		-1.49796	0	0	-0.428571	0.131579	-0.428571	0.131579		0	-0.0640732
RNAPolII-RPB3	Nontoxin	Nontoxin	18.79	29.73	40.45	31.99	19.1	19.33	33.03	41.97	29.2987	9.41189	0.321239	FALSE	828	0.233333	0	1	0	0	0	0	1	1	-0.448318		-0.448318	0.224719	0	-0.272727	0.131579	0.6		0.666667	-0.142857	0.0559441
RNAPolII-RPB4	Nontoxin	Nontoxin	127.38	54.5	129.01	39.26	59.59	58.37	101.64	86.7	82.0563	34.477	0.420162	FALSE
RNAPolII-RPB7	Nontoxin	Nontoxin	75.65	53.84	60.42	53.63	45.01	43.94	72.98	133.74	67.4013	29.2137	0.43343	FALSE	519	0.3125	0	6	0	0	0	0	6	6	0.126466		0.126466	0.303765	-0.5	0.654737	0.350792	0.36	0.252355	-0.133333	0.352778	0.181813
RNAPolIIE	Nontoxin	Nontoxin	61.43	148.92	132.27	77.34	89.53	128.97	110.1	62.06	101.328	33.6195	0.33179	FALSE	633	0.125	0	1	0	0	0	0	1	1	-1.16221		-1.16221	-0.210526			-0.0961538		-0.0961538	-0.4	0	0.0989399
RNAPolIII-RPC5	Nontoxin	Nontoxin	27.52	52.14	35.35	38.23	22.66	33.25	29.2	38.95	34.6625	8.9758	0.258948	FALSE	2109	0.229444	0	11	4	4	0	4	11	15	-0.934879	-1.11717	-0.738919	0.104208	-0.133333	-0.185714	0.282515	-0.44935	0.175122	0.298413	0.117076	0.133469
RNAPolTran-p15	Nontoxin	Nontoxin	94.3	173.07	177.6	102.01	72.21	95.21	163.37	108.28	123.256	41.318	0.33522	FALSE	396	0.225	0	1	1	1	0	1	1	2	-0.648609	-1.16221	0.155746	-0.0580189			0.0539641		0.0539641	-0.276923	0.111111	0.285891
RNAPolyAssoc-RTF1	Nontoxin	Nontoxin	12.85	30.09	19.84	20.89	12.93	18.33	24.78	39.95	22.4575	9.0952	0.404996	FALSE	2016	0.234722	0	4	2	2	0	2	4	6	-0.756942	-1.03789	-0.403469	0.42294	0.25	0.390476	-0.176211	0.409524	0.301274	0.555556	0.0476192	-0.0404543
RNAPolyI-RPA49	Nontoxin	Nontoxin	8.29	24.32	18.56	18.89	9.43	9.47	15.66	13.87	14.8113	5.64074	0.380841	FALSE	1233	0.287121	0	7	4	4	0	4	7	11	-0.178575	-1.26856	0.554717	0.276878	0.2	-0.291428	0.227028	0.338961	0.406951	0.21894	0.14495	0.239389
RNAPolyII-Transcription7	Nontoxin	Nontoxin	6.15	25.73	5.75	16.96	7.72	13.78	18.23	12.01	13.2913	6.90094	0.519209	FALSE	693	0.125	0	1	0	0	0	0	1	1	-1.16221		-1.16221	-0.210526			-0.0961538		-0.0961538	-0.4	0	0.0989399
RNAProccessing-EBP2	Nontoxin	Nontoxin	32.79	19.45	44.39	30.85	38.76	17.12	62.08	50.84	37.035	15.2925	0.412919	FALSE	924	0.285417	0	6	2	2	0	2	6	8	-0.190793	-1.03789	0.221117	-0.00734637	-0.125	0.4	0.0923077	0.0142859	-0.0064271	-0.833333	0.215278	-0.00259345
ROSM1	Nontoxin	Nontoxin	261.31	379.09	410.12	266.4	227.62	323.65	384.89	309.74	320.352	66.3251	0.207038	FALSE
RPABC4	Nontoxin	Nontoxin	153.3	129.7	274.64	142.89	176.32	182.94	262.2	130.01	181.5	57.1175	0.314697	FALSE	177	0.125	0	1	0	0	0	0	1	1	-1.16221		-1.16221	0	0	-0.428571	0.131579				0	-0.0640732
RPABC5	Nontoxin	Nontoxin	174.45	230.82	225.96	63.82	169.41	99.75	169.6	226.74	170.069	61.2717	0.360276	FALSE
RPF2	Nontoxin	Nontoxin	32.37	42.48	42.45	27.5	21.86	20.05	30.84	42.67	32.5275	9.24284	0.284155	FALSE	918	0.25	0	1	2	2	0	2	1	3	-0.494109	0.0945699	-1.16221	-0.162231	-0.166667	-0.714286	-0.241903	0	-0.0958075	-1	-0.0277778	-0.126881
RpL10	Nontoxin	Nontoxin	3198.88	2596.12	4381.13	2770.16	2000.02	2511.47	6581.12	4349.32	3548.53	1494.74	0.421227	FALSE
RpL10a	Nontoxin	Nontoxin	1069.99	839.44	1184.3	913.87	433.01	594.65	1949.18	1784.92	1096.17	534.643	0.487737	FALSE	654	0.179167	0	2	0	0	0	0	2	2	-1.03789		-1.03789	0.0610685	0		0.172414	-0.428571	0.151997	8.88178e-17	0.0833335	0.141876
RpL11	Nontoxin	Nontoxin	1505.01	1644.48	1900.43	1626.05	893.93	1458.67	2053.43	2910.91	1749.11	581.458	0.33243	FALSE	540	0.125	0	2	0	0	0	0	2	2	-1.49796		-1.49796	0.169247		0.6	-0.0961538	0.6	-0.0961538	0.133333	0	0.0174334
RpL12	Nontoxin	Nontoxin	1029.34	627.23	1215.31	871.67	540.48	714.29	1002.48	1279.88	910.085	269.681	0.296325	FALSE	498	0.236111	0	3	0	0	0	0	3	3	-0.627713		-0.627713	-0.210526	0	-1	-0.253497		0.0039248	-0.317949	-0.079365	0.0478461
RpL13	Nontoxin	Nontoxin	901.31	1300.09	1041.18	1503.14	693.67	1253.36	1750.33	1900.4	1292.93	414.022	0.320218	FALSE	636	0.179167	0	1	1	1	0	1	1	2	-1.03789	-0.448318	-1.16221	0.529829	0.5	0.514285	0.555556	0.6		0.666667	0.0833335	-0.00406455
RpL13a	Nontoxin	Nontoxin	1065.87	1980.73	1780.16	1497.21	876.68	1012.39	1854.66	2858.79	1615.81	653.469	0.404422	FALSE	612	0.233333	0	1	0	0	0	0	1	1	-0.448318		-0.448318	0.510638	0.5			0.428571	0.555556		0.166667	0.0559441
RpL14	Nontoxin	Nontoxin	2857.7	2852.55	4380.61	1505.05	1503.51	1081.31	4493.65	5575.47	3031.23	1645.78	0.54294	FALSE	420	0.227778	0	3	0	0	0	0	3	3	-0.707875		-0.707875	0.155177	0.333334	0.473684	0.323017	-1	0.0769231	-0.4	0.074074	0.0070449
RpL15	Nontoxin	Nontoxin	2744.69	2964.97	4130.74	1383.45	1696.24	1237.72	4105.2	4643.87	2863.36	1338.34	0.467401	FALSE	615	0.391666	0	2	0	0	0	0	2	2	0.766969		0.766969	-0.0308919	-0.25	-0.428571	0.293062	-1	-0.0154495	0.4	0.0396825	0.0470996
RpL17	Nontoxin	Nontoxin	2281.31	1793.28	2342.73	2031.92	1324.66	1799.63	3129.09	4246.42	2368.63	923.559	0.389913	FALSE	555	0.175	0	4	0	0	0	0	4	4	-1.31182		-1.31182	0.148271	0.5	0.3	0.121083	0.6	-0.0961538	0.133333	-0.0166667	0.0785824
RpL18	Nontoxin	Nontoxin	1260.34	1995.41	1987.77	1768.2	841.27	1318.9	3023.05	4427.05	2077.75	1152.41	0.554645	FALSE	567	0.179167	0	3	1	1	0	1	3	4	-1.26856	-0.448318	-1.34917	0.202687	0.333333	0.428571	0.229701	0	0.196994	-0.4	0.0833335	0.0366887
RpL18a	Nontoxin	Nontoxin	1760.03	1547.65	2863.99	2100.37	895.54	1350.08	3213.15	4884.77	2326.95	1287.27	0.553201	FALSE	531	0.125	0	1	0	0	0	0	1	1	-1.16221		-1.16221	0	0			-0.428571	0.131579		0	-0.0640732
RpL21	Nontoxin	Nontoxin	1320.82	1894.65	2110.33	2304.4	916.5	1245.79	2942.38	4175.4	2113.78	1058.09	0.500567	FALSE	483	0.4	0	1	0	0	0	0	1	1	0.649981		0.649981	0.591716	0.666667	-0.272727	0.742188	0.6		0.666667	-0.025641	0.214373
RpL22-2	Nontoxin	Nontoxin	400.33	88.91	136.7	73.9	184.62	154.85	183.72	79.6	162.829	105.806	0.649797	FALSE	366	0.316667	0	1	1	1	0	1	1	2	0.129959	-0.448318	0.649981	0.0564496	0	0.514285	0.0200166	0.0857145	-0.163684	-0.2	0.121795	-0.0952814
RpL23	Nontoxin	Nontoxin	5293.33	4627.68	6436.61	2122.62	2718.75	1943.76	6724.29	9609.11	4934.52	2653.71	0.537785	FALSE
RpL24	Nontoxin	Nontoxin	1715.02	1747.35	2350.28	2016.89	1107.23	1349.64	2535.48	3414.43	2029.54	733.719	0.36152	FALSE
RpL26	Nontoxin	Nontoxin	1386.99	1759.17	2063.48	1851.42	949.16	1033.88	2530.39	3743.01	1914.69	907.013	0.473713	FALSE
RpL27	Nontoxin	Nontoxin	3345.41	2905.47	4849.77	1607.77	2009.73	1081.41	5041.51	6619.28	3432.54	1924.28	0.560599	FALSE
RpL27a	Nontoxin	Nontoxin	1886.24	1473.55	2811.95	1623.53	1112.21	1238.7	3006.9	3900.02	2131.64	996.001	0.467247	FALSE	447	0.125	0	1	0	0	0	0	1	1	-1.16221		-1.16221	0	0			-0.428571	0.131579		0	-0.0640732
RpL29	Nontoxin	Nontoxin	2757.38	3634.74	3718.13	3356.33	1860.4	2273.93	4816.32	7535.03	3744.03	1787.54	0.477438	FALSE
RpL3	Nontoxin	Nontoxin	623.17	423.18	759.24	580.09	403.22	509.64	685.2	747.89	591.454	137.835	0.233044	FALSE
RpL30	Nontoxin	Nontoxin	1686.94	1892.87	2088.69	1900.77	1203.65	1453.76	2936.02	3068.38	2028.89	662.316	0.326444	FALSE	348	0.288889	0	3	0	0	0	0	3	3	-0.120019		-0.120019	0.0225296	-0.333333	-0.428571	0.210526	-0.428571	0.210526	0	0.222222	0.248678
RpL31	Nontoxin	Nontoxin	2816.57	2306.25	3243.43	2159.99	1281.62	1822.73	3636.76	4089.2	2669.57	951.461	0.35641	FALSE	378	0.125	0	1	0	0	0	0	1	1	-1.16221		-1.16221	-0.210526			-0.0961538		-0.0961538	-0.4	0	0.0989399
RpL32	Nontoxin	Nontoxin	2400.26	1936.06	2729.85	1870.59	1107.49	1451.18	2992.8	3984.58	2309.1	923.608	0.399986	FALSE	408	0.25	0	3	0	0	0	0	3	3	-0.494109		-0.494109	0.332871	0	0.4	-0.037594	0.309091	-0.176211	0.383839	-0.0222222	-0.0627181
RpL34	Nontoxin	Nontoxin	1059.54	1110.38	1773.13	1284.36	522.47	665.54	1865.1	3692.34	1496.61	1004.16	0.670957	FALSE	354	0.125	0	2	0	0	0	0	2	2	-1.49796		-1.49796	0.169247		0.6	-0.0961538	0.6	-0.0961538	0.133333	0	0.0174334
RpL35	Nontoxin	Nontoxin	2407.8	3790.78	3013.44	3468.52	1674.84	2614.77	3306.66	3143.75	2927.57	673.256	0.229971	FALSE	372	0.161111	0	3	0	0	0	0	3	3	-1.34917		-1.34917	0.004731	0	-0.272727	0.0177126	0.0857145	0.0177126	0.133333	-0.047619	0.0302703
RpL35a	Nontoxin	Nontoxin	977.95	1254.94	836.75	1266.56	539.24	1231.63	1156.12	1575.38	1104.82	315.475	0.285544	FALSE	333	0.233333	0	2	0	0	0	0	2	2	-0.57783		-0.57783	0.122137			0.172414		0.172414	8.88178e-17	0.166667	0.347826
RpL36	Nontoxin	Nontoxin	1868.17	2142.07	2142.57	1887.93	1010.09	1822.17	2431.59	2817.49	2015.26	525.723	0.260871	FALSE	318	0.325	0	2	0	0	0	0	2	2	0.200738		0.200738	-0.0883012	-0.25	-0.2	0.0769231	-0.350649	-0.0498175	1.11022e-16	0.0777777	-0.0395521
RpL36a	Nontoxin	Nontoxin	2910.13	2706.15	2994.94	2568.5	1333.64	1876.05	2737.09	3611.99	2592.31	700.473	0.270212	FALSE
RpL37	Nontoxin	Nontoxin	3599.11	2746.85	4578.72	2981.33	1347.15	1876.22	5149.66	7692.53	3746.45	2038.69	0.544168	FALSE
Rpl37a	Nontoxin	Nontoxin	3734.07	2483.2	4062.5	2532.91	1608.74	2432.28	3466.19	4422.33	3092.78	969.715	0.313542	FALSE	279	0.4	0	1	0	0	0	0	1	1	0.649981		0.649981	0.178571	0.5	0	0.136187	0.6	-0.0961538	1.11022e-16	-0.111111	-0.0620757
RpL38	Nontoxin	Nontoxin	1230.31	1386.96	1257.64	1530.22	638.09	1228.15	1749.99	1505.12	1315.81	327.995	0.249273	FALSE	213	0.5	0	1	0	0	0	0	1	1	1.30896		1.30896	0.422111	0	0	0.555556	-0.272727	0.742188	0.666667	0.368421	0.519393
RpL39	Nontoxin	Nontoxin	2118.25	1743.7	2632.37	1978.46	935.47	1372.02	2423.09	2850.52	2006.73	644.719	0.321278	FALSE
RpL40	Nontoxin	Nontoxin	918.17	1457.5	1229.57	1226.91	930	1057.37	1301.78	1709.49	1228.85	268.29	0.218326	FALSE	387	0.3125	0	2	0	0	0	0	2	2	0.0945699		0.0945699	0.177756	0.2	0.473684	0.0177126	-0.428571	0.323017	0.3	-0.0416666	0.276396
RpL5	Nontoxin	Nontoxin	888.33	1324.48	1265.77	1368.55	650.99	839.88	1968.32	2097.53	1300.48	519.831	0.399722	FALSE	894	0.254167	0	5	1	1	0	1	5	6	-0.53609	-1.16221	-0.233638	0.13749	0	0.038961	0.196994	0.515789	0.170365	0.216667	0.052381	0.15404
RpL6	Nontoxin	Nontoxin	906.85	1165.41	874.17	1283.4	677.37	1023.42	1255.73	1796.65	1122.88	341.444	0.30408	FALSE	780	0.386111	0	3	0	0	0	0	3	3	0.815206		0.815206	0.201648	0.0833335	0.0857145	0.332068	-0.214285	0.18392	0.222222	0.190236	0.300947
RpL7-1	Nontoxin	Nontoxin	1529.45	1057.59	1934.29	1453.21	841.02	1043.77	2620.76	2897.86	1672.24	756.171	0.45219	FALSE
RpL7-2	Nontoxin	Nontoxin	39.53	38.71	64.71	20.14	22.58	27.43	47.9	37.74	37.3425	14.5375	0.389301	FALSE	744	0.294444	0	2	1	1	0	1	2	3	-0.0665776	-1.16221	0.660801	0.247243	0	0.342857	0.258981	-0.6	-0.323194	0.242424	0.0277779	-0.0235622
RpL8	Nontoxin	Nontoxin	1421.85	1624.13	1858.53	1881.76	860.35	1398.28	2054.64	2656.03	1719.45	531.047	0.308848	FALSE
RpL9	Nontoxin	Nontoxin	897.68	1160.67	1244.24	1121.61	632.26	824.1	1587.84	1794.98	1157.92	388.207	0.335262	FALSE	579	0.2875	0	9	0	0	0	0	9	9	-0.252591		-0.252591	0.0991673	-0.208333	-0.357143	0.240452	-0.428571	0.178519	0.0114286	0.186111	0.232217
RpP2	Nontoxin	Nontoxin	2101.27	1718.06	1814.62	1483.92	947.67	1303.03	2663.08	3522.27	1944.24	820.777	0.422158	FALSE	345	0.236111	0	2	1	1	0	1	2	3	-0.627713	1.03439	-1.49796	-0.110193	0	-0.428571	-0.0834117	0.428571	-0.323194	-1	-0.047619	-0.109251
RPPPKin1	Nontoxin	Nontoxin	46.69	81.53	39.52	90.07	52.34	103.99	81.75	75.6	71.4363	22.7667	0.318699	FALSE	957	0.527473	0	1	0	0	0	0	1	1	1.45689		1.45689	0.435106	-0.428571		0.666667	0.473684	0.396601	-0.4	0.618058	0.185593
RpS10	Nontoxin	Nontoxin	1747.55	2124.6	2666.21	2190.78	1303.7	1399.74	2979.75	4455.55	2358.49	1025.82	0.43495	FALSE
RpS11	Nontoxin	Nontoxin	718.23	988.58	464.31	1223.69	562.54	1094.37	1136.42	1510.61	962.344	355.526	0.369438	FALSE	477	0.252083	0	4	0	0	0	0	4	4	-0.511606		-0.511606	0.588028	0	0.642857	0.131579	0.649123	0.131579	1	-0.1	-0.0219021
RpS12	Nontoxin	Nontoxin	6135.31	3514.98	4654.14	4424.56	5160.47	3324.5	7389.76	8110.46	5339.27	1742.05	0.32627	FALSE
RpS12_2	Nontoxin	Nontoxin	187.58	105.4	192.73	164.46	191.21	122.13	231.83	212.49	175.979	43.282	0.24595	FALSE
RpS14	Nontoxin	Nontoxin	1642.37	1845.82	2109.76	1864.72	1022.11	1413.53	2041.33	2818.49	1844.77	529.297	0.286918	FALSE	456	0.379167	0	2	0	0	0	0	2	2	0.660801		0.660801	0.515721	0	0.0857145	0.742188	-0.272727	0.565789	0.833333	0.155844	0.457879
RpS15	Nontoxin	Nontoxin	2983.58	1853.81	2090.01	3254.2	1172.93	2666.5	4283.91	6727.86	3129.1	1734.86	0.554428	FALSE	438	0.233333	0	1	0	0	0	0	1	1	-0.448318		-0.448318	0.224719	0	0.6		-0.272727	0.131579	0.666667	-0.142857	0.0559441
RpS15a	Nontoxin	Nontoxin	1894.72	2783.62	3220.85	3107.53	1146.67	2043.93	3733.39	4974.38	2863.14	1193.07	0.4167	FALSE
RpS16	Nontoxin	Nontoxin	1631.38	2201.45	2473.06	2382.86	1273.36	2076.41	2231.42	2630.11	2112.51	451.981	0.213955	FALSE	441	0.225	0	1	1	1	0	1	1	2	-0.648609	-1.16221	0.155746	0.0472441	0	-0.428571	0.16783		0.204082	-0.153846	0.111111	0.204385
RpS17	Nontoxin	Nontoxin	1838.04	1947.24	2380.01	2334.07	1018.46	2162.09	3086.64	3399.95	2270.81	739.561	0.325681	FALSE	408	0.125	0	1	0	0	0	0	1	1	-1.16221		-1.16221	-0.210526			-0.0961538		-0.0961538	-0.4	0	0.0989399
RpS19	Nontoxin	Nontoxin	1583.33	1524.11	1476.44	1497.61	820.71	1124.15	1918.64	2355.96	1537.62	464.049	0.301797	FALSE
RpS2	Nontoxin	Nontoxin	1349.15	1425.29	1041.48	1567.56	837.7	1263.2	1692.24	2745.47	1490.26	576.349	0.386744	FALSE	873	0	0	0	1	1	0	1	0	1
RpS20	Nontoxin	Nontoxin	2855.05	3117.08	4592.34	3640.76	1341.89	1933.19	5189.46	8600.72	3908.81	2281.06	0.583568	FALSE	360	0.233333	0	1	0	0	0	0	1	1	-0.448318		-0.448318	0.122137			0.172414		0.172414	8.88178e-17	0.166667	0.347826
RpS21	Nontoxin	Nontoxin	1287.49	963.74	1620.35	1211.02	471.84	894.93	1684.47	2108.24	1280.26	517.087	0.403892	FALSE
RpS23	Nontoxin	Nontoxin	696.76	554.36	912.38	646.31	279.09	441.41	878.18	1031.7	680.024	254.06	0.373604	FALSE	432	0.304167	0	4	0	0	0	0	4	4	0.0290785		0.0290785	0.0520608	0	-1.8	0.101255	-0.085714	0.132689	0.0727273	0.0251833	0.098518
RpS23-1	Nontoxin	Nontoxin	1268.25	1009.56	1659.4	1243.51	581.04	926.84	1840.79	2337.15	1358.32	562.495	0.414111	FALSE	432	0.325	0	1	0	0	0	0	1	1	0.155746		0.155746	-0.296736	-0.333333	-0.428571	-0.231214	-0.428571	-0.231214	-0.4	-0.0666667	-0.133374
RpS24	Nontoxin	Nontoxin	1615.14	2433.78	1865.78	2523.57	1122.97	2154.83	2342.9	3420.03	2184.88	684.754	0.313406	FALSE	396	0.197222	0	3	0	0	0	0	3	3	-1.0018		-1.0018	-0.216009	0		-0.148077	-0.428571	-0.0998783	-0.7	-0.047619	-0.00112373
RpS25	Nontoxin	Nontoxin	1526.19	1673.78	1145.17	2040.67	1018.91	1683.08	1511.86	2830.14	1678.72	564.162	0.336066	FALSE	378	0.225	0	2	0	0	0	0	2	2	-0.648609		-0.648609	0.208936	-0.5	-0.2	0.25	0.0857145	0.131579	0.666667	0.111111	-0.0049017
RpS27	Nontoxin	Nontoxin	1128.09	1290.88	1190.24	1410.36	929.88	1052.7	1530.8	2169.06	1337.75	387.14	0.289396	FALSE	255	0.3125	0	2	0	0	0	0	2	2	0.0945699		0.0945699	0.290909	0	1	1	-0.714286	0.19079		0.333334	0.161841
RpS27a	Nontoxin	Nontoxin	2868.26	2525.4	3504.98	2740.04	1436.87	1857.56	3907.9	4788.24	2953.66	1090.13	0.369077	FALSE	471	0.291666	0	2	0	0	0	0	2	2	-0.0823774		-0.0823774	0.263416			0.329078		0.329078	0.133333	0.266666	0.475471
RpS29	Nontoxin	Nontoxin	1904.11	262.41	33.44	1816.94	727.66	1265.6	1922.93	2287.16	1277.53	845.17	0.661565	TRUE	171	0.354166	0	4	0	0	0	0	4	4	0.548135		0.548135	0.223158	0.291667	-0.428571	0.352246	0.451128	-0.0637269	0.311111	-0.0324463	0.156665
RpS3	Nontoxin	Nontoxin	1438.57	1140.46	753.84	1810.33	1078.13	1765.72	2008.64	2154.07	1518.72	495.465	0.326239	FALSE	732	0.215625	0	8	0	0	0	0	8	8	-1.0257		-1.0257	-0.0439961	-0.111111	-0.428571	0.054409	-0.571428	0.132154	-0.184615	0.0611112	0.0611691
RpS3a	Nontoxin	Nontoxin	2577.81	2051.68	3166.26	2527.6	1279.42	1649.91	3467.57	4388.25	2638.56	1015.05	0.384697	FALSE	795	0.315	0	5	0	0	0	0	5	5	0.149096		0.149096	0.283198	0	0.2	0.562378	-0.231579	0.560547	0.666667	0.291429	0.179767
RpS4	Nontoxin	Nontoxin	2318.28	2133.03	2989.01	2671.66	1234.06	1600.18	3482.49	4567.27	2624.5	1066.6	0.406402	FALSE	792	0.19375	0	4	0	0	0	0	4	4	-1.11717		-1.11717	-0.191914	0	0.6	-0.130769	-0.350649	-0.14353	-0.637037	-0.00641025	-0.0114921
RpS5	Nontoxin	Nontoxin	982.76	1077.38	1121.78	1421.92	636.42	1078.86	1752.87	2175.25	1280.9	486.137	0.379526	FALSE
RpS6	Nontoxin	Nontoxin	773.02	1566.07	1264.91	1623.78	693.49	1042.16	1627.18	2127.19	1339.72	488.082	0.364315	FALSE	750	0.330555	0	3	0	0	0	0	3	3	0.280792		0.280792	0.0748565	0	1	0.18297	-1	-0.0744513	-0.051282	0.123457	0.135508
RpS7	Nontoxin	Nontoxin	1705.39	1789.01	2528.49	2050.63	790.06	1107.64	3145.37	4543.58	2207.52	1201.82	0.54442	FALSE
RpS8	Nontoxin	Nontoxin	1994.05	1904.76	2588.58	2360.12	1406.39	1846.2	2796.38	3385.06	2285.19	628.283	0.274937	FALSE	627	0.161111	0	3	0	0	0	0	3	3	-1.34917		-1.34917	0.283044	0.5	0.6	-0.0961538	0.514285	0.229701	0.133333	0.0555557	0.0302703
RpS9	Nontoxin	Nontoxin	1504.71	1269.71	1784.09	1093.49	818.24	979.34	1786.52	1538.47	1346.82	364.645	0.270745	FALSE	585	0.23125	0	7	1	1	0	1	7	8	-0.838778	-0.448318	-0.823275	0.427755	0.285714	-0.142857	0.19079	0.387755	0.484893	1	0.131945	0.0172303
RpSA	Nontoxin	Nontoxin	5824.92	2854.41	4792.57	1261.21	2711.18	1441.07	4944.01	5257.28	3635.83	1788.53	0.491919	FALSE	891	0.3125	0	2	0	0	0	0	2	2	0.0945699		0.0945699	0.77451		0.6	1	0.6	1	0.833333	0.333334	0.467963
rRNAMat	Nontoxin	Nontoxin	35.6	18.06	19.03	23.7	14.74	14.42	25.65	17.4	21.075	7.07103	0.335517	FALSE	498	0.125	0	0	4	4	0	4	0	4	-1.83088	-1.83088		-0.157894	0		-0.0961538	-0.428571	-0.0392206	-0.4	0	0.0581866
rRNAProcFCF1	Nontoxin	Nontoxin	30.13	46.35	75.51	29.69	28.59	34.62	55.53	30.86	41.41	16.7884	0.405418	FALSE	597	0.125	0	2	0	0	0	0	2	2	-1.49796		-1.49796	-0.105263	0		-0.0961538	-0.428571	0.0177126	-0.4	0	0.0174334
RRP43	Nontoxin	Nontoxin	24.59	32.06	39.61	31.37	15.31	31.87	34.9	27.32	29.6288	7.33994	0.24773	FALSE	831	0.2875	0	2	2	2	0	2	2	4	-0.143941	-1.49796	1.26242	0.256971	0	-0.350649	0.291751	0	0.486467	0.422222	0.185898	0.336198
RUNFYVE1	Nontoxin	Nontoxin	13.2	28.83	23.79	22.4	15.29	19.25	33.1	26	22.7325	6.70775	0.295073	FALSE	1800	0.253571	0	6	1	1	0	1	6	7	-0.558812	-0.448318	-0.50454	0.137715	-0.111111	0.154136	0.0687381	0.333333	0.0439461	0.0981196	0.0805323	0.0831425
RuvB1	Nontoxin	Nontoxin	7.62	33.39	20.52	27.52	18.96	25.48	23.66	17.47	21.8275	7.68642	0.352144	FALSE	1371	0.20625	0	4	0	0	0	0	4	4	-0.987408		-0.987408	-0.048561	-0.166666	0.0857145	-0.0548583	-0.085714	-0.0998783	-0.244444	0.0059525	0.0131432
RWD-4	Nontoxin	Nontoxin	13.75	15.54	29.47	16.1	18.92	17.79	31.49	33.86	22.115	8.09082	0.365852	FALSE	564	0.5	0	0	1	1	0	1	0	1	1.30896	1.30896		0.792793	0.5	1	1	0.428571	0.555556		0.722222	0.453853
RWD1	Nontoxin	Nontoxin	87.26	109.12	118.05	84.76	58.66	81.64	119.48	93.5	94.0588	20.6638	0.219691	FALSE	723	0.125	0	2	0	0	0	0	2	2	-1.49796		-1.49796	-0.210526			-0.0961538		-0.0961538	-0.4	0	0.0989399
RWD2A	Nontoxin	Nontoxin	25.66	55.7	45.59	34.3	38	19.63	43.67	34.24	37.0988	11.4275	0.308028	FALSE	876	0.304167	0	3	3	3	0	3	3	6	0.0318151	0.22735	-0.17346	-0.195533	-0.333333	-1.07532	-0.112154	-0.490909	-0.11486	-0.0525252	-0.0907408	0.0173777
s-adenosylmethionineDecarb	Nontoxin	Nontoxin	25.5	38.57	33.06	39.09	22.46	35.3	50.9	32.44	34.665	8.77736	0.253205	FALSE
S100-A1	Nontoxin	Nontoxin	30.84	116.58	52.96	34.79	8.61	84.66	51.66	84.23	58.0412	35.0748	0.604309	FALSE	285	0.179167	0	2	0	0	0	0	2	2	-1.03789		-1.03789	-0.0441945			0.0381301		0.0381301	-0.2	0.0833335	0.223383
S100-A10	Nontoxin	Nontoxin	47.89	170.3	141.95	117.06	78.36	119.61	76.3	78.43	103.737	40.4906	0.390318	FALSE	297	0.233333	0	1	0	0	0	0	1	1	-0.448318		-0.448318	0.122137			0.172414		0.172414	8.88178e-17	0.166667	0.347826
S100-A11	Nontoxin	Nontoxin	84.52	308.13	315.34	588.96	155.09	235.14	215.12	246.37	268.584	150.058	0.558701	FALSE	330	0.125	0	1	0	0	0	0	1	1	-1.16221		-1.16221	-0.210526			-0.0961538		-0.0961538	-0.4	0	0.0989399
S100-A16	Nontoxin	Nontoxin	105.65	173.32	161.05	279.03	54.46	174	126.87	184.54	157.365	65.7697	0.417943	FALSE	330	0.3375	0	4	0	0	0	0	4	4	0.375116		0.375116	0.064004	0.2	0.215038	-0.149933	0.215038	0.0905056	-0.088889	0.0416668	-0.0226129
S100-A4	Nontoxin	Nontoxin	13.67	4.54	67.01	140.93	7.11	9.66	59.95	24.73	40.95	47.046	1.14887	FALSE
S100-A6	Nontoxin	Nontoxin	557.88	850.88	4452.27	3438.06	453.34	434.7	2458.14	1823.53	1808.6	1524.66	0.843006	FALSE	273	0.233333	0	0	1	1	0	1	0	1	-0.448318	-0.448318		0.224719	0	0.6		-0.272727	0.131579	0.666667	-0.142857	0.0559441
S100A9	Nontoxin	Nontoxin	0	17.47	18.43	62.37	8.36	0	3.73	3.91	14.2837	20.7081	1.44976	FALSE	288	0.484848	0	1	1	1	0	1	1	2	1.46689	1.13811	1.13811		-0.428571		-0.21978		-0.153846		2.77556e-17	2.77556e-17
S4aC3Dehydro	Nontoxin	Nontoxin	7.61	22.99	4.94	22.78	16.19	8.53	24.8	15.45	15.4113	7.73074	0.50163	FALSE	1038	0.373626	0	6	4	4	0	4	6	10	0.850227	0.71321	0.78033	0.2483	-0.751948		0.486111	-0.206917	0.262555	0.511111	0.270175	0.207803
SaccharopineDH	Nontoxin	Nontoxin	8.95	24.97	23.22	44.17	7.42	18.37	16.1	18.93	20.2663	11.4521	0.565085	FALSE	1287	0.125	0	4	2	2	0	2	4	6	-2.00318	-1.49796	-1.83088	-0.175438	0		-0.0961538	-0.428571	-0.0581983	-0.4	0	0.0717711
SAP18	Nontoxin	Nontoxin	54.47	82.61	92.94	51.65	41.97	77.07	82.62	41.73	65.6325	20.3704	0.310371	FALSE	462	0.252778	0	3	0	0	0	0	3	3	-0.467388		-0.467388	-0.0355433	0	0.6	0.0539641	-0.085714	0.0348157	-0.6	0.09127	0.00727093
SAPRibonucleoprotein	Nontoxin	Nontoxin	46.44	59.92	70.08	40.72	44.57	51.18	55.53	44.28	51.59	9.81512	0.190252	FALSE
SAR1b	Nontoxin	Nontoxin	58.28	130.94	82.06	71.64	115.61	71.01	91.34	74	86.86	24.7207	0.284604	FALSE
SarcolemmaAssoc	Nontoxin	Nontoxin	9.84	20.61	12.08	16.28	8.94	10.88	20.24	17.32	14.5237	4.67495	0.321883	FALSE	2529	0.212037	0	5	4	4	0	4	5	9	-1.08864	-1.83088	-0.215413	0.152924	0	-0.160714	-0.0422078	0.283117	0.164463	0.203637	-0.00272331	-0.0592352
SBDS	Nontoxin	Nontoxin	50.53	74.82	88.39	63.01	63.67	77.78	108.02	63.54	73.72	17.9941	0.244087	FALSE	753	0.201667	0	3	2	2	0	2	3	5	-1.09023	-1.03789	-0.814758	0.0891344	-0.416666	-0.0571427	-0.0406849	0.0857145	-0.0652629	0.133333	0.0282052	-0.0306075
SC35B1	Nontoxin	Nontoxin	73.46	141.3	152.47	50.37	85.66	77.07	146.93	94.19	102.681	38.7969	0.377838	FALSE	993	0.279166	0	2	0	0	0	0	2	2	-0.188546		-0.188546	-0.171506			0.002041		0.002041	-0.576923	0.111111	0.331016
SDA1	Nontoxin	Nontoxin	27.02	36.18	33.16	23.96	38.1	24.14	37.05	23.94	30.4438	6.30578	0.207129	FALSE	2076	0.217544	0	8	11	11	0	11	8	19	-1.11406	-1.35625	-0.602014	0.128979	-0.0111111	0.215185	0.162055	-0.190649	-0.0179046	0.155556	0.0180837	-0.00809016
Sec1	Nontoxin	Nontoxin	60.15	63.19	120.07	58.05	69.46	67.63	121.48	109.82	83.7312	28.0982	0.335576	FALSE	1899	0.191667	0	3	2	2	0	2	3	5	-1.19959	-1.49796	-0.627713	0.476863	0	0.6	0.454545	0.425455	0.0543478	0.533334	0.05	-0.0246386
SEC11A	Nontoxin	Nontoxin	48.49	160.58	74.99	84.43	83.23	145.87	70.04	71.75	92.4225	39.3024	0.425247	FALSE	540	0.191667	0	3	0	0	0	0	3	3	-1.05524		-1.05524	-0.0151515	0	-0.350649	-0.0498175	0.0857145	0.0177126	1.11022e-16	-0.0222222	-0.0871735
SEC11C	Nontoxin	Nontoxin	266.9	315.83	381.18	240.93	261.84	335.53	418.04	333.82	319.259	61.2422	0.191826	FALSE	534	0.391666	0	2	0	0	0	0	2	2	0.766969		0.766969	0.415923			0.479196		0.479196	0.25641	0.377777	0.662423
SEC13	Nontoxin	Nontoxin	111.69	107.88	167.72	80.01	101.67	104.16	136.53	105.67	114.416	26.4802	0.231437	FALSE	963	0.525	0	0	1	1	0	1	0	1	1.4737	1.4737		0.806723	0	-0.428571	0.742188		1	1	0.454545	0.859813
SEC14-2	Nontoxin	Nontoxin	48.13	32.19	33.9	64.8	46.94	50.57	86.22	59.22	52.7463	17.5059	0.331889	FALSE	2148	0.245833	0	9	3	3	0	3	9	12	-0.703905	-1.34917	-0.332598	0.199335	0.0476191	0.0857145	0.200759	-0.357328	0.300025	0.308333	0.0526252	0.106578
SEC20	Nontoxin	Nontoxin	31.11	38.65	42.38	22.36	34.33	54.66	53.6	22.56	37.4562	12.4333	0.331941	FALSE	687	0.179167	0	1	1	1	0	1	1	2	-1.03789	-0.448318	-1.16221	0.5	0	1		0.285714	0.131579	1	0	-0.0980741
Sec22b-B	Nontoxin	Nontoxin	39.77	111.1	66.11	121.86	124.88	119.04	106.91	110.41	100.01	30.5074	0.305043	FALSE	651	0.35	0	8	1	1	0	1	8	9	0.592701	-1.16221	0.918256	0.27699	0.416667	0.049214	0.33805	0.257143	0.106455	0.0166668	0.0771944	0.148151
Sec23A	Nontoxin	Nontoxin	67.7	64.63	87.61	54.28	76.57	80.09	109.21	66	75.7613	17.0051	0.224457	FALSE	2307	0.260119	0	10	4	4	0	4	10	14	-0.532239	-0.965781	-0.254097	0.0847748	0.223333	-0.252221	0.0944534	0.0986037	0.112602	-0.217094	0.015232	0.0422969
Sec61-a	Nontoxin	Nontoxin	528.95	724.99	837.27	603.98	563.37	434.37	987.73	1023.44	713.013	218.181	0.305999	FALSE	1431	0.241667	0	6	0	0	0	0	6	6	-0.678067		-0.678067	0.122951	0	0.285714	0.258778	-1	0.134218	-0.1	0.194445	0.24435
Sec61b	Nontoxin	Nontoxin	865.48	907.97	880.24	561.8	1003.96	594.73	1093.44	1060.44	871.008	198.731	0.228162	FALSE
Sec61g	Nontoxin	Nontoxin	3597.88	2809.83	3878.04	1266.31	1729.42	1021.37	4376.41	5791.79	3058.88	1663.06	0.543684	FALSE
SEC63	Nontoxin	Nontoxin	88.52	162.57	136.33	122.86	109.66	121.04	164.73	143.97	131.21	26.066	0.198659	FALSE	2277	0.388333	0	4	1	1	0	1	4	5	0.951016	0.155746	1.06719	0.0513003	0	0	0.0250194	0.214285	0.0947444	0.021756	0.0477778	0.196818
SecCarrierMem4	Nontoxin	Nontoxin	49.41	108.31	94.02	78.89	80.01	134.3	138.02	46.25	91.1513	34.6288	0.379905	FALSE	684	0.227083	0	6	2	2	0	2	6	8	-0.888623	-0.648609	-0.835818	-0.124765	-0.458333	-0.428571	0.0512836	-0.857143	0.0956914	-0.3	0.125	0.107925
Seipin	Nontoxin	Nontoxin	8.78	28.92	8.44	19.73	8.63	16.41	14.27	8.72	14.2375	7.32653	0.514594	FALSE	1212	0.305156	0	12	1	1	0	1	12	13	0.0113196	-1.0535	0.181016	0.0337047	-0.201094		0.0666667	-0.361203	0.0944482	0.0666667	0.00908718	0.0850078
Selen1X	Nontoxin	Nontoxin	34.06	49.21	43.92	42.58	31.15	49.74	80.66	56.5	48.4775	15.4266	0.318222	FALSE	279	0.361111	0	2	1	1	0	1	2	3	0.57472	0.155746	0.660801	0.241704	0.166667	0.077922	0.285334	-0.2	0.298415	-0.2	0.160606	0.094978
Selenium1	Nontoxin	Nontoxin	22.43	89.84	20.64	55.33	16.33	39.81	31	26.87	37.7812	24.4274	0.646547	FALSE	1416	0.254629	0	13	5	5	0	5	13	18	-0.618237	-0.160737	-0.755763	0.270741	-0.0499999	0.462748	0.0609617	0.204082	0.0392432	0.29697	0.0667642	-0.00492398
selenoproteinU	Nontoxin	Nontoxin	29.36	67.01	87.14	175.55	18.27	152.65	122.67	69.76	90.3012	56.162	0.621941	FALSE	249	0.233333	0	2	1	1	0	1	2	3	-0.654434	-0.448318	-0.57783	-0.177579	-0.166666	-0.428571	-0.0342105	-0.714286	0.0605263	-1	0.0555557	0.037686
SemialdehydeDH	Nontoxin	Nontoxin	38	48.57	55.55	52.01	34.02	54.87	64.38	59.93	50.9162	10.4104	0.204462	FALSE	1632	0.197619	0	1	6	6	0	6	1	7	-1.21301	-1.0409	-1.16221	0.019308	-0.111111	0.018182	0.00016932	0.124675	0.00016932	-0.00808067	0.00604686	0.0557602
Septin2-1	Nontoxin	Nontoxin	14.05	34.02	37.53	24.45	14.78	22.88	28.49	21.17	24.6713	8.39637	0.34033	FALSE	1050	0.338889	0	8	1	1	0	1	8	9	0.457292	0.649981	0.357501	0.180423	-0.1	0.44	0.232558	-0.364984	0.0105246	0.212121	0.114286	0.0639803
Septin7	Nontoxin	Nontoxin	49.53	88.37	71.2	38.54	40.69	36.01	60.5	90.03	59.3588	21.8685	0.368412	FALSE	1278	0.5	0	1	0	0	0	0	1	1	1.30896		1.30896	0.581818	0	1	1	-1	0.25		0.666667	0.387755
Sequestosome1	Nontoxin	Nontoxin	40.54	210.18	64.57	150.71	94.72	106.55	208.04	79.97	119.41	63.956	0.5356	FALSE	1365	0.254945	0	5	5	5	0	5	5	10	-0.604525	-0.748414	-0.31993	0.159886	-0.428571		-0.0156289	0.342857	0.186315	0.180437	0.107826	0.200571
SERCATPase2	Nontoxin	Nontoxin	25.93	46.25	29.31	14.84	35.28	59.27	46.38	18.47	34.4663	15.2934	0.44372	FALSE	3129	0.232083	0	20	0	0	0	0	20	20	-0.924764		-0.924764	0.0316738	0.0666667	0.192857	0.119749	-0.106493	0.0688535	-0.0724785	0.0688168	0.134964
SerHydMeT2	Nontoxin	Nontoxin	24.03	44.07	16.81	26.21	16.34	26.26	22.38	16.11	24.0262	9.16546	0.381477	FALSE	1509	0.335417	0	2	2	2	0	2	2	4	0.353489	0.200738	0.377685	0.0571668	-0.111111	-0.0239233	0.0042358	0.442424	0.0963311	0.0212122	0.081169	0.0368511
SerIncorporator3	Nontoxin	Nontoxin	16.18	45.98	31.87	23.38	24.5	25.73	39.82	27.82	29.41	9.56599	0.325263	FALSE	1374	0.175	0	1	3	3	0	3	1	4	-1.31182	-1.69654	0.155746	0.253638	0	0.215038	0.0556681	0.8	-0.0961538	0.422222	-0.05	0.00626583
SerineIncorp2	Nontoxin	Nontoxin	15.95	18.49	25.24	23.41	20.61	19.18	40.51	12.02	21.9262	8.56463	0.390611	FALSE	1359	0.255952	0	4	3	3	0	3	4	7	-0.530973	-1.69654	0.548135	0.419242	0	0.529023	0.336292	0.9	0.451923	0.216667	0.265306	0.168354
SerPalmitoyltransferaseA	Nontoxin	Nontoxin	120.43	144.45	149.35	92.74	113.24	140.03	146.37	89.43	124.505	24.2515	0.194784	FALSE
SerpinB6	Nontoxin	Nontoxin	84.51	84.38	128.88	80.88	90.84	102.62	145.05	119.48	104.58	23.9508	0.229019	FALSE	1140	0.220833	0	6	2	2	0	2	6	8	-0.96339	-1.03789	-0.756942	0.0572999	0	-0.132467	0.0435487	0.3	0.0901104	-0.0148148	0.064675	0.0799015
SerThr2Ba	Nontoxin	Nontoxin	20.58	29.94	18.36	24.77	6.43	21.85	37.7	20.15	22.4725	9.07553	0.40385	FALSE	1536	0.125	0	1	1	1	0	1	1	2	-1.49796	-1.16221	-1.16221	0	0			-0.428571	0.131579		0	-0.0640732
SerThrKin	Nontoxin	Nontoxin	23.59	42.9	31.82	25.98	21.99	32.91	45.23	34.77	32.3987	8.52117	0.263009	FALSE	1053	0.281667	0	5	0	0	0	0	5	5	-0.215413		-0.215413	0.0473806	-0.333333	0.018182	0.0878543	0.018182	0.0878543	0.186667	0.0733333	0.193129
SerThrKin-pim3	Nontoxin	Nontoxin	18.58	27.43	89.6	76.55	55.02	107.5	80.78	43.87	62.4162	31.2885	0.501289	TRUE	972	0.379167	0	2	0	0	0	0	2	2	0.660801		0.660801	0.32486	0	0.100478	0.144654	0.8	0.561358	0.333334	0.186147	0.0714287
SerThrKin-RAF	Nontoxin	Nontoxin	8.65	13.86	18.97	15.25	9.55	9.71	16	20.51	14.0625	4.46352	0.317406	FALSE	1932	0.161111	0	4	2	2	0	2	4	6	-1.59303	-1.03789	-1.54972	0.18749	-0.111111	0.0857145	0.0746458	0.342857	0.0177126	0.444445	0.0555557	-0.0548059
SerThrKin-VRK1	Nontoxin	Nontoxin	13.37	48.95	40.85	27.41	31.2	26.04	52.16	34.72	34.3375	12.7618	0.371658	FALSE	1272	0.125	0	3	0	0	0	0	3	3	-1.69654		-1.69654	-0.210526			-0.0961538		-0.0961538	-0.4	0	0.0989399
SerThrKin-VRK3	Nontoxin	Nontoxin	6.44	13.82	10.67	23.47	7.03	11.69	13.26	12.4	12.3475	5.25268	0.425404	FALSE	1275	0.298214	0	10	4	4	0	4	10	14	-0.0406638	0.310234	-0.202532	0.0848381	-0.0666666	0.0539684	0.156318	-0.0484756	0.0669056	-0.074074	0.104881	0.0899755
SerThrKin16	Nontoxin	Nontoxin	27.17	35.13	37.86	33.21	26.05	44.42	35	33.5	34.0425	5.8121	0.170731	FALSE	918	0.161111	0	4	2	2	0	2	4	6	-1.59303	-1.03789	-1.54972	-0.0849068	0	-0.428571	0.00310632	-0.428571	-0.0239057	-0.3	0.00396833	0.0481787
SerThrKin19	Nontoxin	Nontoxin	26.73	29.76	26.24	16.13	13.67	29.64	26.73	19.27	23.5213	6.25752	0.266037	FALSE	759	0.208333	0	2	2	2	0	2	2	4	-0.965781	-1.49796	-0.0823774	0.321594	0	0.6	0.75431	-0.085714	0.339156	0.666667	0.133333	0.164946
SerThrKinMST4	Nontoxin	Nontoxin	13.83	31.16	14.32	13.2	15.71	17.1	26.97	21.13	19.1775	6.68021	0.348336	FALSE	1248	0.230769	0	4	0	0	0	0	4	4	-0.755686		-0.755686	0.0542463	0.6		0.0777778	0.6	0.123017	-0.327273	0.13203	0.120955
SerThrKinNek6	Nontoxin	Nontoxin	31.29	67.54	42.74	41.68	32.82	51.51	40.71	42.41	43.8375	11.4466	0.261115	FALSE	933	0.335417	0	8	0	0	0	0	8	8	0.407346		0.407346	0.14647	0.0277778	0.102757	0.219471	0.0545455	0.0401092	0.259544	0.0449405	0.107474
SerThrKinULK3	Nontoxin	Nontoxin	13.43	19.88	9.95	22.15	12.7	19.17	18.13	13.58	16.1238	4.26437	0.264478	FALSE	1419	0.289941	0	9	4	4	0	4	9	13	-0.181539	-0.586198	0.056129	0.0259336	-0.0831167		0.0441078	-0.261595	0.0645319	-0.0220323	0.040839	0.102021
SerThrPKin-RIO3	Nontoxin	Nontoxin	22.88	64.44	71.54	58.99	26.46	28.94	52.84	59.98	48.2588	19.1605	0.397036	FALSE	1569	0.125	0	1	2	2	0	2	1	3	-1.69654	-1.49796	-1.16221	0.112831	0	0.6	-0.0961538	0.0857145	0.0177126	0.133333	0	-0.0097355
SerThrPP-2A-65Aa	Nontoxin	Nontoxin	23.82	48.07	39.77	40.8	36.43	42.3	55.51	32.9	39.95	9.53636	0.238707	FALSE	1770	0.27619	0	7	0	0	0	0	7	7	-0.294349		-0.294349	0.0415659	-0.333333	0.12	-0.11778	0.268421	-0.051868	-0.0380951	0.0520647	-0.0615772
SerThrPP-2Aa	Nontoxin	Nontoxin	30.53	56.82	60.69	51.01	34.78	48.22	55.75	39.84	47.205	11.0162	0.23337	FALSE	930	0.161111	0	3	0	0	0	0	3	3	-1.34917		-1.34917	0.263158	0	1	-0.0961538	0.285714	0.0177126	0.3	0	-0.0324028
SerThrPP-PP1a	Nontoxin	Nontoxin	31.89	78.2	52.39	76.13	40.09	63.69	51.76	41.66	54.4763	16.944	0.311034	FALSE	993	0.270833	0	4	0	0	0	0	4	4	-0.316959		-0.316959	0.241629	0.166667	0.2	0.328524	-0.272727	0.139167	0.109091	0.144231	0.125306
SerThrPP-PP1b	Nontoxin	Nontoxin	97.36	308.26	229.79	195.34	93.24	216.03	364.15	196.34	212.564	92.9784	0.437414	FALSE	984	0.161111	0	3	0	0	0	0	3	3	-1.34917		-1.34917	0.153544		0.6	-0.0961538	0.6	-0.0961538	0.088889	0.0555557	-0.0312068
SerThrPP-PP1g	Nontoxin	Nontoxin	21.95	45.03	19.9	26.74	18.77	23.65	27.91	20.84	25.5987	8.47755	0.331171	FALSE	957	0.125	0	2	0	0	0	0	2	2	-1.49796		-1.49796	0.54902		0.6		0.6		0.666667	0	-0.0640732
SerThrPP2A-b	Nontoxin	Nontoxin	51.92	93.27	84.41	79.12	55.38	76.2	114.43	66.72	77.6813	20.4386	0.263109	FALSE	930	0.425	0	2	0	0	0	0	2	2	1.05009		1.05009	0.74139	0	0.285714	0.742188	0.473684	0.565789	1	0.127273	0.457041
SerThrPP2A-Bd	Nontoxin	Nontoxin	22.02	42.35	30.75	28.26	23.02	33	37.06	21.98	29.805	7.47733	0.250875	FALSE	1362	0.233333	0	1	0	0	0	0	1	1	-0.448318		-0.448318	0.122137			0.172414		0.172414	8.88178e-17	0.166667	0.347826
SerThrPP4	Nontoxin	Nontoxin	13.03	19.99	14.23	19.52	14.77	24.17	20.6	14.84	17.6438	3.95359	0.224079	FALSE	924	0.233333	0	5	0	0	0	0	5	5	-0.743951		-0.743951	0.432938	0.5	0.6	-0.0961538	0.462857	0.425214	1.11022e-16	0.166667	0.0190579
SerThrPP6	Nontoxin	Nontoxin	11.09	23.97	12.05	15.66	13.26	20.56	13.35	14.16	15.5125	4.47461	0.288452	FALSE	918	0.247222	0	5	1	1	0	1	5	6	-0.614966	-1.16221	-0.324765	0.0006695	-0.05	-0.636363	0.087003	-0.25974	0.0628327	0.25641	0	-0.0143318
SerThrPP6-3	Nontoxin	Nontoxin	17.87	27.77	34.15	21.19	17.02	22.78	35.86	22.54	24.8975	7.06363	0.283709	FALSE	2616	0.171296	0	6	3	3	0	3	6	9	-1.58514	-0.707875	-1.7981	0.0817226	0.25	0.514285	0.0572258	0.0428572	0.0404711	-0.155556	0.0296297	0.0416662
SerumBinding-1	Nontoxin	Nontoxin	7.87	21.25	17.29	10.65	9.35	9.19	17.06	36.73	16.1737	9.60029	0.593573	FALSE	1224	0.222222	0	1	5	5	0	5	1	6	-0.898919	-1.25426	0.649981	0.23387	0.1	0.557895	0.247716	0.0857145	0.00790705	0.186667	0.0861112	0.099816
Seryl-tRNASyn	Nontoxin	Nontoxin	42.5	114.4	55.02	64.16	66.02	60.27	77.5	66	68.2338	21.1927	0.31059	FALSE	1545	0.232143	0	3	4	4	0	4	3	7	-0.809356	-1.54972	0.360954	0.0412008	0	0.369023	0.0561426	0.338961	-0.0100455	-0.16	0.12381	0.0158149
SF-3A3	Nontoxin	Nontoxin	32.84	64.74	24.86	53.96	37.53	67.29	60.32	52.34	49.235	15.6806	0.318485	FALSE	1506	0.250549	0	10	0	0	0	0	10	10	-0.312333		-0.312333	0.216048	0.171429		-0.177436	0.321804	0.152111	0.0188035	0.0209606	0.0681276
SF-U2AF	Nontoxin	Nontoxin	28.21	44.64	36.74	36.86	30.12	42.77	54.64	36.75	38.8413	8.45542	0.217692	FALSE	1401	0.245833	0	8	0	0	0	0	8	8	-0.66432		-0.66432	0.225808	0.214286	-0.272727	-0.013566	-0.134694	0.316498	-0.076923	0.0932541	0.0648359
SF18	Nontoxin	Nontoxin	15.97	26.55	24.72	21	20.2	17.91	41.33	22.9	23.8225	7.86781	0.330268	FALSE	1029	0.182639	0	11	1	1	0	1	11	12	-1.50493	-1.16221	-1.42273	0.017902	0.0277778	0.185715	-0.00303163	-0.114285	0.0797493	-0.0981684	0.0138889	0.0757336
SF45	Nontoxin	Nontoxin	11.77	29.87	15.73	26.1	19.03	27.88	23.78	22.71	22.1088	6.20698	0.280748	FALSE	1206	0.225	0	16	1	1	0	1	16	17	-1.00493	-0.448318	-1.00593	-0.0907229	-0.0694444	-0.361781	-0.00757103	-0.312842	-0.0280961	-0.165657	-0.0284314	0.0554943
sformylglutathioneHydrolase	Nontoxin	Nontoxin	70.58	71.72	84.39	66.67	33.39	59.54	77.09	78.9	67.785	15.8627	0.234016	FALSE	849	0.272917	0	3	1	1	0	1	3	4	-0.295332	-0.448318	-0.14674	-0.143025	0	0	-0.0380686	-0.285714	-0.105599	-0.3	-0.0505952	0.00618573
SFT2A	Nontoxin	Nontoxin	34.39	59.99	36.12	37.88	31.87	51.26	54.27	34.91	42.5862	10.8202	0.254077	FALSE	480	0.197222	0	2	1	1	0	1	2	3	-1.0018	-1.16221	-0.57783	0.004731	0	0.6	-0.0961538	-0.636363	0.0951417	0.133333	-0.047619	0.007603
SFT2B	Nontoxin	Nontoxin	17.3	30.03	30.95	9.13	19.5	20.55	29.71	19.21	22.0475	7.63332	0.346222	FALSE	483	0.379167	0	1	1	1	0	1	1	2	0.660801	1.4737	-0.448318	-0.102792	-0.166666	-0.428571	0.0259806	0	-0.0958075	0	0	0.0714287
SH3-1	Nontoxin	Nontoxin	135.66	279.97	217.58	192.93	152.75	162.06	267.05	175.84	197.98	52.9321	0.267361	FALSE	282	0.458333	0	3	0	0	0	0	3	3	1.50995		1.50995	0.0452393	0.122222	-0.272727	-0.197995	-0.533014	0.110578	-0.490909	-0.00925943	-0.0684106
SH3-2	Nontoxin	Nontoxin	48.45	57.58	107.6	52.82	38.69	129.37	81.5	60.13	72.0175	31.69	0.440032	FALSE	327	0.525	0	1	0	0	0	0	1	1	1.4737		1.4737	0.326656	0		0.75431	-1	-0.15748	0.666667	0.037037	0.450324
SH3-HSC84	Nontoxin	Nontoxin	31.96	40.14	21.4	43.55	16.27	30.13	32	17.74	29.1488	10.009	0.343378	FALSE	1002	0.222619	0	3	4	4	0	4	3	7	-0.920709	-1.03066	-0.494109	0.0923307	-0.25	-0.2	0.0769231	0.057143	0.126331	0.316667	0.0436508	0.040908
SH3P2	Nontoxin	Nontoxin	18.89	24.05	30.76	24.01	16.7	23.15	34.53	21.73	24.2275	5.873	0.24241	FALSE	645	0.125	0	1	0	0	0	0	1	1	-1.16221		-1.16221	-0.210526			-0.0961538		-0.0961538	-0.4	0	0.0989399
ShortCCA	Nontoxin	Nontoxin	6.29	12.89	27.23	13.96	10.44	9.25	29.99	27.13	17.1475	9.40949	0.548738	FALSE
SialicAcidSyn	Nontoxin	Nontoxin	10.61	12.98	15.08	20.51	12.38	14.61	26.09	8.51	15.0963	5.67915	0.376196	FALSE	1080	0.165	0	2	3	3	0	3	2	5	-1.49119	-1.05524	-1.49796	0.100713	0	0.0857145	0.151997	-0.171428	0.0289823	0.333334	-0.0133333	-0.0380779
SignalPeptidase3	Nontoxin	Nontoxin	326.72	582.96	272.76	483.37	373.55	543.77	514.29	421.77	439.899	109.646	0.249252	FALSE
SignalRec54	Nontoxin	Nontoxin	85.13	103.95	223.55	93.45	131.04	140.33	180.56	101.88	132.486	48.0845	0.362939	FALSE	1515	0.291666	0	6	0	0	0	0	6	6	-0.110161		-0.110161	0.32152	0.166667	0.554286	0.387854	0.438961	0.298965	0.088889	0.291005	0.182838
SignalRec9	Nontoxin	Nontoxin	57.08	99.35	64.35	92.75	91.96	61.05	83.84	93.05	80.4287	16.8733	0.209792	FALSE	261	0.125	0	1	0	0	0	0	1	1	-1.16221		-1.16221	-0.210526			-0.0961538		-0.0961538	-0.4	0	0.0989399
SignalRecPart-a	Nontoxin	Nontoxin	62.82	96.51	95.85	73.38	98.21	90.52	63.85	61.75	80.3612	16.466	0.204899	FALSE	1947	0.25	0	8	3	3	0	3	8	11	-0.643945	-0.17346	-0.76401	0.0624819	-0.0238094	0.083117	0.137905	-0.117857	0.0954335	-0.0354977	0.0829878	0.076169
SigPep1	Nontoxin	Nontoxin	546.65	926.12	869.56	650.63	504.48	818.52	1009.47	773.49	762.365	180.542	0.236818	FALSE	306	0.325	0	1	0	0	0	0	1	1	0.155746		0.155746	0.465116			0.454545		0.454545	0.4	0.333333	0.571429
SIRT1	Nontoxin	Nontoxin	9.25	18.38	20.21	12.41	10.65	16.98	18.15	10.6	14.5787	4.2936	0.294511	FALSE	426	0.125	0	2	0	0	0	0	2	2	-1.49796		-1.49796	-0.105263	0	-0.428571	0.0177126		-0.0961538	-0.4	0	0.0174334
Sirtuin2	Nontoxin	Nontoxin	19.68	43.68	23.96	40.3	18.01	25.47	30.25	24.14	28.1863	9.32418	0.330806	FALSE	1065	0.240476	0	12	3	3	0	3	12	15	-0.878811	-1.34917	-0.58411	-0.000470657	-0.0121212	0.092159	0.046639	-0.118797	0.0586587	-0.530303	0.068254	0.00647118
Sirtuin5	Nontoxin	Nontoxin	19.91	30.95	31.18	32.61	22.29	27.59	46.3	31.13	30.245	7.95212	0.262924	FALSE	927	0.286111	0	2	1	1	0	1	2	3	-0.14674	-0.448318	0.0945699	0.0407123	0.25	0.6	0.0539641	0.057143	-0.0818246	-0.4	0.0555557	-0.0855445
Sjoegren	Nontoxin	Nontoxin	31.14	58.72	31.94	77.75	41.74	98.77	46.51	67.82	56.7987	23.7085	0.417412	FALSE	594	0.0476191	0	4	3	3	0	3	4	7	-1.17552	-0.912045	-0.912045					0.6		0.666667	-0.123967	-1.14492e-16
SjoegrenSNA1	Nontoxin	Nontoxin	18.38	6.69	2.35	55.39	20.29	75.77	42.01	39.57	32.5562	25.2425	0.77535	TRUE	354	0.530303	0	0	1	1	0	1	0	1	1.43099	1.43099						0.473684	-0.176211	0.444444	-0.107692	-0.166667
SLC25-39	Nontoxin	Nontoxin	23.57	37.87	25.08	12.51	20.46	18.4	25.45	25.55	23.6113	7.29908	0.309136	FALSE	1068	0.270833	0	4	2	2	0	2	4	6	-0.346789	-0.57783	-0.122313	0.183961	0	0.6	0.250746	-0.466667	0.250497	0.166667	0.172222	0.192503
SLC41-2	Nontoxin	Nontoxin	110.89	140.92	155.43	112.74	87.83	141.82	183.04	145.76	134.804	29.8187	0.2212	FALSE	1725	0.346875	0	6	2	2	0	2	6	8	0.544419	0.200738	0.59972	-0.00446392	0.00952386	0.348371	-0.0934478	-0.619047	-0.0837363	0.063248	-0.0662038	-0.0531204
Slowmo1	Nontoxin	Nontoxin	8.72	16.31	18.29	11.85	9.16	8.3	19.98	16.23	13.605	4.65437	0.342107	FALSE	558	0.125	0	0	1	1	0	1	0	1	-1.16221	-1.16221		0	0			-0.428571	0.131579		0	-0.0640732
Slowmo2	Nontoxin	Nontoxin	6.12	20.65	24.35	17.19	18.35	21.46	32.04	10.83	18.8738	7.96109	0.421807	FALSE	585	0.289583	0	2	2	2	0	2	2	4	-0.122313	-0.330104	0.129959	0.224914	-0.0666665	0.215038	0.24613	-0.085714	0.042594	0.222222	0.118056	0.109013
SLU7	Nontoxin	Nontoxin	31.13	55.05	61.81	39.14	28.32	41.25	57.24	83.9	49.73	18.4647	0.3713	FALSE	1737	0.188542	0	6	2	2	0	2	6	8	-1.34969	-0.188546	-1.62458	-0.0528053	0	-0.085714	-0.0042436	-0.350649	-0.0042436	-0.2	0.0154762	0.0597802
SmallCellAdh	Nontoxin	Nontoxin	32.11	37.48	53.89	40.98	32.49	17.04	63.68	57.08	41.8438	15.4519	0.369276	FALSE	291	0	0	2	0	0	0	0	2	2
SmallUbMod1	Nontoxin	Nontoxin	70.82	90.8	79.78	59.9	56.84	75.92	71.29	68.58	71.7413	10.8142	0.150739	FALSE
SmD3	Nontoxin	Nontoxin	106.61	84.48	6.14	282.72	128.46	287.88	236.72	306.08	179.886	112.565	0.625758	FALSE
snRNA-LSm2	Nontoxin	Nontoxin	28.63	66.4	36.86	27.12	25.09	22.23	44.76	45.56	37.0812	14.7624	0.398108	FALSE	288	0.125	0	2	0	0	0	0	2	2	-1.49796		-1.49796	0	0			-0.428571	0.131579		0	-0.0640732
snRnpE	Nontoxin	Nontoxin	89.79	123.02	123.77	76.35	58.63	104.63	78.64	88.98	92.9762	22.9111	0.246419	FALSE
SNRp-SmD2	Nontoxin	Nontoxin	39.79	99.81	83.23	60.45	47.84	67.51	73.23	64.87	67.0913	19.0257	0.28358	FALSE	357	0.330555	0	3	0	0	0	0	3	3	0.280792		0.280792	0.233006	0	0.714286	-0.118797	0.285714	-0.0211355	0.148148	-0.0277778	0.0742727
Sol45m3	Nontoxin	Nontoxin	27.44	41.8	56.24	28.58	28.76	37.82	59.71	43.18	40.4412	12.44	0.307607	FALSE	1713	0.215151	0	8	3	3	0	3	8	11	-1.08082	0.441116	-1.62384	0.182182	0.0714286	0.056772	-0.0205016	0.171429	0.150118	0.228572	0.00865809	-0.00122137
SolCarr30	Nontoxin	Nontoxin	104.31	102.86	136.24	118.23	78.79	81.63	147.49	195.96	120.689	38.7283	0.320894	FALSE	1383	0.191667	0	1	2	2	0	2	1	3	-1.05524	-1.49796	0.155746	-0.0589709	-0.166666	-0.272727	0.0177126	-0.350649	0.0556681	0.133333	-0.0222222	0.0717966
SolCarr39	Nontoxin	Nontoxin	134.21	67.45	169.39	235.11	236.93	57.84	363.56	349.04	201.691	116.24	0.576328	FALSE	2067	0.269643	0	7	7	7	0	7	7	14	-0.409346	-0.419621	-0.322187	-0.0524943	-0.166667	0.0676691	0.0227502	-0.423559	-0.0166242	-0.135556	0.0119049	0.00715511
SolCarr40m1	Nontoxin	Nontoxin	35.09	22.51	35.76	52.15	15.29	20.79	34.64	48.5	33.0913	13.0622	0.394733	FALSE	1734	0.211458	0	7	2	2	0	2	7	9	-1.4218	-0.330104	-1.69167	0.0301393	0.166667	0.333333	0.00793783	0.333333	0.0160201	-0.230769	0.0616988	0.0402789
Somatostatin2	Nontoxin	Nontoxin	20.88	36.47	28.02	19	5.84	22.42	22.92	27.47	22.8775	8.79777	0.38456	FALSE	1119	0.233333	0	2	1	1	0	1	2	3	-0.654434	-0.448318	-0.57783	0.122137			0.172414		0.172414	8.88178e-17	0.166667	0.347826
Sortilin	Nontoxin	Nontoxin	22.3	34.62	35.59	26.97	26	32.11	64.31	38.59	35.0613	13.025	0.371492	FALSE	2373	0.268518	0	6	3	3	0	3	6	9	-0.400303	-1.05524	0.0633654	0.127503	0.02	0.134928	0.229092	-0.164502	0.00770545	0.0777778	0.0895062	0.0645424
Sorting50	Nontoxin	Nontoxin	25.13	42.51	36.13	27.8	26.7	39.54	46.72	28.33	34.1075	8.21071	0.24073	FALSE	1410	0.240833	0	6	4	4	0	4	6	10	-0.749116	-1.31182	-0.189037	0.155667	0.255556	0.124675	0.0481139	0.145357	0.133635	0.00659357	0.0192613	0.0550593
SOSS-C	Nontoxin	Nontoxin	115.38	93.6	121.11	66.04	64.77	89.41	115.56	87.36	94.1537	21.9029	0.23263	FALSE	315	0.125	0	1	0	0	0	0	1	1	-1.16221		-1.16221	-0.210526			-0.0961538		-0.0961538	-0.4	0	0.0989399
SPARC	Nontoxin	Nontoxin	259.48	138.43	270.05	61.6	45.26	114.9	81.78	41.45	126.619	91.5052	0.722683	TRUE	897	0.29375	0	2	2	2	0	2	2	4	-0.0790584	0.200738	-0.330104	0.0242227	-0.075	-0.090909	0.170308	-0.567099	0.179769	-0.181818	0.0833334	0.00591727
SpermAntigen7	Nontoxin	Nontoxin	3.67	0.8	0.42	23.39	11.42	26.5	17.46	31.2	14.3575	12.0903	0.842092	TRUE	678	0	0	1	0	0	0	0	1	1
SpermSynth	Nontoxin	Nontoxin	29.38	26.33	36.97	34.43	16.99	32.34	38.5	34.04	31.1225	6.92084	0.222374	FALSE	1098	0.251389	0	3	3	3	0	3	3	6	-0.567641	-1.34917	0.387675	0.004824	0	-0.515151	0.139218	0	0.16453	0.0266668	0.074224	0.165677
SPF27	Nontoxin	Nontoxin	86.32	132.47	130.24	98.84	97.26	139.99	136.59	94.19	114.488	22.2243	0.19412	FALSE	678	0.275	0	4	0	0	0	0	4	4	-0.273705		-0.273705	0.52447		0.6	0.602041	0.6	0.602041	0.461539	0.269841	0.301127
SPhaseKin	Nontoxin	Nontoxin	75.16	176.4	106.29	98.56	85.72	86.97	145.08	114.77	111.119	34.0811	0.306709	FALSE
Sphingosine1	Nontoxin	Nontoxin	8.32	26.6	17.63	19.3	13.82	16.15	19.15	8.59	16.195	6.02602	0.372092	FALSE	1677	0.125	0	3	1	1	0	1	3	4	-1.83088	-1.16221	-1.69654	0.359133		0.6	-0.0961538	0.6	-0.0961538	0.4	0	-0.0233199
SpindlinZ	Nontoxin	Nontoxin	13.95	33.25	18.38	19.18	10.73	17.78	18.63	18.33	18.7788	6.53624	0.348066	FALSE	789	0.4	0	1	0	0	0	0	1	1	0.649981		0.649981	0.258065			0.368421		0.368421	0	0.333333	0.634146
Spinster1	Nontoxin	Nontoxin	10.7	28.34	15.54	12.6	15.33	15.83	38.25	16.23	19.1025	9.34059	0.488972	FALSE	1563	0.202381	0	7	0	0	0	0	7	7	-1.15733		-1.15733	-0.135599	0	0.163636	-0.0928137	0.0666667	-0.0730769	-0.355556	0.00340143	0.0530914
Splicing3B-5	Nontoxin	Nontoxin	18.41	49.67	26.22	54.25	20.19	61.05	47.91	47.37	40.6338	16.4829	0.405645	FALSE	261	0.142857	0	2	0	0	0	0	2	2	-1.35784		-1.35784	0.0927495			-0.4	0.6	-0.0961538	0.133333	-0.044586	0.0061623
SqualeneSyn	Nontoxin	Nontoxin	5.45	39.89	9.47	13.24	14.78	22.55	52.88	18.22	22.06	16.2479	0.736532	FALSE	1257	0.258333	0	2	1	1	0	1	2	3	-0.413947	-1.16221	0.200738	0.155177	0	0	-0.15748	0.0225565	0.0556681	0.3	-0.133333	-0.0975355
SS182	Nontoxin	Nontoxin	42	25.85	24.3	53.28	17.74	38.53	72.73	36.82	38.9062	17.7141	0.455303	FALSE
ST3Gal-IV	Nontoxin	Nontoxin	117.26	100.97	109.71	92.94	122.72	98.51	126.6	199.42	121.016	33.848	0.279698	FALSE	999	0.458333	0	1	0	0	0	0	1	1	1.03439		1.03439	0.209765		0.6	0.368421	0.6	0.368421	-1.11111	0.533333	0.40989
stAR-LipidTransfer5	Nontoxin	Nontoxin	7.68	24.67	25.06	30.11	8.76	9.01	11.49	8.73	15.6888	9.25251	0.589754	FALSE	633	0.175	0	4	0	0	0	0	4	4	-1.31182		-1.31182	-0.0589415	0.25	0.428571	-0.0187069	-0.428571	-0.0392206	-0.4	-0.0166667	0.00010815
stAR3	Nontoxin	Nontoxin	16.81	23.18	18.31	8.46	8.64	15.58	19.73	20.55	16.4075	5.37227	0.327428	FALSE	1329	0.125	0	1	0	0	0	0	1	1	-1.16221		-1.16221	-0.210526			-0.0961538		-0.0961538	-0.4	0	0.0989399
stAR4	Nontoxin	Nontoxin	5.22	11.23	6.15	7.33	10.89	7.1	34.17	2.64	10.5913	9.93606	0.938138	FALSE	624	0.225	0	0	2	2	0	2	0	2	-0.648609	-0.648609		-0.065574	-0.25	-0.428571	0.131579	-0.714286	0.19079		0.111111	-0.0049017
Stathmin	Nontoxin	Nontoxin	201.23	284.81	248.54	167.3	128.41	203.92	214.18	126.87	196.908	55.0749	0.279699	FALSE
STE20-2	Nontoxin	Nontoxin	12.11	17.31	10.11	32.21	9.36	14.27	20.47	18.18	16.7525	7.38328	0.440727	FALSE	1569	0.39899	0	3	0	0	0	0	3	3	0.853803		0.853803					-0.636363	-0.0932413	-0.162393	-0.168697	0.0277777
SterolReductase	Nontoxin	Nontoxin	32.13	106.54	60.37	80.94	68.84	101.44	182.29	90.28	90.3538	44.2035	0.489227	FALSE	1551	0.251042	0	5	3	3	0	3	5	8	-0.602014	-0.413947	-0.598147	0.0282744	-0.166666	0.451128	0.0881458	0.0225565	0.0351487	-0.0918193	0.103671	0.21293
StessInduced1	Nontoxin	Nontoxin	24.91	72.24	32.69	59.69	46.62	55	72.89	47.92	51.495	17.1734	0.333497	FALSE	1632	0.198039	0	15	2	2	0	2	15	17	-1.35972	-1.49796	-1.21652	-0.0588215	0.0583333	-0.033766	-0.102822	-0.374262	0.0694359	-0.382716	0.00577466	0.0146627
StressER1	Nontoxin	Nontoxin	472.81	409.62	83.37	744.09	738.35	1038.6	650.85	487.94	578.204	283.585	0.490459	FALSE	201	0.233333	0	1	0	0	0	0	1	1	-0.448318		-0.448318	0	0			-1	0.25		0	-0.132075
StromMemGTPase	Nontoxin	Nontoxin	17.53	43.66	18.43	27.98	27.94	35.85	39.28	29.45	30.015	9.29614	0.309716	FALSE	1368	0.197222	0	1	2	2	0	2	1	3	-1.0018	-1.03789	-0.448318	-0.0996383	0	-0.428571	-0.0516513		-0.0066312	-0.266667	0.00793667	0.106093
SuccCoALig	Nontoxin	Nontoxin	36.29	55.48	52.46	60.14	44.35	66.21	63.39	42.95	52.6587	10.6503	0.20225	FALSE	996	0.266667	0	4	1	1	0	1	4	5	-0.379442	-0.448318	-0.273705	0.0161261	0	0.163636	0.0561107	0.163636	0.10064	-0.16	0.12303	0.184825
SuccinylCoALig-b	Nontoxin	Nontoxin	24.43	52.94	48.29	37.93	39.97	47.28	44.61	30.15	40.7	9.63796	0.236805	FALSE	1404	0.209722	0	3	3	3	0	3	3	6	-1.0409	-0.413947	-1.34917	-0.063754	-0.25	-0.714286	0.0442553	0	0.0951813	-0.3	0.12037	0.146573
Succinyltransferase	Nontoxin	Nontoxin	25.79	37.79	29.32	28.33	20.93	32.81	44.47	40.12	32.445	7.89024	0.243188	FALSE	1398	0.39375	0	1	3	3	0	3	1	4	0.959056	1.10913	0.155746	0.329847	0	0.0857145	0.412832	0.077922	0.429399	0.096866	0.371843	0.467314
Sulfatase2	Nontoxin	Nontoxin	35.74	79.07	54.44	40.15	52.17	68.47	88.91	45.33	58.035	19.0124	0.327603	FALSE	966	0.282407	0	6	3	3	0	3	6	9	-0.231041	-1.05524	0.299993	0.218449	0.0833333	0.445614	0.294579	0.160191	0.102097	-0.0148148	0.165803	0.125943
Sulfotransferase1A1	Nontoxin	Nontoxin	68.4	349.29	185.58	51.14	131.21	80.91	281.15	175.99	165.459	105.901	0.640043	FALSE	888	0.351667	0	4	1	1	0	1	4	5	0.550056	1.30896	0.137215	-0.0179469	-0.125	0.511278	0.032045	-1	-0.180716	-0.1	-0.0403508	-0.0187019
Sulfotransferase6B1	Nontoxin	Nontoxin	11.67	43.18	29.57	16.67	12.44	22.96	28.27	18.03	22.8488	10.5738	0.462775	FALSE	939	0.143056	0	1	5	5	0	5	1	6	-1.7981	-1.69167	-1.16221	-0.0498192	0	0.6	-0.0961538	-0.171428	0.0177126	-0.266667	0.0277778	-0.0204711
SulfurTransferase	Nontoxin	Nontoxin	14.27	25.04	23.41	19.67	8.66	19.14	14.09	13.6	17.235	5.52957	0.320834	FALSE
SUMO-UBC9-B	Nontoxin	Nontoxin	30.32	84.54	21.74	35.15	42.73	47.45	34.61	36.72	41.6575	18.9558	0.455039	FALSE
SuperoxideDismutase	Nontoxin	Nontoxin	173.04	243.92	179.19	93.69	36.5	143.41	159.25	195.4	153.05	63.665	0.415975	FALSE	480	0.202083	0	2	2	2	0	2	2	4	-1.03066	-1.49796	-0.188546	0.11195	-0.5	0.285714	-0.0202429	0	0.0192308	0.0666667	0.0555555	0.0300187
SuperoxideDismutaseCu	Nontoxin	Nontoxin	18.19	26.82	12.66	40.23	20.59	25.56	36.24	35.68	26.9963	9.72624	0.360281	FALSE	831	0.368742	0	4	5	5	0	5	4	9	0.778314	0.894107	0.43073	0.0431211	0.150376		0.0222222	0.157465	-0.0117756	-0.515488	0.130759	-0.00961167
SuperoxideDismutaseMn	Nontoxin	Nontoxin	37.66	46.97	43.13	35.55	25.27	30.61	31.86	30.32	35.1713	7.19353	0.204529	FALSE	678	0.271667	0	1	4	4	0	4	1	5	-0.324765	-0.965781	1.4737	0.163397	0	0.8	0.28084	0.390476	0.250988	-0.345454	0.291429	0.213282
Surfeit4	Nontoxin	Nontoxin	140.49	197.42	122.08	133.81	120.61	179.4	146.94	74.64	139.424	37.6118	0.269766	FALSE	810	0.331481	0	8	1	1	0	1	8	9	0.367019	1.4737	0.0708925	0.156768	0	-0.296241	0.119362	0.714286	0.354392	-0.56	0.290188	0.195082
Surfeit4-1	Nontoxin	Nontoxin	30.81	50.39	51.41	35.94	42.36	57.26	55.53	30.18	44.235	10.9328	0.247154	FALSE	813	0.4125	0	2	0	0	0	0	2	2	0.943917		0.943917	0.628954	0.5	1	0.727272	0.428571	0.50505	0.4	0.527778	0.512641
SurfLoc1	Nontoxin	Nontoxin	14.76	18.03	16.72	15.89	10.34	15.3	11.72	11.62	14.2975	2.75238	0.192508	FALSE	927	0.186111	0	6	3	3	0	3	6	9	-1.40459	-1.69654	-0.962019	-0.214181	0	-0.428571	-0.0561193	-0.714286	-0.152652	-0.536264	-0.026455	0.0657389
SurvivalMotorNeuron1	Nontoxin	Nontoxin	14.9	22.5	17.17	17.48	16.78	18.52	35.13	20.54	20.3775	6.40587	0.31436	FALSE	795	0.197619	0	5	2	2	0	2	5	7	-1.21301	-1.49796	-0.816852	-0.129862	0.5	0.6	-0.0726221	0.514285	-0.0394306	-0.454545	0.0380952	0.0739254
SWEET1	Nontoxin	Nontoxin	55.28	179.39	45.16	109.92	45.99	75.07	47.5	61.05	77.42	46.5089	0.600735	FALSE	660	0.242857	0	11	3	3	0	3	11	14	-0.754985	-0.467388	-0.767411	0.168264	0.166667	0.243108	0.188738	0.11594	0.14497	-0.102164	0.10928	0.00550685
SWI-SNFRegulator-E1	Nontoxin	Nontoxin	20.12	36.94	36.1	13.17	18.27	14.93	31.14	29.81	25.06	9.5397	0.380675	FALSE	1239	0.252778	0	3	0	0	0	0	3	3	-0.467388		-0.467388	-0.0482653	0	-0.428571	0.151997	-1	-0.036597	8.88178e-17	-0.074074	-0.125308
SWI41	Nontoxin	Nontoxin	10.4	25.82	32.96	20.71	15.91	32.64	20.06	23.39	22.7362	7.76986	0.341739	FALSE	1620	0.336111	0	5	4	4	0	4	5	9	0.423439	-1.11717	1.62536	0.279702	-0.1	0.306123	0.446896	-0.10303	0.398368	0.187546	0.322346	0.323012
SynapseAss	Nontoxin	Nontoxin	34.77	58.11	32.46	76.11	33.95	33.03	62.91	64.91	49.5312	17.8081	0.359534	FALSE	462	0.125	0	1	0	0	0	0	1	1	-1.16221		-1.16221	-0.210526			-0.0961538		-0.0961538	-0.4	0	0.0989399
Synaptobrevin	Nontoxin	Nontoxin	28.54	68.34	66.45	29.32	58.01	31.51	48.78	32.27	45.4025	17.1045	0.376729	FALSE	597	0.125	0	1	0	0	0	0	1	1	-1.16221		-1.16221	0	0	-0.428571	0.131579				0	-0.0640732
Synaptobrevin1	Nontoxin	Nontoxin	11.68	36.4	23.97	19.92	19.99	34.61	35.07	14.87	24.5637	9.66733	0.393561	FALSE	663	0.351667	0	5	0	0	0	0	5	5	0.550056		0.550056	0.226165	0.0833335	-0.428571	0.173688	-0.127819	0.368574	0.17094	0.127778	0.276945
Synaptogyrin2	Nontoxin	Nontoxin	111.32	139.27	105.09	108.8	111.8	132.12	133.19	103.29	118.11	14.3087	0.121148	FALSE	681	0.125	0	1	1	1	0	1	1	2	-1.49796	-1.16221	-1.16221	-0.105263	0	-0.428571	0.0177126		-0.0961538	-0.4	0	0.0174334
Synaptojanin2	Nontoxin	Nontoxin	10.5	8.96	10.22	17.39	7.92	13.11	23.42	10.99	12.8137	5.17866	0.404149	FALSE	444	0.125	0	2	1	1	0	1	2	3	-1.69654	-1.16221	-1.49796	-0.140351	0	-0.428571	-0.0202429		-0.0961538	-0.4	0	0.0446022
SynaptosomalAssoc29	Nontoxin	Nontoxin	12.96	20.35	25.36	19.49	13.97	23.05	30.26	18.89	20.5412	5.71331	0.278138	FALSE	771	0.348333	0	5	1	1	0	1	5	6	0.115588	0.649981	-0.17346	-0.0562589	0	0.0857145	0.170718	-0.38961	-0.199472	-0.192307	-0.00136754	0.0877681
Synaptotagmin7	Nontoxin	Nontoxin	16.63	25.86	14.03	11.26	13.31	18.29	26.49	14.76	17.5787	5.70818	0.324721	FALSE	1209	0.179167	0	2	0	0	0	0	2	2	-1.03789		-1.03789	0.11236	0	0.6		-0.350649	0.131579	0.666667	-0.0714285	-0.00406455
Syndecan4	Nontoxin	Nontoxin	10.27	17.71	13.06	15.59	8.77	8.21	24.96	19.96	14.8163	5.88313	0.397073	FALSE
Syntaxin5	Nontoxin	Nontoxin	19.24	28.63	13.75	19.57	17.55	15.38	25.96	38.05	22.2662	8.12303	0.364814	FALSE	1059	0.304695	0	9	2	2	0	2	9	11	0.00536395	-1.35784	0.439329	0.214007	-0.109364		0.0916668	-0.0651693	0.137261	0.237037	0.020487	0.106475
Syntaxin7	Nontoxin	Nontoxin	14.64	31.92	27.67	13.95	19.68	21.36	34.37	24.6	23.5238	7.52635	0.319947	FALSE	783	0.233333	0	0	1	1	0	1	0	1	-0.448318	-0.448318		-0.4375			-0.2		-0.2	-1	0	0.189189
syntaxin8	Nontoxin	Nontoxin	19.09	32.79	37.71	25.47	22.06	42.77	35.25	20.17	29.4138	8.89892	0.302543	FALSE	711	0.244047	0	3	4	4	0	4	3	7	-0.670165	-0.23045	-1.0018	0.249287	0.125	0.271169	0.152679	0.21974	-0.00148407	0.266667	0.00680286	0.0267732
SyntaxinBinding2	Nontoxin	Nontoxin	12.47	22.47	10.83	23.57	21.45	14.83	33.1	16.79	19.4387	7.24925	0.372928	FALSE	1773	0.24697	0	11	0	0	0	0	11	11	-0.681935		-0.681935	0.0292278	0	0.342857	0.0926675	-0.4	0.0483624	-0.0787878	0.0518038	0.15952
Syntenin1-1	Nontoxin	Nontoxin	18.79	36.73	32.44	42.58	17.39	21.85	24.31	31.86	28.2437	9.03771	0.31999	FALSE	891	0.291666	0	1	1	1	0	1	1	2	-0.0823774	-1.16221	1.03439	0.150056	0	0.428571	0.229701	0.473684	0.323017	-0.4	0.3	0.233093
TATABinding1	Nontoxin	Nontoxin	12.85	34.2	24.21	21.17	17.68	23.3	35.37	22.76	23.9425	7.6311	0.318726	FALSE	552	0.2625	0	2	0	0	0	0	2	2	-0.330104		-0.330104	0.393715	0	0.3	0.555556	0.163636	0.131579	0.666667	0.0384615	0.122927
TBC1-17	Nontoxin	Nontoxin	36.39	43.25	33.47	19.23	30.67	19.42	39.4	49.03	33.8575	10.6118	0.313425	FALSE	1962	0.327976	0	9	5	5	0	5	9	14	0.34338	-0.762176	0.976362	0.116152	0.125	0.113886	0.0381156	0.636364	0.234749	-0.349311	0.191043	0.0492509
TBC1fm7	Nontoxin	Nontoxin	9.99	17.74	18.08	20	8.32	12.53	8.72	19.28	14.3325	4.9571	0.345864	FALSE	882	0.125	0	1	2	2	0	2	1	3	-1.69654	-1.49796	-1.16221	-0.0701753	0	-0.428571	0.0177126	-0.428571	0.0177126	-0.4	0	-0.0097355
TCAM1	Nontoxin	Nontoxin	310.26	463.9	514.47	442.79	530.94	394.1	696.52	663.97	502.119	130.071	0.259044	FALSE	1122	0.125	0	3	0	0	0	0	3	3	-1.69654		-1.69654	-0.140351	0		-0.0961538	-0.428571	-0.0202429	-0.4	0	0.0446022
tcellImm	Nontoxin	Nontoxin	34.12	89.97	49.54	53.88	48.55	66.4	64.97	28	54.4288	19.5933	0.359982	FALSE	1848	0.285548	0	8	5	5	0	5	8	13	0.0139883	-0.833053	0.658337					-0.0874327	0.171791	-0.0636753	0.165857	0.0937501
tcomp1b	Nontoxin	Nontoxin	56.19	60.85	151.41	59.04	61.17	89.23	123.66	67.66	83.6513	35.5848	0.425394	FALSE	1608	0.394444	0	3	0	0	0	0	3	3	0.895369		0.895369	0.198497	-0.111111	0.163636	0.575456	-0.324675	0.30826	1.11022e-16	0.282828	0.274121
Tcomp1theta	Nontoxin	Nontoxin	67.43	82.52	173.81	84.34	84.71	125.23	193.3	101.72	114.132	46.3525	0.406129	FALSE	1647	0.405	0	5	0	0	0	0	5	5	1.13327		1.13327	0.538162		0.6	0.615252	0.6	0.615252	0.283637	0.580952	0.548856
TComplex-1d	Nontoxin	Nontoxin	76.23	117.61	187.03	131.16	86.06	100.25	288.06	283.06	158.682	85.3088	0.537607	FALSE	1632	0.345833	0	4	0	0	0	0	4	4	0.461626		0.461626	0.0041759	0	-0.567099	-0.188302	0.190476	0.188035	-0.327273	0.0612553	-0.0347788
TComplex1-z	Nontoxin	Nontoxin	65.94	184.61	245.17	169.86	59.04	129.04	132.76	146.36	141.597	61.149	0.431851	FALSE	1593	0.201667	0	4	1	1	0	1	4	5	-1.09023	-1.16221	-0.836016	0.283981	0	0.542857	0.210605	0.542857	0.210605	0.233333	0.133333	0.125709
TComplex1a	Nontoxin	Nontoxin	111.05	173.5	225.66	209.9	104.93	126.27	317.62	342.49	201.427	90.9998	0.451775	FALSE	1677	0.294792	0	8	0	0	0	0	8	8	-0.0786423		-0.0786423	0.0288965	-0.5	-0.428571	-0.260961	-0.214285	-0.057839	0.279854	-0.0538995	-0.0574744
TComplex1e	Nontoxin	Nontoxin	86.67	116	166.46	104.56	89.02	122.33	248.99	187.99	140.252	56.6553	0.403952	FALSE	1626	0.369048	0	7	0	0	0	0	7	7	0.791342		0.791342	0.0840274	-0.2	0.24812	0.134569	0.28421	0.106238	-0.151567	0.174964	0.104097
TComplex1eta	Nontoxin	Nontoxin	41.74	53.2	20.33	48.67	41.71	59.95	102.44	51.58	52.4525	23.399	0.4461	FALSE	1635	0.33165	0	15	3	3	0	3	15	18	0.303117	0.663789	0.178032					0.257143	0.16514	-0.132343	0.0410723	0.185816
TComplex1g	Nontoxin	Nontoxin	55.27	106.32	66.13	88.95	68.35	111.11	123.1	67.69	85.865	25.1121	0.29246	FALSE	1638	0.351852	0	4	5	5	0	5	4	9	0.61527	0.659408	0.396744	0.389726	0.214286	0.778947	0.58732	0.148052	0.302152	0.148148	0.364815	0.226988
TCTP	Nontoxin	Nontoxin	656.13	2711.84	1030.2	1716.14	1019.39	1056.68	1762.86	2920.41	1609.21	833.827	0.51816	FALSE	519	0.3125	0	2	0	0	0	0	2	2	0.0945699		0.0945699	0.394737			0.451923		0.451923	0.3	0.333334	0.54947
Tectonic2	Nontoxin	Nontoxin	21.02	15.77	6.19	24.09	15.43	15.35	10.45	15.03	15.4162	5.56394	0.360914	FALSE	2040	0.274725	0	9	15	15	0	15	9	24	-0.395938	-0.795313	0.291944	0.0749362	0.110272		-0.0315788	0.107143	0.073517	-0.125926	0.052304	0.109774
TEFB1	Nontoxin	Nontoxin	310.1	257.54	380.31	222.55	287.44	298.49	359.16	211.34	290.866	60.0074	0.206306	FALSE	339	0.533333	0	1	0	0	0	0	1	1	1.52862		1.52862	0.201893	0	0.6	0.75431	-1.8	-0.15748	1.11022e-16	0.266667	0.307428
Telethonin	Nontoxin	Nontoxin	144.95	823.18	37.75	65.79	8.99	43.32	20.03	82.16	153.271	274.008	1.78773	TRUE	546	0.313889	0	4	0	0	0	0	4	4	-0.648609		-0.648609	0.37126	0.25	0.057143	0.263369	0.6	0.339309	0.481482	0.0013468	0.151091
TERATPase	Nontoxin	Nontoxin	16.46	46.83	16.72	29.59	19.85	28.18	29.75	28.02	26.925	9.84	0.36546	FALSE	2424	0.246296	0	17	1	1	0	1	17	18	-0.728473	-1.16221	-0.63079	0.0540736	-0.0375	-0.169065	0.12826	-0.0807927	0.0697261	-0.0715318	0.0814816	0.149291
Tescalcin	Nontoxin	Nontoxin	11.41	26.62	9.5	34.02	8.16	23.15	35.93	19.21	21	10.8293	0.515682	FALSE	645	0.304167	0	4	2	2	0	2	4	6	0.0318151	-0.648609	0.439999	0.0864729	-0.166666	-0.2	0.186086	0.0245613	0.00972344	-0.008205	0.0879628	0.184256
Test264	Nontoxin	Nontoxin	17.67	25.3	14.12	19.85	5.39	15.1	21.5	14.63	16.695	5.96754	0.357445	FALSE	975	0.2625	0	3	1	1	0	1	3	4	-0.403469	-1.16221	0.067026	-0.128462	-0.166667	-1	-0.0643237	-0.428571	-0.0698	-0.5	-0.017857	-0.0386326
TetherUBX-GLUT4	Nontoxin	Nontoxin	13.85	27.14	24.7	18.33	14.3	23.83	30.06	27.81	22.5025	6.24431	0.277494	FALSE	1662	0.186667	0	3	7	7	0	7	3	10	-1.41946	-1.36612	-1.05524	0.0631802	0	-0.191688	0.0770349	0.257143	0.0813636	0.0188035	0.0488889	0.0813695
Tetraspanin-1	Nontoxin	Nontoxin	25.41	17.33	32.23	35.22	2.22	7.2	17.24	27.56	20.5512	11.7104	0.569812	FALSE	723	0.254762	0	4	3	3	0	3	4	7	-0.544893	-1.05524	0.00745111	0.192169	-0.166667	0.0140262	0.203706	-0.2	0.177039	0.211111	0.0902256	0.163409
Tetraspanin13	Nontoxin	Nontoxin	89.62	36.93	77.8	58.8	70.76	26.16	125.85	81.29	70.9013	31.2308	0.440484	FALSE	612	0.125	0	0	1	1	0	1	0	1	-1.16221	-1.16221		-0.210526			-0.0961538		-0.0961538	-0.4	0	0.0989399
Tetraspanin14	Nontoxin	Nontoxin	24	41.76	26.46	35.85	18.56	43.57	48.19	34.96	34.1687	10.3684	0.303446	FALSE	819	0.152083	0	4	0	0	0	0	4	4	-1.54972		-1.54972	0.193435	0	0.257143	0.131579	-0.033766	0.131579	0.666667	-0.0357143	-0.0340689
Tetraspanin3-1	Nontoxin	Nontoxin	24.06	33.92	42.42	22.78	23.37	33.54	41.51	25.11	30.8387	8.14413	0.264087	FALSE	747	0.144697	0	6	5	5	0	5	6	11	-1.96408	-1.69167	-1.7981	0.134192	0	0.306123	-0.0807084	0.428571	-0.0581983	0.118519	0.00216455	-0.0313267
Tetraspanin3-2	Nontoxin	Nontoxin	32.03	108.46	54.04	85.85	42.27	71.79	79.04	77.71	68.8988	24.8724	0.360999	FALSE	762	0.125	0	1	0	0	0	0	1	1	-1.16221		-1.16221	0	0	-0.428571	0.131579				0	-0.0640732
Tetraspanin31	Nontoxin	Nontoxin	26.9	27.23	28.68	24.17	27.64	34.94	63.4	25.04	32.25	12.9981	0.403041	FALSE	642	0.233333	0	1	0	0	0	0	1	1	-0.448318		-0.448318	0.122137		0.6	-0.0961538	0.6	-0.0961538	1.11022e-16	0.166667	-0.128487
Tetraspanin6	Nontoxin	Nontoxin	8.62	20.42	10.57	8.87	13.37	7.41	14.31	7.1	11.3337	4.51826	0.398655	FALSE	759	0.227381	0	6	1	1	0	1	6	7	-0.865032	-1.16221	-0.646516	0.165413	0.222222	0.0428572	0.0951417	-0.38961	0.330276	0.422222	-0.0376766	0.0397565
Tetratricopeptide1	Nontoxin	Nontoxin	19.97	44.71	34.27	27.64	30.46	26.35	49.66	46.56	34.9525	10.8157	0.309439	FALSE	840	0.125	0	2	0	0	0	0	2	2	-1.49796		-1.49796	0.27451	0	0.6		0.0857145	0.131579	0.666667	0	-0.0640732
Tetratricopeptide35	Nontoxin	Nontoxin	40.93	43.05	71.42	43.72	38.72	59.52	59.14	37.09	49.1987	12.4886	0.253841	FALSE	894	0.252083	0	3	1	1	0	1	3	4	-0.511606	0.155746	-0.707875	0.0251468			0.121106		0.121106	-0.176923	0.152778	0.348113
Tetratricopeptide39C	Nontoxin	Nontoxin	15.5	27.79	18.09	24.14	19.4	24.38	31.9	21.66	22.8575	5.34936	0.234031	FALSE	1722	0.272222	0	1	2	2	0	2	1	3	-0.280343	-1.03789	1.03439	0.286498	0	0.6	0.329078	0.0857145	0.263245	0.333334	0.233333	0.219814
TF-AP-1	Nontoxin	Nontoxin	4.15	31.8	5.26	10.62	10.99	8.58	7.16	18.47	12.1288	9.09368	0.749762	FALSE	945	0.293333	0	5	0	0	0	0	5	5	-0.0878347		-0.0878347	-0.0944833	0		0.146085	-0.714286	-0.125881	-0.226667	0.0240741	0.249457
TF-ATF4	Nontoxin	Nontoxin	517.27	722.3	372.34	628.29	350.72	343.73	392.78	496.19	477.953	139.795	0.292486	FALSE	1053	0.226667	0	3	2	2	0	2	3	5	-0.816852	-1.03789	-0.413947	-0.0779648	0	0.018182	-0.150178	0.6	-0.0961538	-0.16	0.00666672	-0.039471
TF-ATF6a	Nontoxin	Nontoxin	14.73	19.18	28.91	13.57	24.06	19.97	47.27	26.19	24.235	10.7181	0.442259	FALSE	1941	0.300641	0	9	4	4	0	4	9	13	-0.0092721	0.115588	-0.0730628	0.203249	0.0700001	0.0249	0.218018	0.303531	0.28415	-0.196296	0.174298	0.158492
TF-BTF3-1	Nontoxin	Nontoxin	126.78	177.08	230.05	173.7	169.17	163.91	275.45	254.62	196.345	51.1348	0.260433	FALSE	477	0.4	0	2	0	0	0	0	2	2	0.837748		0.837748	0.410256	0	0.428571	0.555556	0.428571	0.555556		0.5	0.309927
TF-BTF3-2	Nontoxin	Nontoxin	148.54	347.81	228.1	243.25	134.36	221.25	285.25	268.94	234.688	70.011	0.298316	FALSE	489	0.25	0	3	0	0	0	0	3	3	-0.494109		-0.494109	0.253535	0	0.163636	0.323017	0.3	0.229701	0.311111	0.122807	0.184753
TF-II-I	Nontoxin	Nontoxin	12.88	45.38	16.29	22.87	21.84	35.18	19.28	14.09	23.4763	11.2722	0.480151	FALSE	1932	0.35147	0	13	4	4	0	4	13	17	0.659357	0.807664	0.532139	0.216516	-0.111111	0.201458	0.303413	0.249077	0.257011	0.0120769	0.234098	0.234292
TF-IIF2	Nontoxin	Nontoxin	20.24	65.52	43.7	38.62	37.56	42	54.46	35.22	42.165	13.4256	0.318405	FALSE	789	0.3	0	7	0	0	0	0	7	7	-0.0159664		-0.0159664	0.0599984	-0.116667	0.0541355	0.0621662	-0.337143	0.041802	0.088889	0.0190476	0.145156
TF-LIM-LMO4	Nontoxin	Nontoxin	17.03	18.69	34.78	89.49	17.47	47.89	54.68	54.03	41.7575	25.1161	0.601475	FALSE
TF-SAM-Ets	Nontoxin	Nontoxin	34.97	30.95	63.95	83.32	38.84	60.37	73.1	45.99	53.9363	19.0917	0.353968	FALSE	1032	0.125	0	1	0	0	0	0	1	1	-1.16221		-1.16221	-0.210526			-0.0961538		-0.0961538	-0.4	0	0.0989399
TF-Y-g1	Nontoxin	Nontoxin	8.32	18.05	8.73	11.37	11.85	25.25	22.06	18.39	15.5025	6.33263	0.408491	FALSE	1005	0.426666	0	5	0	0	0	0	5	5	1.3702		1.3702	0.236601	0.04	0.188961	0.562338	-0.836364	0.00107975	0.3	0.140741	0.256138
TF-Ybox	Nontoxin	Nontoxin	1051.39	802.22	558.27	848	567.71	1059.83	1470.99	2320.22	1084.83	580.355	0.534974	FALSE
TFIID12	Nontoxin	Nontoxin	22.49	31.04	31.34	28.12	17.03	30.54	29.43	23.78	26.7213	5.13164	0.192043	FALSE
THEM2	Nontoxin	Nontoxin	16.79	21.08	17.28	12.13	13.85	10.82	8.44	16.1	14.5612	4.05505	0.278483	FALSE	432	0.161111	0	3	0	0	0	0	3	3	-1.34917		-1.34917	-0.0996383		0.6	-0.0961538	0.6	-0.0961538	-0.266667	0.0555557	0.0231309
Thioesterase4	Nontoxin	Nontoxin	4.89	16.61	11.3	5.38	8.91	8.7	8.28	6.34	8.80125	3.79049	0.430676	FALSE	759	0.311111	0	5	4	4	0	4	5	9	0.118768	0.850919	-0.525245	0.477892	0	0.809524	0.491759	0.285714	0.379737	0.466667	0.244444	0.341282
Thiolase	Nontoxin	Nontoxin	17.53	38.37	32.87	39.23	15.2	27.27	35.11	21.67	28.4062	9.41626	0.331485	FALSE	1194	0.295833	0	8	6	6	0	6	8	14	-0.0713873	0.126466	-0.215716	0.236709	-0.25	0.501654	0.237648	0.155556	0.14513	-0.0020512	0.238492	0.146742
Thioredox15	Nontoxin	Nontoxin	68.01	87.61	98.4	72.04	57.15	83.23	96.48	68.55	78.9337	14.7829	0.187283	FALSE	1044	0.3375	0	1	3	3	0	3	1	4	0.375116	0.387675	0.155746	0.251254	0.166667	0.100478	0.0927715	0.536842	0.309877	0.278205	0.0745615	0.310002
Thioredoxin-1	Nontoxin	Nontoxin	814.18	1178	845.02	1103	794.38	939.65	1378.2	1032.6	1010.63	203.525	0.201384	FALSE
Thioredoxin-2	Nontoxin	Nontoxin	20.37	33.36	25.28	13.63	21.99	20.61	26.02	13.33	21.8238	6.60665	0.302728	FALSE
Thioredoxin17	Nontoxin	Nontoxin	92.4	93.97	174.89	107.11	83.85	102.12	137.97	163.88	119.524	34.8291	0.291399	FALSE	375	0.233333	0	1	0	0	0	0	1	1	-0.448318		-0.448318	1		1		1		1	0	-0.132075
Thioredoxin4A	Nontoxin	Nontoxin	25.48	37.91	39.12	11.04	15.42	17.51	35.02	43.06	28.07	12.3068	0.438431	FALSE
Thioredoxin9	Nontoxin	Nontoxin	21.54	35.52	36.15	26.97	20.98	30.8	44.69	37.16	31.7263	8.23119	0.259444	FALSE	681	0.233333	0	1	0	0	0	0	1	1	-0.448318		-0.448318	-0.0952381	-0.333333	-0.428571	0.131579	-0.428571	0.131579		0.166667	0.0559441
THO-4	Nontoxin	Nontoxin	22.6	82.29	39.53	53.76	44.34	94.87	65.55	54.75	57.2112	23.3326	0.407832	FALSE	762	0.1	0	1	1	1	0	1	1	2	-0.720697	-0.720697							-0.0961538		-0.0961538	-0.0961538
THO7	Nontoxin	Nontoxin	22.44	56.39	33.81	43.09	31.36	34.93	46.32	28.93	37.1588	10.8438	0.291823	FALSE
Threonyl-tRNASyn	Nontoxin	Nontoxin	46.54	118.6	49.07	63.41	49.6	80.06	70.93	50.73	66.1175	24.3862	0.368831	FALSE	2139	0.301667	0	16	4	4	0	4	16	20	0.00401886	-0.792762	0.254704	0.0235514	0.0897436	0.270426	0.01638	0.0866439	-0.0644504	-0.26908	0.0354365	-0.0143961
ThymicStromal	Nontoxin	Nontoxin	27.86	25.52	19.03	21.5	21.77	23.37	23.14	36.48	24.8337	5.40449	0.217627	FALSE	1398	0.207778	0	9	6	6	0	6	9	15	-1.21652	-1.59303	-0.761395	-0.182563	-0.25	-0.428571	-0.0532785	-0.714286	-0.036039	-0.477656	0.0486609	0.168689
TIF-1b	Nontoxin	Nontoxin	0	0	0	103.76	0	75.52	0	0	22.41	42.1761	1.88202	TRUE
TIF-2-1-1	Nontoxin	Nontoxin	31.34	49.74	81.34	50.24	53.4	59.8	93.82	60.76	60.055	19.5129	0.324917	FALSE	948	0.233333	0	1	0	0	0	0	1	1	-0.448318		-0.448318	0.122137			0.172414		0.172414	8.88178e-17	0.166667	0.347826
TIF-3D	Nontoxin	Nontoxin	86.3	106.99	150.76	101.13	102.75	94.92	178.63	141.18	120.332	32.5554	0.270545	FALSE	1644	0.3625	0	4	0	0	0	0	4	4	0.634645		0.634645	0.254211	-0.166666	-0.033766	0.162624	0.251948	0.0975167	0.388889	0.0555557	0.185913
TIF-3E	Nontoxin	Nontoxin	200.84	265.23	337.87	273.47	188.27	190.03	427.77	398.65	285.266	94.1708	0.330115	FALSE	1338	0.236111	0	3	0	0	0	0	3	3	-0.627713		-0.627713	0.428792	0	0.0857145	0.442945	0.6	0.75431	0.666667	0.177778	0.241285
TIF-3I	Nontoxin	Nontoxin	177.52	292.4	332.39	245.16	171.12	243.72	396.51	314.05	271.609	77.4193	0.28504	FALSE	978	0.376667	0	5	0	0	0	0	5	5	0.823437		0.823437	-0.124586	-0.0833332	-0.282467	-0.154477	-0.0681817	-0.0142092	-0.312727	0.00048264	-0.016924
TIF-3K	Nontoxin	Nontoxin	163.73	270.54	200.72	263.16	126.18	185.32	244.88	322.82	222.169	64.4907	0.290278	FALSE	657	0.202083	0	4	0	0	0	0	4	4	-1.03066		-1.03066	0.14914	0	-0.085714	-0.0498175	0.2	0.196994	0.133333	0.047619	-0.0190276
TIF-3L	Nontoxin	Nontoxin	53.53	82.89	93.91	68.34	61.61	55.58	118.45	98.02	79.0413	23.2033	0.293559	FALSE	1692	0.294048	0	7	0	0	0	0	7	7	-0.085562		-0.085562	0.144071	-0.0266666	-0.085714	0.253486	-0.216951	0.168852	0.254545	0.118132	0.128969
TIF-4AIII	Nontoxin	Nontoxin	40.79	58.03	57.08	49.69	31.87	56.3	68.9	61.22	52.985	11.8305	0.223281	FALSE	1233	0.445833	0	4	0	0	0	0	4	4	1.49974		1.49974	0.334511	-0.25	0.619047	0.570882	-0.488722	0.266494	0.722222	0.363636	0.272238
TIF-4E1	Nontoxin	Nontoxin	31.06	54.39	8.82	155.92	45.45	54.82	92.42	136.02	72.3625	51.4574	0.711105	FALSE	366	0.318182	0	3	0	0	0	0	3	3	0.0937468		0.0937468					-0.567099	0.374589	0.666667	0.367614	0.208333
TIF-4E2	Nontoxin	Nontoxin	49.56	67.12	65.84	70.62	57.06	75.03	78.81	63.77	65.9763	9.43721	0.14304	FALSE	744	0.243056	0	6	0	0	0	0	6	6	-0.662291		-0.662291	0.0860952	0.1	-0.350649	0.323017	-0.164046	0.0556681	0.216667	0.013889	0.148472
TIF-5A-1	Nontoxin	Nontoxin	170.93	265.4	130.69	223.32	180.12	215.41	261.1	130.52	197.186	52.915	0.26835	FALSE	465	0.152083	0	4	0	0	0	0	4	4	-1.54972		-1.54972	-0.105263	0		-0.0961538	-0.714286	0.0473179	-0.4	0	0.0004329
TIF-5A-2	Nontoxin	Nontoxin	8.69	26.6	49.42	15.77	30.24	32.38	49.27	23.18	29.4438	14.4736	0.491568	FALSE
TIF-eIF-2B	Nontoxin	Nontoxin	31.62	41.9	45.29	42.18	52.04	37.25	66.34	36.33	44.1187	10.8933	0.246908	FALSE	909	0.306667	0	3	2	2	0	2	3	5	0.0579688	-1.03789	0.868648	0.214012	0.0555557	0.163636	0.454612	-0.233766	0.301117	0.233333	0.239394	0.323375
TIF-elf2B-g	Nontoxin	Nontoxin	20.9	24.43	38.41	16.31	16.48	21.85	21.01	22.4	22.7237	6.93049	0.304989	FALSE	1353	0.258333	0	2	1	1	0	1	2	3	-0.413947	1.4737	-1.49796	0.364177	0.25	0.6	0.75431	0.2	0.133883	0.666667	0.037037	0.127882
TIF-IIA2	Nontoxin	Nontoxin	39.09	64.19	56.84	41.86	34.33	45.85	66.19	54.22	50.3213	11.8038	0.234568	FALSE
TIF-TFIID-7	Nontoxin	Nontoxin	8.38	21.3	21.47	17.62	15.21	18.16	19.97	18.94	17.6312	4.26122	0.241686	FALSE	1059	0.2425	0	10	0	0	0	0	10	10	-0.728491		-0.728491	-0.119744	-0.138889	-0.619047	-0.0812242	0.348371	-0.149094	-0.161905	-0.0535714	0.00363941
TIF1	Nontoxin	Nontoxin	519.96	1146.85	552.22	453.01	415.21	270.36	696.88	944.22	624.839	291.569	0.466631	FALSE
TIF2-2	Nontoxin	Nontoxin	146.15	266.82	249.3	166.58	224.5	182.15	322.68	226.11	223.036	57.7158	0.258773	FALSE
TIF2-3	Nontoxin	Nontoxin	68.75	111.62	133.85	80.26	75.8	78.21	148.04	157.64	106.771	35.7989	0.335286	FALSE	1419	0.125	0	1	0	0	0	0	1	1	-1.16221		-1.16221	0.54902		0.6		0.6		0.666667	0	-0.0640732
TIF3-G	Nontoxin	Nontoxin	76.77	174.4	225.84	248.21	124.6	272.49	319.45	240.66	210.303	80.0404	0.380597	FALSE	984	0.458333	0	7	1	1	0	1	7	8	1.87777	0.649981	1.93271	0.107203	-0.208333	-0.0272726	0.278798	-0.398701	0.199851	-0.0329003	0.246836	0.186856
TIF3-M	Nontoxin	Nontoxin	124.63	154.94	266.36	176.33	118.92	126.31	249.48	271.51	186.06	66.2102	0.355854	FALSE	1128	0.19375	0	4	0	0	0	0	4	4	-1.11717		-1.11717	0.004493	0.1	0.473684	0.183293	-0.428571	0.0177126	-0.4	0.104167	0.0870449
TIF5	Nontoxin	Nontoxin	249.93	432.89	505.07	329.15	540.1	469.93	573.27	385.18	435.69	109.696	0.251775	FALSE	1299	0.379167	0	3	1	1	0	1	3	4	0.807664	1.52862	0.254071	0.276291	0.444445	0.018182	-0.0600027	0.342857	0.315502	0.0757577	-0.0264706	-0.00510185
TIF6	Nontoxin	Nontoxin	12.82	14.36	28.35	20.35	18.51	31.73	25.77	18.15	21.255	6.7309	0.316674	FALSE	738	0.425	0	2	0	0	0	0	2	2	1.05009		1.05009	0.113712	0.25	-0.214285	-0.106902	0.6	0.366886	-0.090909	0.0592591	0.115804
TIM	Nontoxin	Nontoxin	199.83	335.97	276.11	196.21	107.45	141.06	233.28	237.42	215.916	72.5215	0.335878	FALSE	747	0.5	0	1	0	0	0	0	1	1	1.30896		1.30896	0.54902	0	0.428571	0.555556	0.428571	0.555556	1	0	0.519393
Tim10	Nontoxin	Nontoxin	44.17	62.06	76.03	26.4	25.4	38.04	93.72	83.77	56.1988	26.4754	0.471102	FALSE	273	0.225	0	2	0	0	0	0	2	2	-0.648609		-0.648609	-0.0884563	-0.333333	-0.272727	0.0177126	-0.272727	0.0177126	0.133333	-0.0333333	0.139731
tim16B	Nontoxin	Nontoxin	46.35	64.04	49.83	65.78	48.82	83.43	51	68.37	59.7025	12.894	0.215971	FALSE	378	0.212121	0	3	0	0	0	0	3	3	-0.903827		-0.903827					0.0857145	-0.163684	-0.0444443	-0.133807	-0.0666667
Tim23	Nontoxin	Nontoxin	69.84	173.15	119.28	136.88	134.1	142.48	172.81	83.07	128.951	37.4972	0.290786	FALSE	633	0.265151	0	4	0	0	0	0	4	4	0.426271		0.426271					0.0995673	-0.0998783	5.5511e-17	0.04363	-0.190476
Tim8A	Nontoxin	Nontoxin	47.68	19.94	21.03	29.66	33.17	37.8	47.95	19.79	32.1275	11.6832	0.363653	FALSE	294	0.466667	0	1	0	0	0	0	1	1	0.966291		0.966291						0.204082		0.204082	0.204082
TIMELESS	Nontoxin	Nontoxin	31.4	69.76	59.87	32.61	47.62	49.62	52.37	36.67	47.49	13.4958	0.284182	FALSE	801	0.236905	0	4	3	3	0	3	4	7	-0.753679	-0.413947	-0.836016	0.150214	0	0.257143	0.146188	0.163636	0.122097	0.0928775	0.105556	0.194598
TLC1	Nontoxin	Nontoxin	151.32	146.32	38.53	197.24	121.45	227.06	130.19	115.3	140.926	56.5227	0.40108	FALSE	744	0.142857	0	3	4	4	0	4	3	7	0.837748	0.649981	0.649981
Tm100	Nontoxin	Nontoxin	7.92	7.84	6.43	6.76	3.89	6.43	6.59	16.06	7.74	3.58175	0.462758	FALSE
Tm63C	Nontoxin	Nontoxin	35.88	79.15	58.36	47.82	30.1	43.23	67.11	49.45	51.3875	16.2271	0.315779	FALSE	2493	0.265833	0	7	3	3	0	3	7	10	-0.439729	-1.69654	0.290254	0.164595	-0.25	0.0664846	0.120481	0.0532469	0.0962179	0.233333	0.0804041	0.062879
TMBAXInh4	Nontoxin	Nontoxin	86.69	172.98	127.03	138.75	86.6	82.74	112.7	102.22	113.714	31.3382	0.275588	FALSE	711	0.125	0	1	0	0	0	0	1	1	-1.16221		-1.16221	0	0			-0.428571	0.131579		0	-0.0640732
TmEmp24b	Nontoxin	Nontoxin	407.89	710.24	312	697.93	526.67	702.12	708.42	518.14	572.926	155.835	0.271998	FALSE	639	0.313186	0	2	0	0	0	0	2	2	0.0750695		0.0750695	0.40338	0.100478		0.833333	-0.428571	0.131579		0.359115	0.134595
TMP-106B	Nontoxin	Nontoxin	35.65	32.49	48.51	20.58	21.89	10.58	52.87	70.25	36.6025	19.6641	0.537234	FALSE
TMP-126A	Nontoxin	Nontoxin	37.78	45.98	54.55	45.77	49.04	46.46	48.01	61.9	48.6862	7.06399	0.145092	FALSE	627	0.258333	0	6	2	2	0	2	6	8	-0.514786	-1.49796	0.0160399	0.289848	0.0333334	0.157303	-0.0019724	0.530736	0.247658	0.333333	0.0946638	-0.00637041
TMP-135	Nontoxin	Nontoxin	14.24	21.65	16.61	18.64	16.64	12.85	19.4	18.9	17.3663	2.8718	0.165367	FALSE	1383	0.34375	0	5	3	3	0	3	5	8	0.507036	0.788486	0.203772	0.10902	-0.333333	-0.218182	0.256615	-0.26026	0.258959	-0.0600731	0.241646	0.29935
TMP-144	Nontoxin	Nontoxin	11.28	20.23	21.54	23.66	20.81	16.8	33.67	26.51	21.8125	6.60868	0.302977	FALSE	1086	0.244444	0	2	4	4	0	4	2	6	-0.646516	-1.54972	1.08547	0.0900513	-0.25	0.0742858	0.0141245	0.342857	0.0215066	0.0533334	0.0873017	-0.00789575
TMP-5	Nontoxin	Nontoxin	29.46	14.59	38.23	29.86	24.9	24.92	39	24.72	28.21	7.93342	0.281227	FALSE	1314	0.25	0	0	3	3	0	3	0	3	-0.494109	-0.494109		0.123764	0	0.285714	0.345142	-1	0.0769231	-0.4	0.222222	0.140874
TMP-50B	Nontoxin	Nontoxin	12.13	7.99	17.53	8.27	13.46	11.09	17.31	8.81	12.0738	3.81499	0.315974	FALSE	477	0.233333	0	0	1	1	0	1	0	1	-0.448318	-0.448318		0.122137			0.172414		0.172414	8.88178e-17	0.166667	0.347826
TMP-9	Nontoxin	Nontoxin	11.16	19.39	13.05	6.28	7.51	4.5	11.11	18.59	11.4488	5.4424	0.475371	FALSE	549	0.5	0	1	0	0	0	0	1	1	1.30896		1.30896	0.682028	0.666667	0.6	1	-0.272727	0.131579	0.666667	0.298246	0.453853
TMP-C10orf57	Nontoxin	Nontoxin	11.38	26.63	11.61	1.43	3.29	14.39	7.93	8.81	10.6837	7.75293	0.725675	FALSE	393	0.217582	0	4	1	1	0	1	4	5	-0.331966	0.381009	-0.595539	0.190804	0.536842		0.278205	0.0857145	0.0798357	-0.6	0.196195	0.0717866
[truncated: 235 more rows]

## Sheet: Sheet3
CTL-1	*
SVMPIII-7	*
CTL-9
CRISP-1	*
CTL-11
SVSP-10	*
SVMPIII-5	*
CTL-2	*
SVSP-4	*
[truncated: 10 more rows]

## Sheet: Sheet2
ID	NMvC	SMvC
[truncated: 1,977 more rows]
